# Supplementary material for: A convenient and efficient C–OH bond activation, PdCl2(PPh3)2catalyzed, C–C bond formation of tautomerizable quinolinones with the aid of BOP reagent and boronic acids
Source: Royal Society of Chemistry journal article supplement (doi:10.1039/c4ra05161k), 2014-01-01
Supplement: c4ra05161k1.pdf [file c4ra05161k1.pdf]

## A convenient and efficient C-OH bond activation, PdCl<sub>2</sub>(PPh<sub>3</sub>)<sub>2</sub> catalyzed, C-C bond formation of tautomerizable quinolinones with the aid of BOP reagent and boronic acids

Yadavalli Suneel Kumar<sup>a</sup>, C. Dasaradhan<sup>a</sup>, Kamalakannan Prabakaran<sup>a</sup>, Fazlur-Rahman Nawaz Khan<sup>a\*,b\*</sup>, Euh Duck Jeong<sup>b\*</sup>, Eun Hyuk Chung<sup>b</sup>, Hyun Gyu Kim<sup>b</sup>

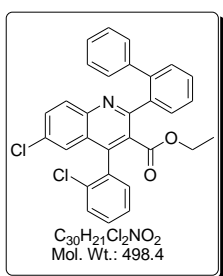

White solid, m.p 120- 122 °C, <sup>1</sup>H NMR (400 MHz, CDCl<sub>3</sub>) δ 8.05 - 8.03 (d, *J* = 8.96 Hz, 1H), 7.67 - 7.62 (m, 2H), 7.51 - 7.47 (m, 4H), 7.41 - 7.38 (t, *J* = 7.48 Hz, 1H), 7.34 - 7.30 (t, *J* = 7.43 Hz, 1H), 7.26 - 7.27 (d, *J* = 1.97 Hz, 1H), 7.18 - 7.16 (m, 2H), 7.14 - 7.12 (m, 4H), 3.66 - 3.61 (q, *J* = 7.11 Hz, 2H), 0.61 - 0.58 (t, *J* = 7.13 Hz, 3H); <sup>13</sup>C NMR (100 MHz, CDCl<sub>3</sub>) δ 166.12, 158.36, 145.86, 143.89, 140.69, 140.19, 138.75, 134.41, 133.66, 133.29, 131.58, 131.30, 130.42, 130.00, 129.86, 129.48, 129.44, 129.07, 129.04, 128.14, 127.95, 127.28, 126.65, 126.57, 125.76, 124.87, 61.03, 12.90; IR (ν, cm<sup>-1</sup>) 2997.38, 2960.73, 2926.01, 2854.65, 1726.29, 1612.49, 1546.91, 1479.40, 1450.47, 1402.25, 1384.89, 1334.74, 1261.45, 1226.73, 1184.29, 1163.08, 1145.72, 1130.29, 1099.43, 1008.77, 825.53, 752.24, 744.52, 534.28; LC-MS: m/z calcd. for C<sub>30</sub>H<sub>21</sub>Cl<sub>2</sub>NO<sub>2</sub> 498.4 found 500.0 [M+2].

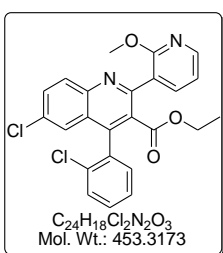

White solid, m.p 115- 118 °C, <sup>1</sup>H NMR (400 MHz, CDCl<sub>3</sub>) δ 8.26 - 8.24 (dd, *J* = 5.04, 1.83 Hz, 1H), 8.16 - 8.14 (d, *J* = 8.84 Hz, 1H), 8.03 - 8.00 (dd, *J* = 7.28, 1.82 Hz, 1H), 7.73 - 7.70 (dd, *J* = 8.99, 2.14 Hz, 1H), 7.581 - 7.56 (d, *J* = 7.96 Hz, 1H), 7.49 - 7.45 (dt, *J* = 7.51, 1.20 Hz, 1H), 7.43 - 7.39 (dt, *J* = 7.36, 0.70 Hz, 1H), 7.35 - 7.35 (d, *J* = 2.17 Hz, 1H), 7.31 - 7.29 (dd, *J* = 7.36, 1.28 Hz, 1H), 7.10 - 7.07 (t, *J* = 6.15 Hz, 1H), 3.87 (s, 3H), 3.86 - 3.83 (q, *J* = 3.09 Hz, 2H), 0.80 - 0.76 (t, *J* = 7.12 Hz, 3H); <sup>13</sup>C NMR (100 MHz, CDCl<sub>3</sub>) δ 167.4, 159.7, 156.4, 146.1, 144.1, 141.0, 133.9, 133.7, 133.4, 131.7, 131.5, 131.1, 130.5, 129.7, 129.6, 126.8, 125.9, 124.9, 121.0, 115.6, 113.6, 61.5, 55.4, 13.4; LC-MS: m/z calcd. for C<sub>24</sub>H<sub>18</sub>Cl<sub>2</sub>N<sub>2</sub>O<sub>3</sub> 453.3 found 455.0 [M+2].

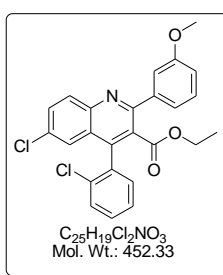

White solid m.p 121- 124 °C, <sup>1</sup>H NMR (400 MHz, CDCl<sub>3</sub>) δ 8.18 - 8.16 (d, *J* = 8.63 Hz, 1H), 7.72 - 7.69 (dd, *J* = 8.95, 2.27 Hz, 1H), 7.58 - 7.56 (dd, *J* = 7.93, 0.81 Hz, 1H), 7.49 - 7.45 (td, *J* = 7.44, 1.55 Hz, 1H), 7.42 - 7.36 (m, 2H), 7.34 - 7.29 (m, 4H), 7.01 - 6.98 (qd, *J* = 7.98, 1.36 Hz, 1H), 3.92 - 3.86 (q, *J* = 6.96 Hz, 2H), 3.86 (s, 3H), 0.84 - 0.81 (t, *J* = 7.13 Hz, 3H); <sup>13</sup>C NMR (100 MHz, CDCl<sub>3</sub>) δ 167.39, 159.73, 156.39, 146.07, 144.05, 141.03, 133.93, 133.73, 133.43, 131.72, 131.56, 131.07, 130.47, 129.74, 129.57, 127.89, 126.80, 125.90, 124.85, 121.02, 115.56, 113.63, 61.49, 55.38, 13.40; IR (ν, cm<sup>-1</sup>) 3132.40, 2995.45, 2929.87, 2833.43, 1730.15, 1606.70, 1583.56, 1573.91, 1550.77, 1490.97, 1469.76, 1450.47, 1435.04, 1396.46, 1346.31, 1288.45, 1244.09, 1226.73, 1213.23, 1170.79, 1112.93, 1087.85, 1053.13, 1020.34, 754.17; LC-MS: m/z calcd. for C<sub>25</sub>H<sub>19</sub>Cl<sub>2</sub>NO<sub>3</sub> 452.3 found 454.0 [M+2].

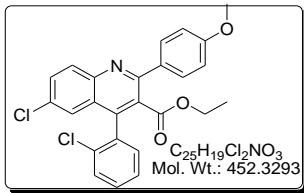

White solid, m.p 140- 142 °C, <sup>1</sup>H NMR (400 MHz, CDCl<sub>3</sub>) δ 8.16 - 8.13 (d, *J* = 8.94 Hz, 1H), 7.75 - 7.73 (d, *J* = 2.13 Hz, 2H), 7.71 - 7.68 (dd, *J* = 8.99, 2.33Hz, 1H), 7.59 - 7.56 (dd, *J* = 7.98, 0.72 Hz, 1H), 7.49 - 7.45 (td, *J* = 7.45, 1.73 Hz, 1H), 7.42 - 7.38 (td, *J* = 7.44, 1.12 Hz, 1H), 7.32 - 7.29 (m, 2H), 7.01 - 6.99 (d, *J* = 8.82 Hz, 2H), 3.95 - 3.89 (q, *J* = 7.12 Hz, 2H), 3.86 (s, 3H), 0.88 - 0.84 (t, *J* = 7.13 Hz, 3H); <sup>13</sup>C NMR (100 MHz, CDCl<sub>3</sub>) δ 167.7, 160.6, 156.0, 146.2, 143.9, 134.1, 133.8, 133.1, 132.2, 131.6, 131.4, 131.1, 130.4, 130.1, 129.7, 127.7, 126.8, 125.6, 124.8, 114.0, 61.4, 55.4, 13.5

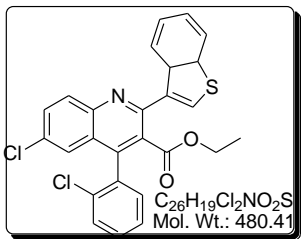

Off white solid, m.p 160- 162 °C, <sup>1</sup>H NMR (400 MHz, CDCl<sub>3</sub>) δ 8.21 - 8.18 (d, *J* = 9.02 Hz, 1H), 8.15 - 8.13 (dd, *J* = 7.09, 1.32 Hz, 1H), 7.92 - 7.89 (dd, *J* = 6.90, 2.11 Hz, 1H), 7.77 (s, 1H), 7.75 - 7.72 (dd, *J* = 8.98, 2.30 Hz, 1H), 7.59 - 7.58 (d, *J* = 7.73 Hz, 1H), 7.50 - 7.34 (m, 6H), 3.83 - 3.81 (q, *J* = 2.93 Hz, 2H), 0.75 - 0.72 (t, *J* = 7.14 Hz, 3H); <sup>13</sup>C NMR (100 MHz, CDCl<sub>3</sub>) δ 167.1, 151.5, 146.1, 144.1, 140.1, 138.1, 135.1, 133.8, 133.7, 133.6, 131.8, 131.4, 131.0, 130.5, 129.7, 128.7, 127.5, 126.8, 125.9, 124.9, 124.9, 124.7, 123.8, 122.5, 61.5, 13.3.; IR (v, cm<sup>-1</sup>) 3089, 2978, 2864, 1722, 1597, 1564, 1545, 1489, 1469, 1431, 1402, 1313, 1300, 1221, 1128, 1088, 1009, 835, 759.

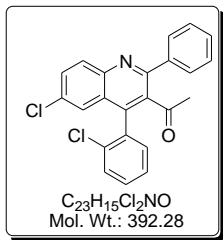

White solid, m.p 111- 114 °C, <sup>1</sup>H NMR (400 MHz, CDCl<sub>3</sub>) δ 8.195 - 8.173 (d, *J* = 8.96 Hz, 1H), 7.733 - 7.688 (m, 3H), 7.562 - 7.539 (dd, *J* = 1.41, 1.41 Hz, 1H), 7.505 - 7.402 (m, 5H), 7.340 - 7.317 (dd, *J* = 7.59, 1.40 Hz, 1H), 7.309 - 7.303 (d, *J* = 2.17 Hz, 1H), 1.938 (s, 3H).; <sup>13</sup>C NMR (100 MHz, CDCl<sub>3</sub>) δ 203.68, 155.58, 145.92, 142.20, 139.53, 135.43, 133.49, 133.43, 133.05, 131.90, 131.54, 131.48, 130.54, 129.82, 129.42, 129.12, 128.84, 126.96, 126.11, 124.82, 31.77.; IR (v, cm<sup>-1</sup>), 3224.98, 3091.89, 3059.10, 2995.45, 2958.80, 2922.16, 2852.72, 1697.36, 1639.49, 1627.92, 1548.84, 1483.26, 1467.83, 1444.68, 1431.18, 1394.53, 1342.46, 1226.73, 1195.87, 1180.44, 1130.29, 1097.50, 1078.21, 1055.06, 1033.85, 972.12, 921.97, 827.46, 794.67, 765.74, 754.17, 732.95, 721.38.; LC-MS: m/z calcd. for C<sub>23</sub>H<sub>15</sub>Cl<sub>2</sub>NO 392.3 found 394.0 [M+2].

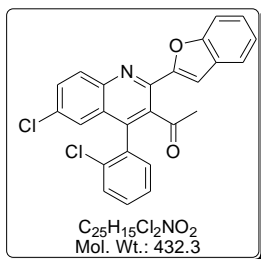

Light yellow solid, m.p 196- 199 °C, <sup>1</sup>H NMR (400 MHz, CDCl<sub>3</sub>) δ 8.175 - 8.152 (d, *J* = 9.02 Hz, 1H), 7.723 - 7.706 (dd, *J* = 6.69, 2.27 Hz, 1H), 7.700 - 7.688 (t, *J* = 2.35 Hz, 1H), 7.631 - 7.629 (d, *J* = 0.8 Hz, 1H), 7.603 - 7.581 (dd, *J* = 7.89, 0.91 Hz, 1H), 7.544 - 7.524 (d, *J* = 7.92 Hz, 1H), 7.509 - 7.486 (dd, *J* = 7.97, 1.65 Hz, 1H), 7.471 - 7.430 (dt, *J* = 7.41, 1.27, Hz, 1H), 7.387 - 7.346 (dt, *J* = 7.18, 1.14 Hz, 1H), 7.321 - 7.311 (dd, *J* = 3.06, 1.68 Hz, 1H), 7.302 - 7.293 (t, *J* = 1.85 Hz, 1H), 7.273 - 7.261 (d, *J* = 4.72 Hz, 1H), 2.325 (s, 3H).; <sup>13</sup>C NMR (100 MHz, CDCl<sub>3</sub>) δ 202.90, 155.53, 153.67, 145.92, 144.75, 141.86, 133.98, 133.86, 133.36, 132.90, 132.23, 131.73, 131.42, 130.84, 129.94, 128.30, 127.22, 126.39, 125.92, 124.67, 123.64, 122.11, 111.78, 108.67, 31.79.; IR (v, Cm<sup>-1</sup>), 3130.47, 3055.24, 2924.09, 2854.65, 1705.07, 1612.49, 1546.91, 1471.69, 1425.40, 1384.89, 1352.10, 1328.95, 1257.59, 1197.79, 1161.15, 1132.21,

1087.85, 1055.06, 912.33, 819.75, 769.60, 748.38, 540.07.; LC-MS: m/z calcd. for  $C_{25}H_{15}Cl_2NO_2$  432.3 found 434.0 [M+2].

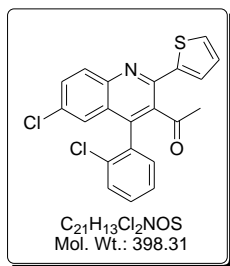

White solid, m.p 125- 128 °C,  $^1H$  NMR (400 MHz,  $CDCl_3$ )  $\delta$  8.146 - 8.123 (d,  $J = 9$ Hz, 1H), 7.695 - 7.673 (m, 1H), 7.593 - 7.582 (d,  $J = 4.52$  Hz, 1H), 7.563 - 7.543 (d,  $J = 7.75$  Hz, 1H), 7.488 - 7.411 (m, 3H), 7.334 - 7.313 (dd,  $J = 7.38, 1.08$  Hz, 1H), 7.270 - 7.265 (t,  $J = 1.88$  Hz, 1H), 2.076 (s, 3H);  $^{13}C$  NMR (100 MHz,  $CDCl_3$ )  $\delta$  204.35, 150.04, 145.90, 141.76, 140.60, 135.06, 133.31, 133.20, 133.08, 132.03, 131.47, 131.32, 130.61, 129.83, 128.39, 126.99, 126.94, 126.50, 125.97, 124.68, 31.78.; IR (v,  $cm^{-1}$ ), 3111.18, 3076.46, 2958.80, 2924.09, 2852.72, 1705.07, 1564.27, 1548.84, 1467.83, 1433.11, 1384.89, 1352.10, 1321.24, 1195.87, 1170.79, 1097.50, 1080.14, 1056.99, 1031.92, 1014.56, 970.19, 866.04, 844.82, 833.25, 808.17, 792.74, 763.81, 746.45.; LC-MS: m/z calcd. for  $C_{21}H_{13}Cl_2NOS$  398.3 found 400.0 [M+2].

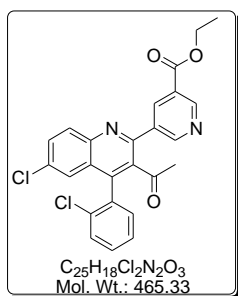

Half white solid, m.p 151- 154 °C,  $^1H$ -NMR (400 MHz,  $CDCl_3$ )  $\delta$  9.326 - 9.322 (d,  $J = 1.67$  Hz, 1H), 9.082 - 9.077 (d,  $J = 2.13$  Hz, 1H), 8.661 - 8.652 (t,  $J = 2.00$  Hz, 1H), 8.206 - 8.184 (d,  $J = 9.45$  Hz, 1H), 7.778 - 7.750 (dd,  $J = 8.99, 2.16$  Hz, 1H), 7.619 - 7.60 (d,  $J = 7.6$  Hz, 1H), 7.546 - 7.504 (dt,  $J = 7.47, 1.56$  Hz, 1H), 7.483 - 7.444 (dt,  $J = 7.47, 1.00$  Hz, 1H), 7.366 - 7.361 (d,  $J = 1.93$  Hz, 1H), 7.326 - 7.305 (dd,  $J = 7.48, 1.25$  Hz, 1H), 4.484 - 4.431 (q,  $J = 7.11$  Hz, 2H), 2.048 (s, 3H), 1.453 - 1.418 (t,  $J = 7.09$  Hz, 3H);  $^{13}C$  NMR (100 MHz,  $CDCl_3$ )  $\delta$  203.01, 164.77, 153.09, 151.71, 151.09, 146.01, 142.58, 137.46, 135.35, 135.15, 134.36, 133.12, 133.09, 132.08, 131.89, 131.59, 131.00, 130.06, 127.36, 126.19, 126.17, 124.83, 61.70, 31.91, 14.28.; IR (v,  $cm^{-1}$ )  $\delta$  3072.60, 2980.02, 2910.58, 2852.72, 1720.50, 1705.07, 1602.85, 1560.41, 1546.91, 1469.76, 1456.26, 1421.54, 1392.61, 1361.74, 1271.09, 1224.80, 1186.22, 1128.36, 1112.93, 1099.43, 1080.14, 1022.27, 831.32, 767.67, 738.74, 661.58, 557.43, 516.92.; LC-MS: m/z calcd. for  $C_{25}H_{18}Cl_2N_2O_3$  465.3 found 467.0 [M+1].

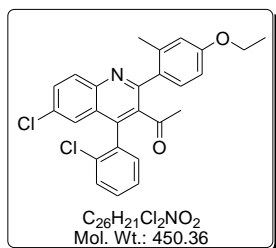

White solid, m.p 132- 135 °C,  $^1H$  NMR (400 MHz,  $CDCl_3$ )  $\delta$  8.159 - 8.137 (d,  $J = 8.97$  Hz, 1H), 7.714 - 7.687 (dd,  $J = 8.96, 1.83$  Hz, 1H), 7.563 - 7.543 (d,  $J = 7.76$  Hz, 1H), 7.479 - 7.400 (m, 2H), 7.339 - 7.322 (m, 2H), 7.230 - 7.209 (d,  $J = 8.4$  Hz, 1H), 4.089 - 4.037 (q,  $J = 7.04$  Hz, 2H), 1.886 (s, 3H), 2.282 (s, 3H), 1.442 - 1.408 (t,  $J = 6.97$  Hz, 3H);  $^{13}C$  NMR (100 MHz,  $CDCl_3$ )  $\delta$  202.66, 159.35, 156.13, 145.53, 141.48, 137.99, 136.31, 133.38, 133.18, 132.95, 131.66, 131.22, 131.08, 130.52, 130.36, 129.67, 126.85, 125.86, 124.61, 116.77, 111.52, 63.26, 31.03, 20.08, 14.66.; IR (v,  $cm^{-1}$ )  $\delta$  3053.32, 3037.89, 2980.02, 2924.09, 2899.01, 2881.65, 1703.14, 1608.63, 1568.13, 1548.84, 1502.55, 1465.90, 1435.04, 1388.75, 1350.17, 1338.60, 1294.24, 1244.09, 1193.94, 1170.79, 1124.50, 1114.86, 1078.21, 1055.06, 962.48, 879.54, 852.54, 833.25, 808.17, 790.81, 759.95.; LC-MS: m/z calcd. for  $C_{26}H_{21}Cl_2NO_2$  450.4 found 452.2 [M+1].

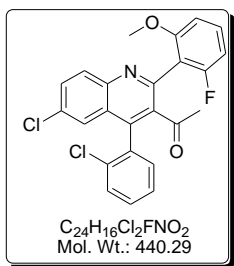

.Light yellow solid, m.p 80- 83 °C,  $^1\text{H}$  NMR (400 MHz,  $\text{CDCl}_3$ )  $\delta$  8.198 - 8.167 (dd,  $J = 8.92, 3.49$  Hz, 1H), 7.715 - 7.693 (d,  $J = 8.90$  Hz, 1H), 7.612 -7.660 (dd,  $J = 13.01, 7.97$  Hz, 1H), 7.512 - 7.475 (t,  $J = 7.51$  Hz, 1H), 7.430 - 7.413 (d,  $J = 6.85$  Hz, 1H), 7.393 - 7.270 (m, 3H), 6.872 - 6.727 (m, 2H), 3.752 (s, 3H), 1.911 (s, 3H).;  $^{13}\text{C}$  NMR (100 MHz,  $\text{CDCl}_3$ )  $\delta$  159.72, 159.26, 158.44, 158.37, 157.49, 157.42, 149.26, 146.14, 146.01, 141.19, 141.09, 136.94, 136.77, 133.88, 133.76, 133.73, 133.57, 133.44, 133.29, 132.14, 131.92, 131.61, 131.29, 131.08, 130.98, 130.91, 130.81, 130.69, 130.04, 129.95, 127.54, 127.07, 126.41, 126.15, 124.80, 124.78, 117.06, 116.98, 116.88, 116.79, 108.94, 108.72, 108.43, 108.21, 107.03, 107.00, 106.49, 106.47, 56.10, 55.83, 30.34, 29.92.; IR ( $\nu$ ,  $\text{cm}^{-1}$ ), 3116.97, 3072.60, 3008.95, 2956.87, 2926.01, 2839.22, 1699.29, 1616.35, 1579.70, 1552.70, 1471.69, 1436.97, 1384.89, 1354.03, 1276.88, 1240.23, 1197.79, 1083.99, 1035.77, 931.62, 833.25, 785.03, 744.52, 686.66. LC-MS: m/z calcd. for  $\text{C}_{24}\text{H}_{16}\text{Cl}_2\text{FNO}_2$  440.3 found 442.0 [M+2].

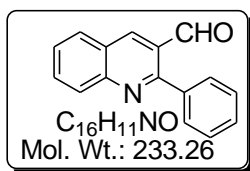

Off White solid, m.p 110- 112 °C,  $^1\text{H}$  NMR (400 MHz,  $\text{CDCl}_3$ )  $\delta$  10.191 (s, 1H), 8.867 (s, 1H), 8.236 - 8.214 (d,  $J = 8.8$  Hz, 1H), 8.042 - 8.024 (d,  $J = 7.2$  Hz, 1H), 7.090 - 7.867 (t,  $J = 8.0$  Hz, 1H), 7.705 - 7.625 (m, 3H), 7.582 - 7.561 (m, 3H).;  $^{13}\text{C}$  NMR (100 MHz,  $\text{CDCl}_3$ )  $\delta$  191.73, 160.50, 149.78, 138.3, 137.90, 132.84, 130.41, 129.76, 129.63, 129.58, 128.92, 127.80, 127.68, 126.55.; IR ( $\nu$ ,  $\text{cm}^{-1}$ ), 3053.32, 3028.24, 2927.94, 2862.36, 2746.63, 1693.50, 1676.14, 1656.85, 1614.42, 1583.56, 1575.84, 1554.63, 1487.12, 1454.33, 1384.89, 1371.39, 1157.29, 1122.57, 1076.28, 1008.77, 821.68, 775.38, 754.17, 713.66, 704.02, 613.36, 457.13.; LC-MS: m/z calcd. for  $\text{C}_{16}\text{H}_{11}\text{NO}$  233.3 found 234.0 [M+1].

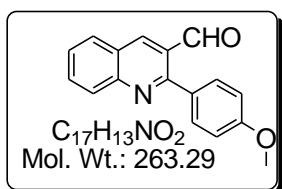

.White solid, m.p 132- 134 °C,  $^1\text{H}$  NMR (400 MHz,  $\text{CDCl}_3$ )  $\delta$  10.19 (s, 1H), 8.83 (s, 1H), 8.25 - 8.22 (t,  $J = 5.8$  Hz, 1H), 7.87 - 7.84 (t,  $J = 5.2$  Hz, 1H), 8.00 - 7.99 (d,  $J = 5.6$  Hz, 1H), 7.65 - 7.59 (m, 3H), 7.10 - 7.08 (m, 2H), 3.901 (s, 3H).;  $^{13}\text{C}$  NMR (100 MHz,  $\text{CDCl}_3$ )  $\delta$  191.77, 160.78, 159.86, 149.71, 138.20, 132.52, 131.77, 130.23, 129.50, 129.42, 127.69, 127.23, 126.20, 114.27, 55.47.; IR ( $\nu$ ,  $\text{cm}^{-1}$ )  $\delta$  3049.46, 2970.38, 2939.52, 2854.65, 2843.07, 1691.57, 1656.85, 1604.77, 1583.56, 1552.70, 1516.05, 1487.12, 1454.33, 1384.89, 1371.39, 1296.16, 1257.59, 1174.65, 1155.36, 1111.00, 1035.77, 1020.34, 842.89, 788.89, 752.24, 736.81, 549.71, 487.99.; LC-MS: m/z calcd. for  $\text{C}_{17}\text{H}_{13}\text{NO}_2$  263.3 found 264.1 . [M+1].

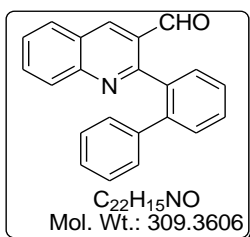

White solid, m.p 97- 99 °C,  $^1\text{H}$  NMR (400 MHz,  $\text{CDCl}_3$ )  $\delta$  9.55 (s, 1H), 8.39 (s, 1H), 8.13 - 8.12 (d,  $J = 4.0$  Hz, 1H), 7.81 - 7.73 (m, 2H), 7.640 - 7.61 (t,  $J = 4.4$  Hz, 1H), 7.52 - 7.45 (m, 3H), 7.41 - 7.39 (d,  $J = 7.8$  Hz, 1H), 6.99 - 6.95 (m, 5H);  $^{13}\text{C}$  NMR (100 MHz,  $\text{CDCl}_3$ )  $\delta$  188.78, 159.65, 148.48, 140.70, 138.45, 135.75, 135.35, 131.31, 129.71, 128.83, 128.72, 128.66, 128.39, 128.37, 127.21, 126.98, 126.31, 126.29, 126.17, 125.33; IR ( $\nu$ ,  $\text{cm}^{-1}$ )  $\delta$  3057.17, 3043.67, 3026.31, 2852.72, 2723.49, 1693.50, 1658.78,

1616.35, 1585.49, 1556.55, 1490.97, 1479.40, 1450.47, 1436.97, 1384.89, 1367.53, 1276.88, 1153.43, 1124.50, 1107.14, 1018.41, 1008.77, 920.05, 825.53, 756.10, 748.38, 700.16, 513.07; LC-MS: m/z calcd. for C<sub>22</sub>H<sub>15</sub>NO 309.4 found 310.1[M+1].

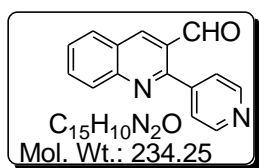

Off White solid, m.p 130-132 °C. <sup>1</sup>H NMR (400 MHz, CDCl<sub>3</sub>) δ 10.20 (s, 1H), 8.89 (s, 1H), 8.84 - 8.83 (d, *J* = 5.6 Hz, 2H), 8.24 - 8.21 (d, *J* = 8.8 Hz, 1H), 8.07 - 8.05 (d, *J* = 8.4 Hz, 1H), 7.95 - 7.91 (t, *J* = 7.7 Hz, 1H), 7.72 - 7.68 (t, *J* = 7.6 Hz, 1H), 7.62 - 7.61 (d, *J* = 5.6 Hz, 2H); <sup>13</sup>C NMR (100 MHz, CDCl<sub>3</sub>) δ 190.23, 157.50, 150.19, 149.59, 145.52, 139.09, 133.17, 129.79, 129.54, 128.31, 127.40, 126.77, 124.58; IR (ν, cm<sup>-1</sup>), 3045.60, 3024.38, 2993.52, 2872.01, 2758.21, 1689.64, 1616.35, 1598.99, 1579.70, 1544.98, 1489.05, 1409.96, 1394.53, 1375.25, 1186.22, 1161.15, 1120.64, 835.18, 786.96, 758.02, 721.38, 698.23, 540.07, 462.92; LC-MS: m/z calcd. for C<sub>15</sub>H<sub>10</sub>N<sub>2</sub>O 234.3 found 235.1 [M+1].

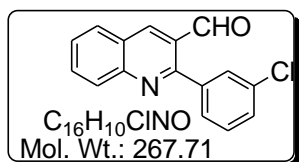

Off White solid, m.p 125- 127 °C, <sup>1</sup>H NMR (400 MHz, CDCl<sub>3</sub>) δ 9.95 (s, 1H), 8.87 (s, 1H), 8.22 - 8.20 (d, *J* = 8.4 Hz, 1H), 8.06 - 8.04 (d, *J* = 8Hz, 1H), 7.91 - 7.87 (t, *J* = 7.6 Hz, 1H), 7.70 - 7.66 (t, *J* = 7.6 Hz, 1H), 7.61 - 7.59 (t, *J* = 4 Hz, 1H), 7.54 - 7.52 (t, *J* = 3.6 Hz, 1H), 7.50 - 7.47 (m, 2H); <sup>13</sup>C NMR (100 MHz, CDCl<sub>3</sub>) δ 190.60, 158.20, 149.84, 137.74, 137.04, 133.28, 132. 88, 131.61, 130.84, 129.81, 129.79, 129.74, 128.07, 127.90, 127.63, 126.99; IR (ν, cm<sup>-1</sup>), 3068.75, 2873.94, 1693.50, 1616.35, 1587.42, 1554.63, 1494.83, 1452.40, 1435.04, 1384.89, 1371.39, 1159.22, 1124.50, 1064.71, 823.60, 765.74, 756.10, 709.80.

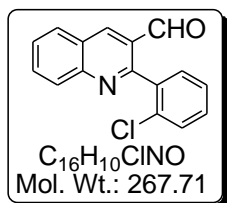

Pale yellow solid, m.p 102- 104 °C, <sup>1</sup>H NMR (400 MHz, CDCl<sub>3</sub>) δ 10.18 (s, 1H), 8.86 (s, 1H), 8.22 - 8.20 (d, *J* = 8.4 Hz, 1H), 8.04 - 8.02 (d, *J* = 8.4 Hz, 1H), 7.92 - 7.88 (t, *J* = 7.2 Hz, 1H), 7.76 - 7.75 (d, *J* = 5.6 Hz, 1H), 7.68 - 7.64 (t, *J* = 7.6 Hz, 1H), 7.53 - 7.48 (m, 3H); <sup>13</sup>C NMR (100 MHz, CDCl<sub>3</sub>) δ 191.04, 158.85, 149.70, 139.69, 138.72, 135.11, 133.08, 130.25, 130.02, 129.78, 129.70, 129.65, 128.66, 128.02, 127.65, 126.68; IR (ν, cm<sup>-1</sup>) δ 3064.89, 3030.17, 2918.30, 2866.22, 1689.64, 1616.35, 1581.63, 1556.55, 1490.97, 1477.47, 1448.54, 1396.46, 1384.89, 1367.53, 1155.36, 839.03, 779.24, 758.02, 738.74, 690.52; LC-MS: m/z calcd. for C<sub>16</sub>H<sub>10</sub>ClNO 267.7 found 268.0 [M+1].

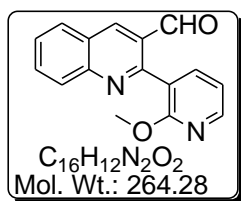

Off White solid, mp 177- 179 °C, <sup>1</sup>H NMR (400 MHz, CDCl<sub>3</sub>) δ 9.94 (s, 1H), 8.79 (s, 1H), 8.36 - 8.35 (dd, *J* = 5.00, 2.0 Hz, 1H ), 8.19 - 8.17 (d, *J* = 8.4 Hz, 1H), 8.03 - 8.01 (dd, *J* = 7.29, 2.0 Hz, 2H), 7.88 - 7.84 (dt, *J* = 8.38, 1.6 Hz, 1H), 7.66 - 7.62 (td, *J* = 8.04, 0.8 Hz, 1H), 7.17 - 7.14 (dd, *J* = 7.24, 4.8 Hz, 1H), 3.91 (s, 3H); <sup>13</sup>C NMR (100 MHz, CDCl<sub>3</sub>) δ 190.34, 160.87, 155.64, 149.77, 148.37, 139.99, 137.05, 132.18, 129.35, 129.28, 128.01, 127.48, 126.53, 121.44, 117.59, 53.40; IR (ν, cm<sup>-1</sup>), 3059.10, 2953.02, 2924.09, 2852.72, 1737.86, 1695.43, 1616.35, 1587.42, 1554.63, °1492.90, 1462.04, 1446.61, 1402.25, 1371.39,

1298.09, 1257.59, 1224.80, 1157.29, 1109.07, 1070.49, 1012.63, 806.25, 788.89, 767.6; LC-MS: m/z calcd. for C<sub>16</sub>H<sub>12</sub>N<sub>2</sub>O<sub>2</sub> 264.28 found 265.1 [M+1].

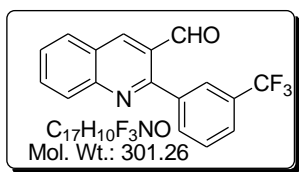

White solid, m.p 112- 114°C, <sup>1</sup>H NMR (400 MHz, CDCl<sub>3</sub>) δ 10.17 (s, 1H), 8.93 (s, 1H), 8.31 (s, 1H), 8.07 - 8.03 (m, *J* = 4.00, 2H), 7.94 - 7.92 (d, *J* = 8.00 Hz, 1H), 7.86 - 7.82 (m, *J* = 8.00 Hz, 2H), 7.73- 7.69 (m, *J* = 8.40 Hz, 2H).; <sup>13</sup>C NMR (100 MHz, CDCl<sub>3</sub>) δ 190.5, 158.5, 149.2, 139.5, 138.2, 133.8, 133.5, 131.7, 131.4, 129.7, 129.5, 129.4, 128.4, 127.6, 127.2, 127.2, 126.8, 126.5.; IR (v, cm<sup>-1</sup>) 3123, 3074, 2925, 2874, 1695, 1687, 1619, 1585., 1487, 1460, 1431, 1384. 1342, 1325, 1255, 1173, 1151, 1113, 1097, 1078, 932, 854, 810, 759, 754, 704, 652, 478.; LC-MS: m/z calcd. for C<sub>17</sub>H<sub>10</sub>F<sub>3</sub>NO 301.26 found 302.1 [M+1].

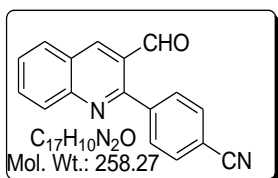

White solid, m.p 145- 147°C, <sup>1</sup>H NMR (400 MHz, CDCl<sub>3</sub>) δ 10.10 (s, 1H), 8.85 (s, 1H), 8.22 - 8.20 (d, *J* = 7.20 Hz, 1H), 8.02 - 8.00 (d, *J* = 6 Hz, 1H), 7.91 - 7.86 (t, *J* = 8.8 Hz, 1H), 7.83 - 7.80 (d, *J* = 8.4 Hz, 1H), 7.77 - 7.75 (d, *J* = 8.40 Hz, 1H), 7.71 - 7.64 (t, *J* = 6.80 Hz, 1H).; <sup>13</sup>C NMR (100 MHz, CDCl<sub>3</sub>) δ 190.2, 157.9, 149.3, 139.9, 133.6, 133.1, 132.6, 131.1, 129.7, 129.6, 128.6, 128.1, 127.6, 126.8, 113.5.; IR (v, cm<sup>-1</sup>) 3179, 3126, 2228, 1703, 1691, 1620, 1550, 1489, 1384, 852, 817, 754.

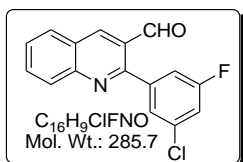

White solid, m.p 145- 147°C, <sup>1</sup>H NMR (400 MHz, CDCl<sub>3</sub>) δ 10.20 (s, 1H), 8.88 (s, 1H), 8.22 - 8.20 (d, *J* = 8.40 Hz, 1H), 8.06 - 8.04 (d, *J* = 8.00 Hz, 1H), 7.94 - 7.91 (t, *J* = 8.40 Hz, 1H), 7.71 - 7.67 (t, *J* = 8.00 Hz, 1H), 7.48 (s, 1H), 7.33 -7.27 (m, 2H).; <sup>13</sup>C NMR (100 MHz, CDCl<sub>3</sub>) δ 190.5, 149.6, 139.2, 133.3, 129.8, 129.7, 128.3, 127.5, 126.8, 126.4, 117.5, 117.2, 116.1, 115.8.; IR (v, cm<sup>-1</sup>) 3132, 3082, 3057, 3013, 1701, 1618, 1605, 1578, 1558, 1400, 1371, 1089, 862.; LC-MS: m/z calcd. for C<sub>16</sub>H<sub>9</sub>ClFNO 285.7 found 286.0[M+1]. .

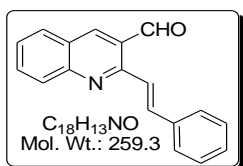

White solid, m.p 123- 128°C, <sup>1</sup>H NMR (400 MHz, CDCl<sub>3</sub>) δ 10.43 (s, 1H), 8.61 (s, 1H), 8.33 - 8.29 (d, *J* = 15.6 Hz, 1H), 8.16 - 8.14 (d, *J* = 8.40 Hz, 1H), 8.11 - 8.07 (d, *J* = 15.6 Hz, 1H), 7.95 - 7.93 (d, *J* = 8.00 Hz, 1H), 7.88 - 7.84 (t, *J* = 7.20 Hz, 1H), 7.73 - 7.71 (d, *J* = 7.60 Hz, 2H), 7.60 - 7.57 (t, *J* = 7.60 Hz, 1H), 7.44 - 7.40 (t, *J* = 7.2 Hz 2H), 7.37 - 7.33 (t, *J* = 7.20 Hz, 1H); <sup>13</sup>C NMR (100 MHz, CDCl<sub>3</sub>) δ 191.8, 154.5, 149.7, 143.9, 138.1, 136.8, 133.1, 129.6, 129.1, 128.9, 127.9, 127.3, 127.2, 126.5, 123.9; IR (v, cm<sup>-1</sup>) 3095, 3030, 2922, 2760, 1693, 1633, 1610, 1587, 1550, 1489, 1431, 1400, 1384, 1373, 1182, 1109, 985, 786, 763, 752, 711, 688; LC-MS: m/z calcd. for C<sub>18</sub>H<sub>13</sub>NO 259.3 found 260.1[M+1]. .

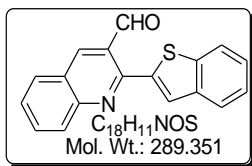

White solid, m.p 128- 130°C, <sup>1</sup>H NMR (400 MHz, CDCl<sub>3</sub>) δ 10.55 (s, 1H), 8.81 (s, 1H), 8.22 - 8.19 (d, *J* = 8.80 Hz, 1H), 8.01 - 7.99 (d, *J* = 8.40 Hz, 1H), 7.95 - 7.93 (t, *J* = 4.00 Hz, 1H), 7.90 - 7.86 (m, 2H), 7.58 (s, 1H), 7.45 - 7.41 (m, 2H); <sup>13</sup>C NMR (100 MHz, CDCl<sub>3</sub>) δ 190.9, 152.9, 149.4, 141.1, 141.1, 139.9, 138.5, 132.7, 129.4, 129.2, 127.7, 127.6, 126.2, 125.6, 124.6, 124.4, 122.3; IR (ν, cm<sup>-1</sup>) 3065, 2957, 2922, 2853, 1692, 1614, 1578, 1556, 1491, 1393, 1373, 1111, 1014, 916, 862, 800, 744.5; LC-MS: m/z calcd. for C<sub>18</sub>H<sub>11</sub>NOS 289.35 found 290.0 [M+1].

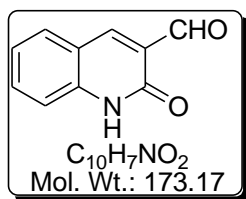

Pale yellow, m.p > 250°C, <sup>1</sup>H NMR (400 MHz, CDCl<sub>3</sub>) δ 12.27(s, 1H), 10.28 (s, 1H), 8.54 (s, 1H), 7.96 - 7.93 (d, *J* = 8.64 Hz, 1H), 7.69 - 7.67 (d, *J* = 8.44 Hz, 1H), 7.39 - 7.38 (t, *J* = 7.84 Hz, 1H), 7.29 - 7.27 (t, *J* = 7.87 Hz, 1H); <sup>13</sup>C NMR (100 MHz, CDCl<sub>3</sub>) δ 187.7, 161.4, 142.4, 141.1, 133.7, 130.9, 125.6, 122.6, 118.1, 115.4.

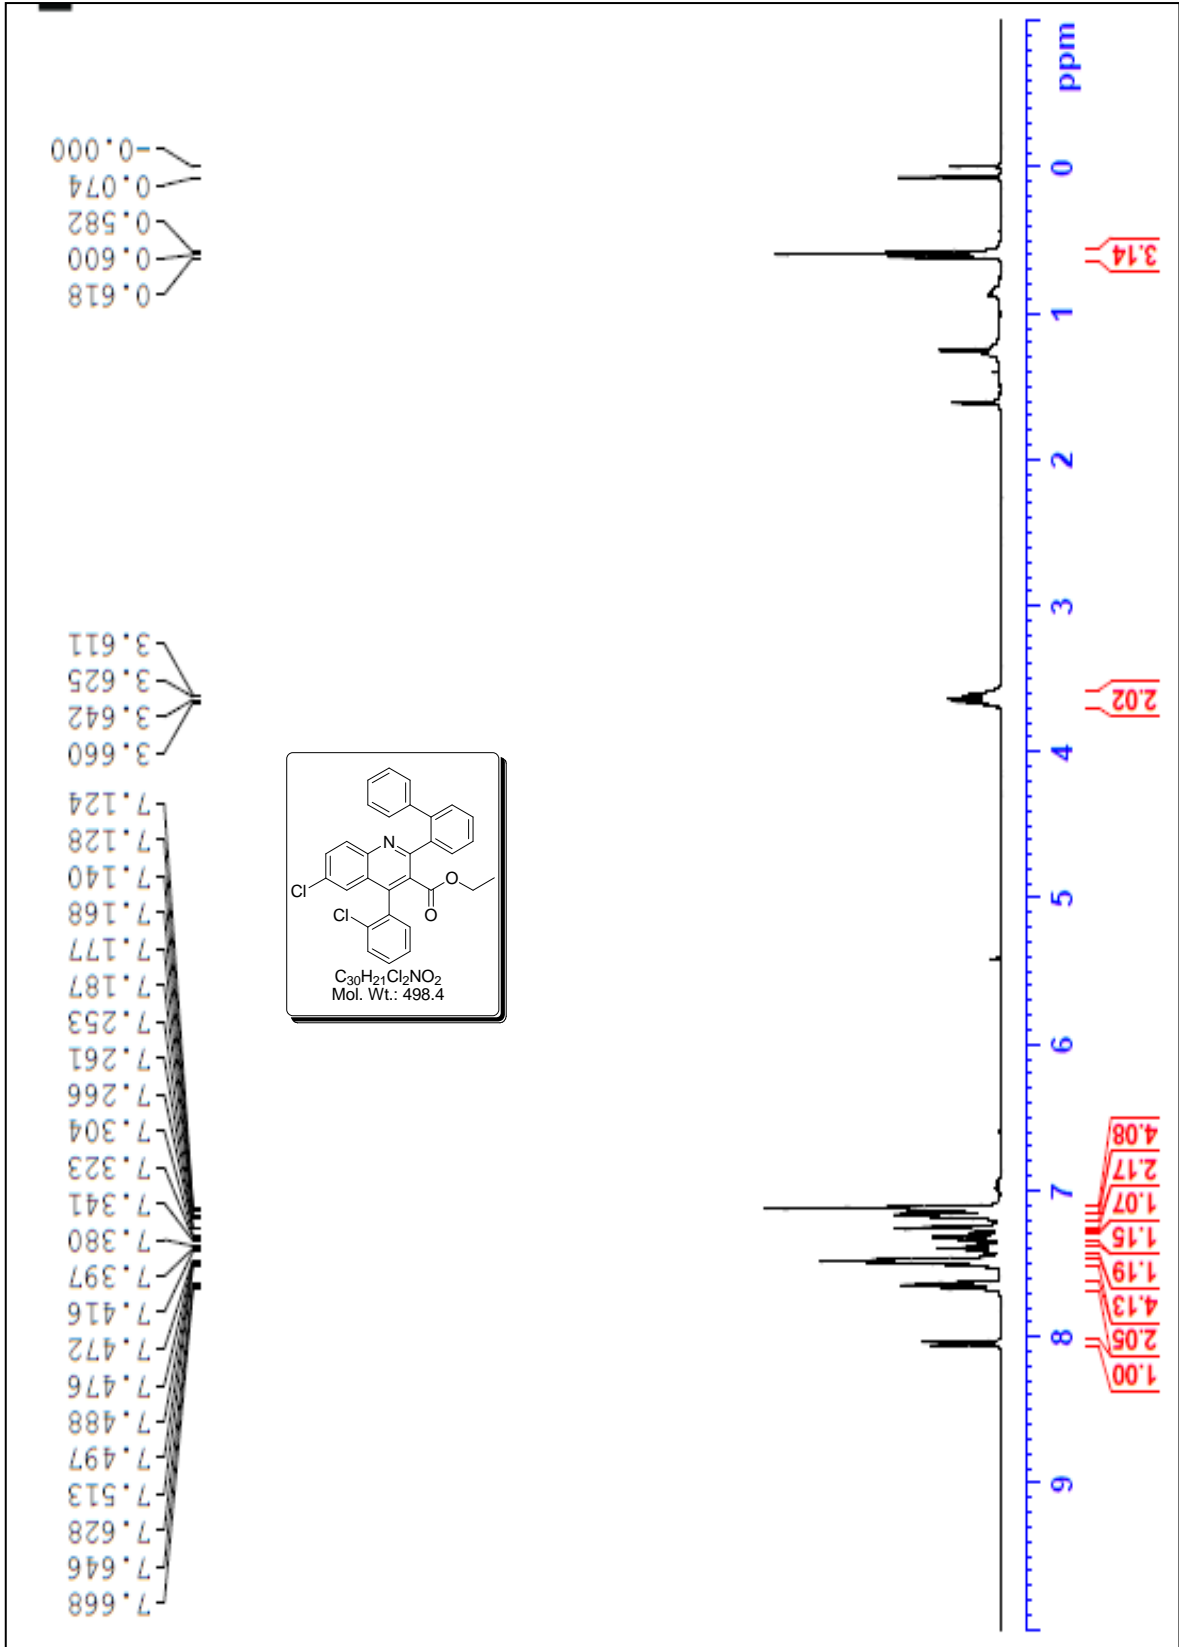



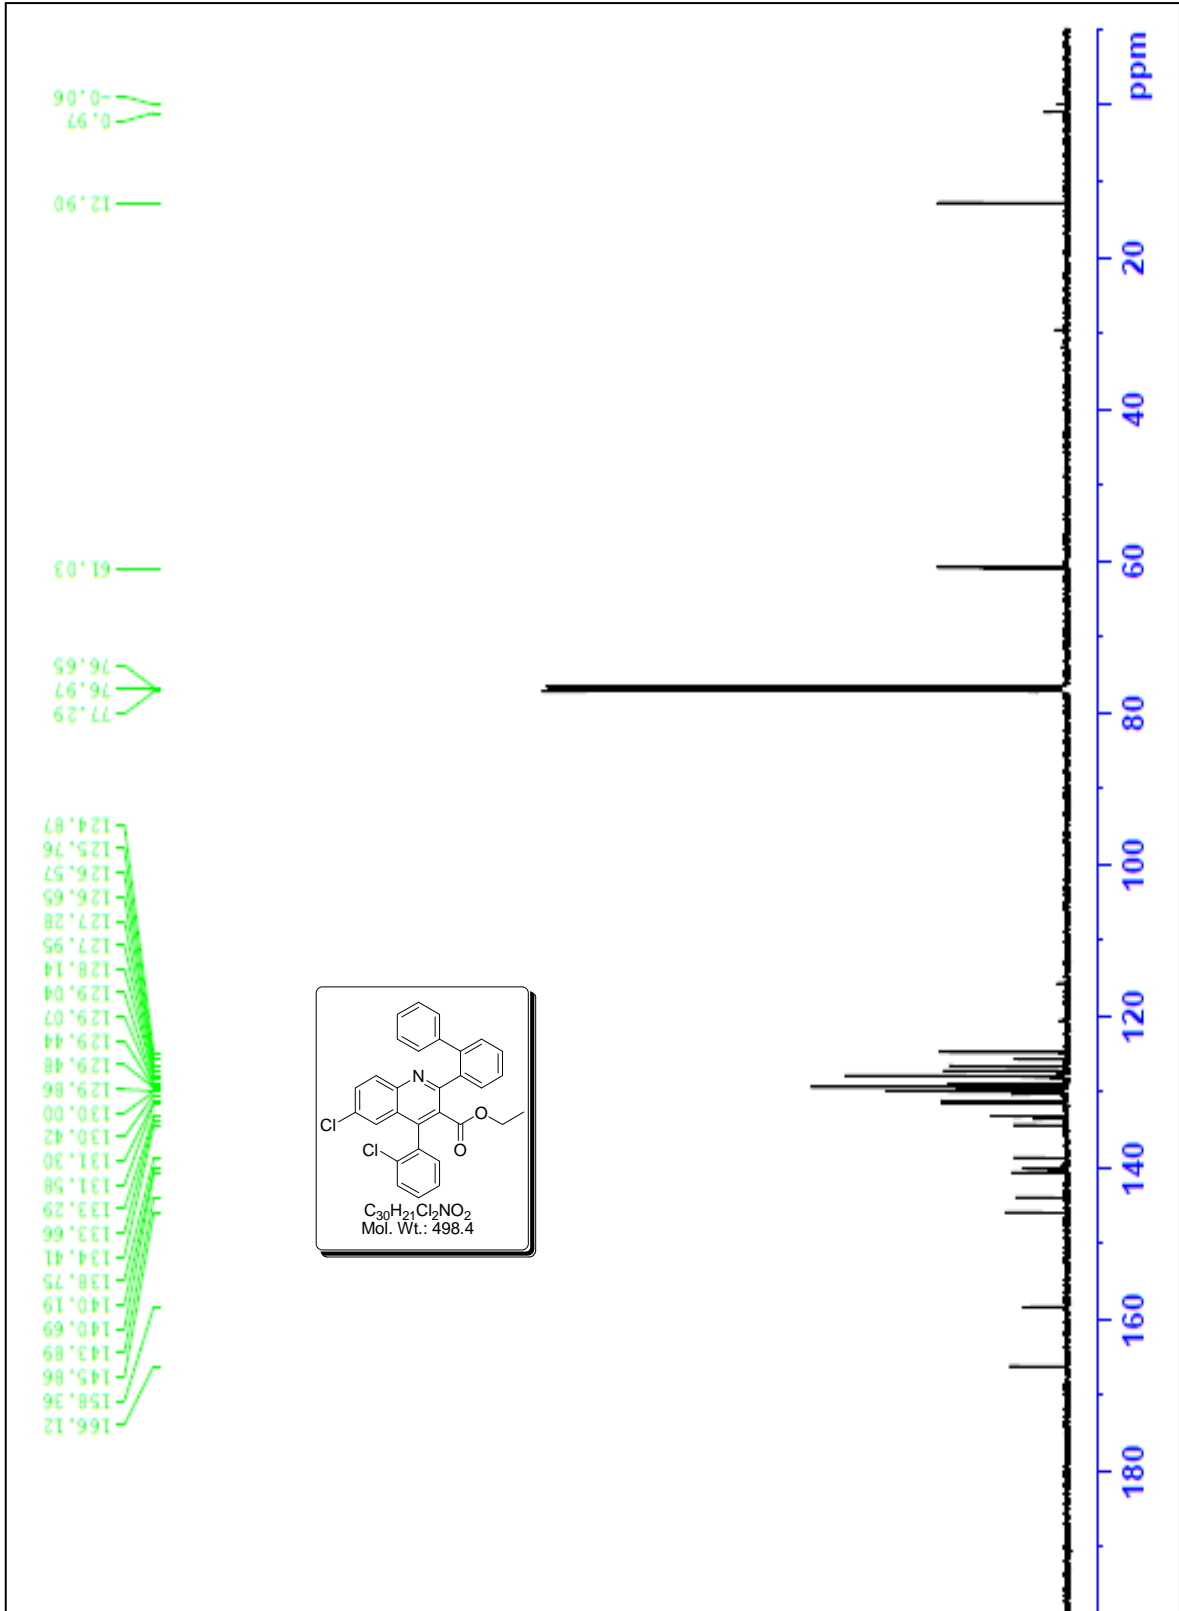

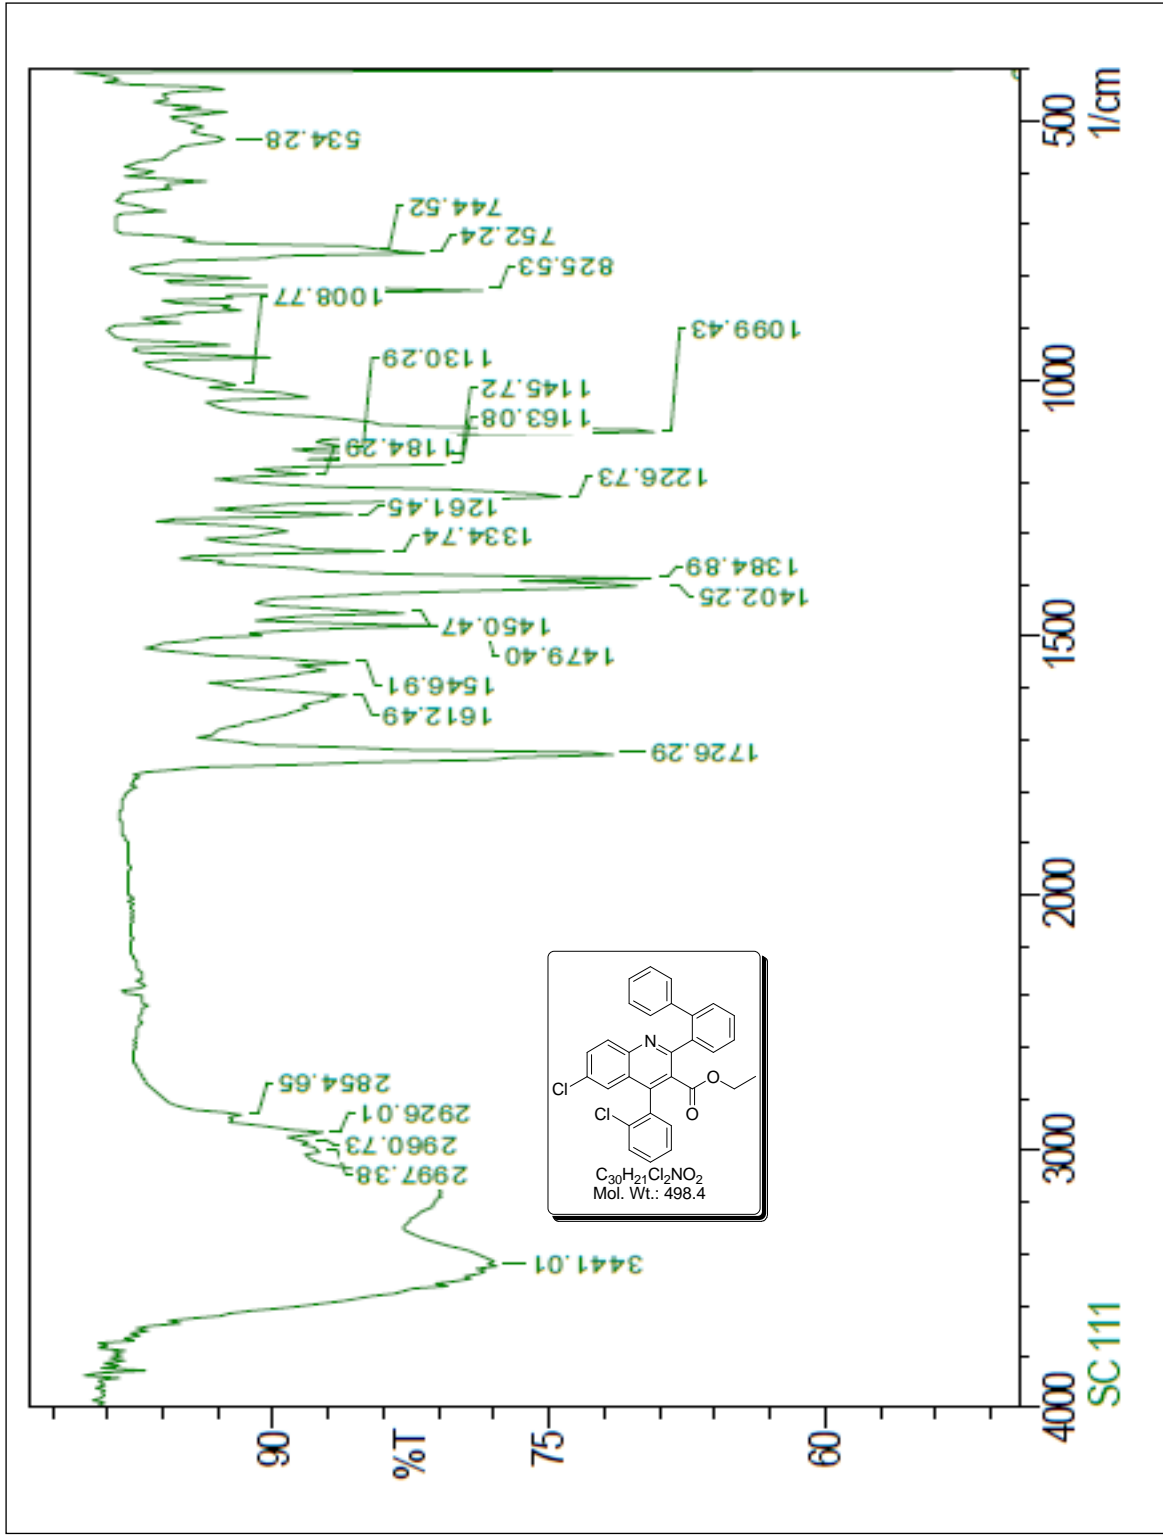

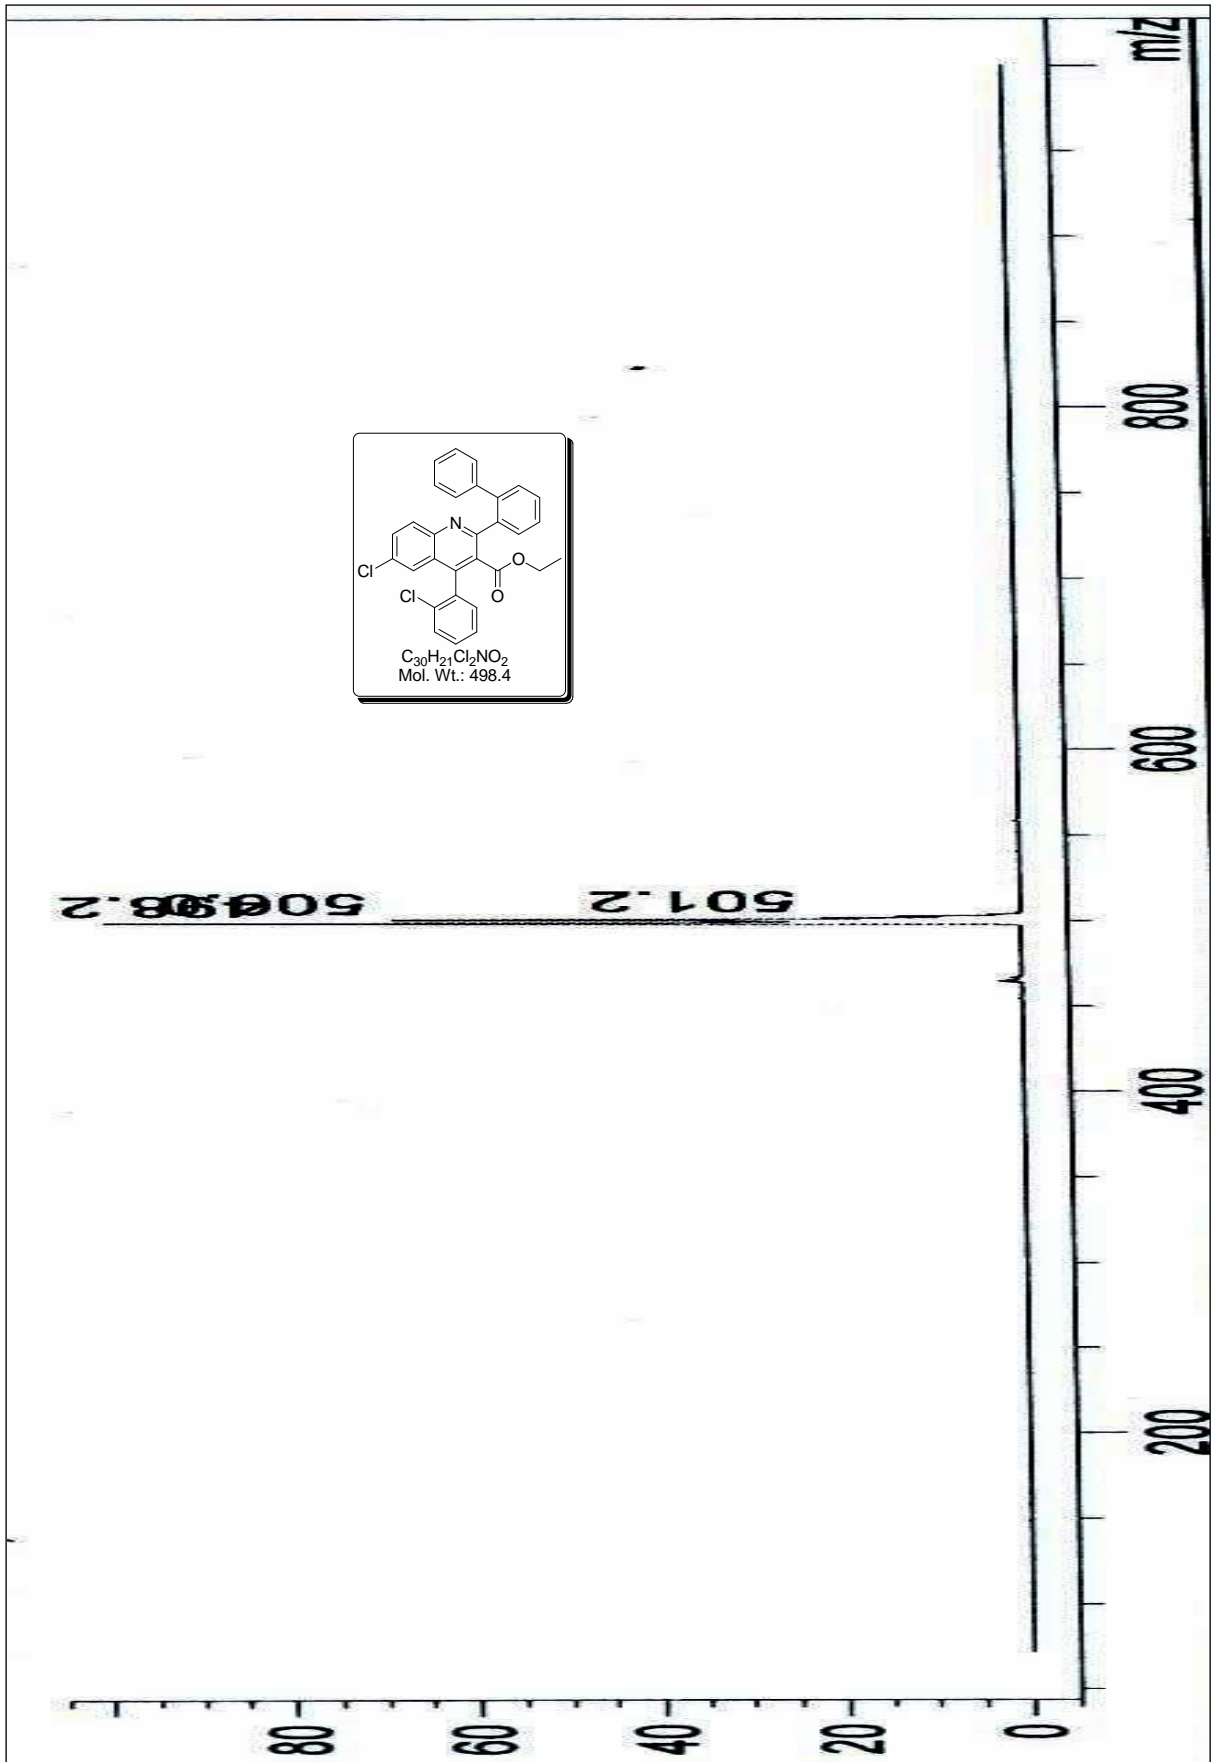

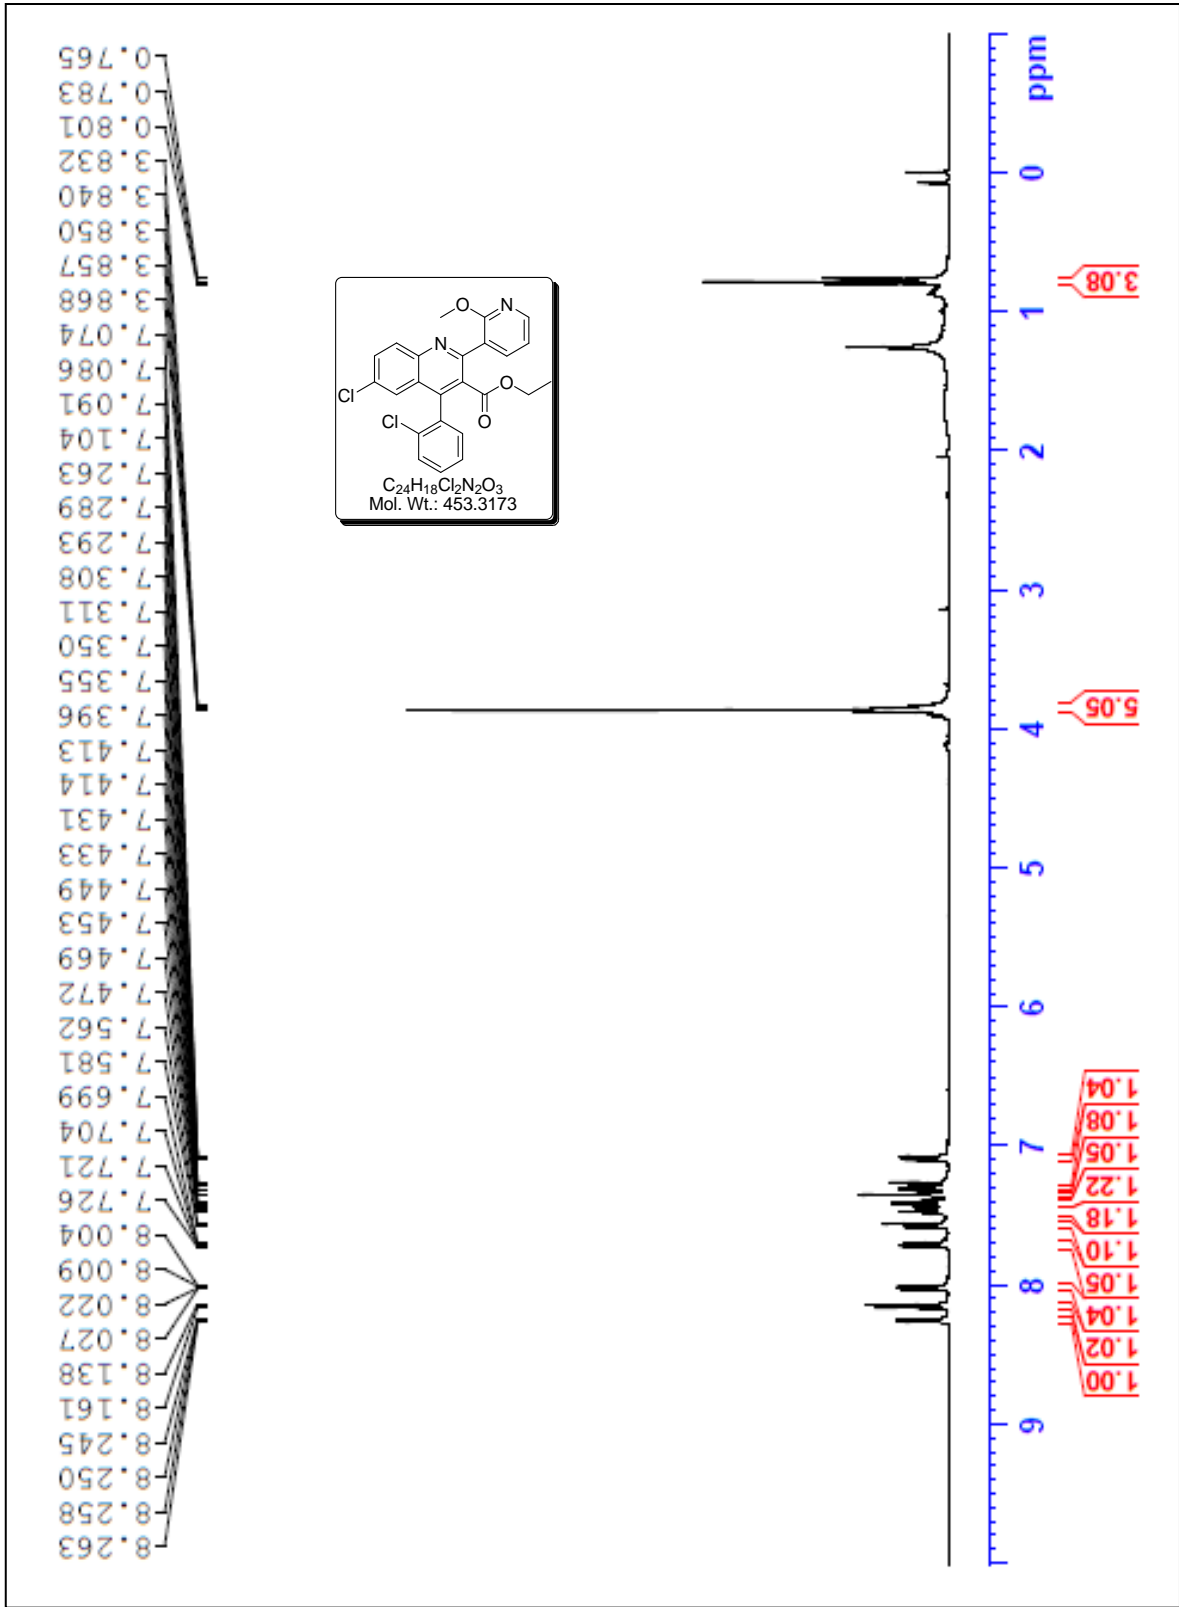

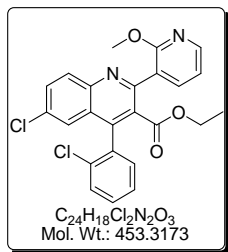

13.40

55.37

61.50

113.64  
115.59  
121.02  
124.86  
125.92  
126.80  
129.57  
129.75  
130.48  
131.07  
131.53  
131.74  
133.45  
133.73  
133.92  
140.99  
144.09  
146.06  
156.41  
159.73  
167.39

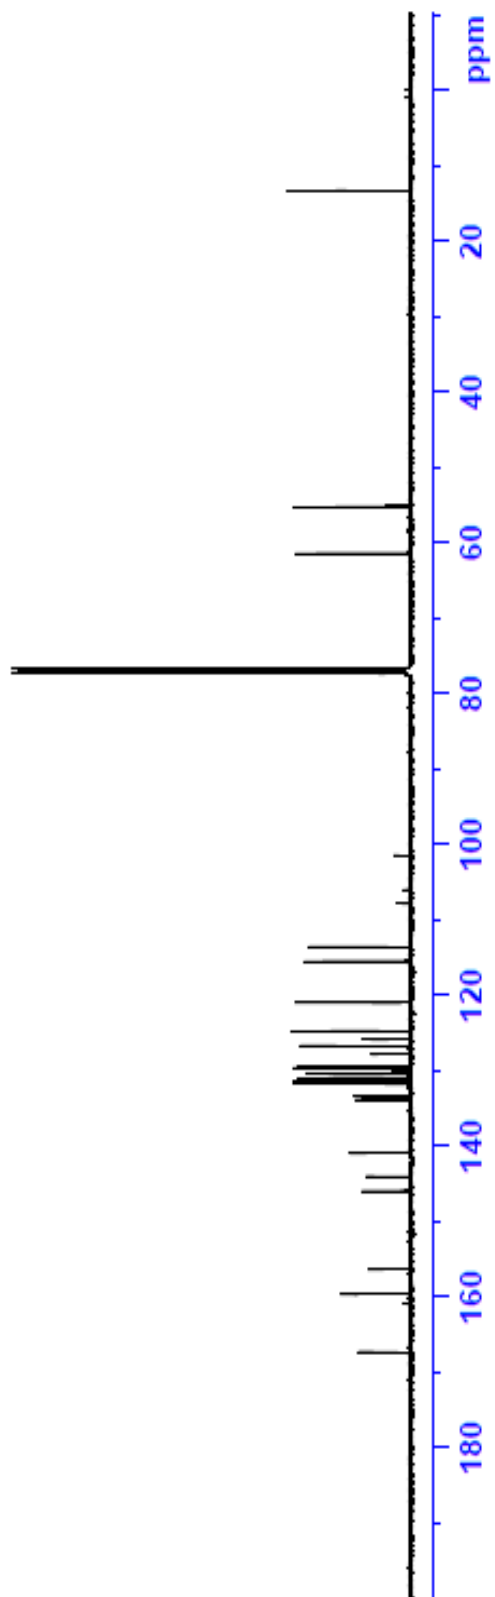

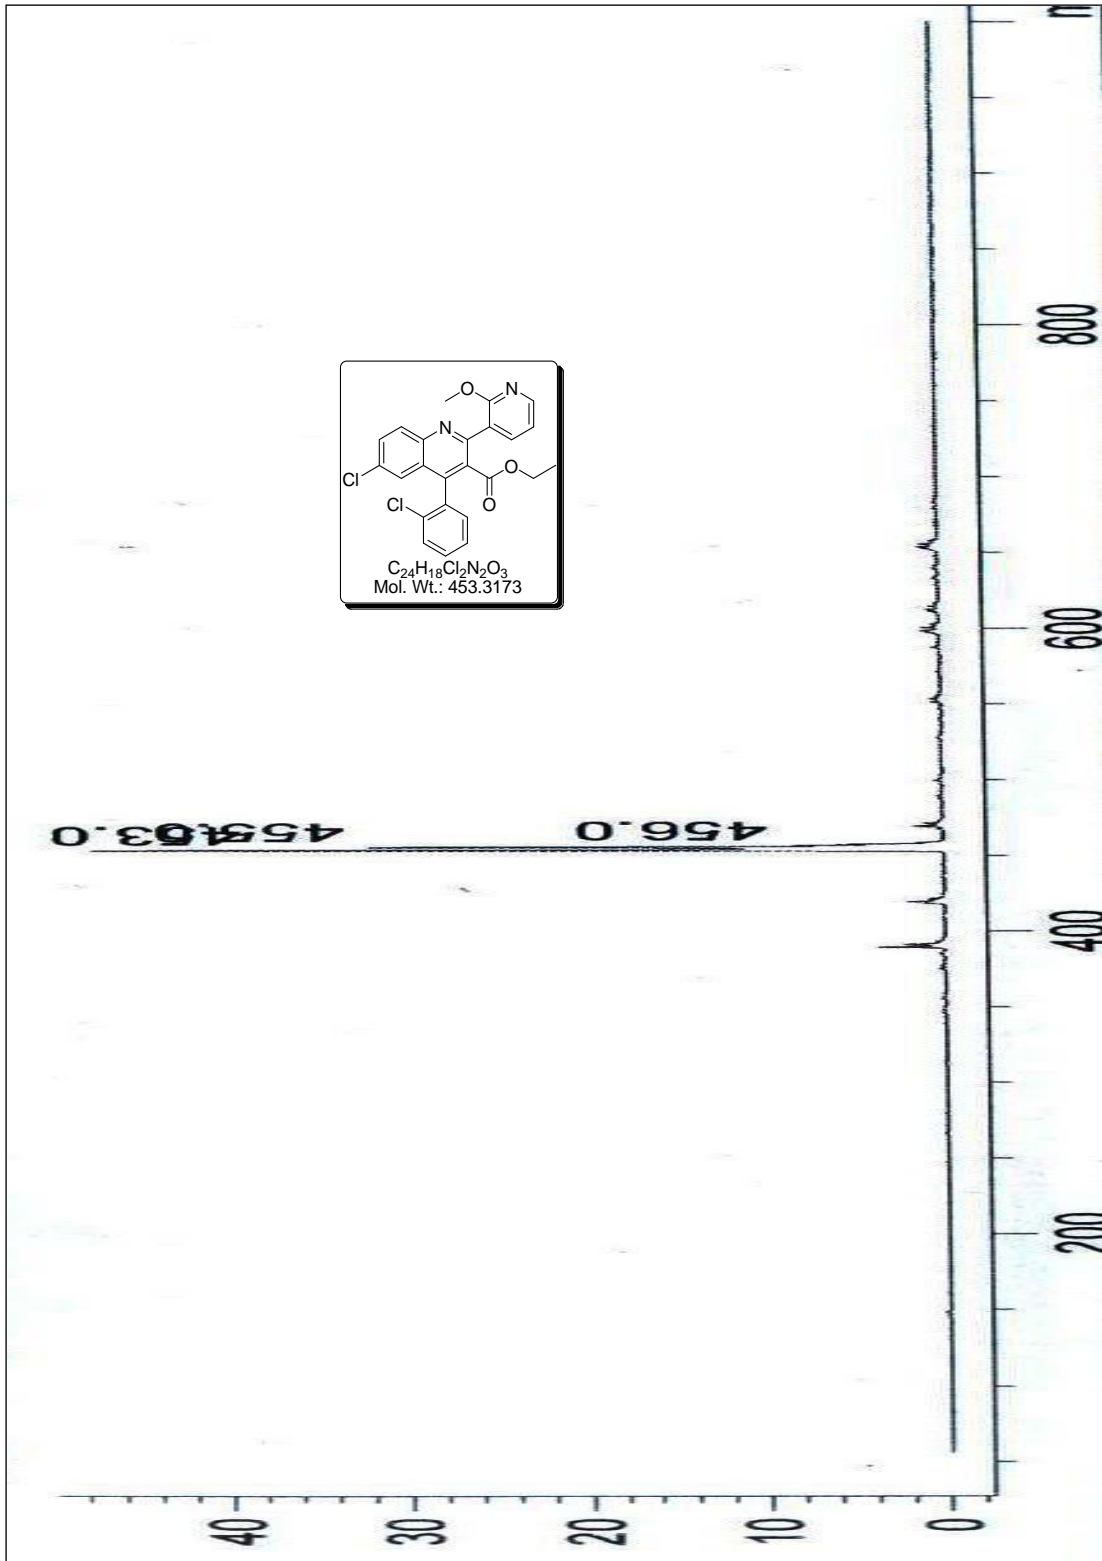

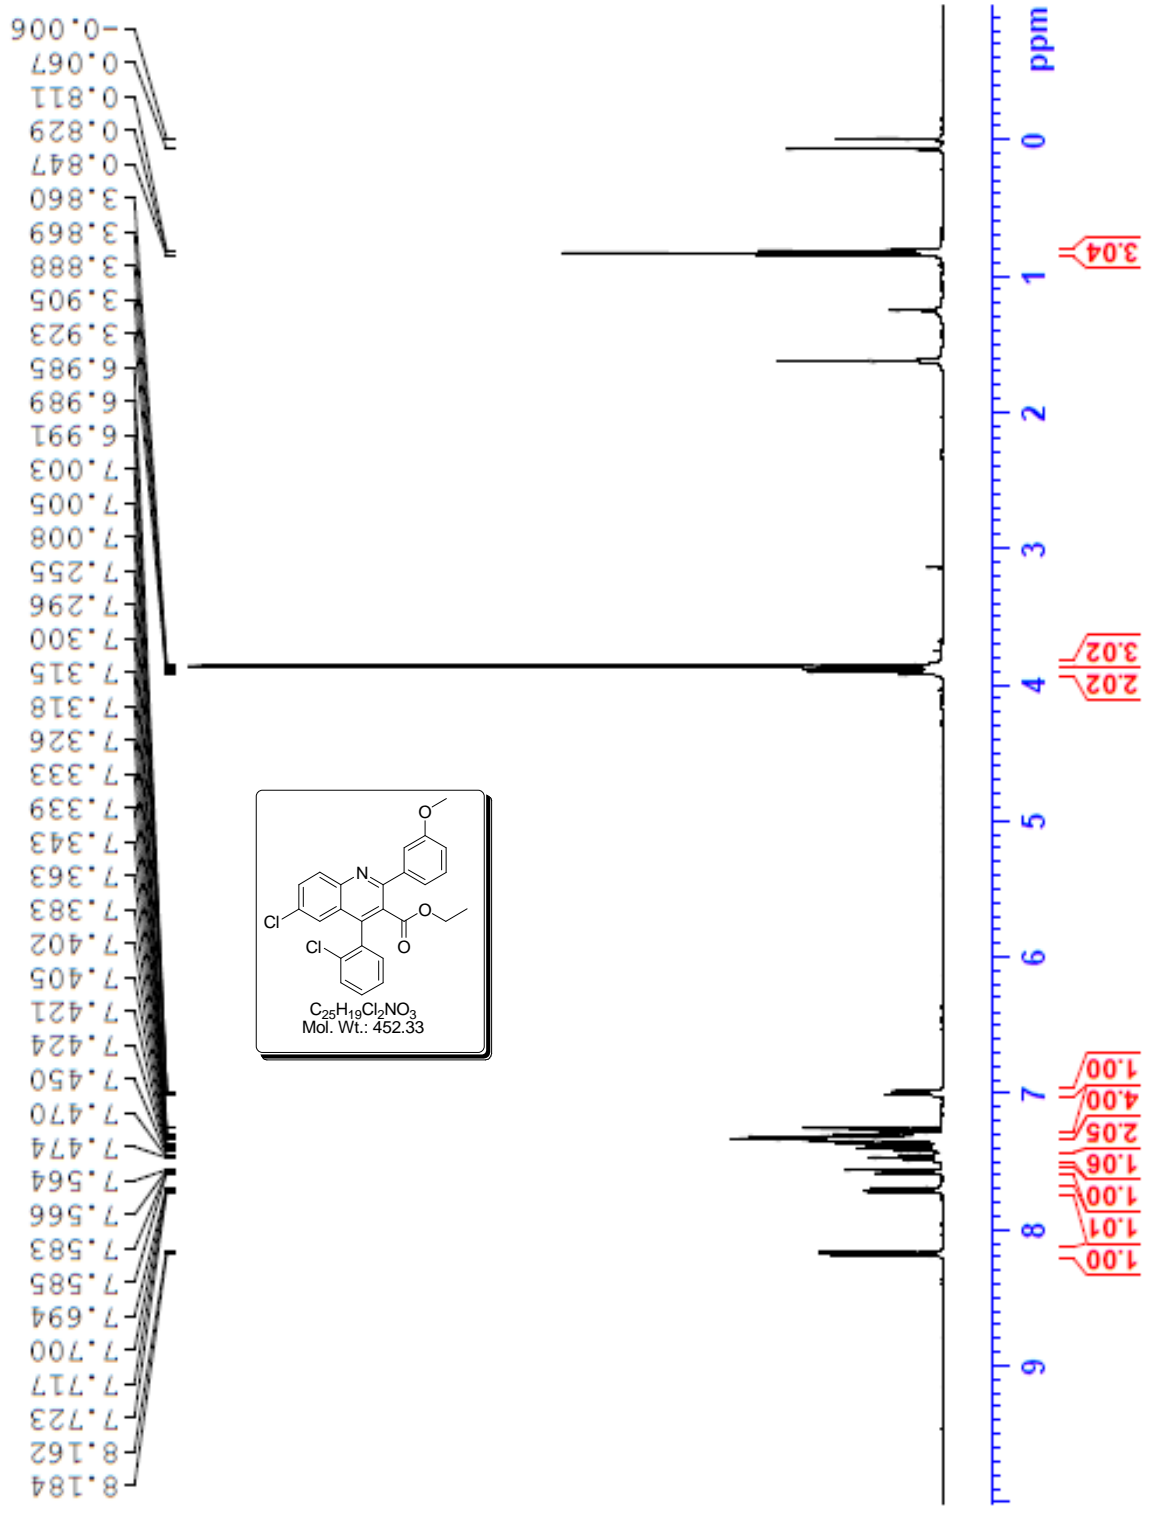

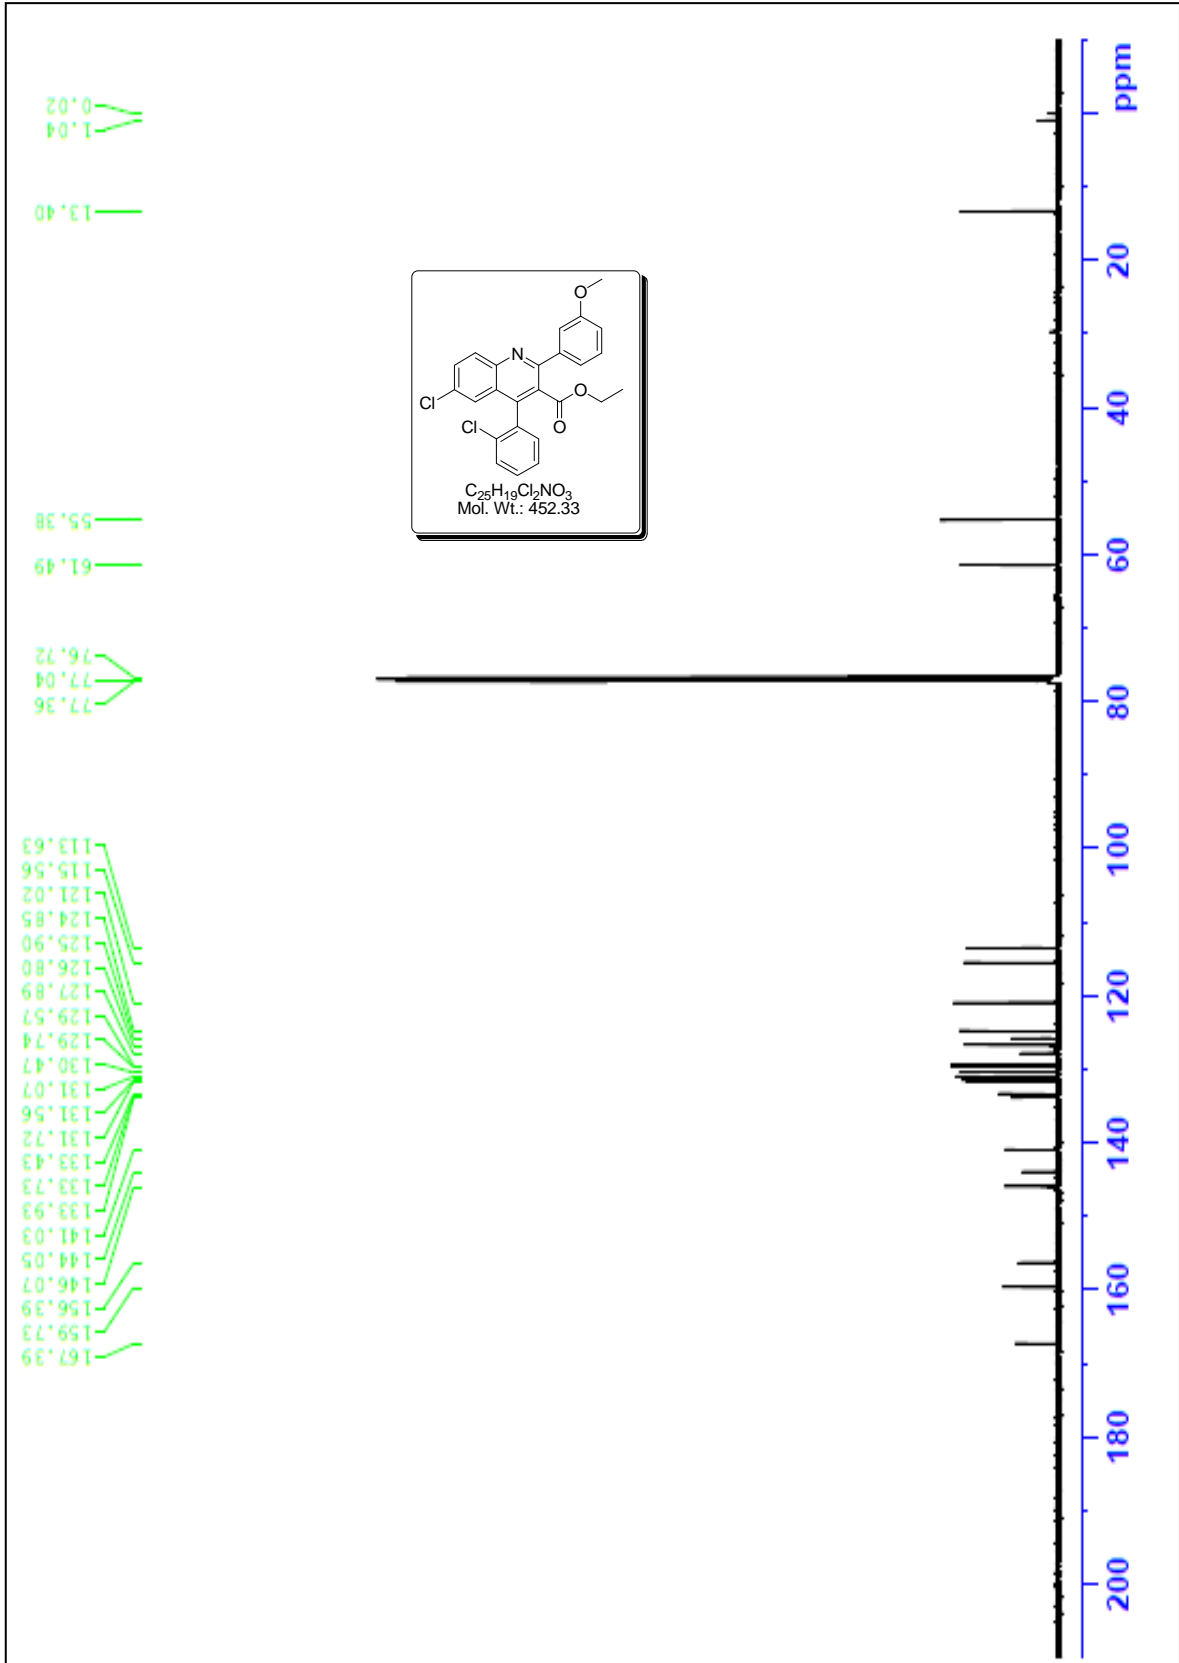



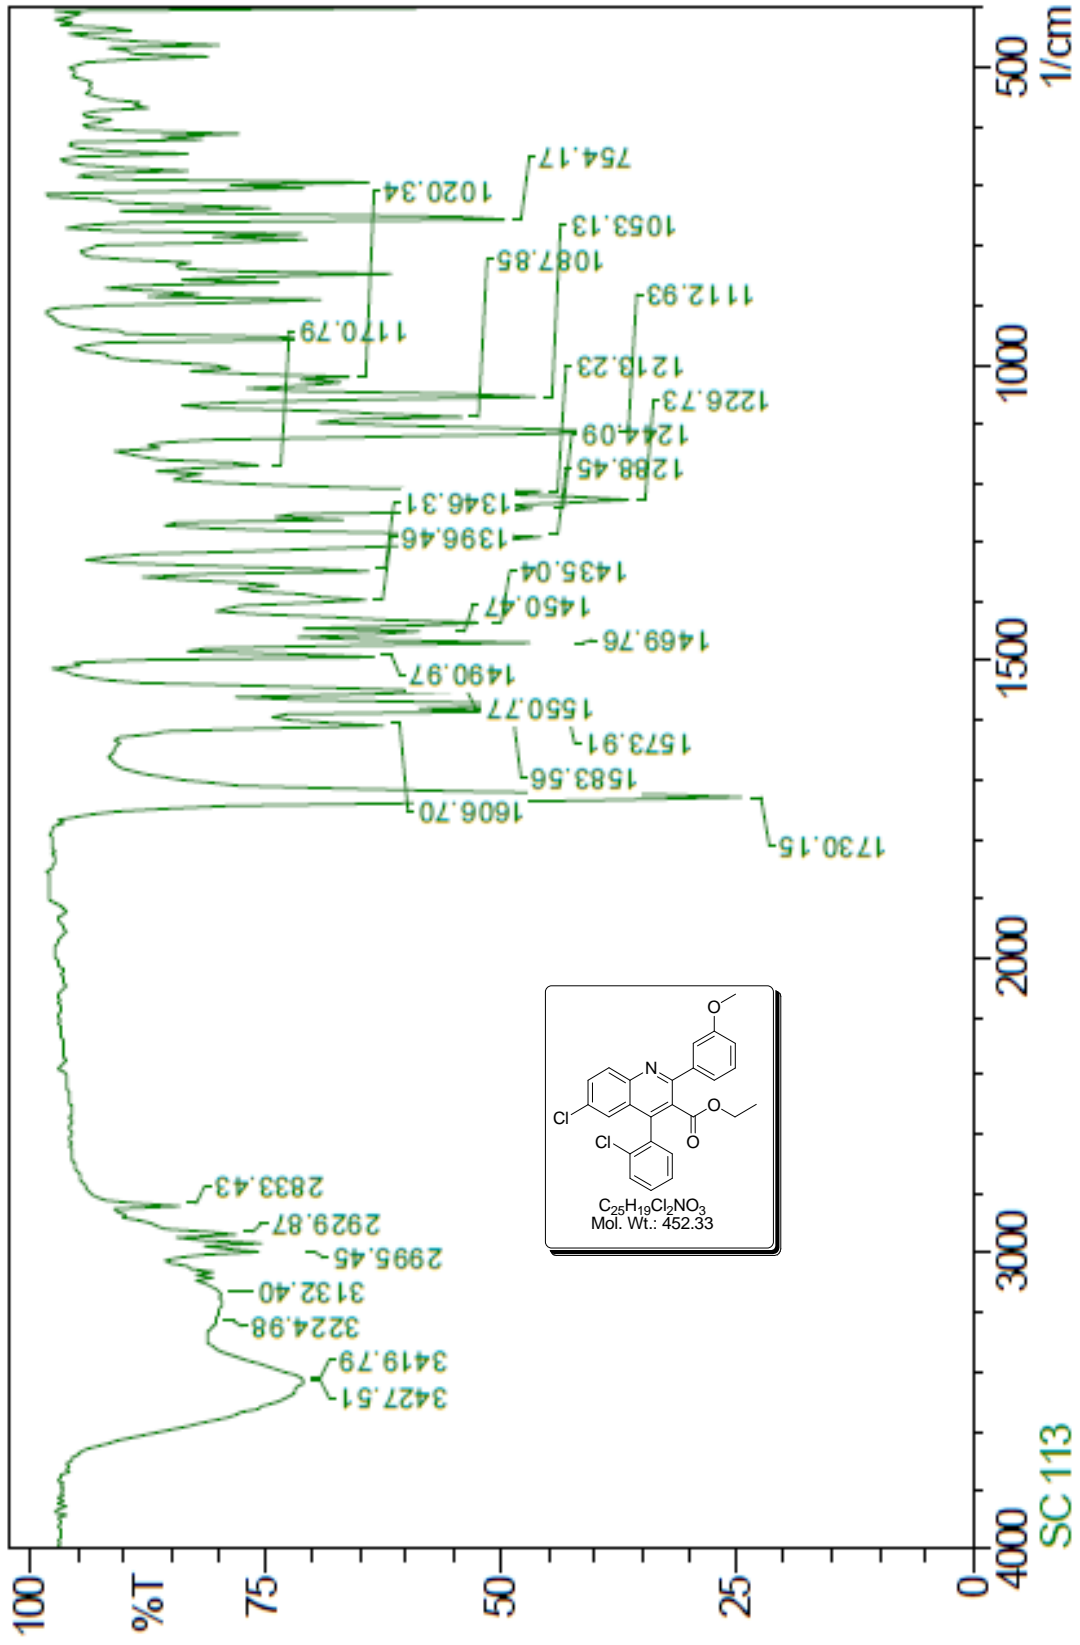

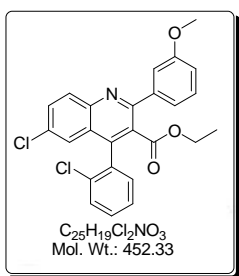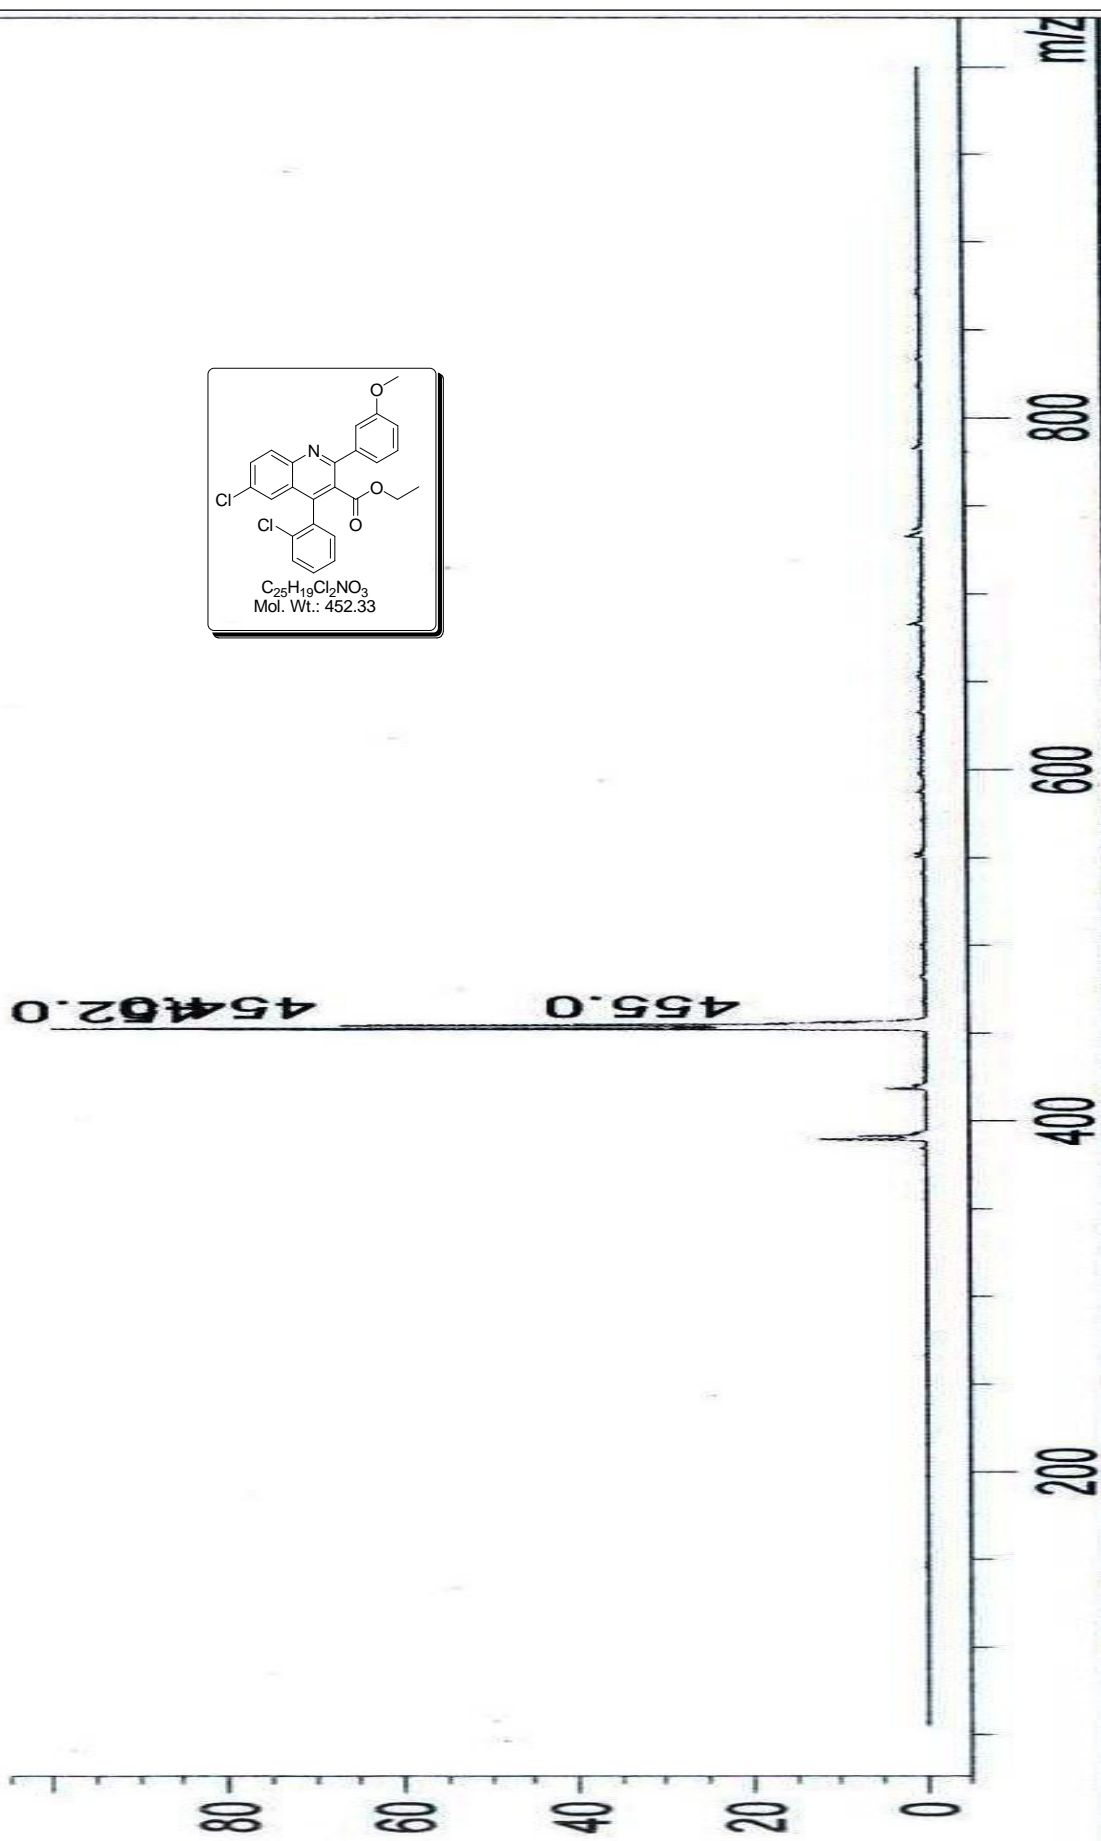

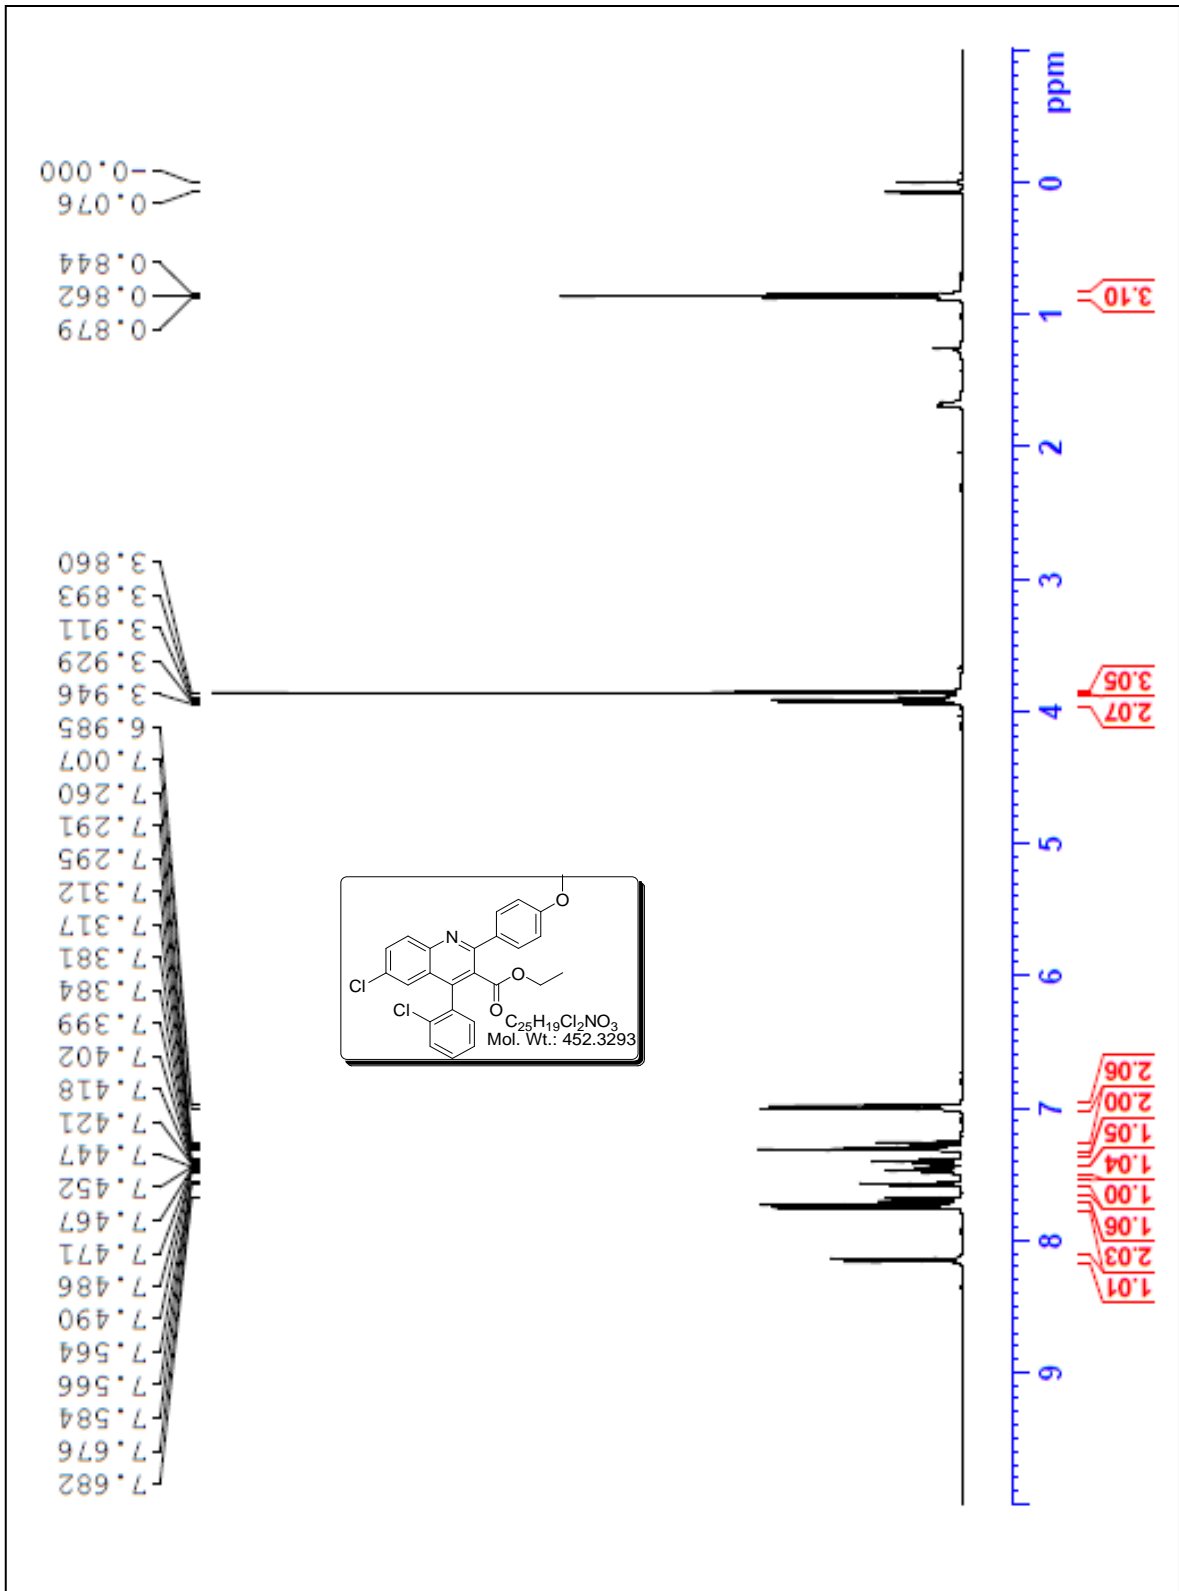

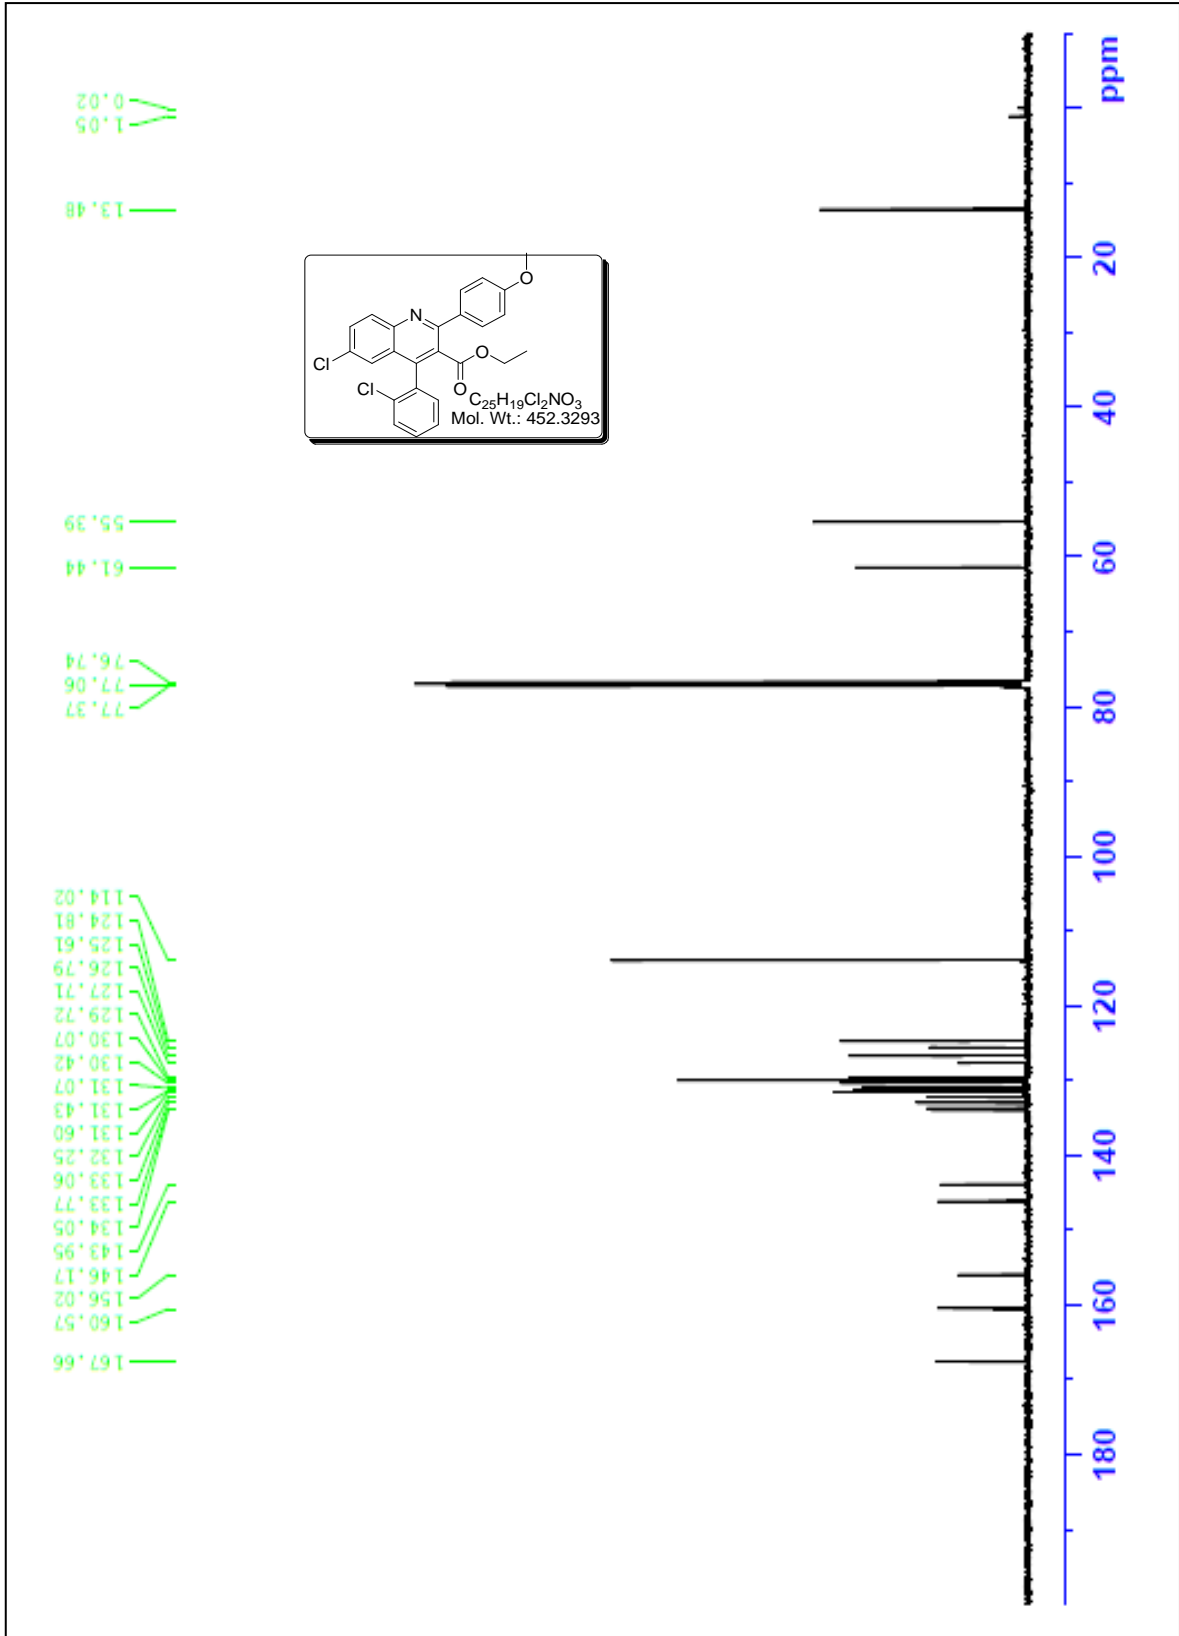

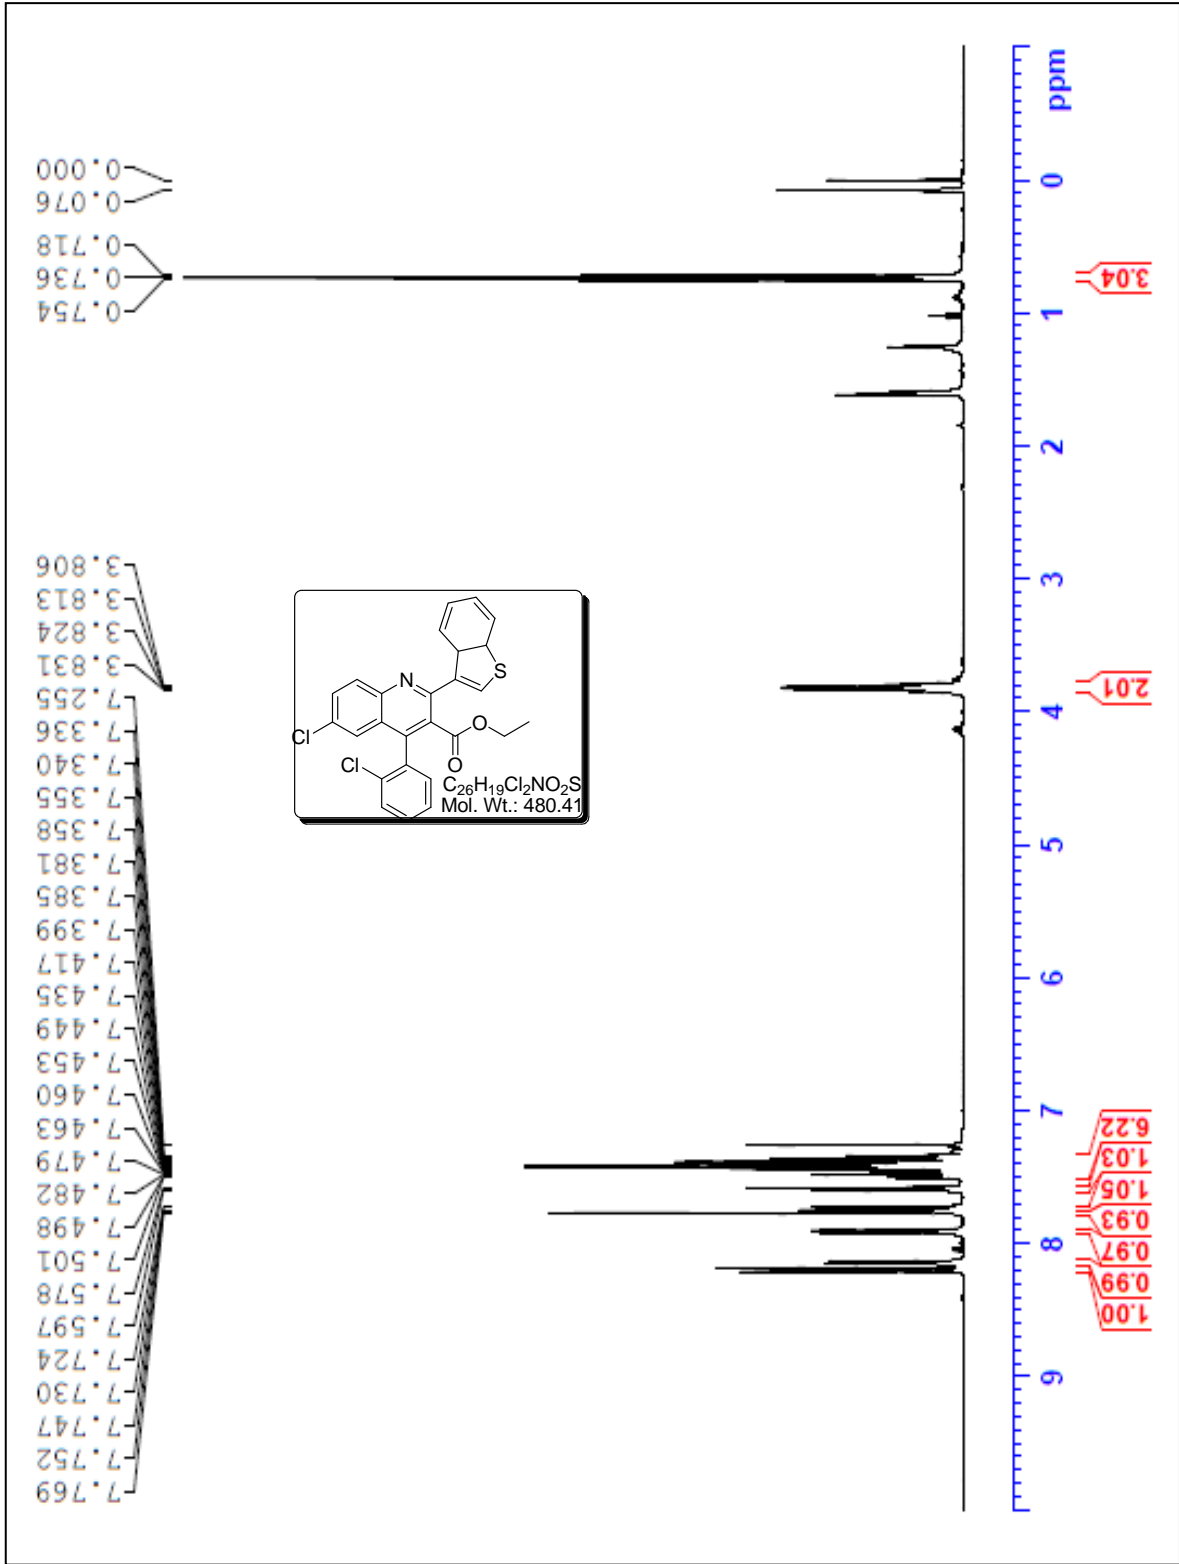

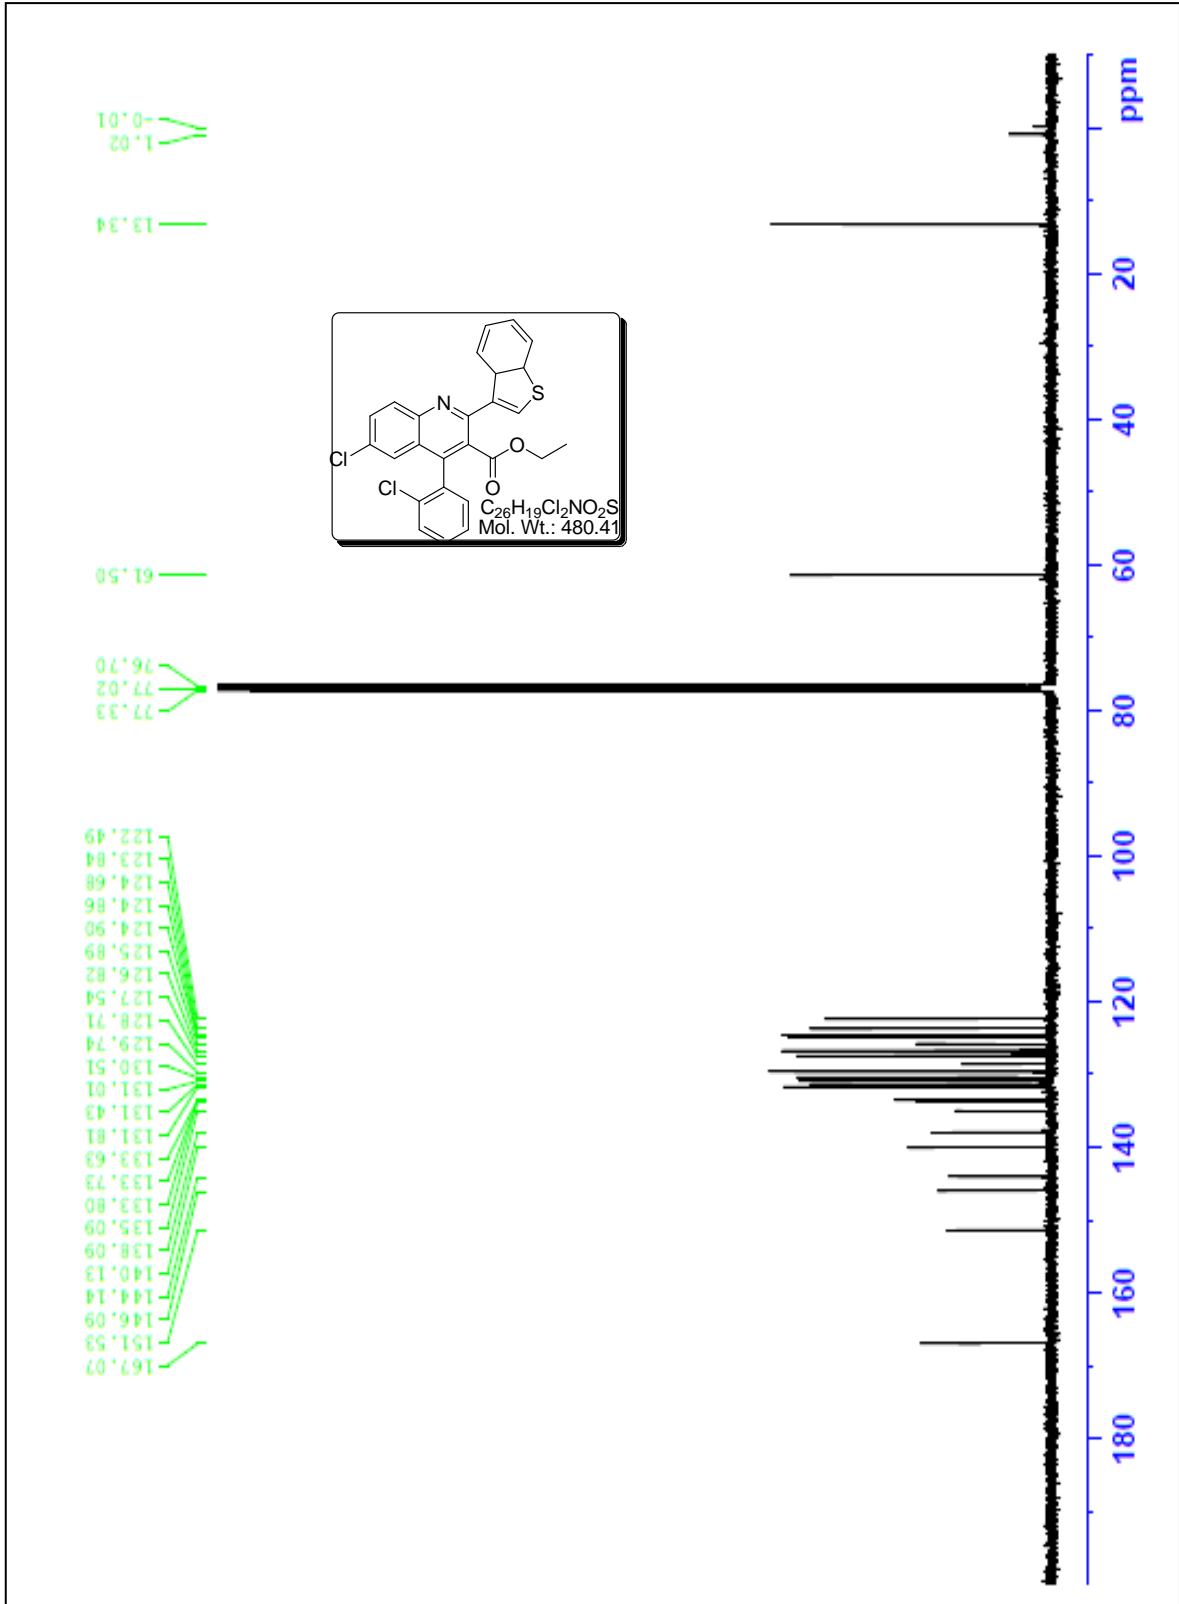

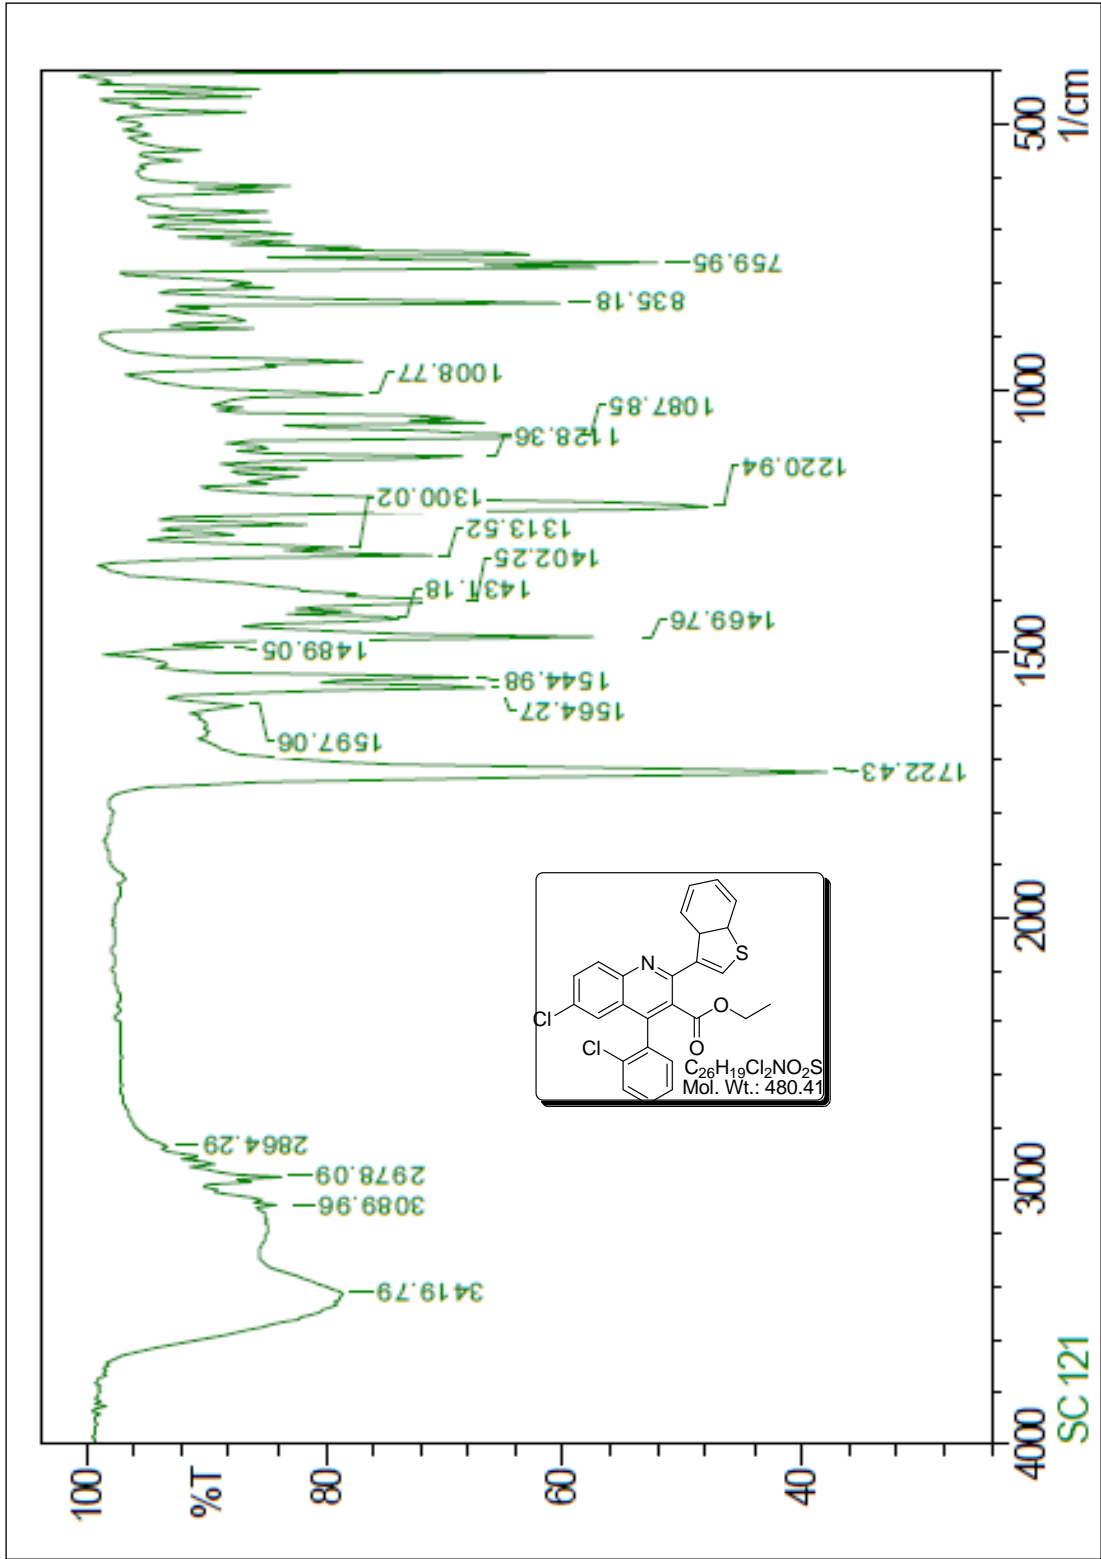

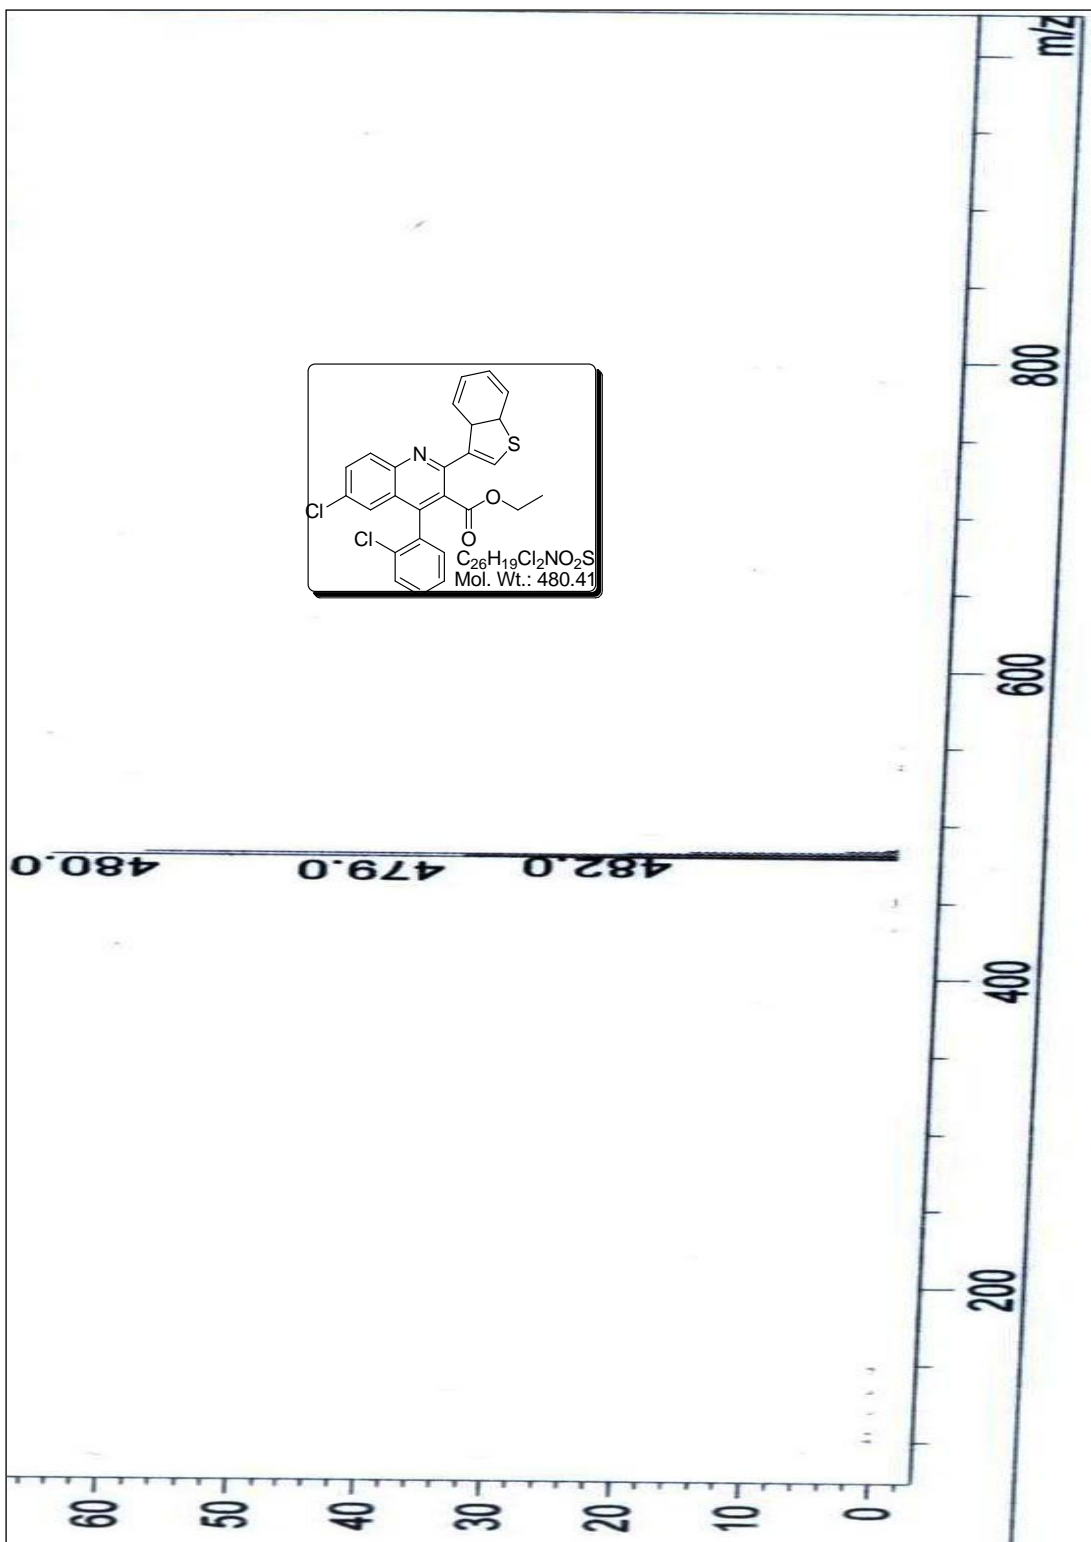



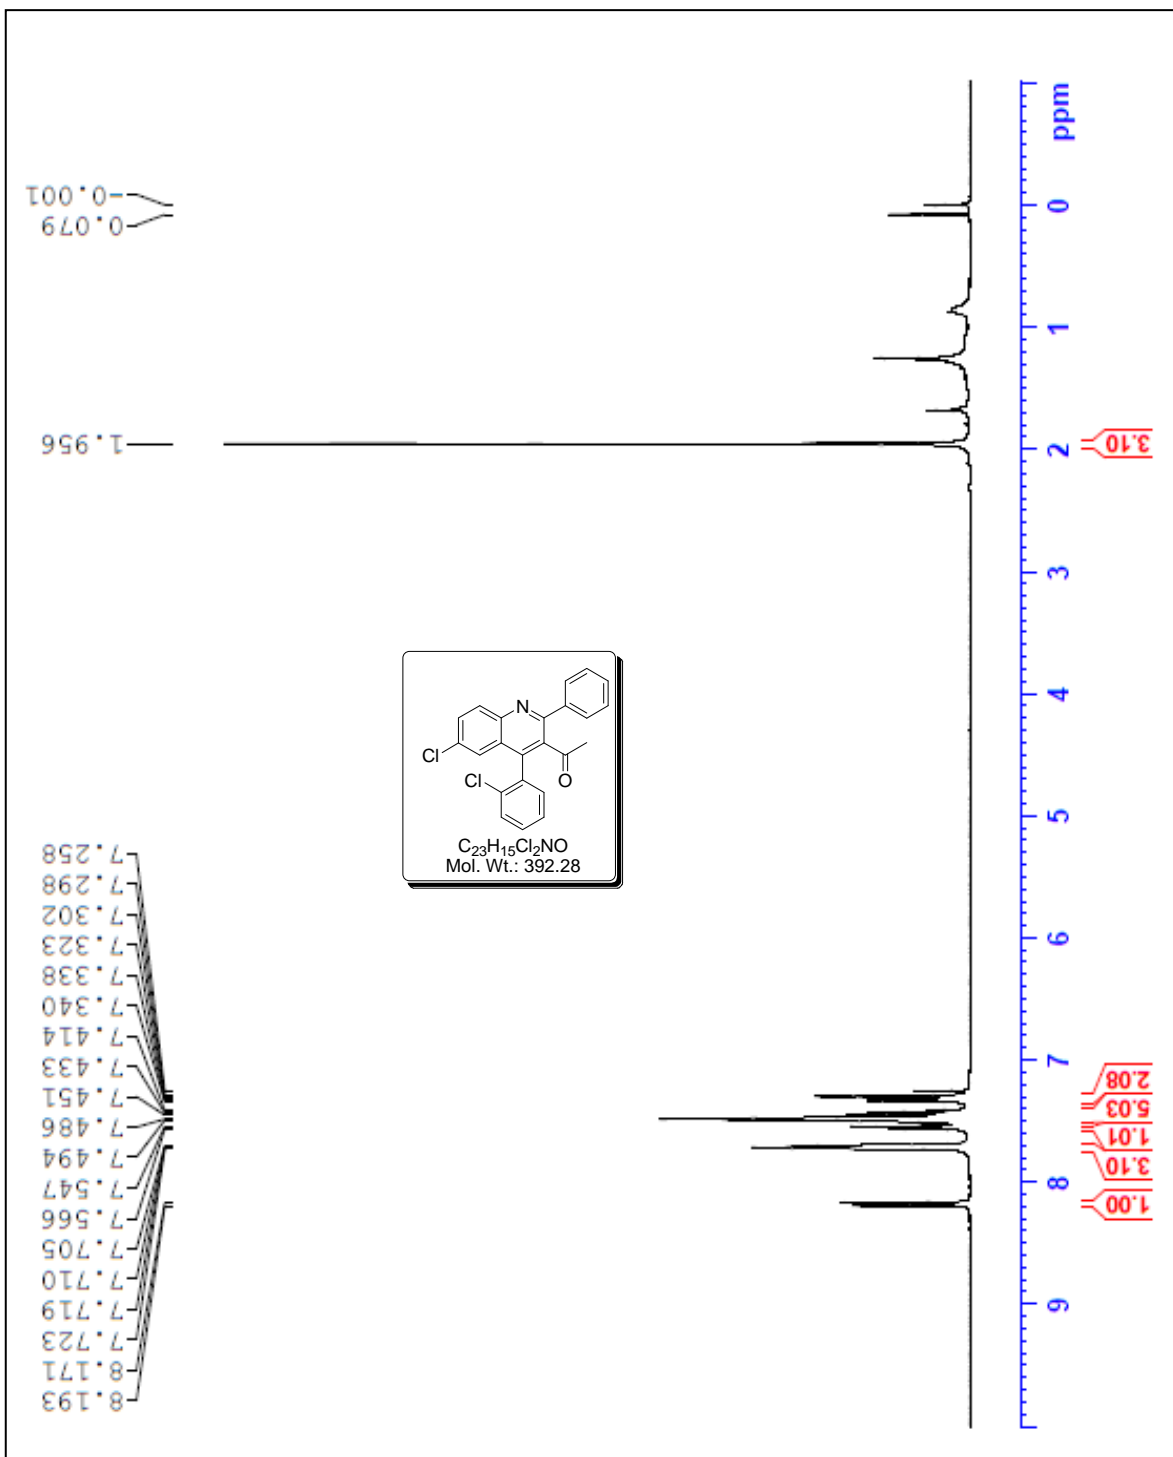

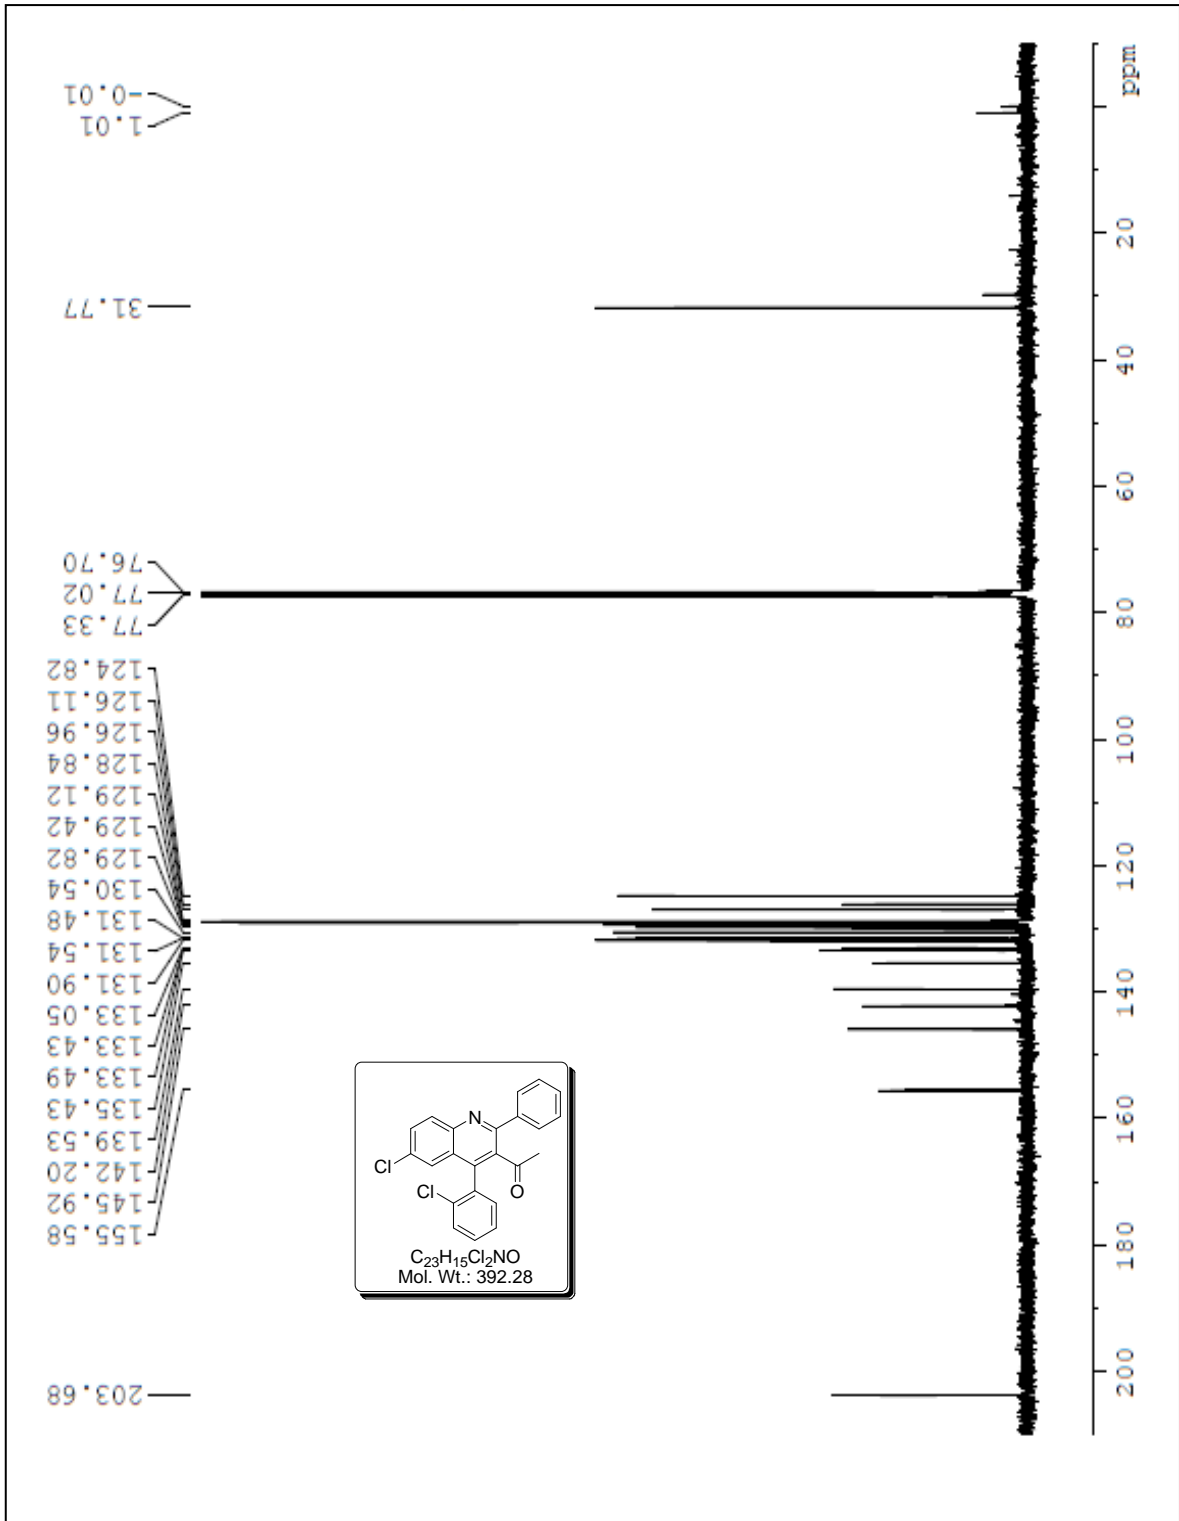

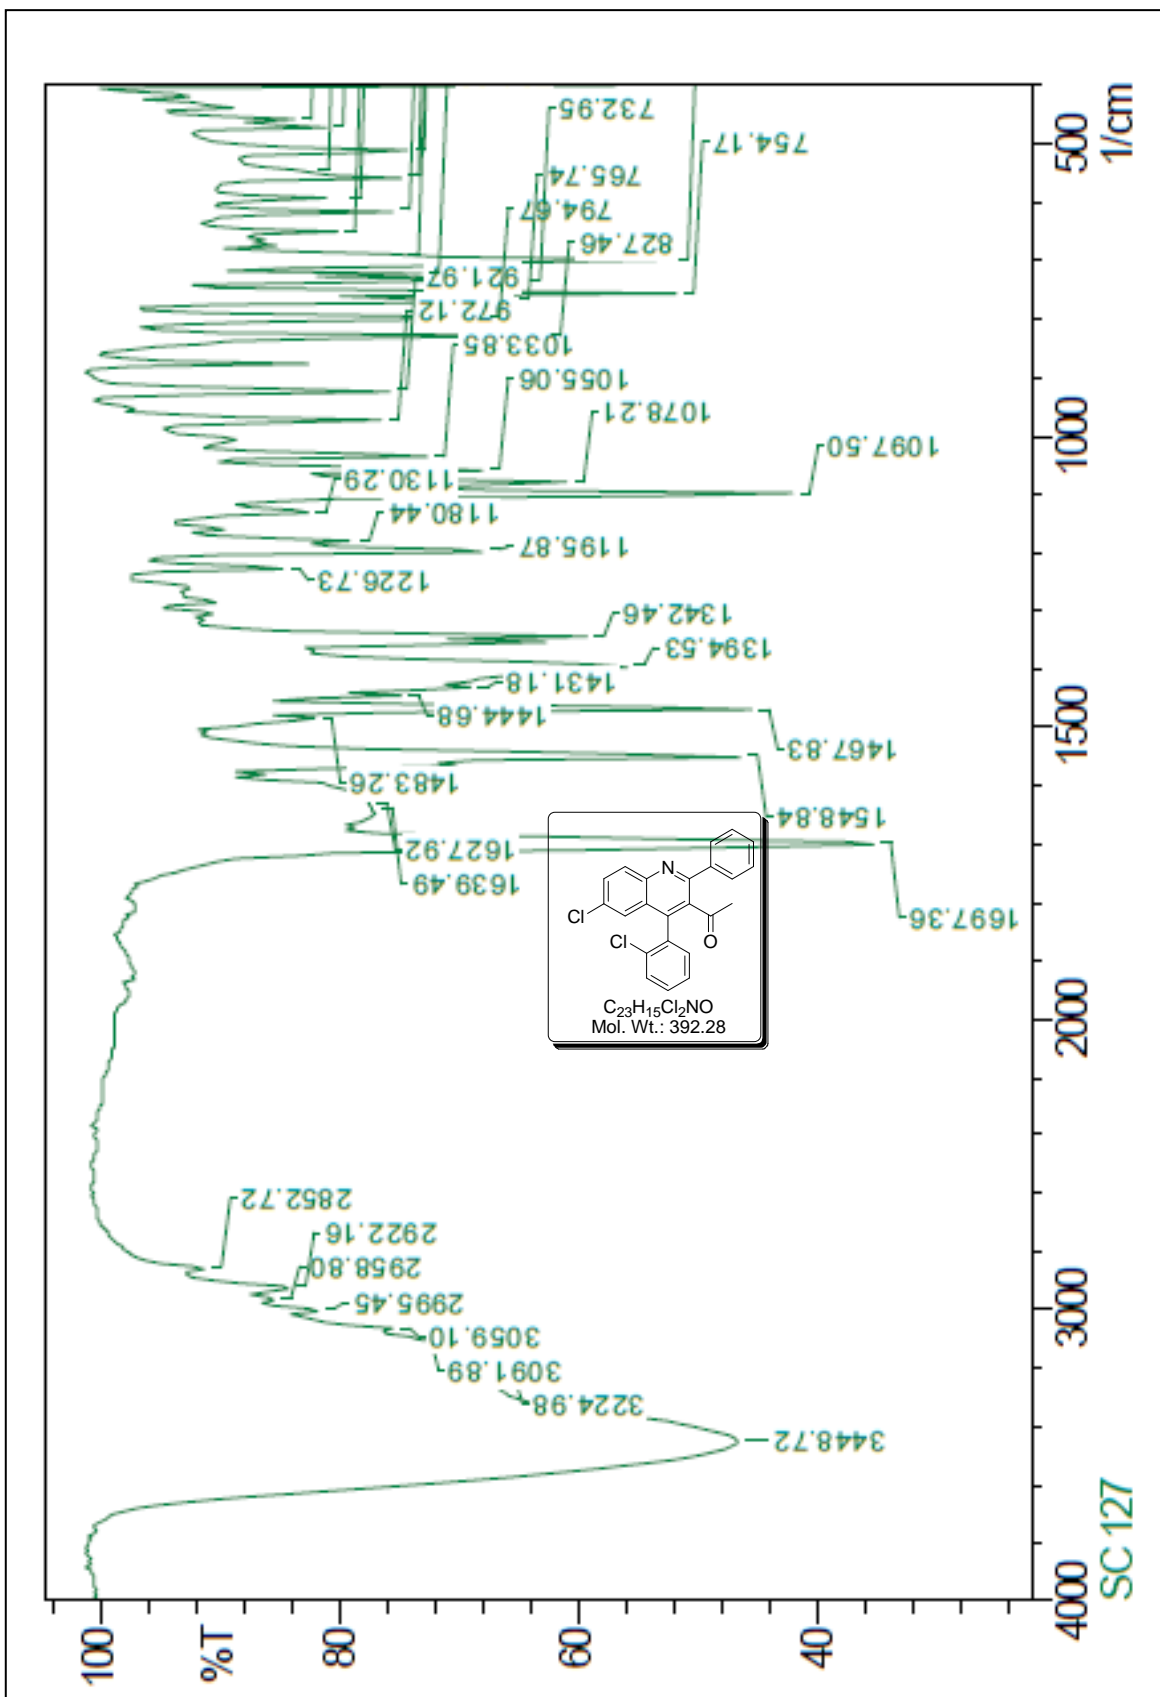

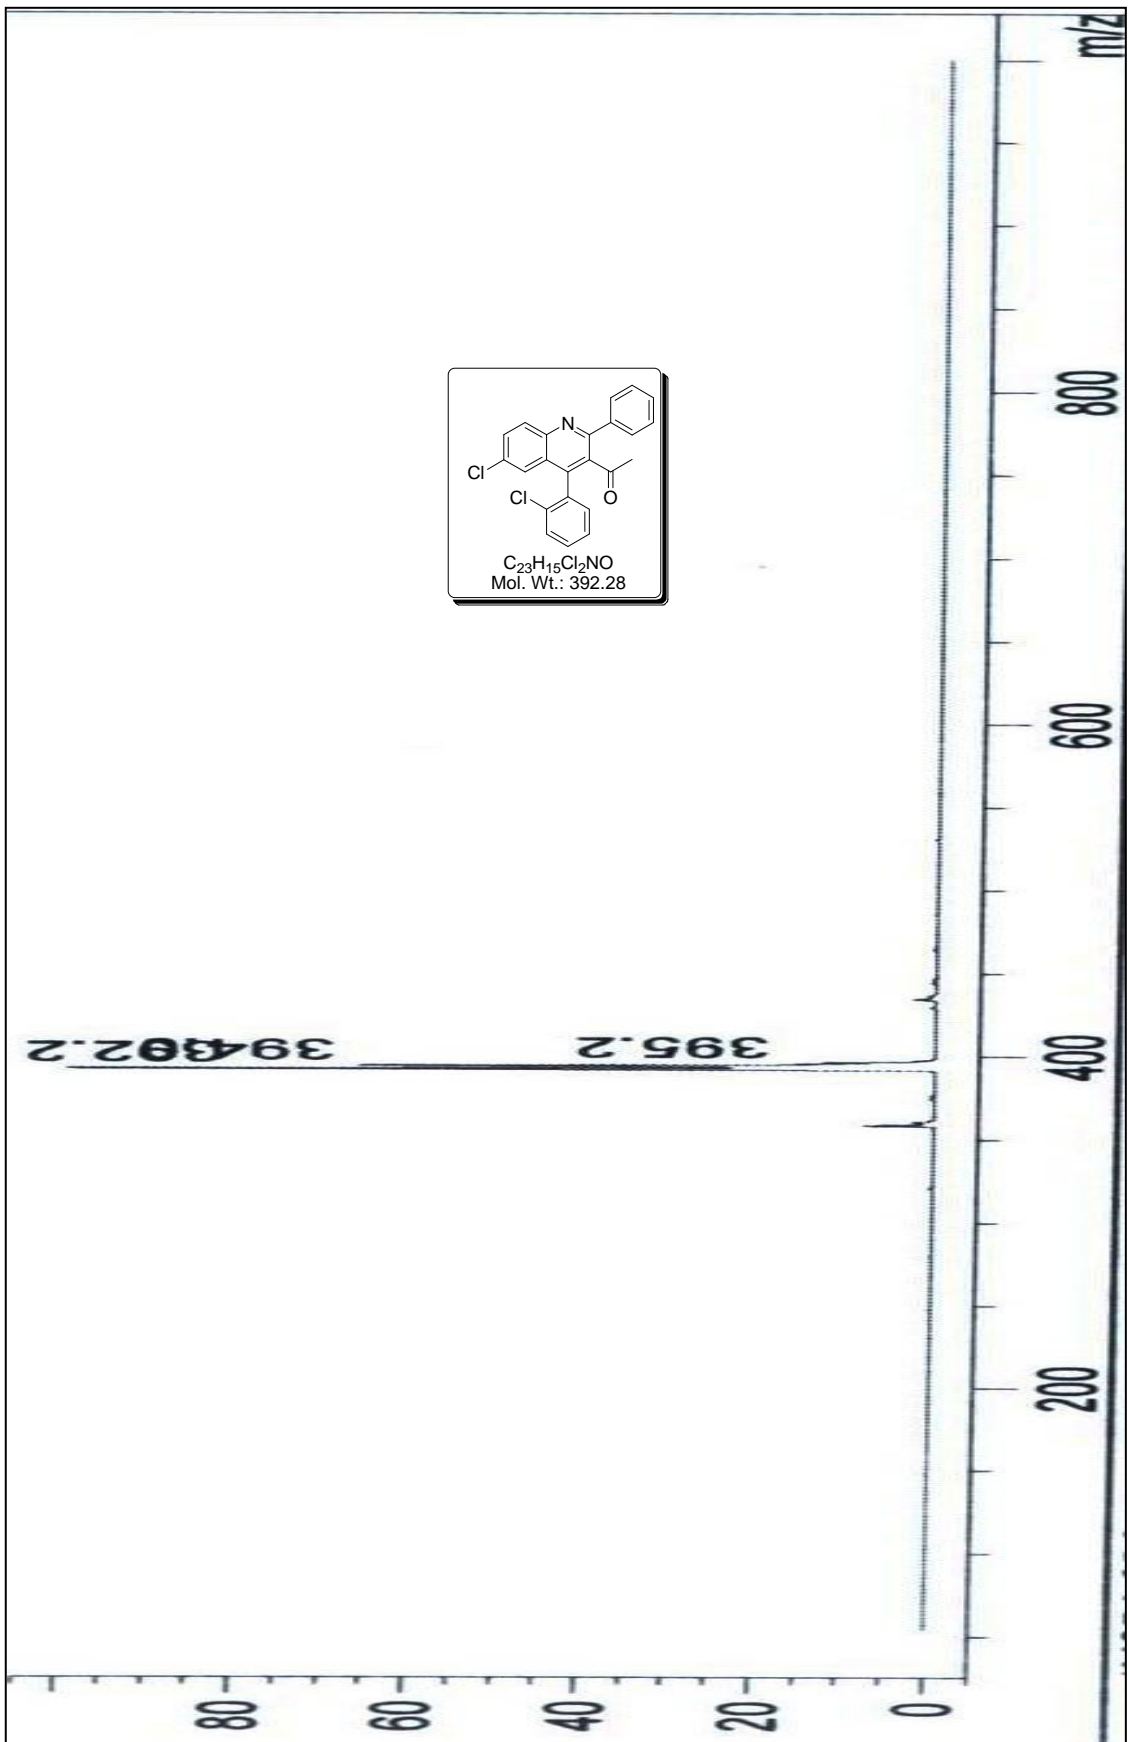

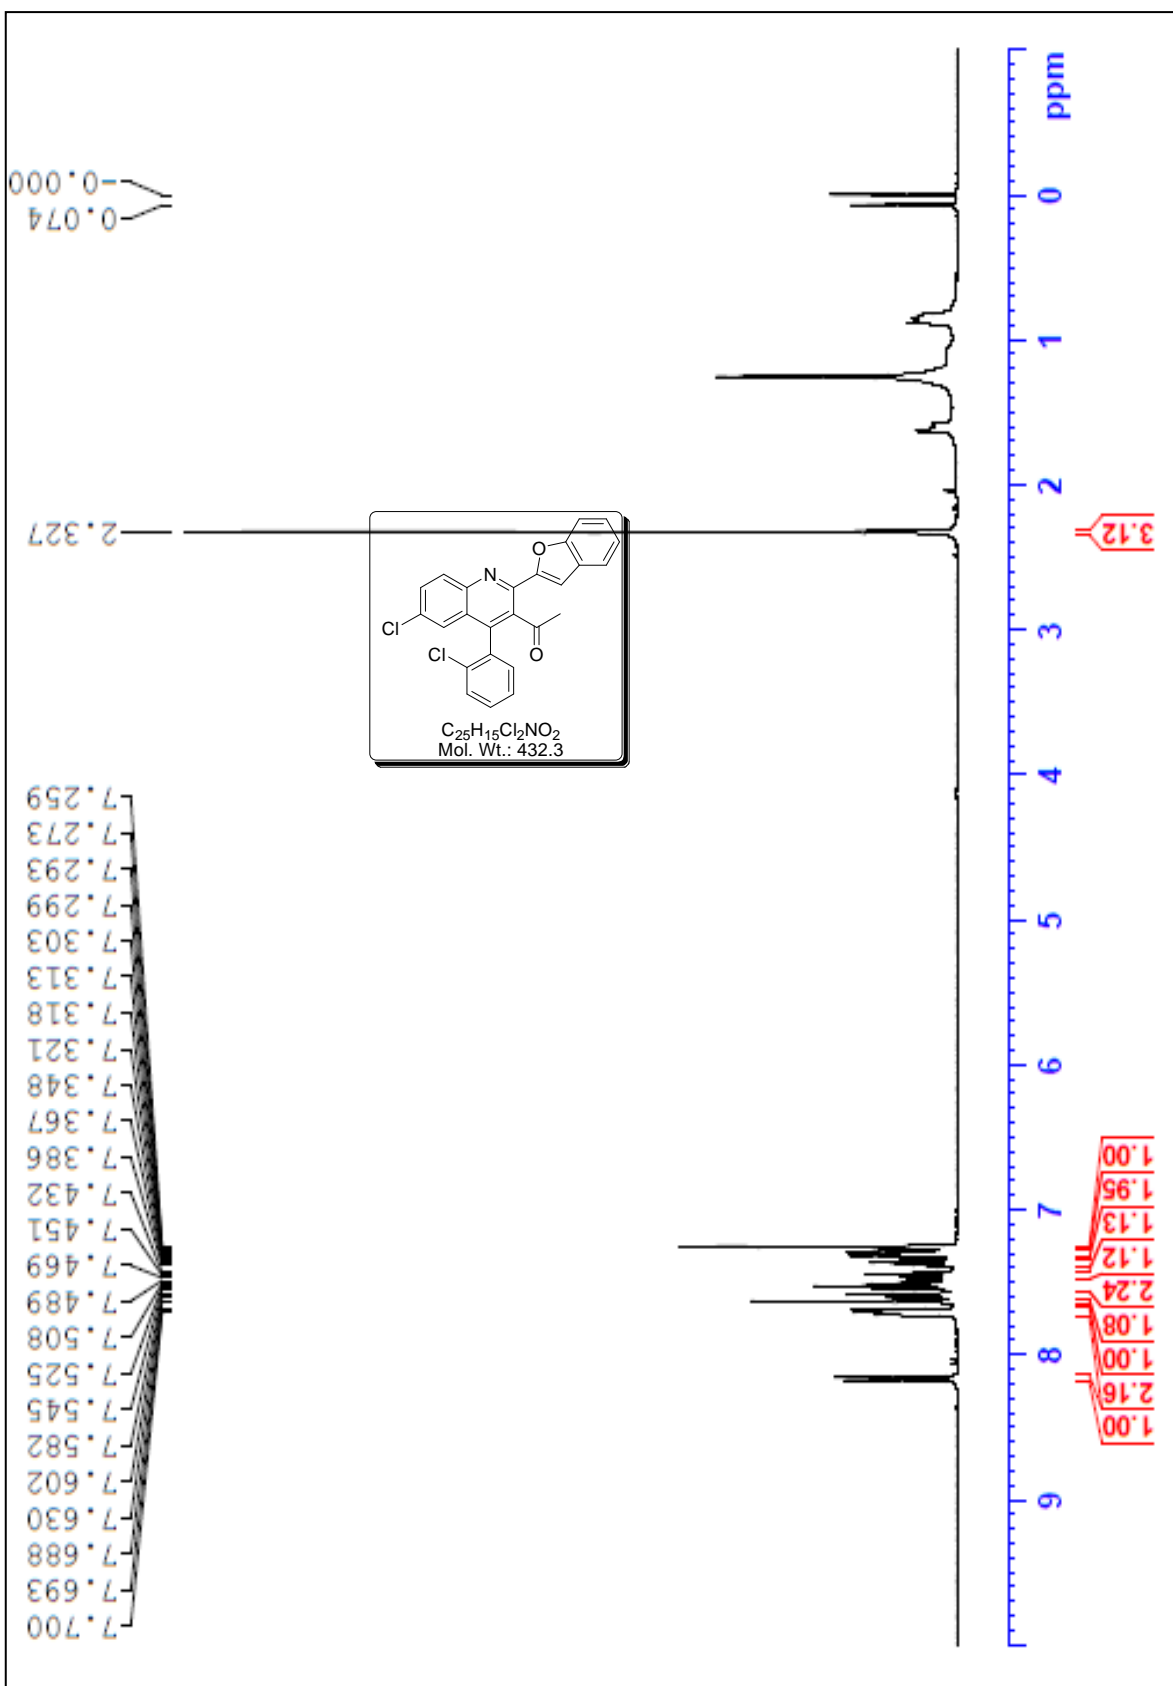

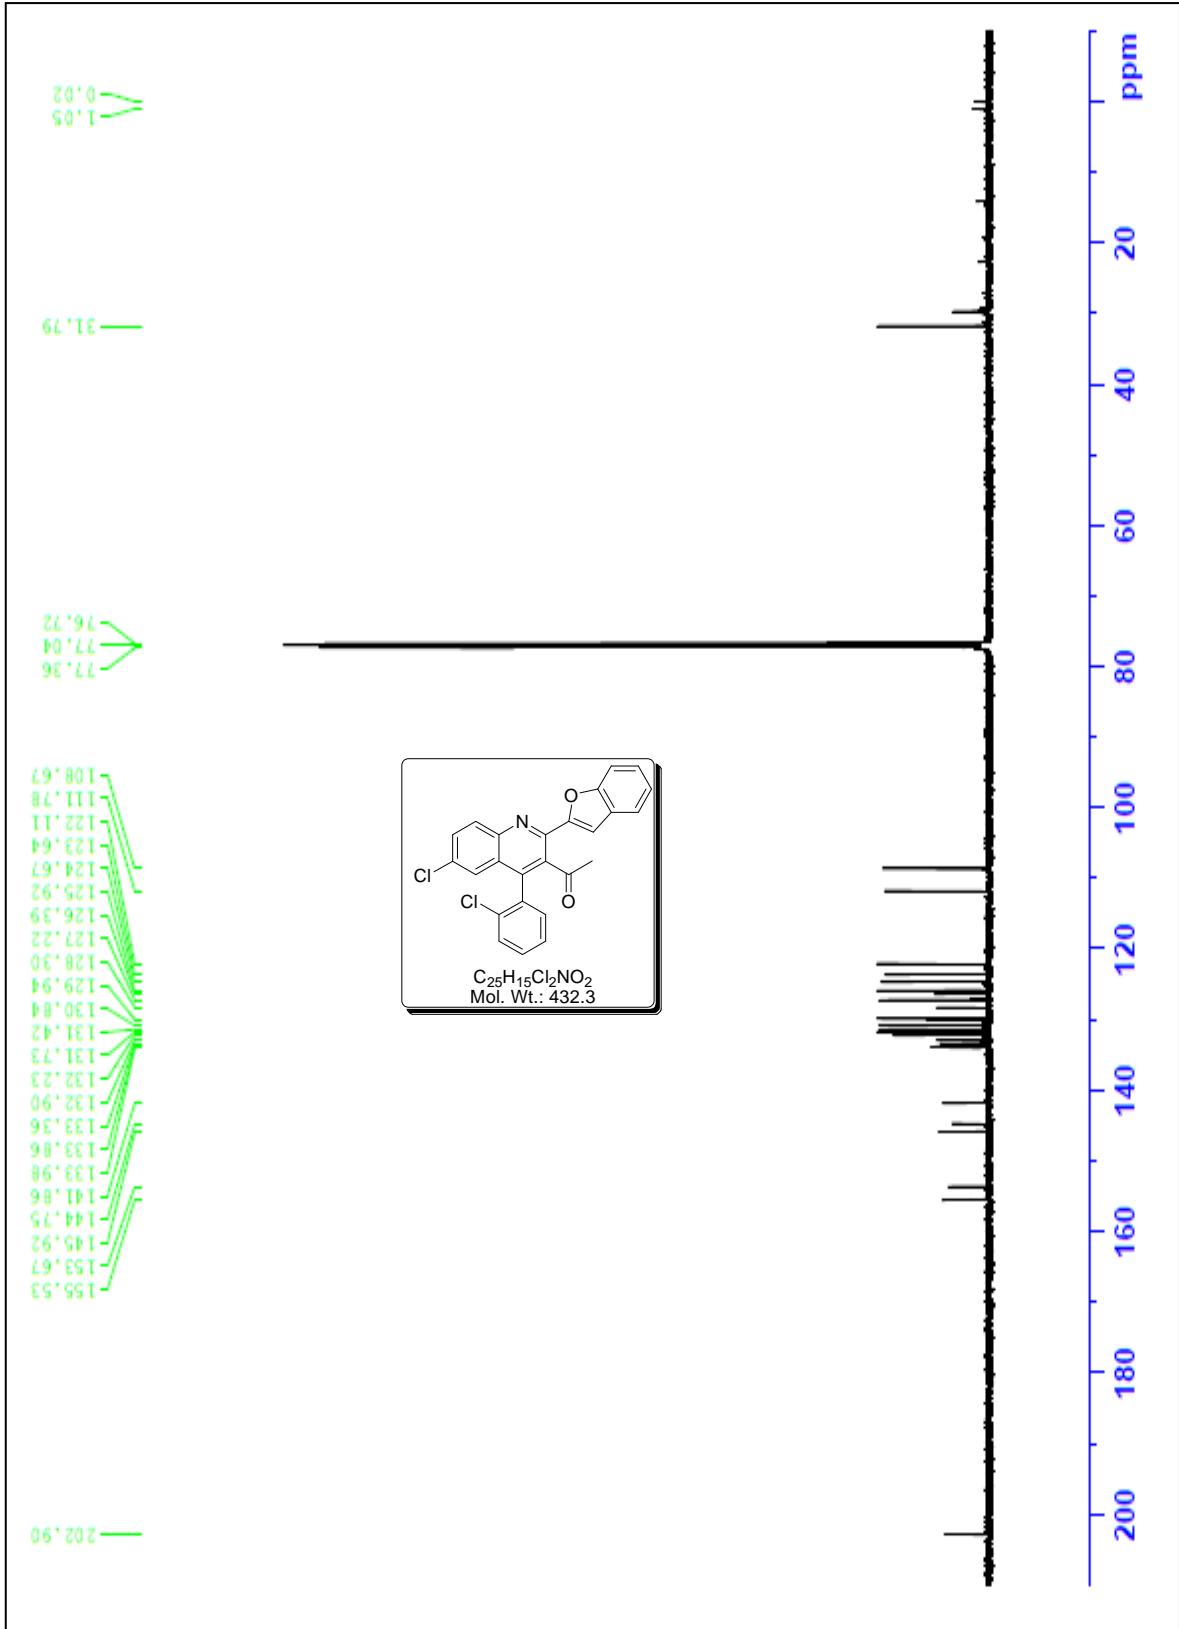

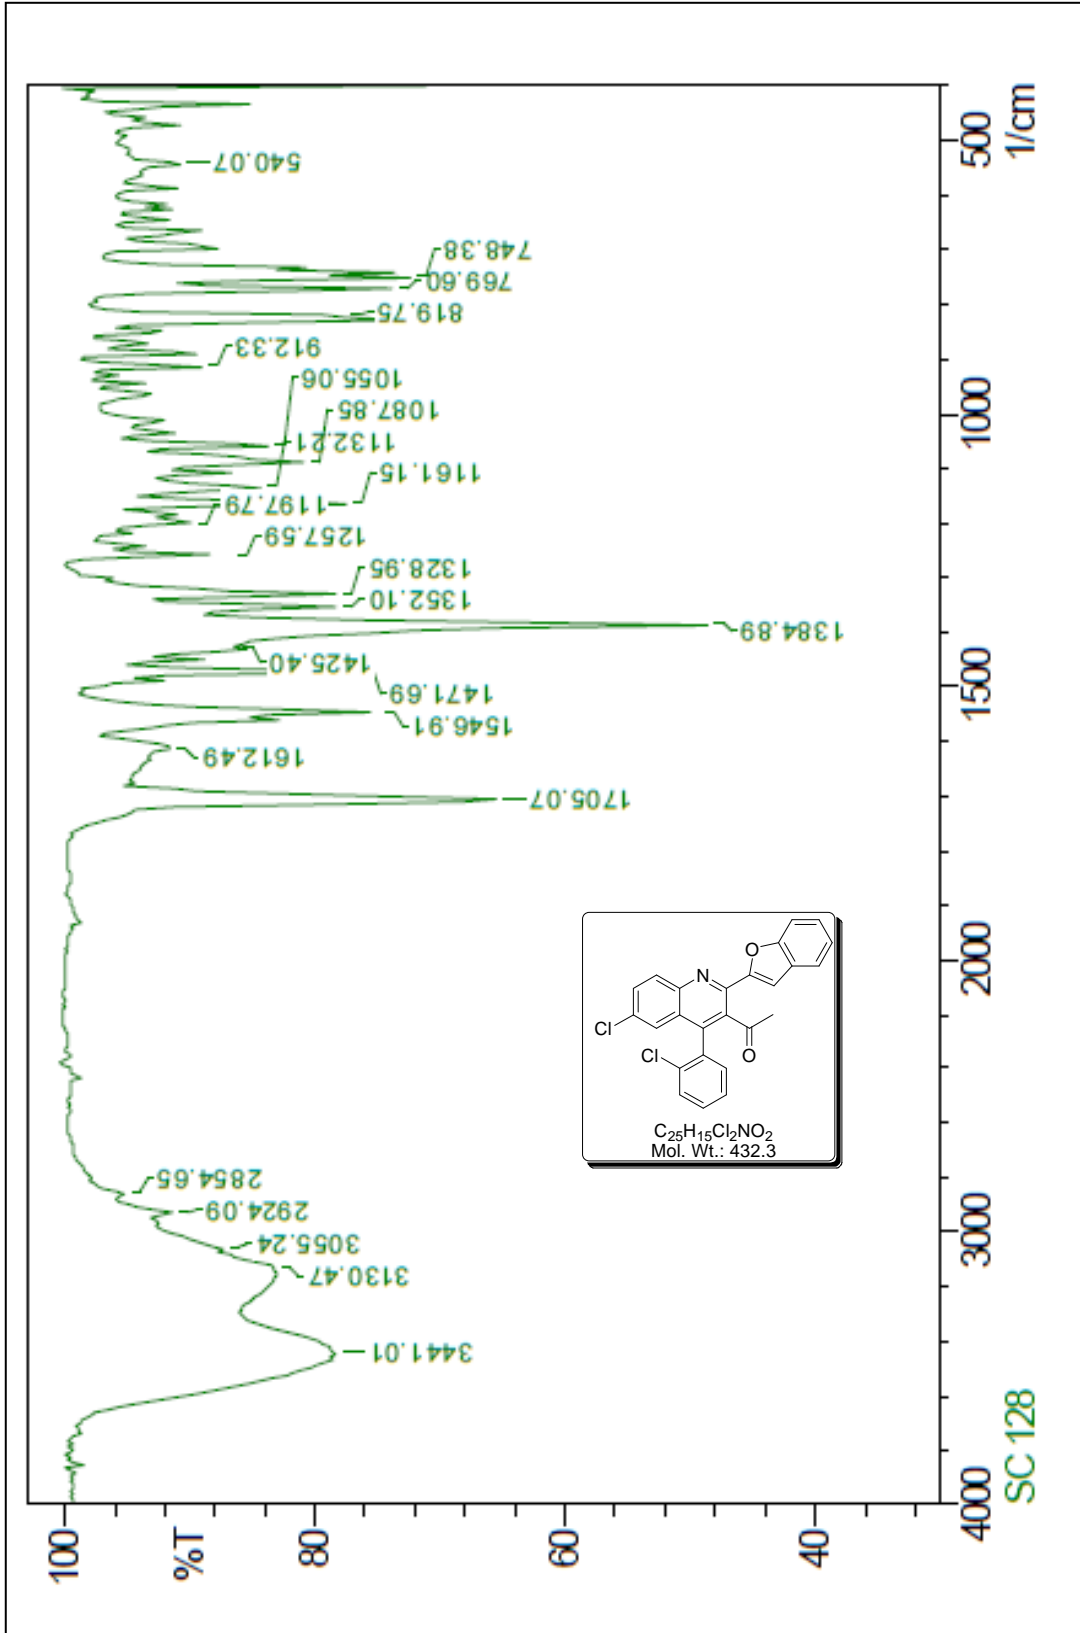

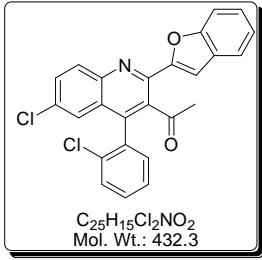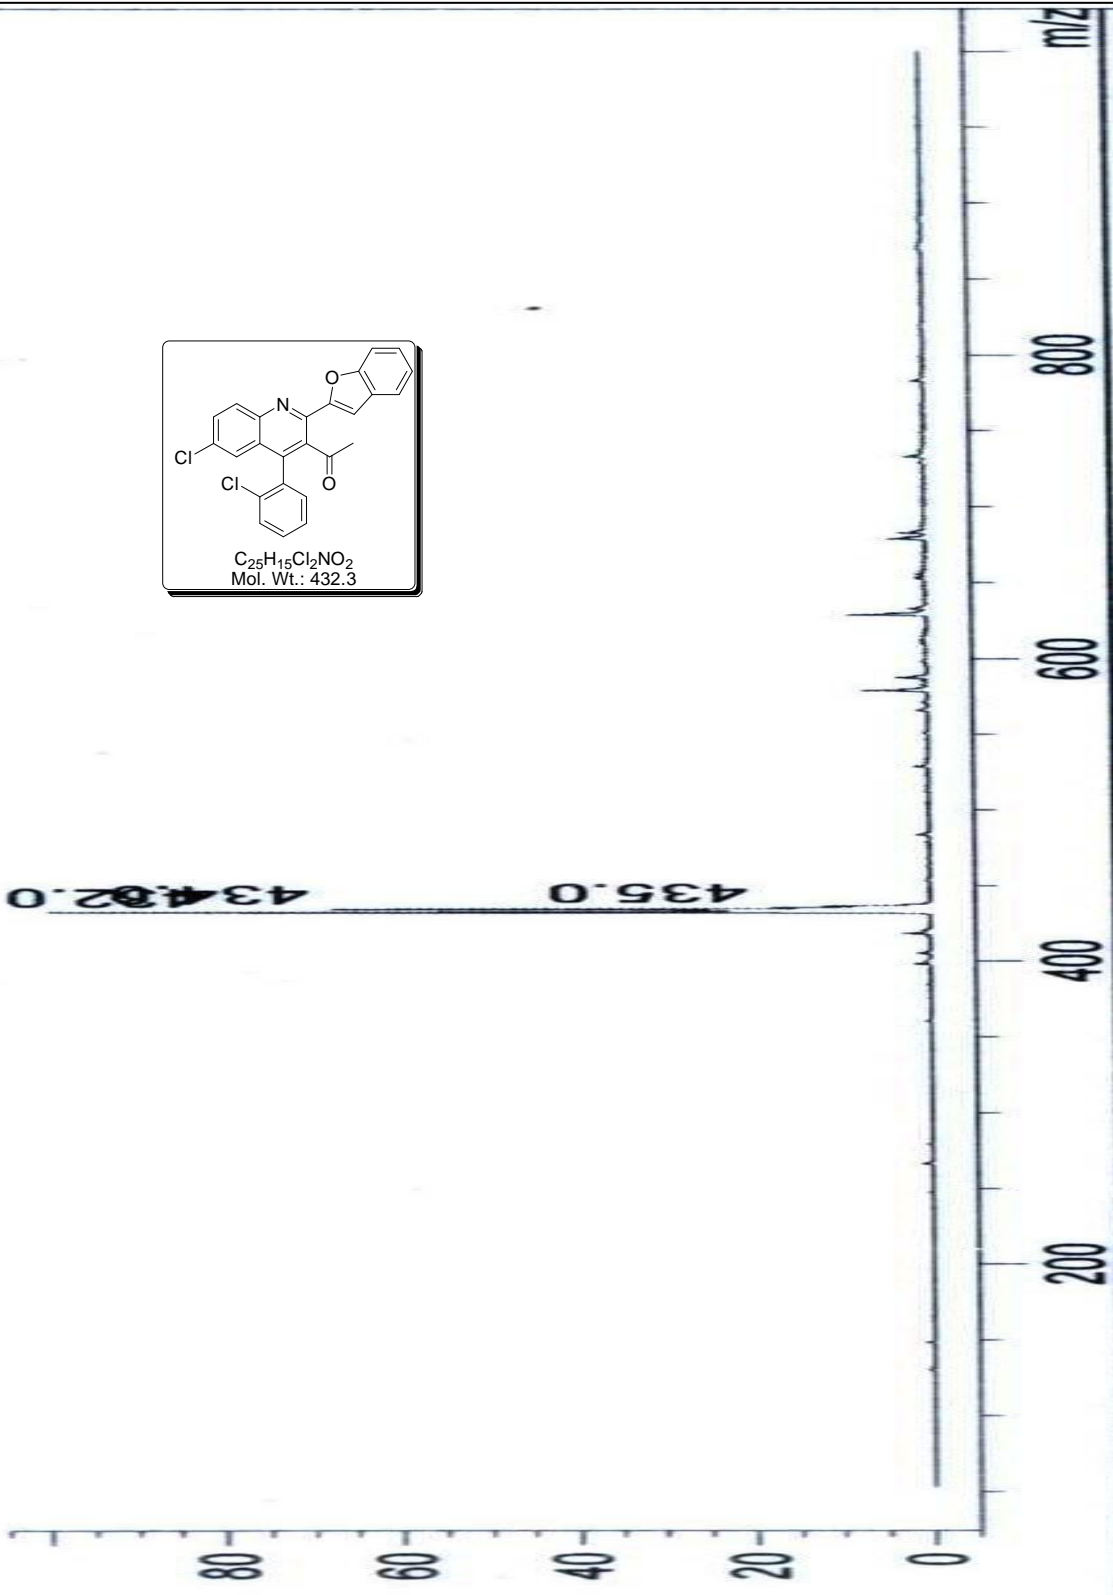



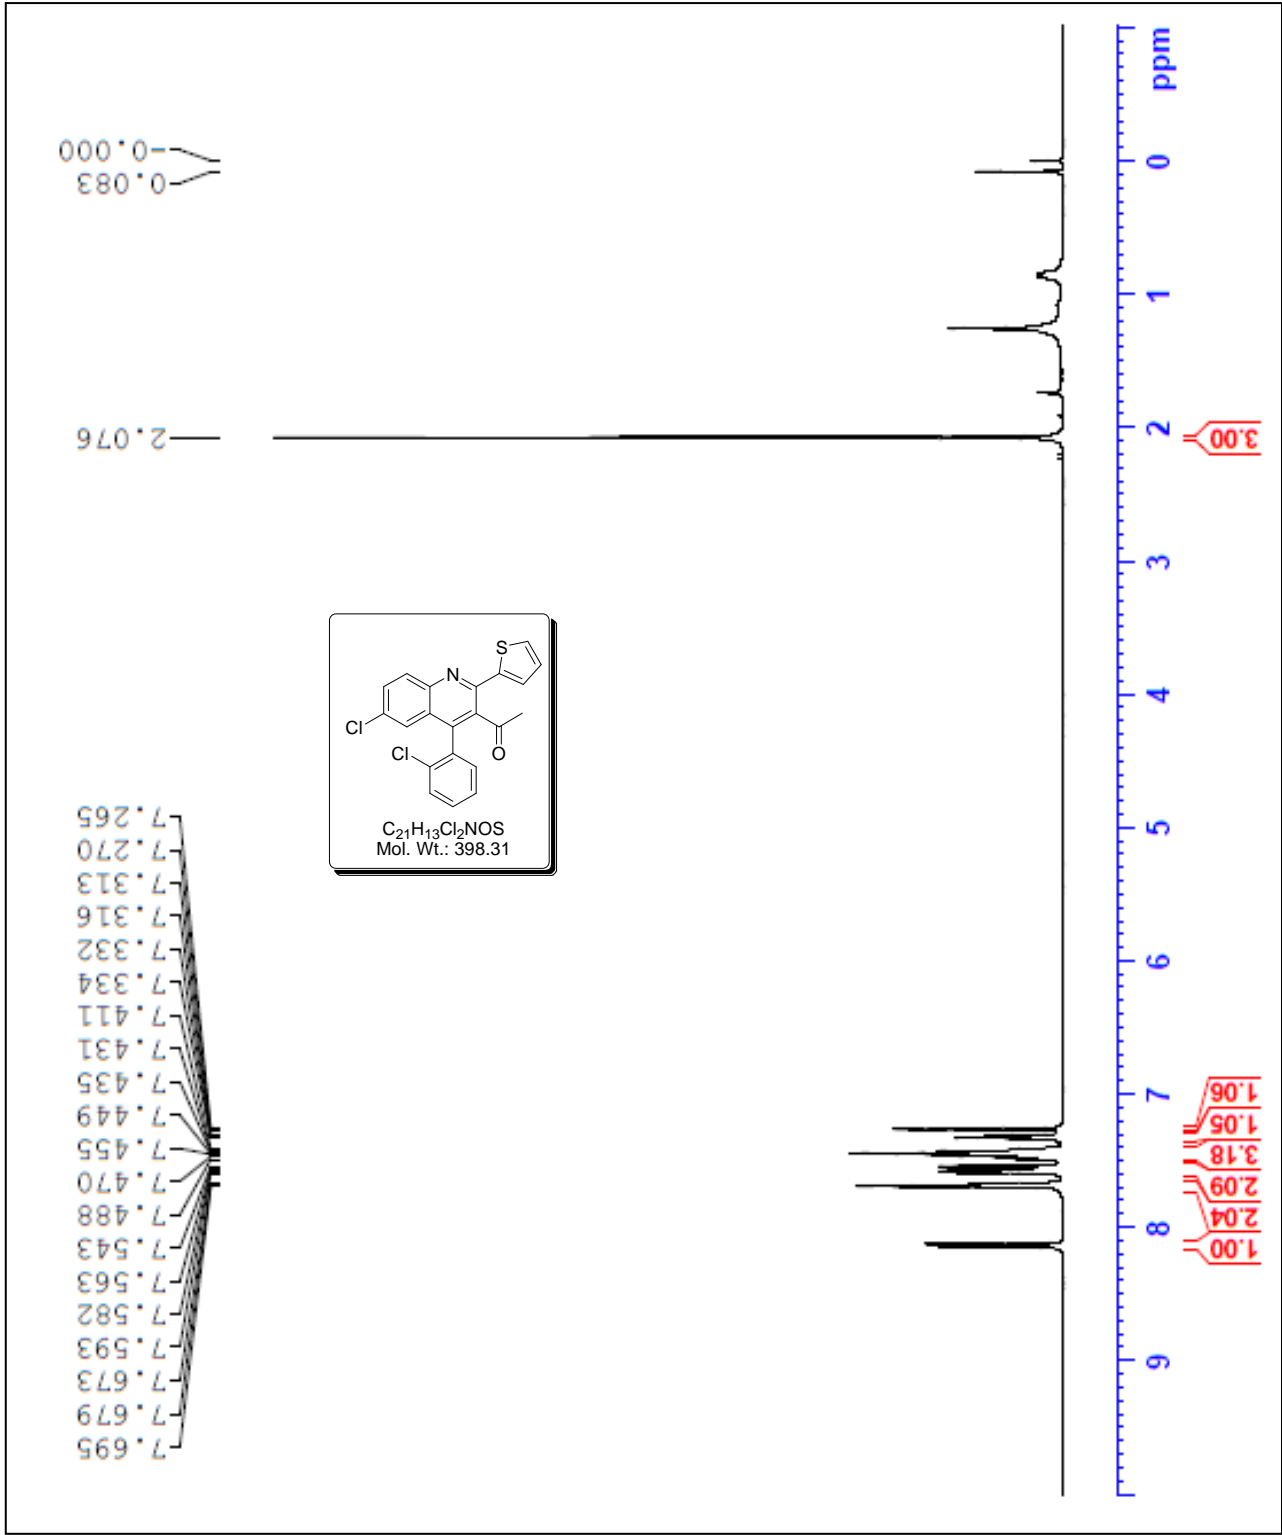

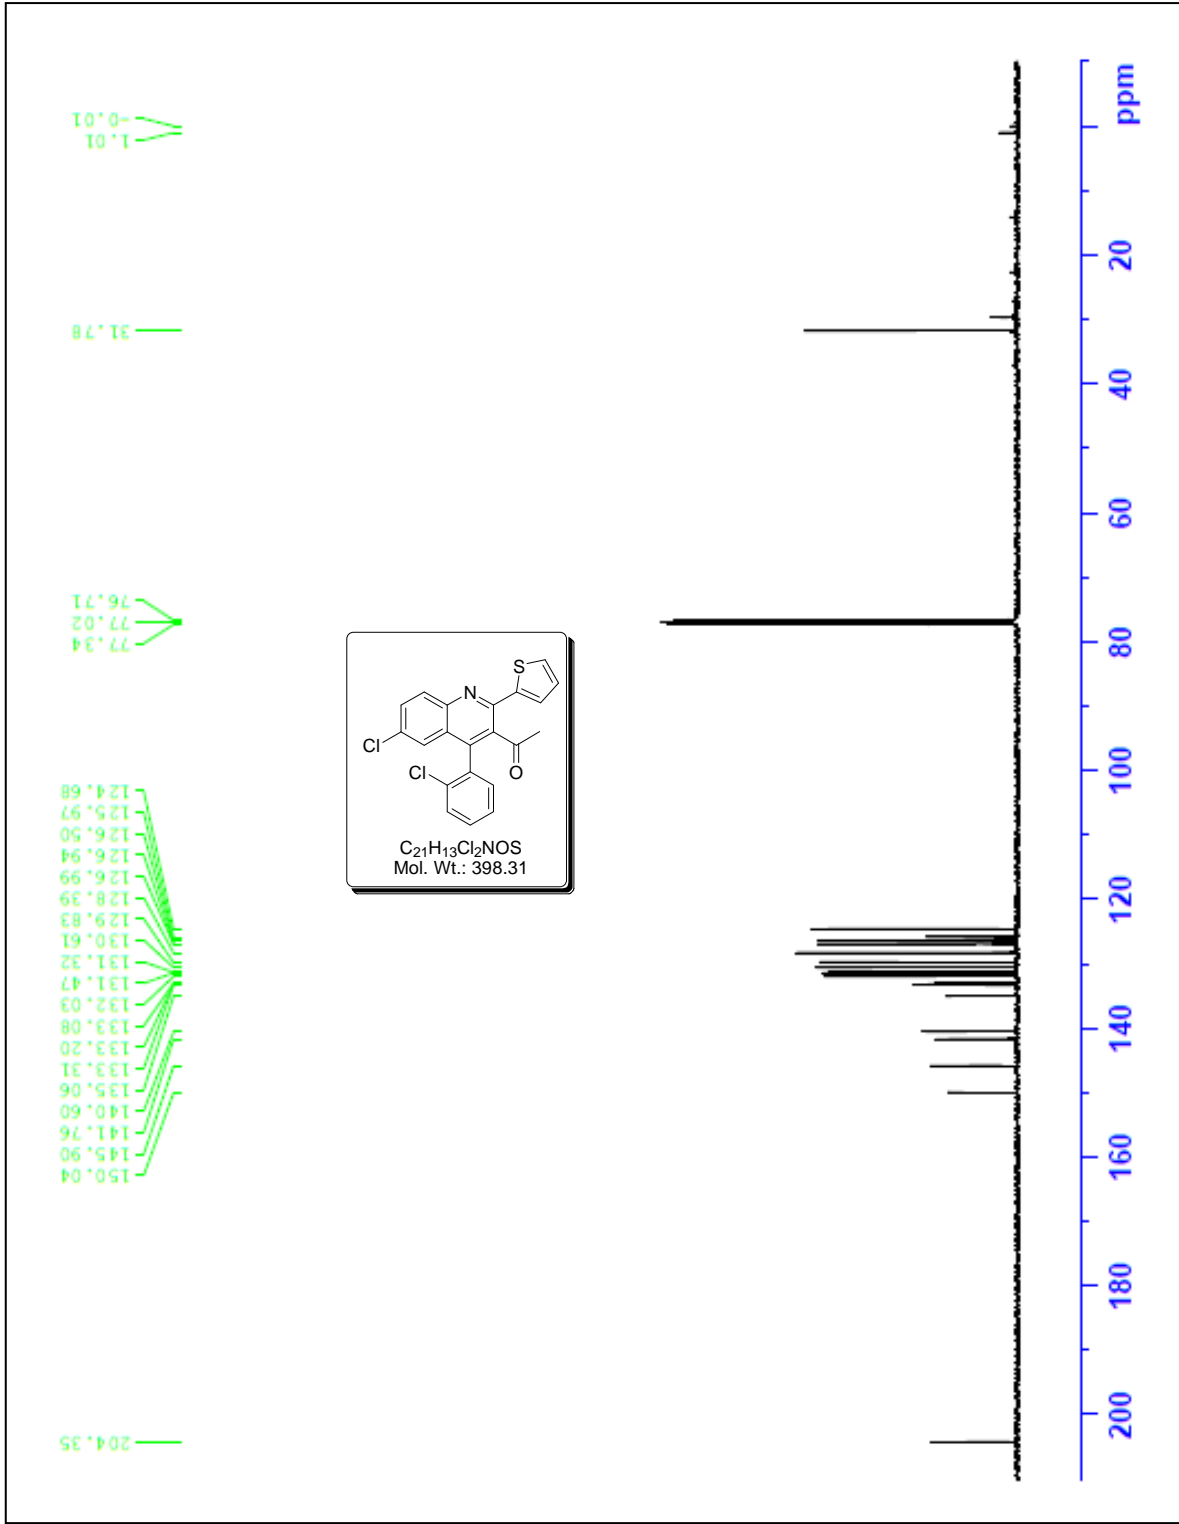

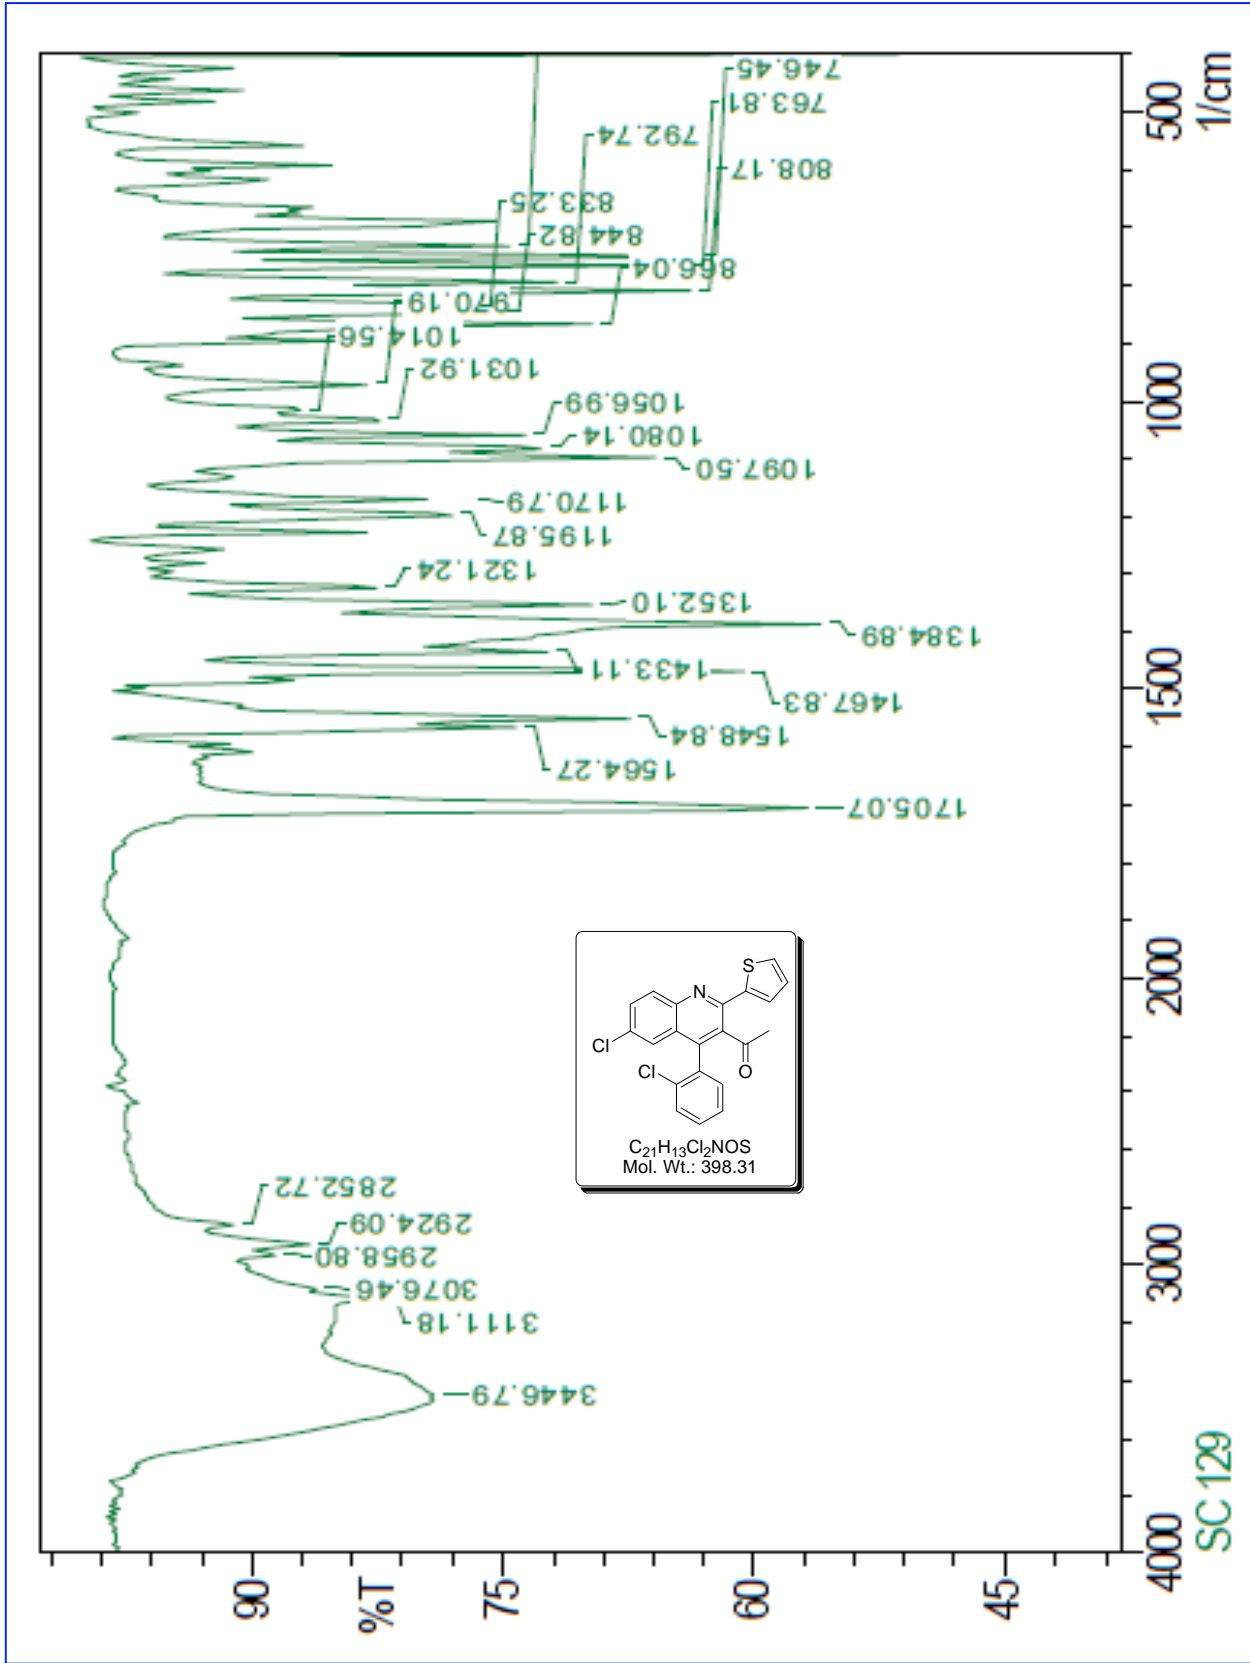

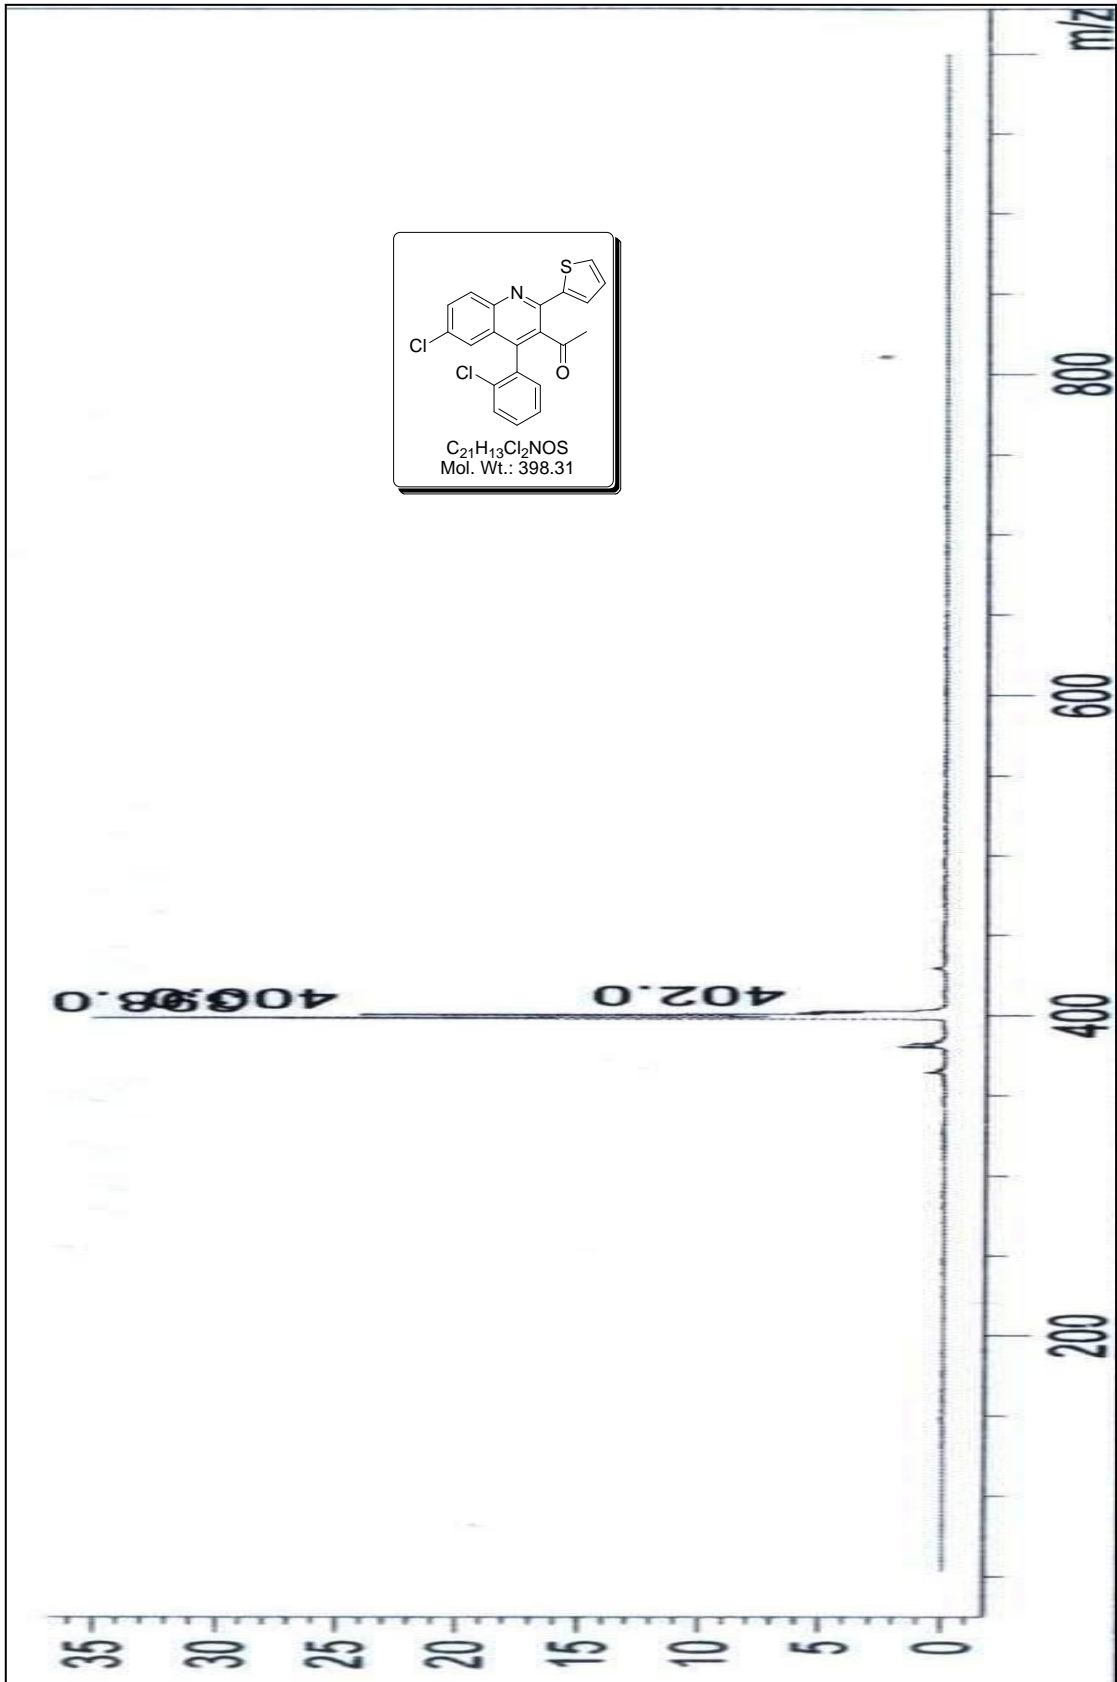

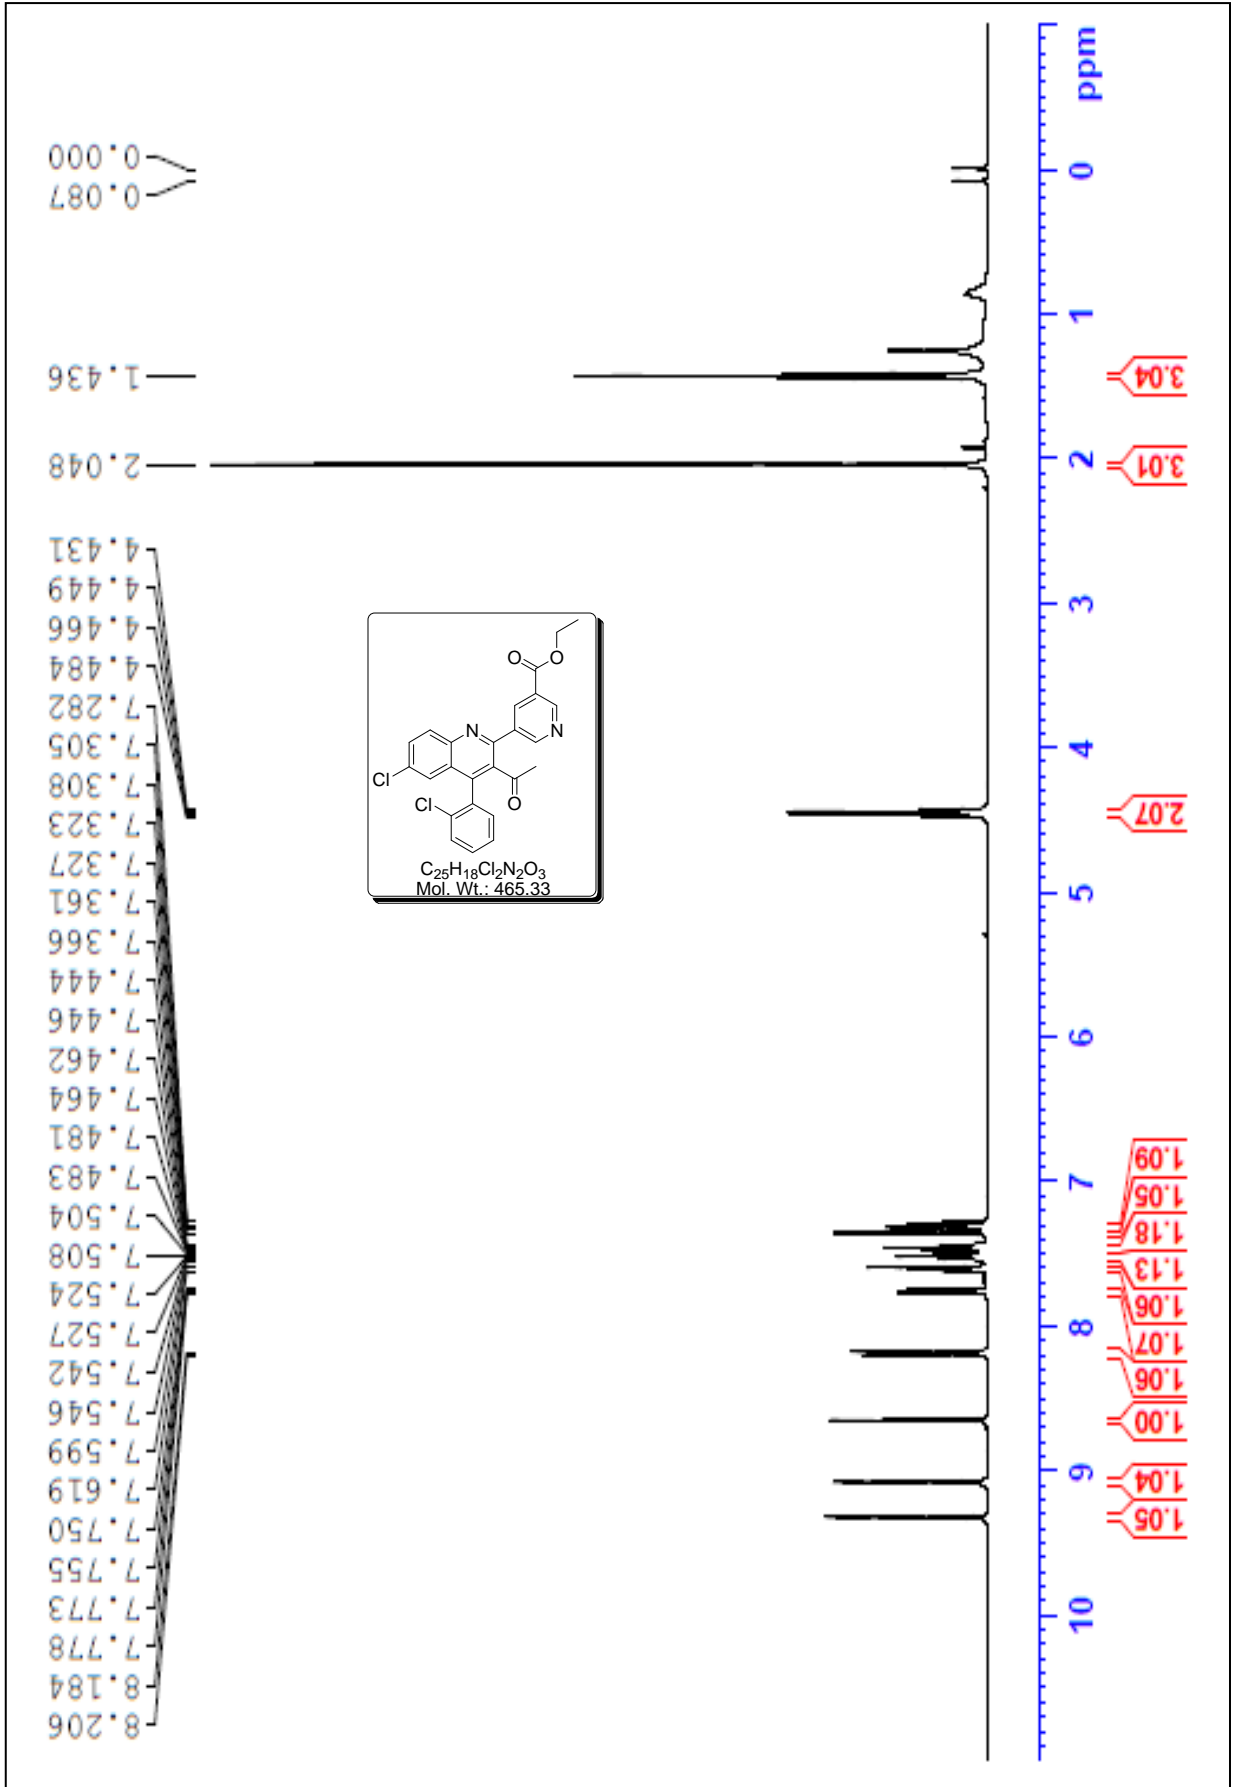

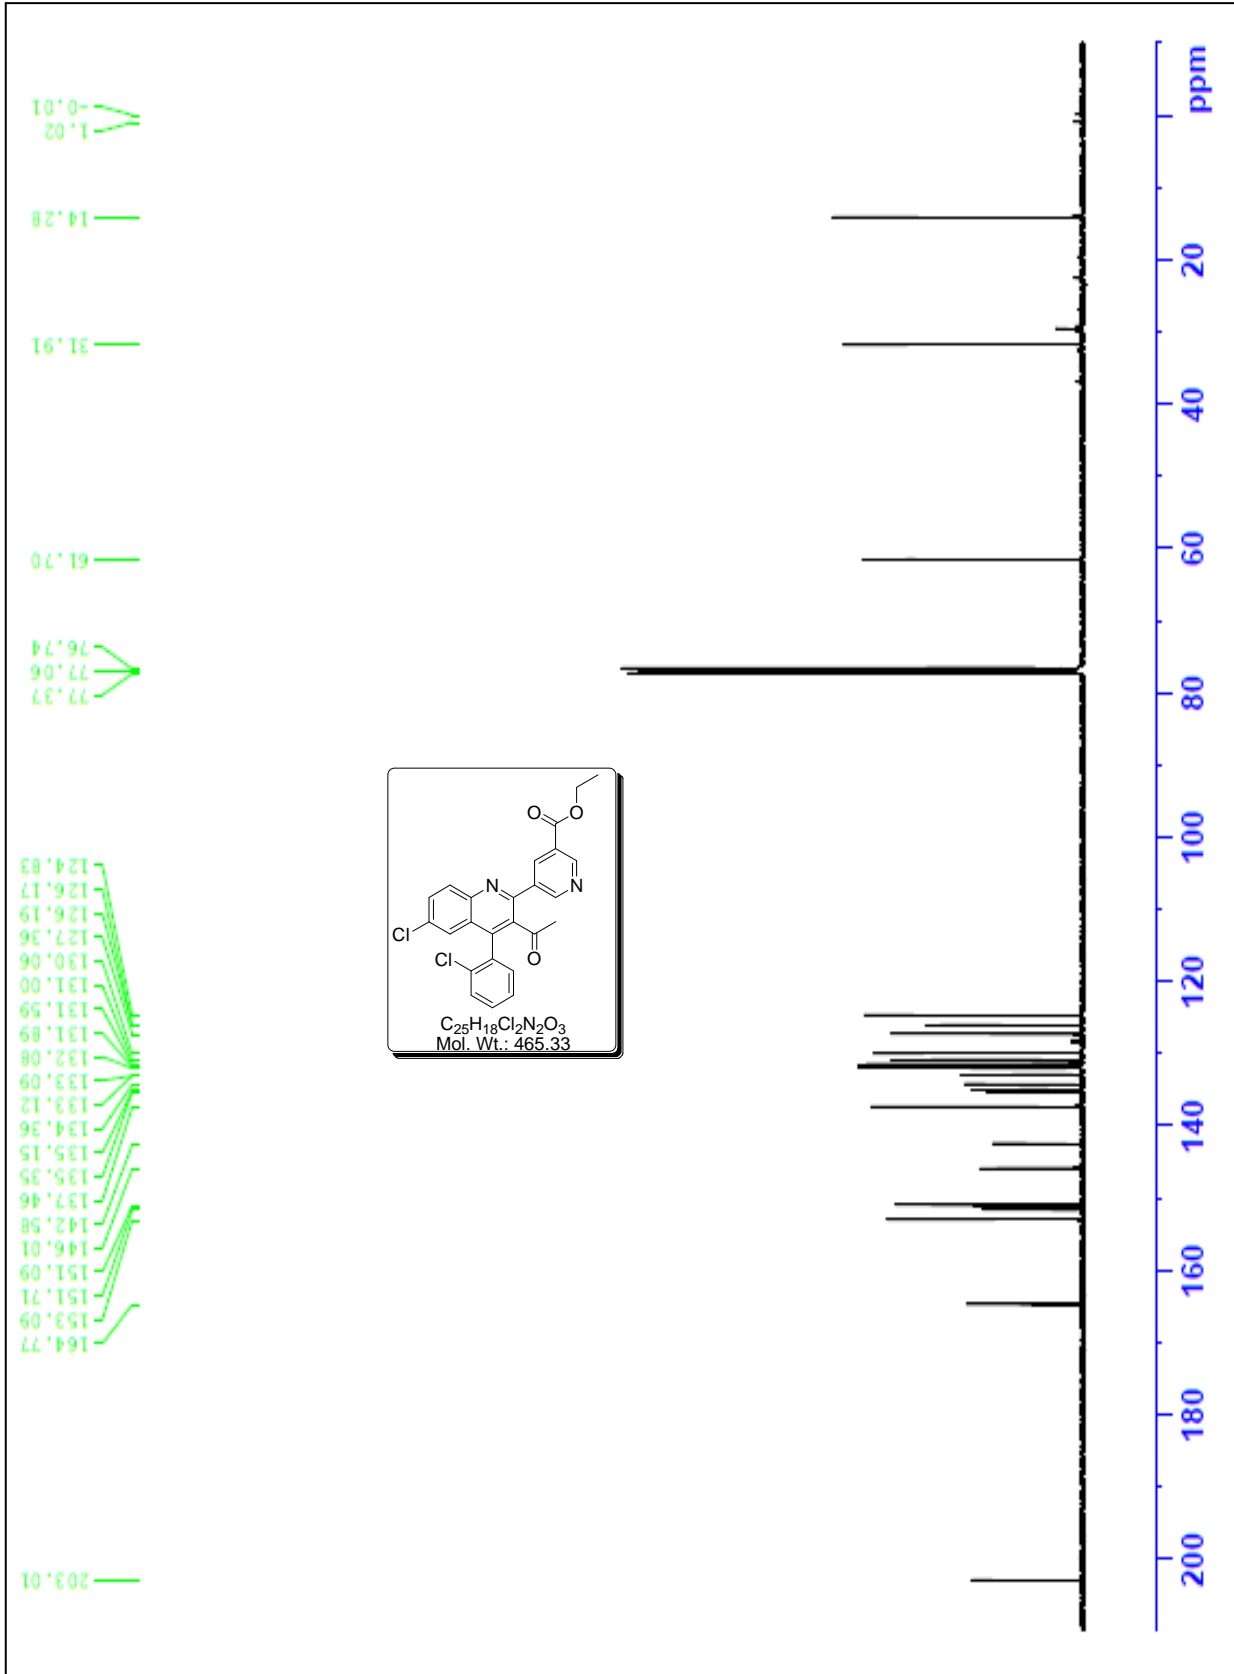

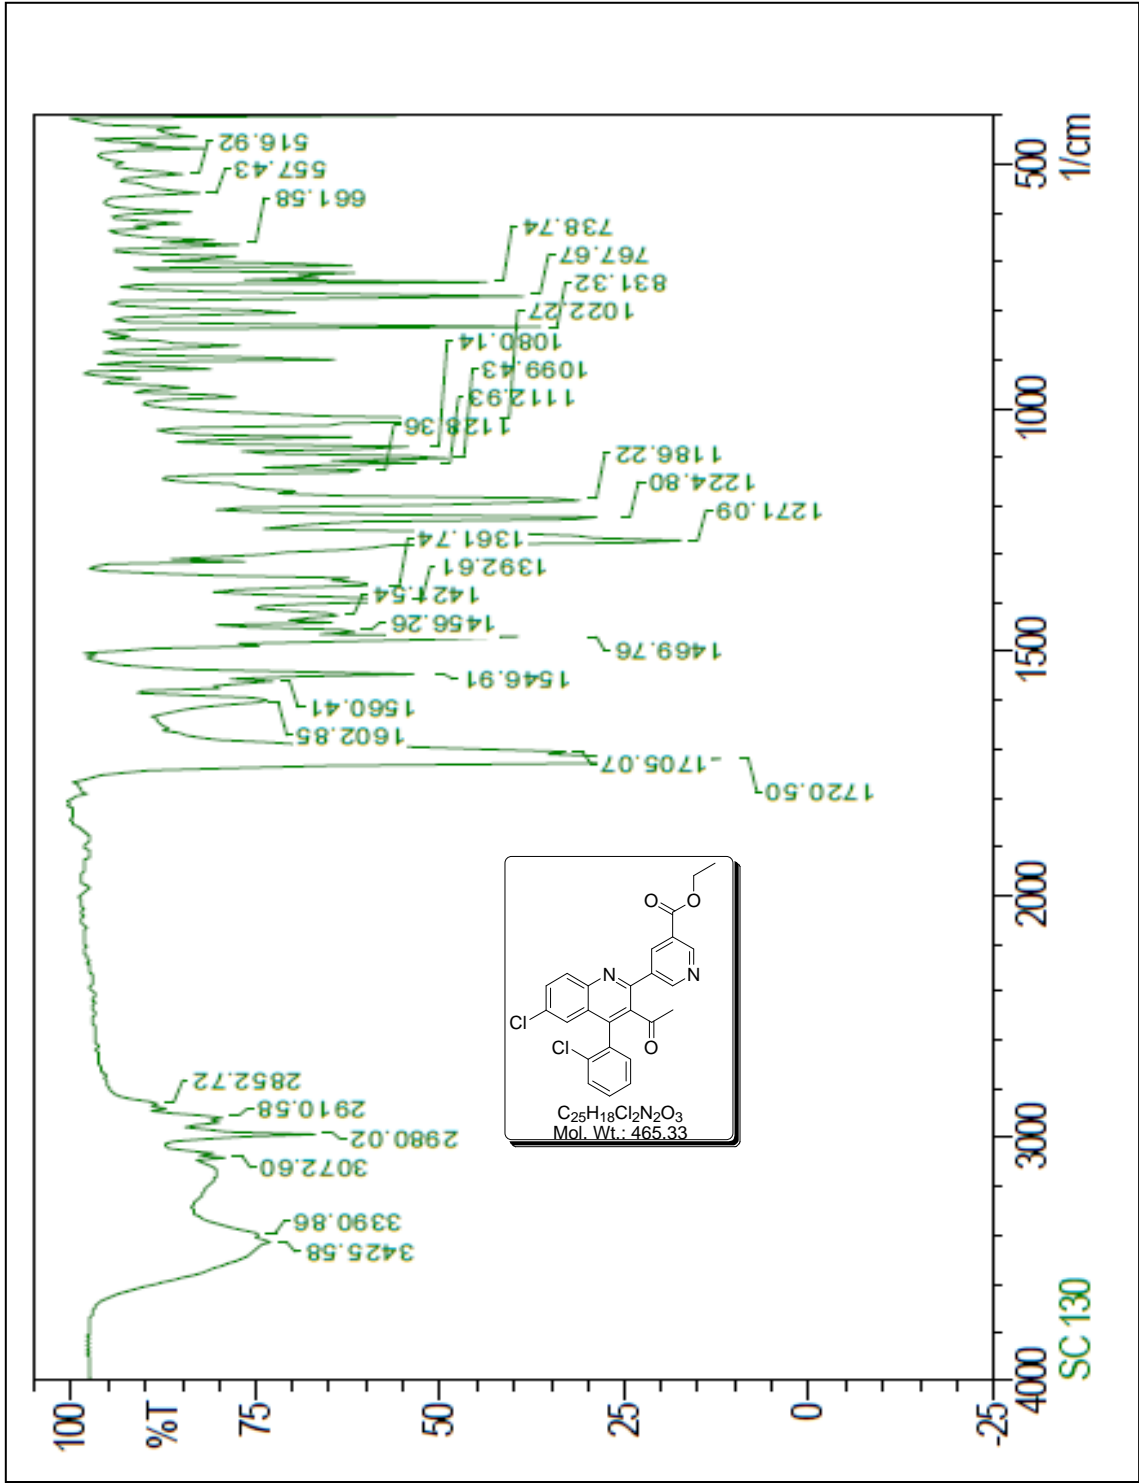

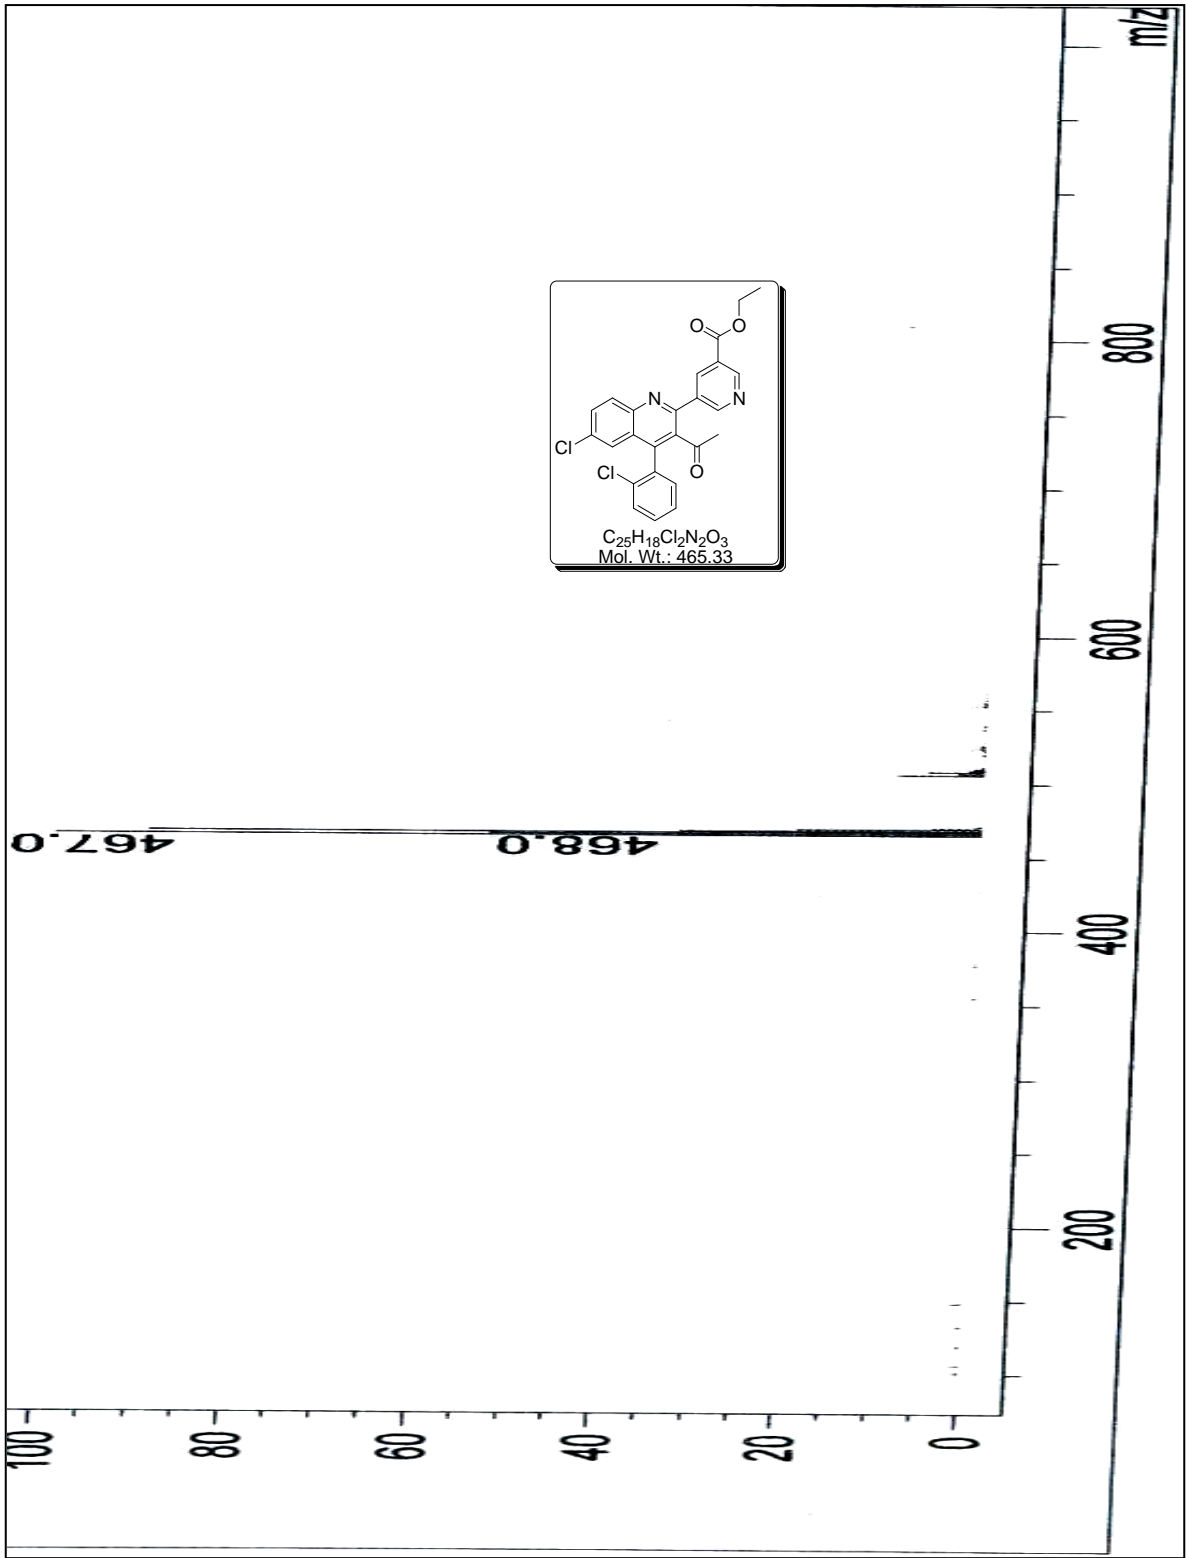



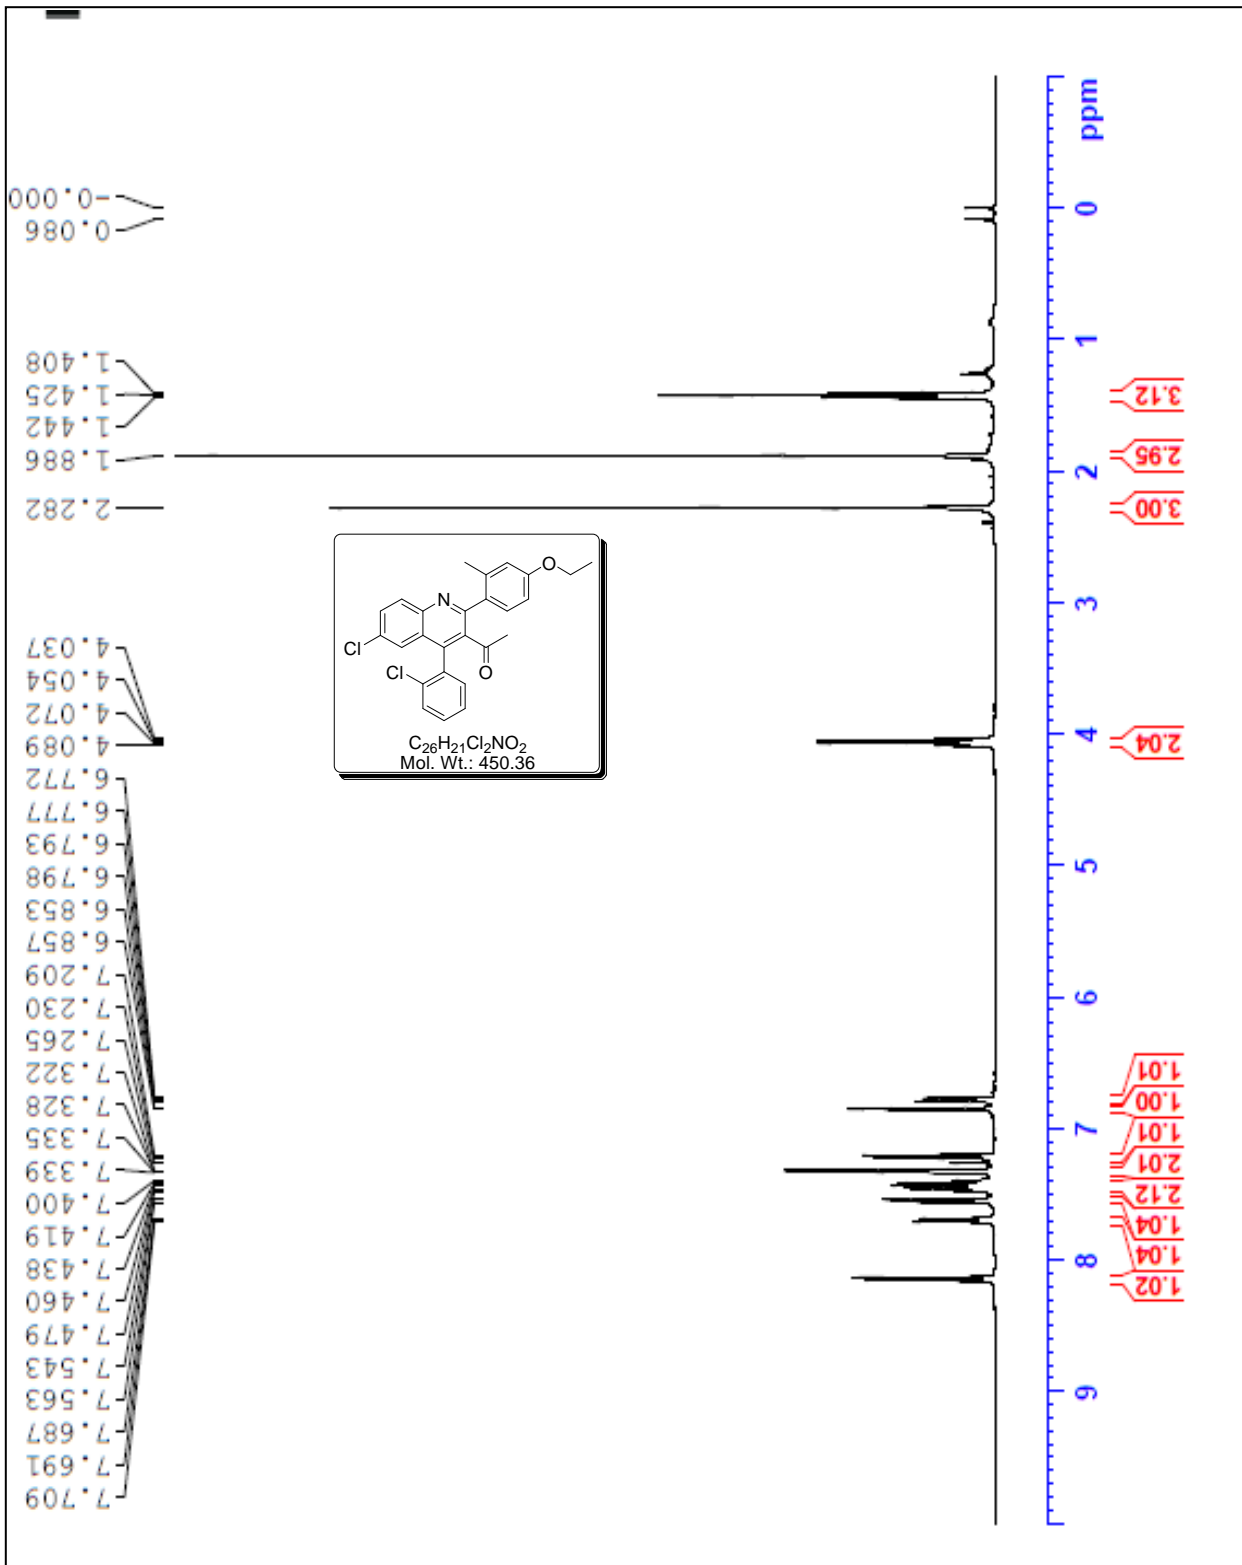

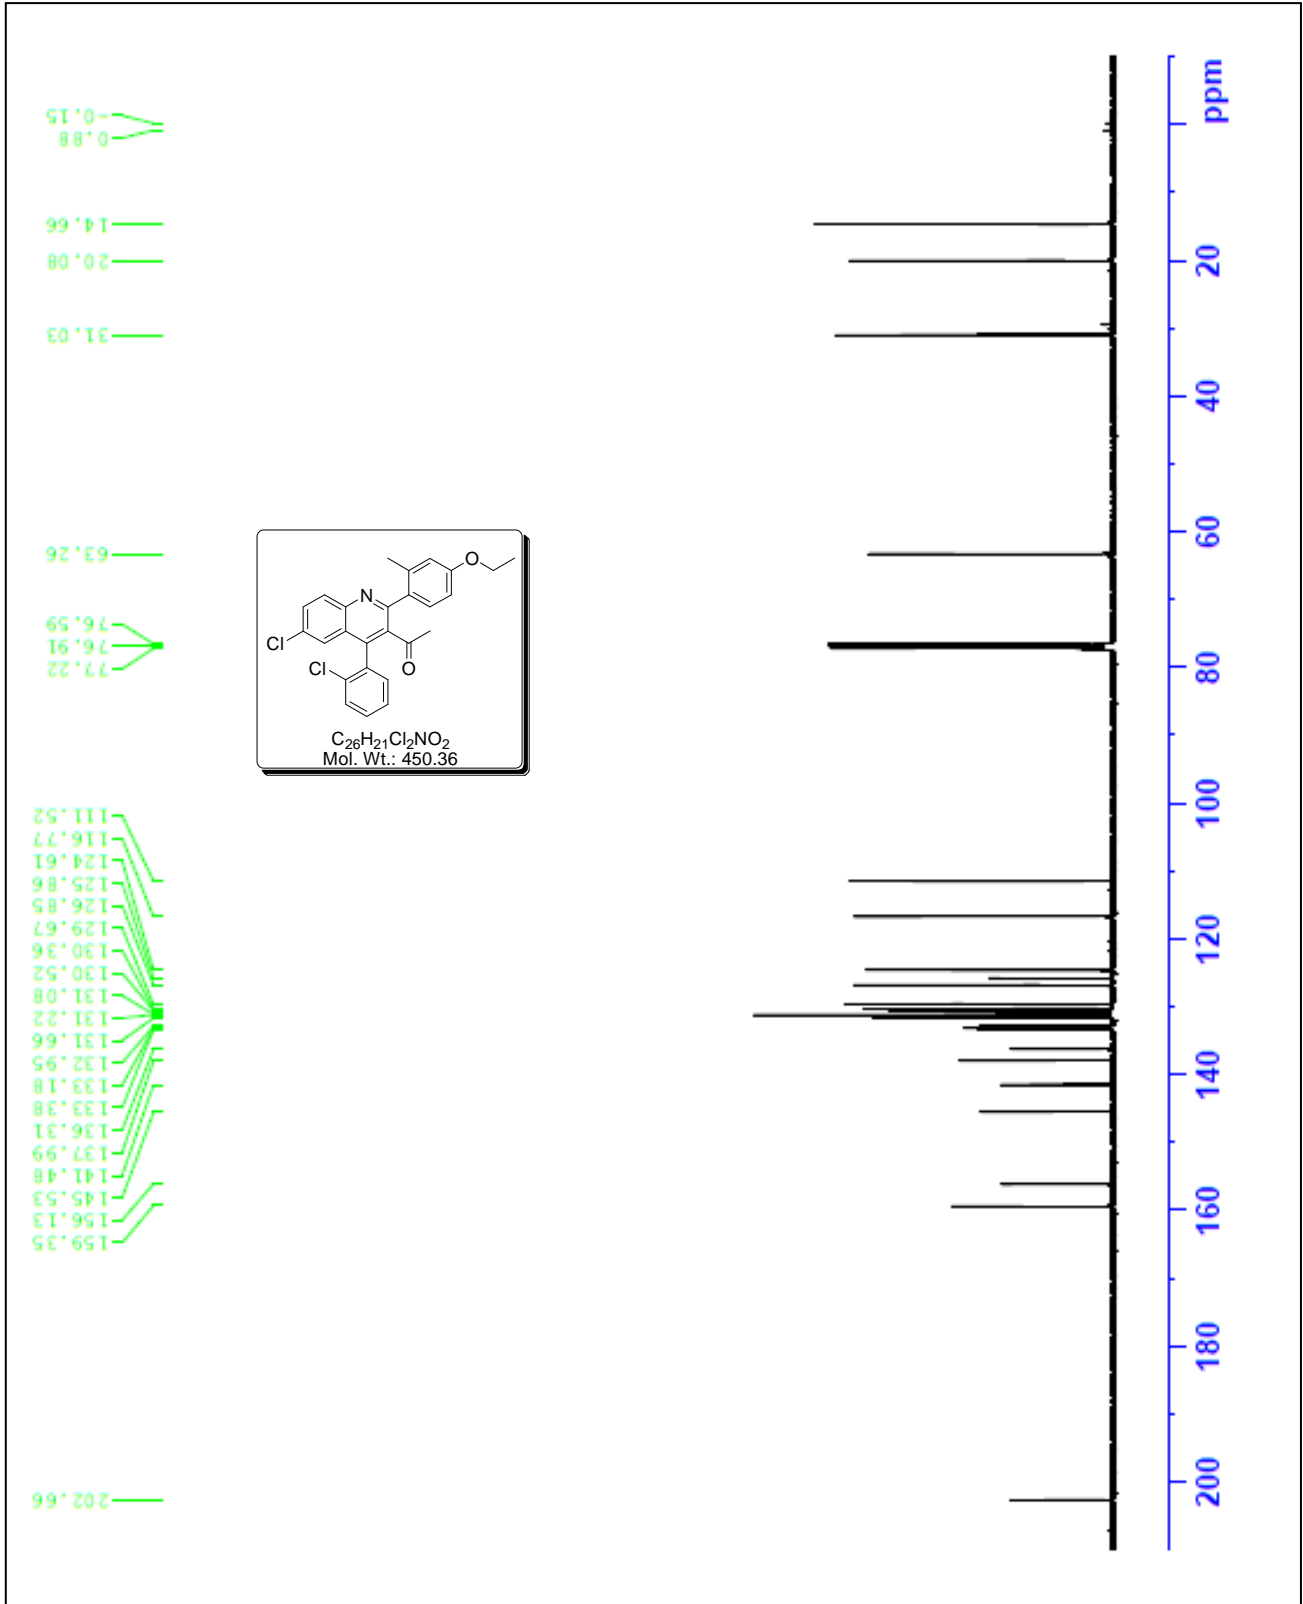

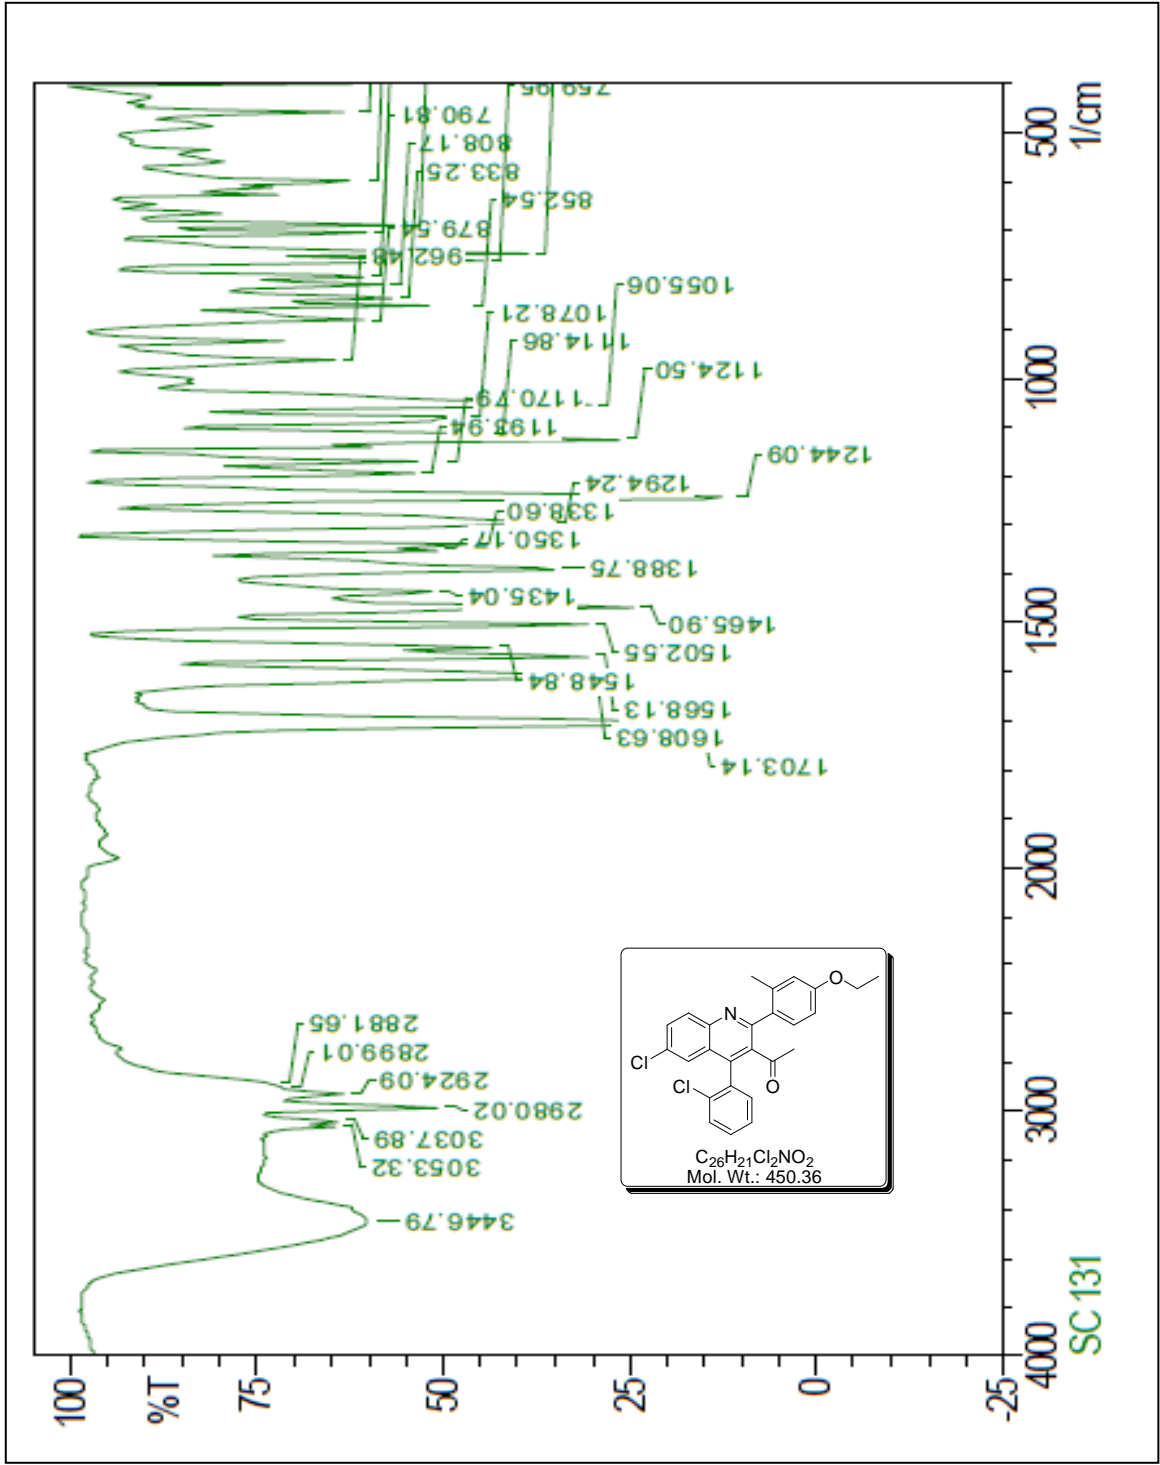

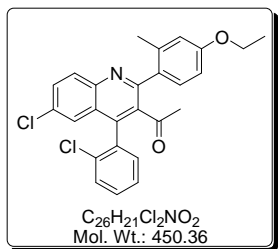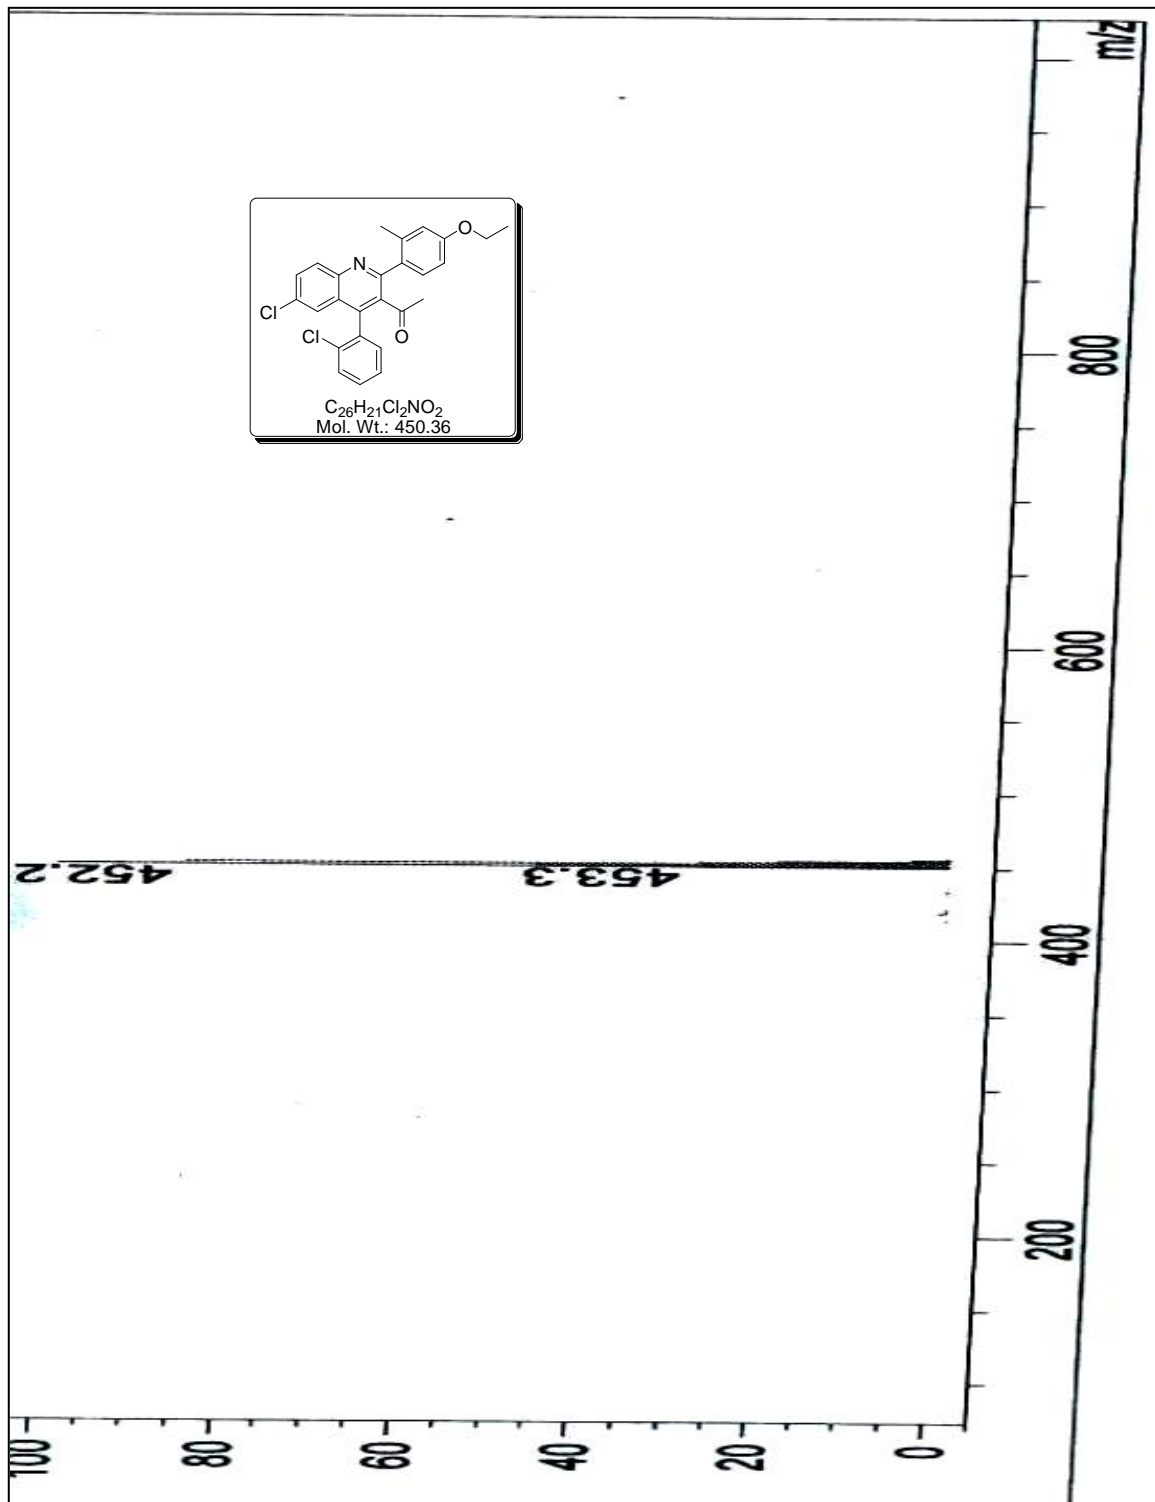

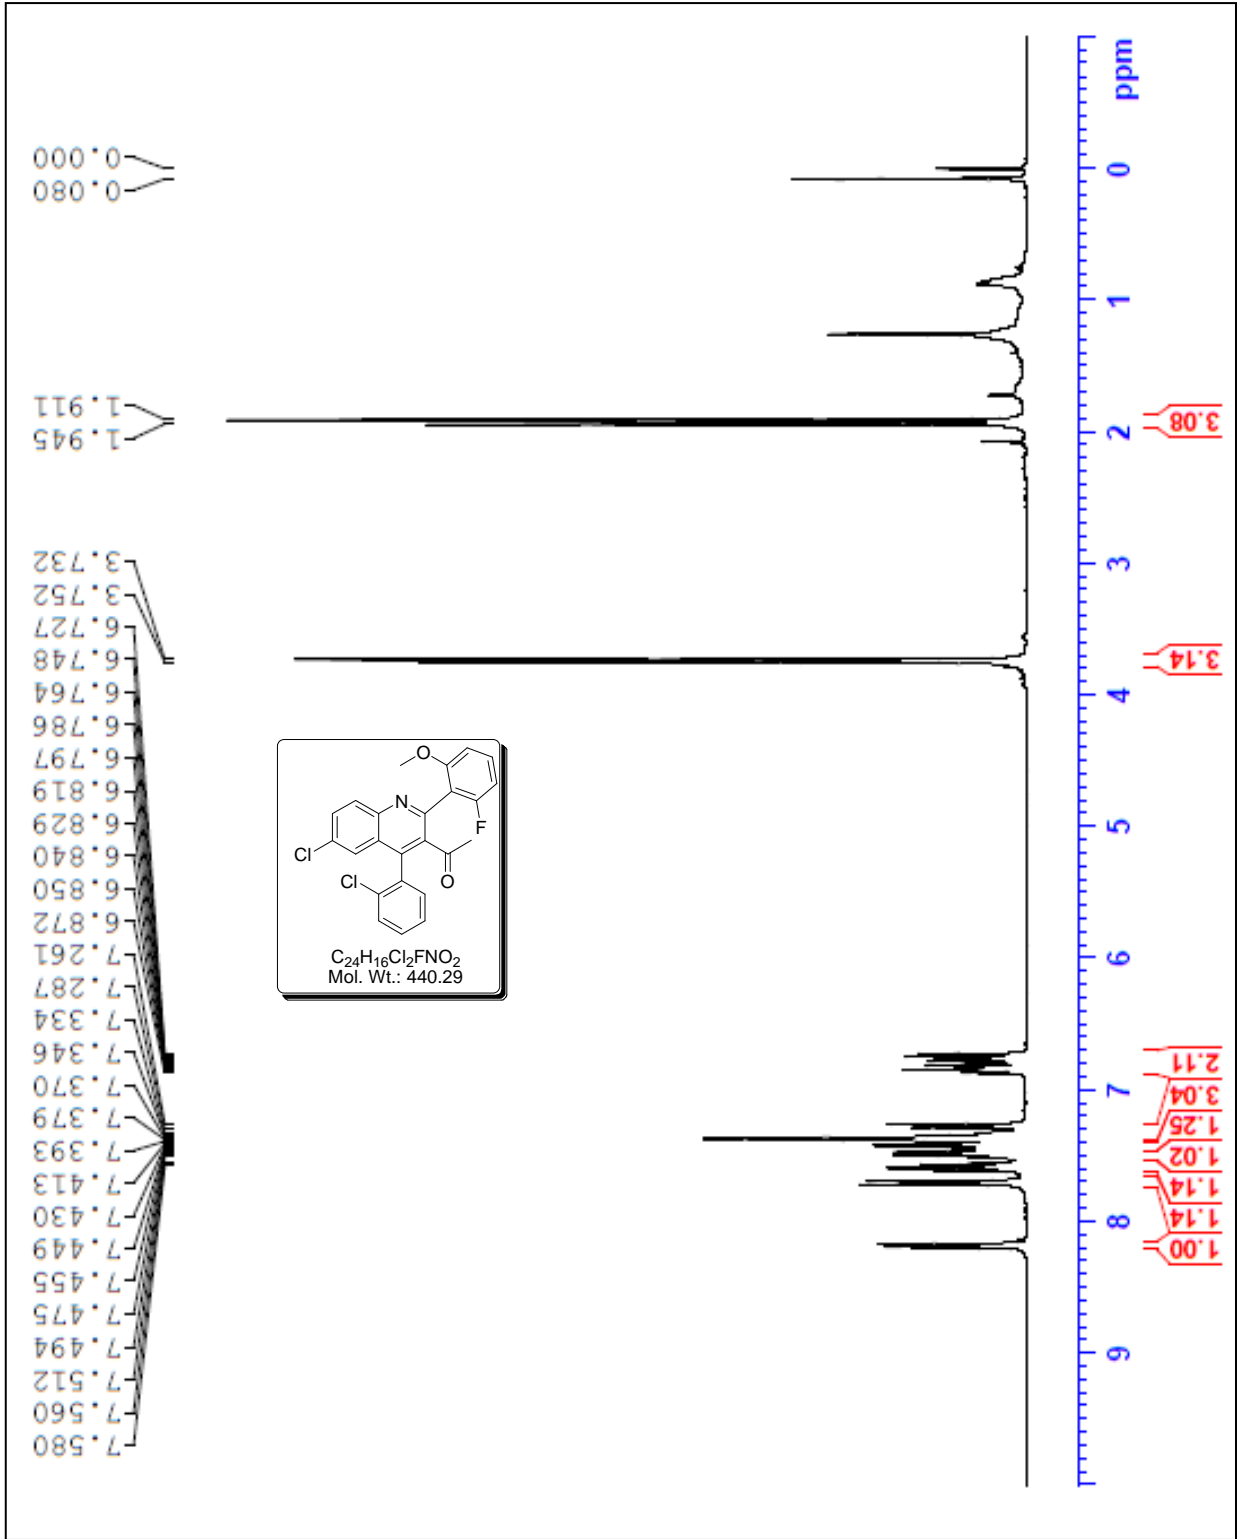

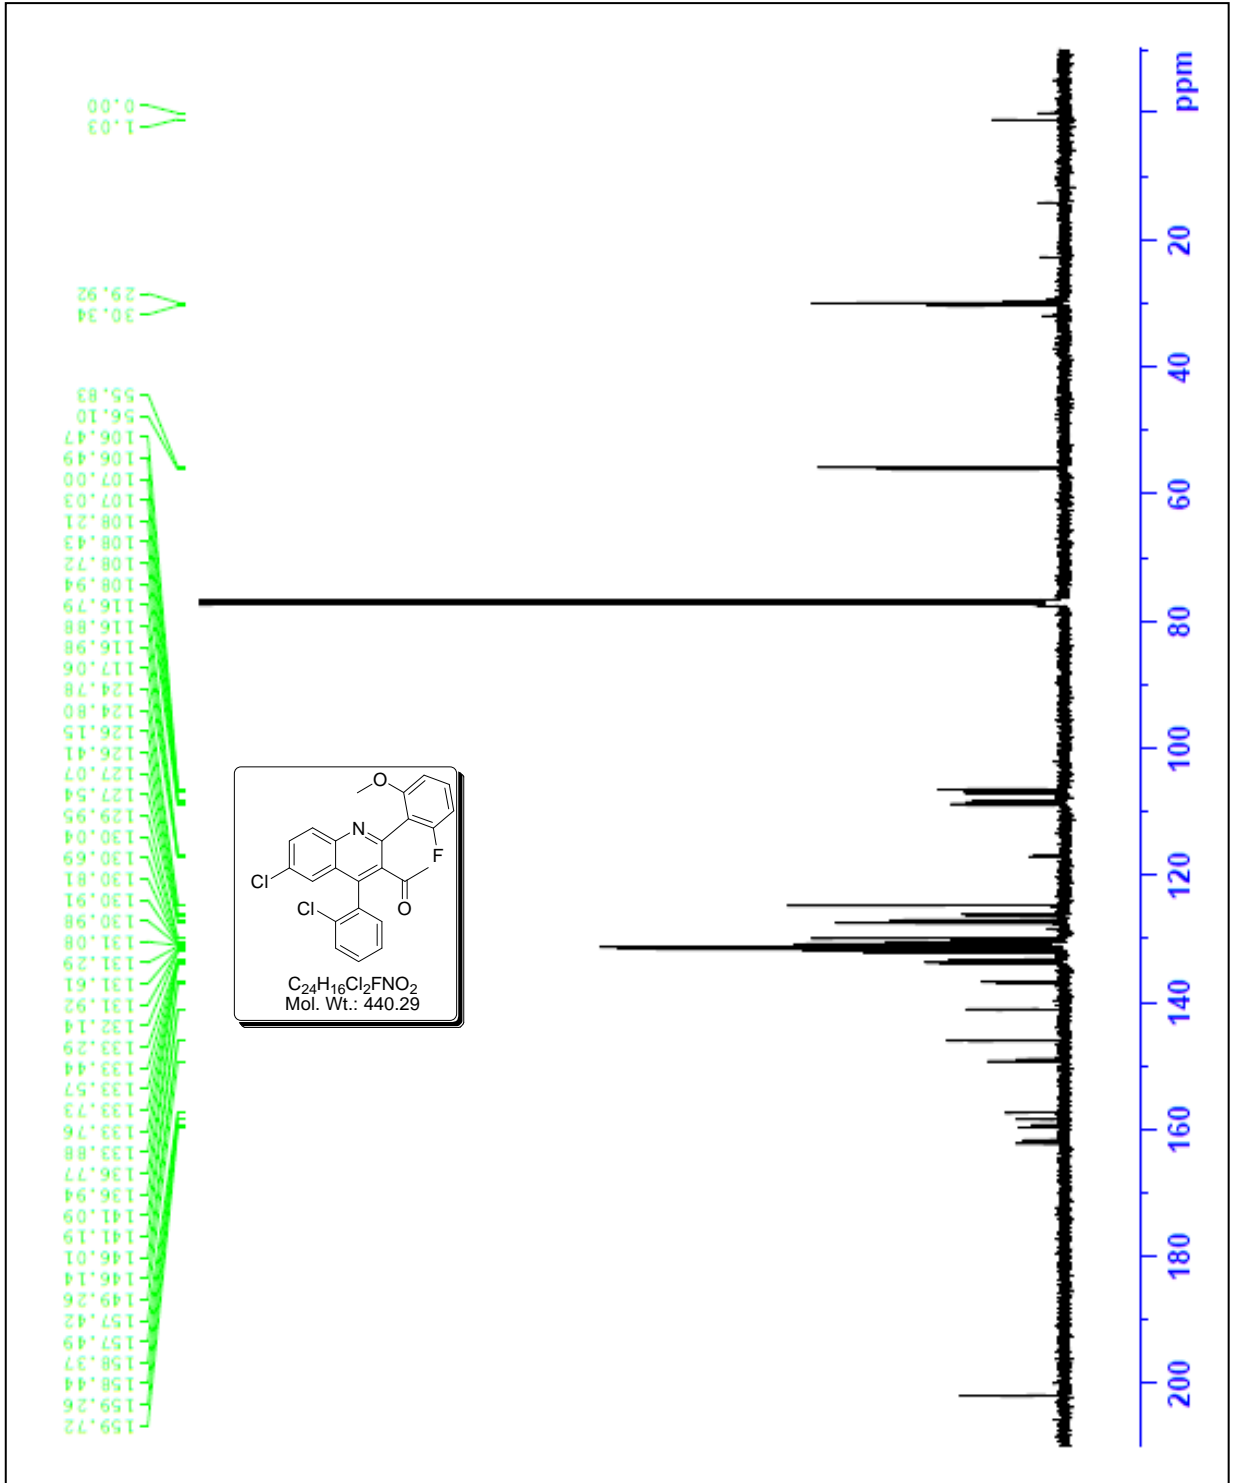

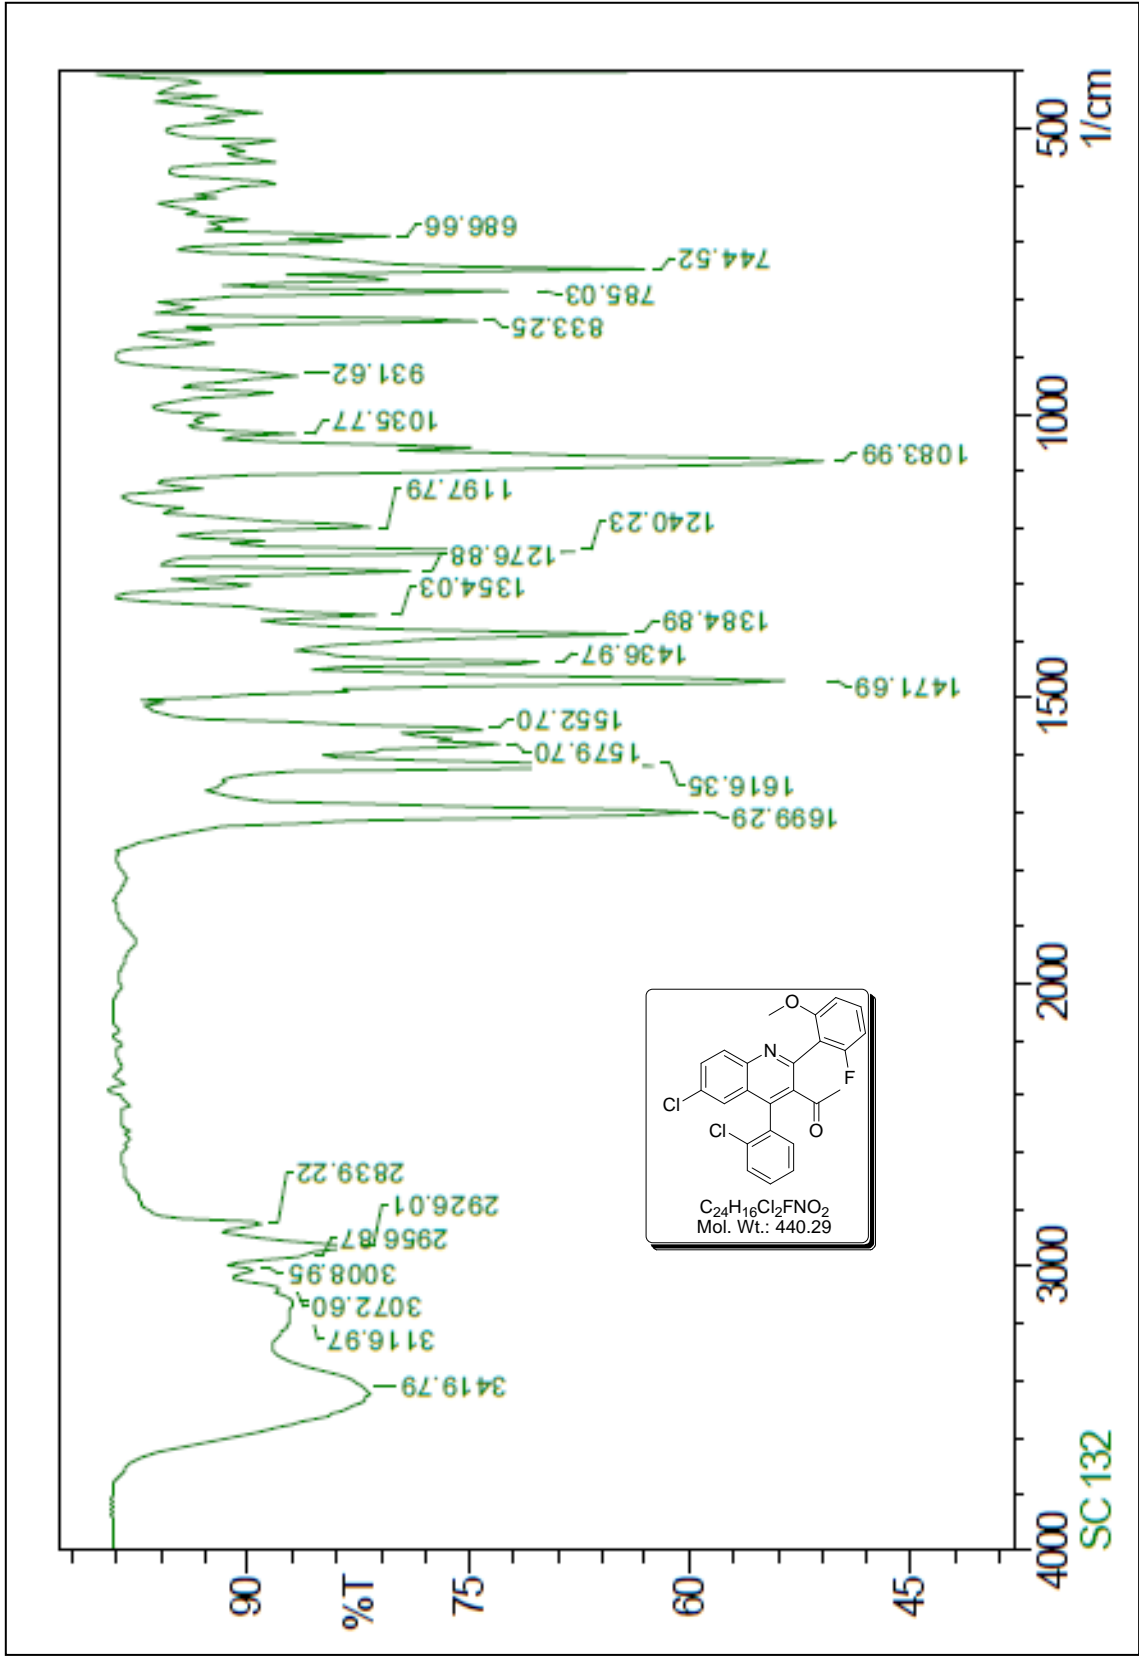

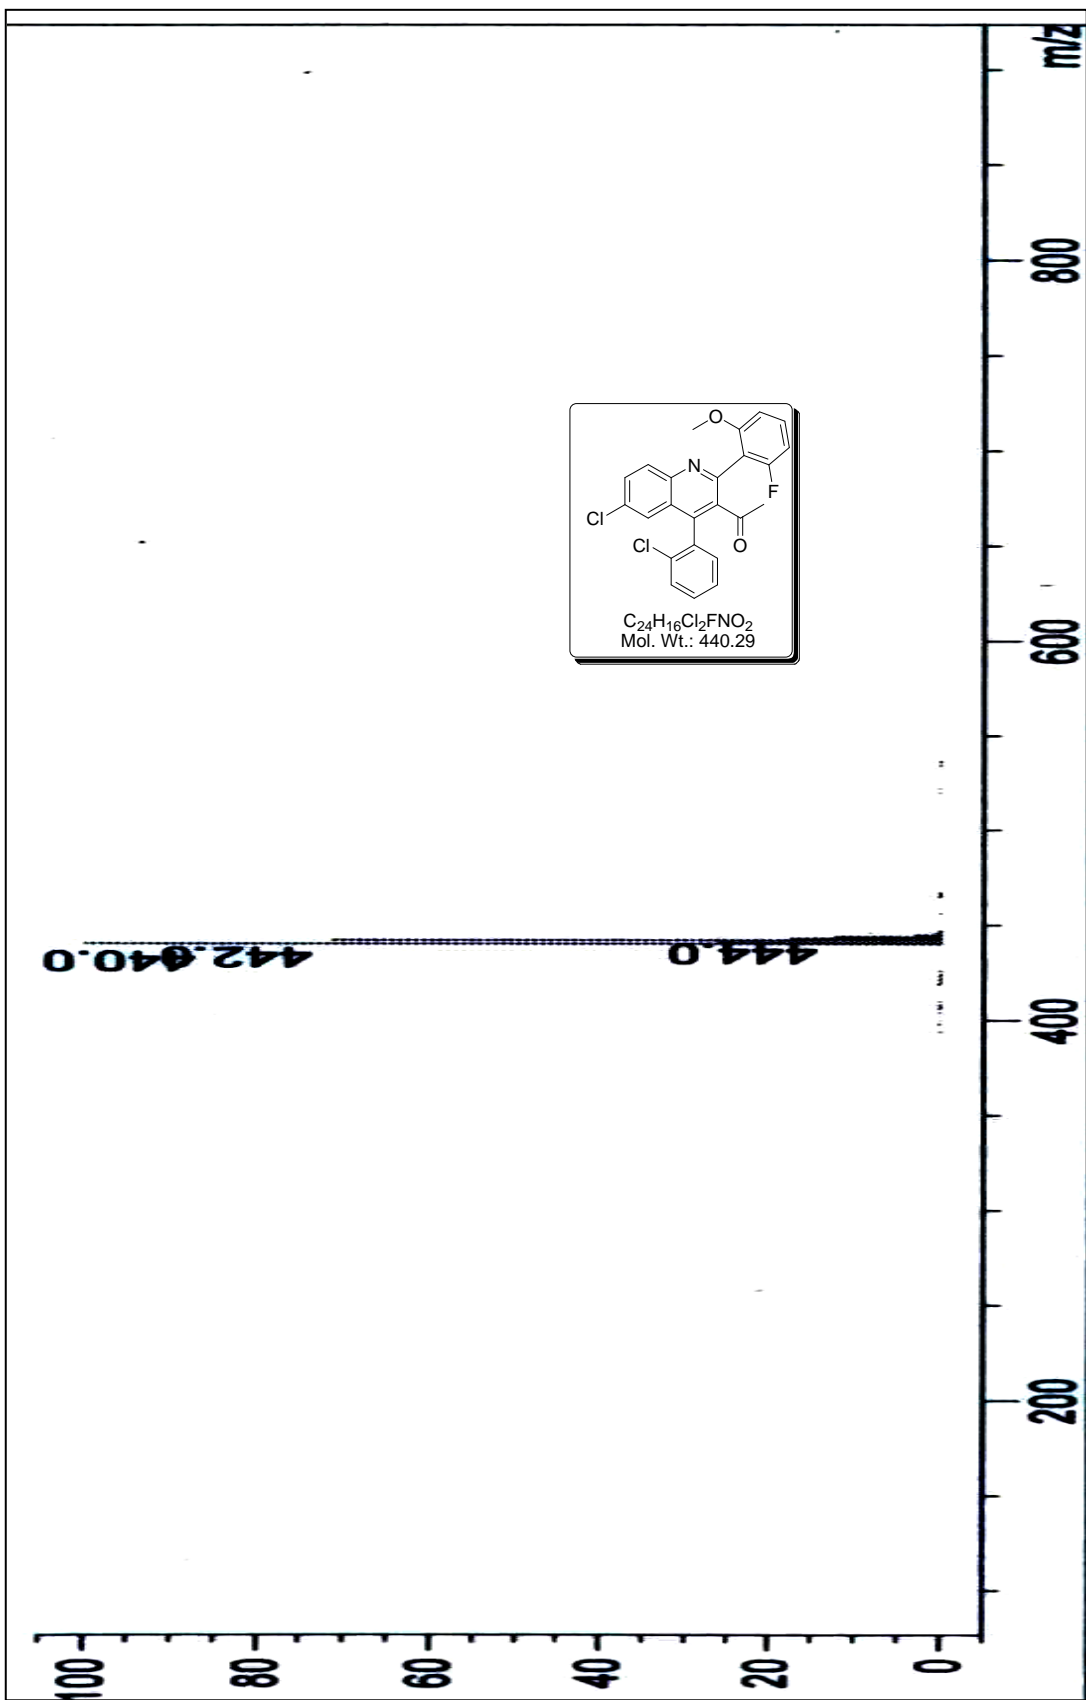



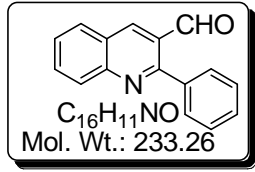

— 0.000

7.264  
7.564  
7.650  
7.690  
7.889  
8.024  
8.042  
8.214  
8.236  
8.867

— 10.191

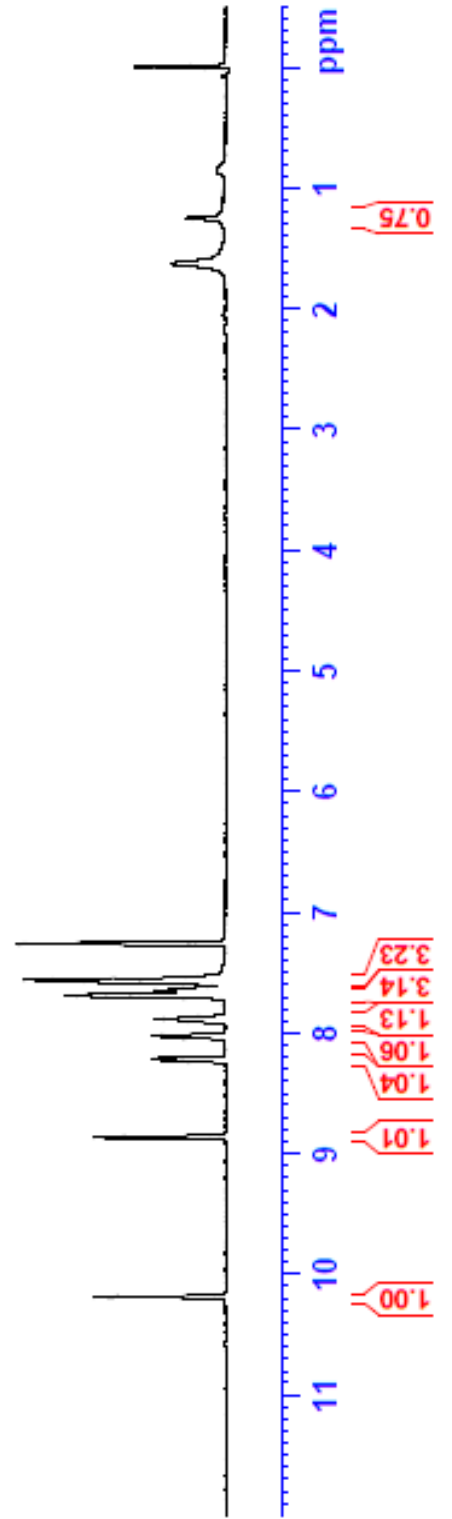

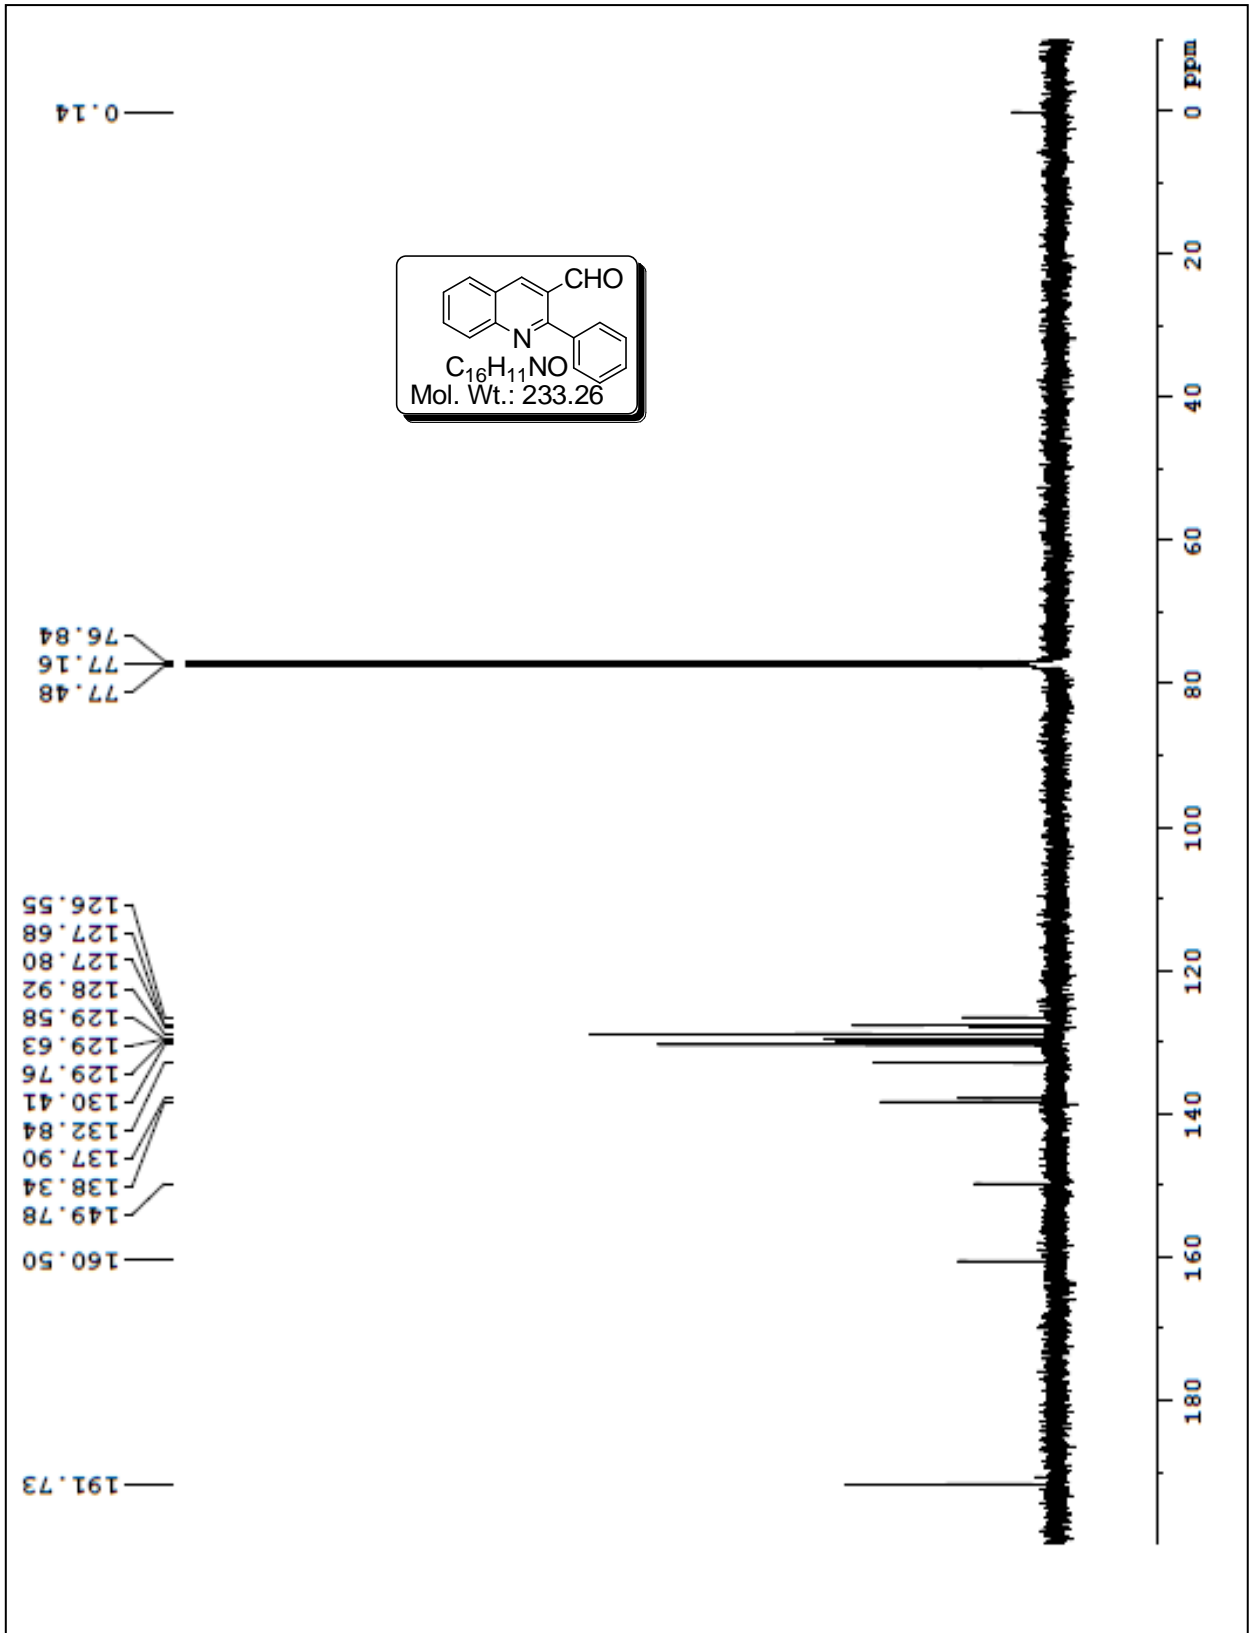

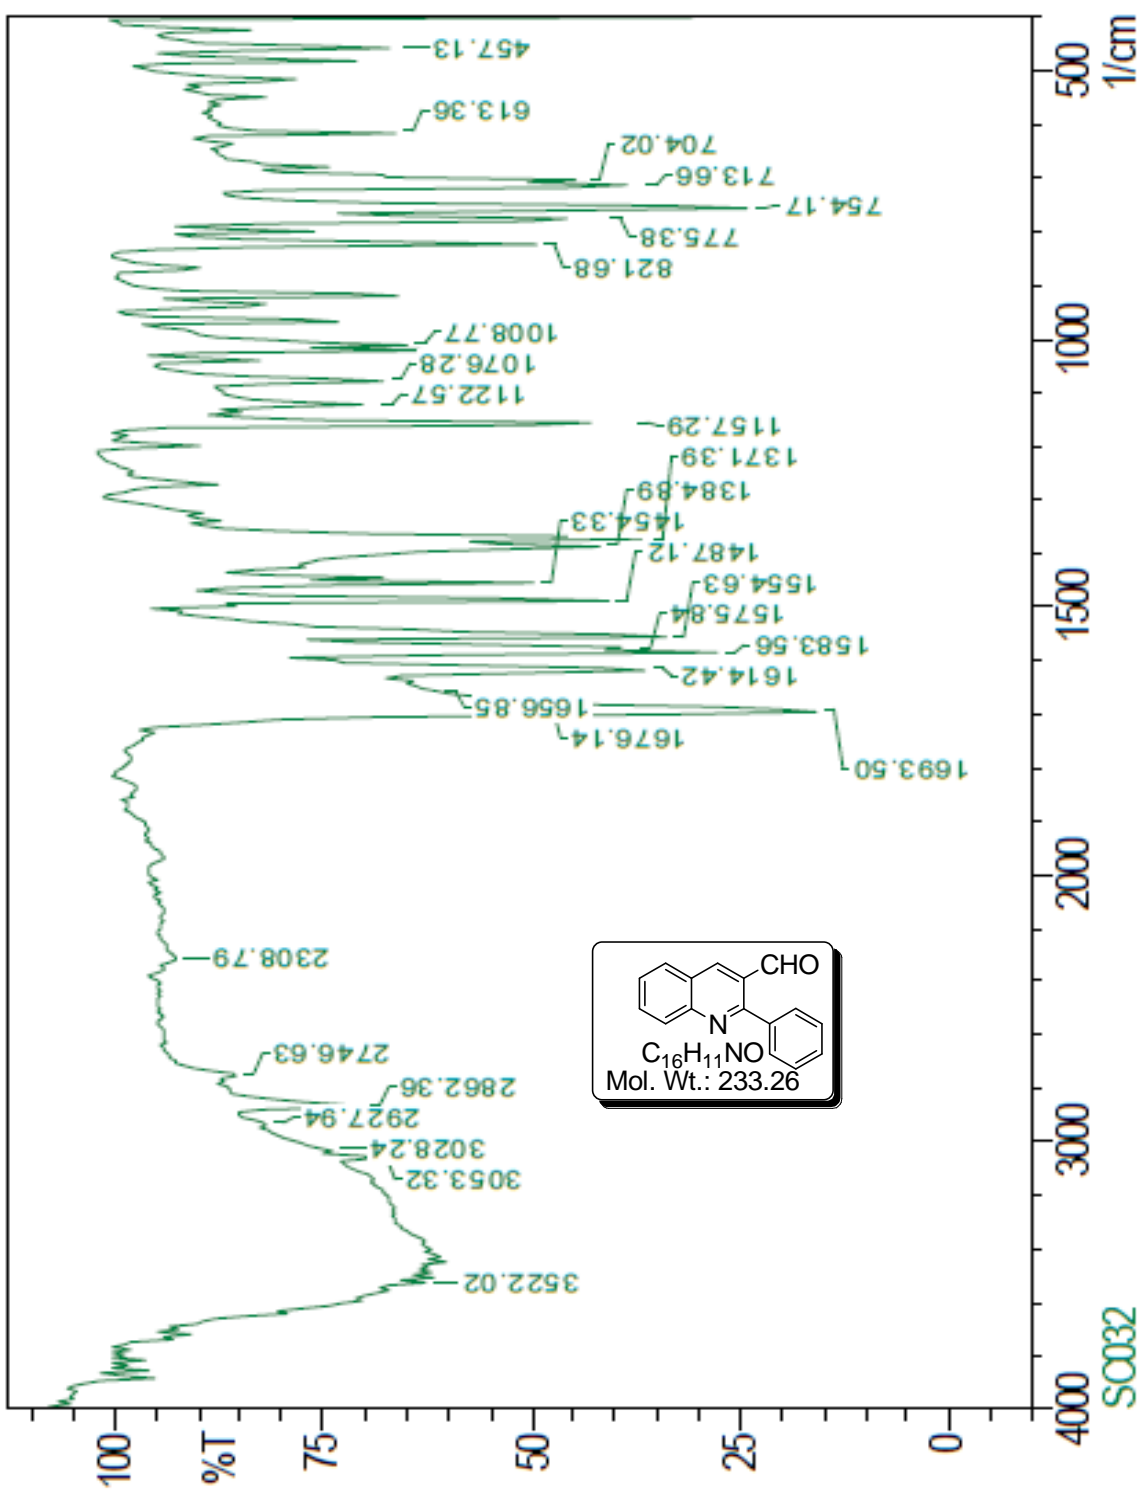

+MS, 2.7min #150

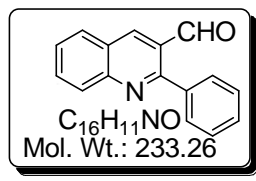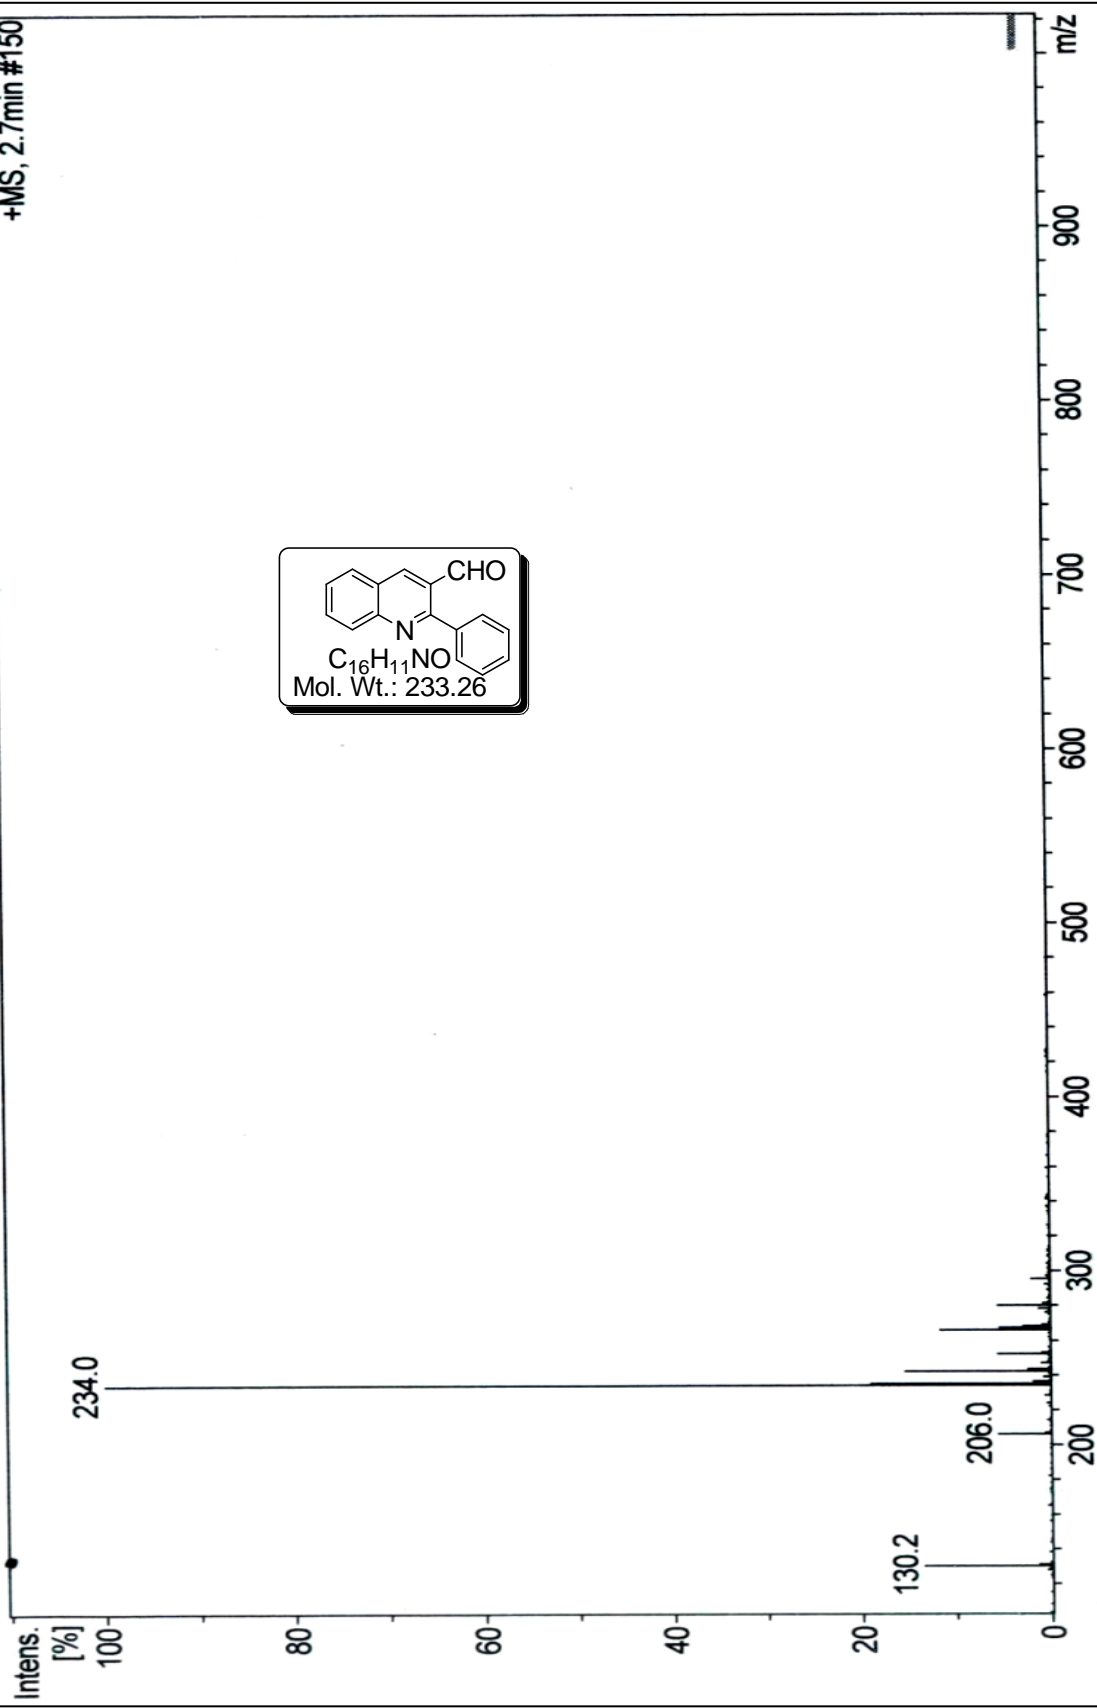

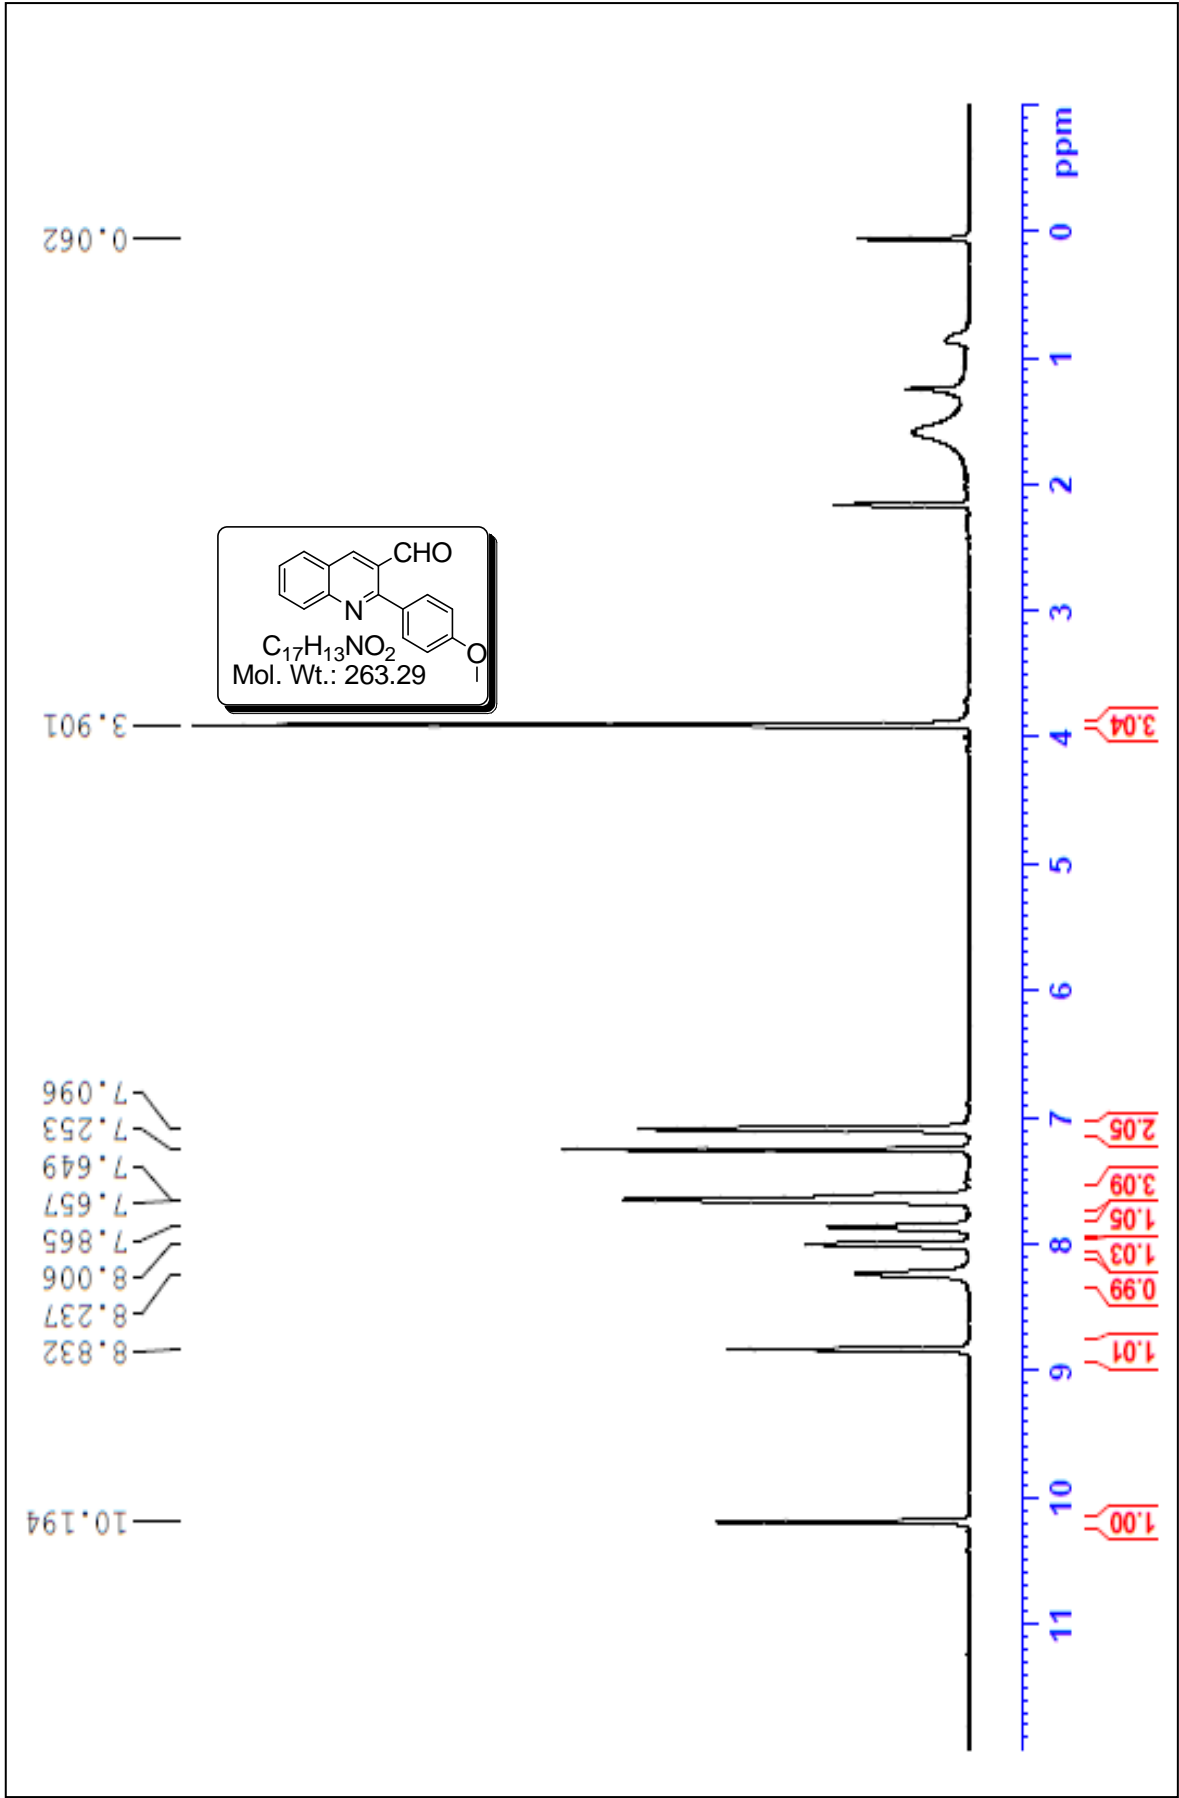

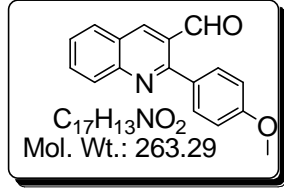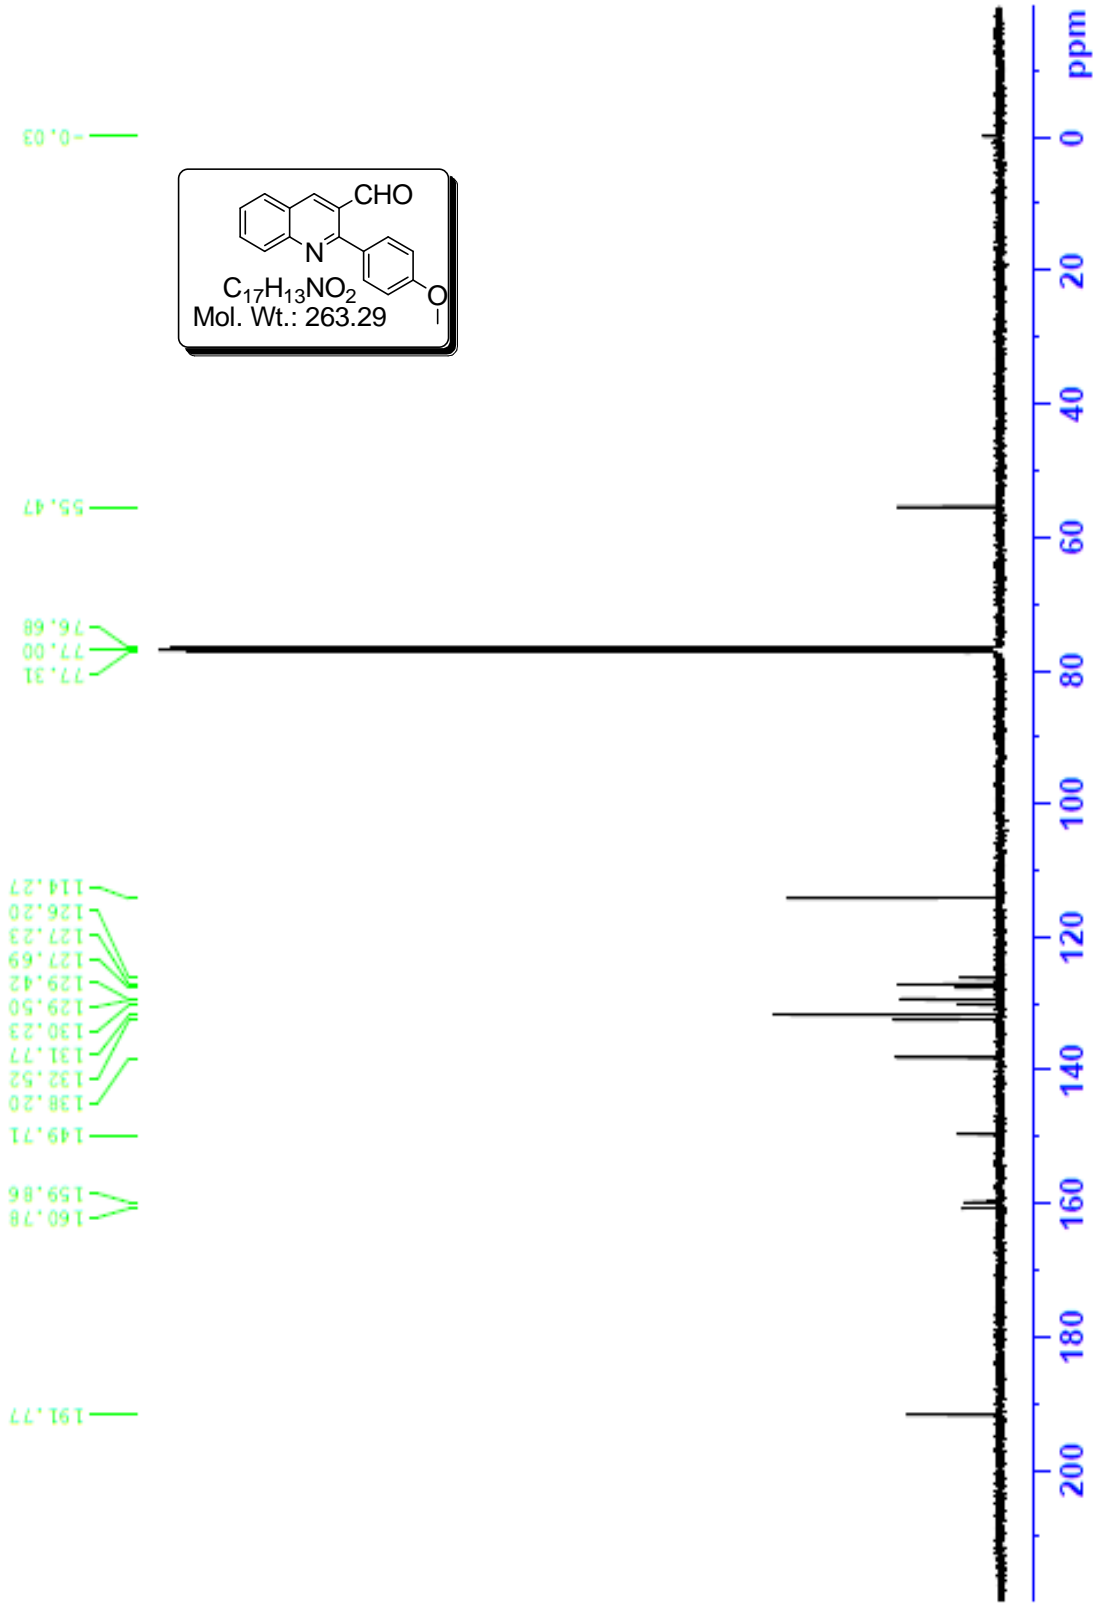

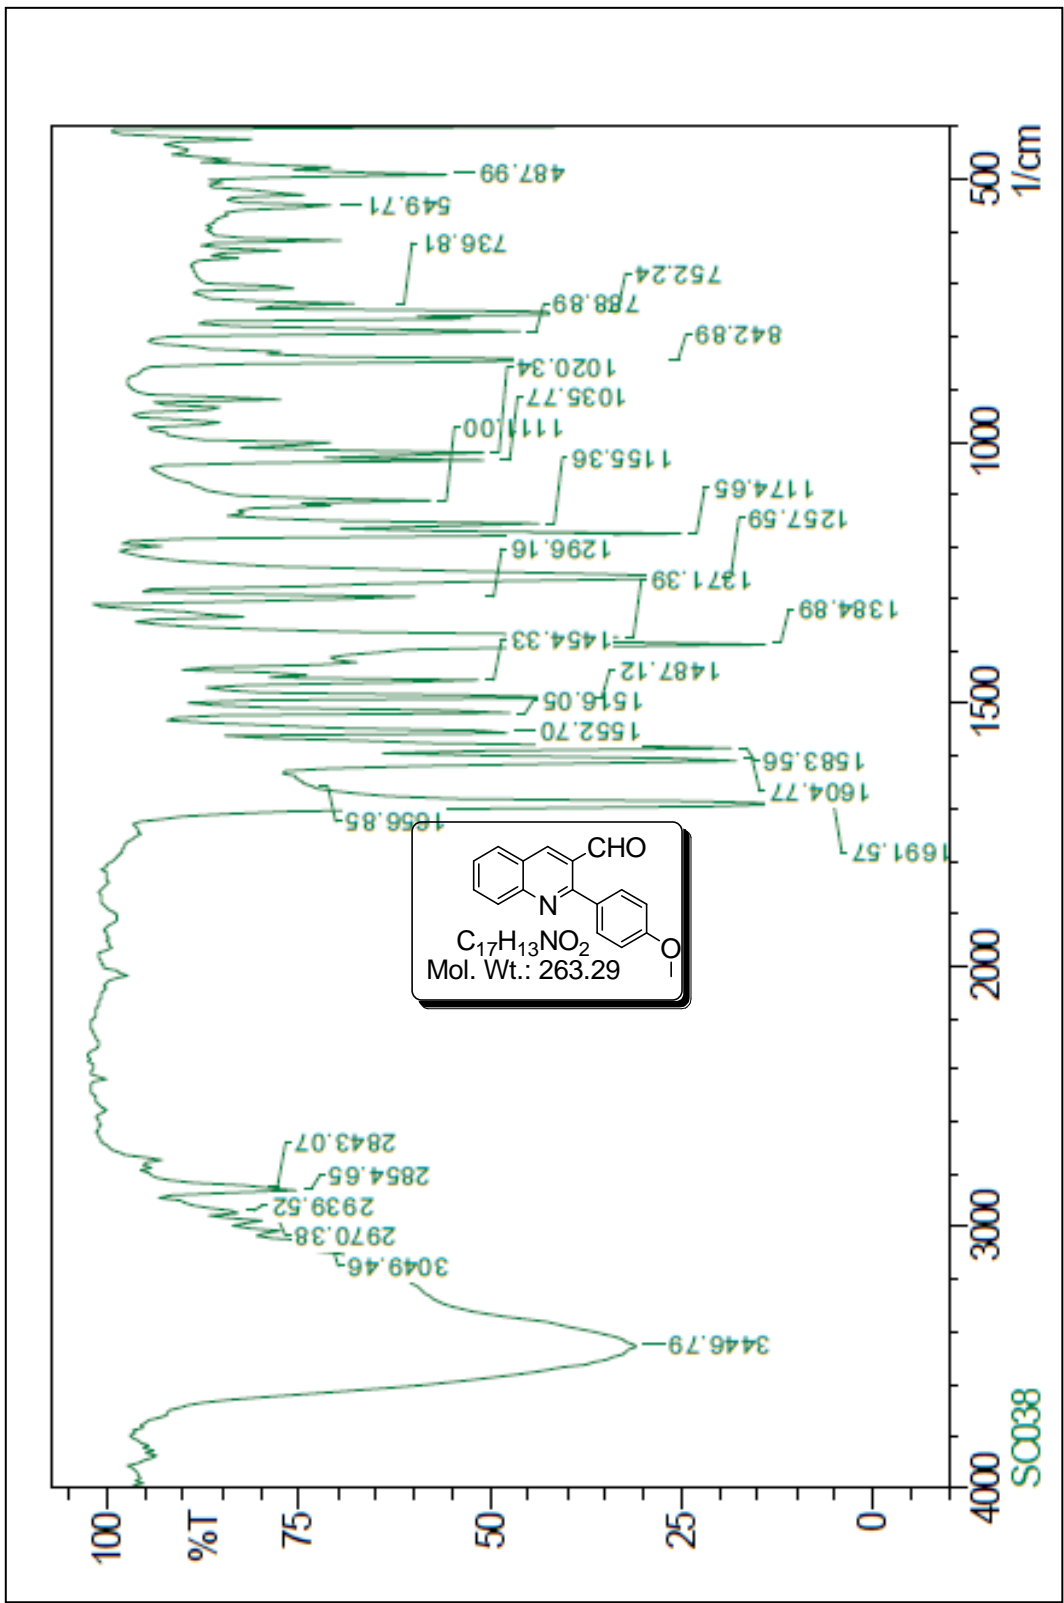

+MS, 2.7min #150

Intens.

[%]

264.1

100

80

60

40

20

130.2

0

m/z

900

800

700

600

500

400

300

200

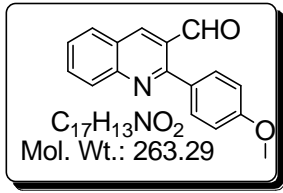



SY041

9.555  
8.391  
8.132  
8.122  
7.787  
7.759  
7.626  
7.484  
7.415  
7.138  
6.992  
6.953

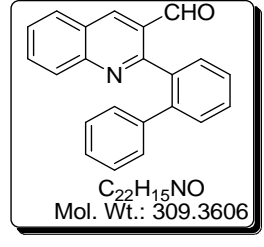

-0.037

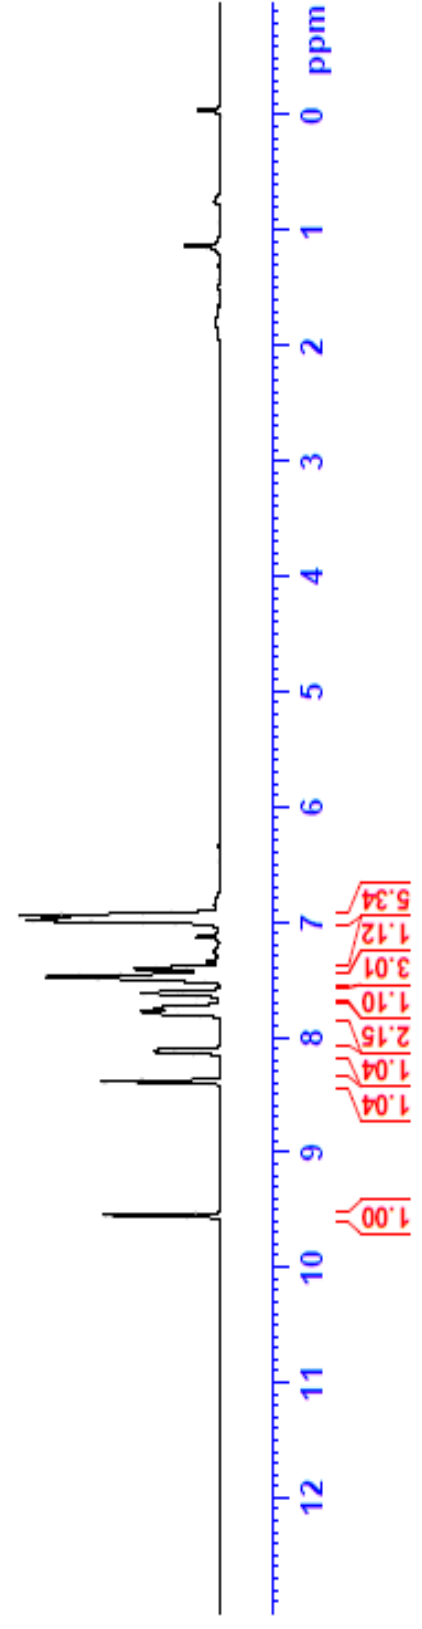

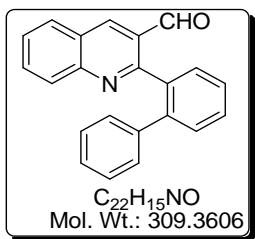

-0.12

76.22  
75.90  
75.58

159.65  
148.48  
140.70  
138.45  
135.75  
135.35  
131.31  
129.71  
128.83  
128.72  
128.66  
128.39  
128.37  
127.21  
126.98  
126.31  
126.29  
126.17  
125.33

188.78

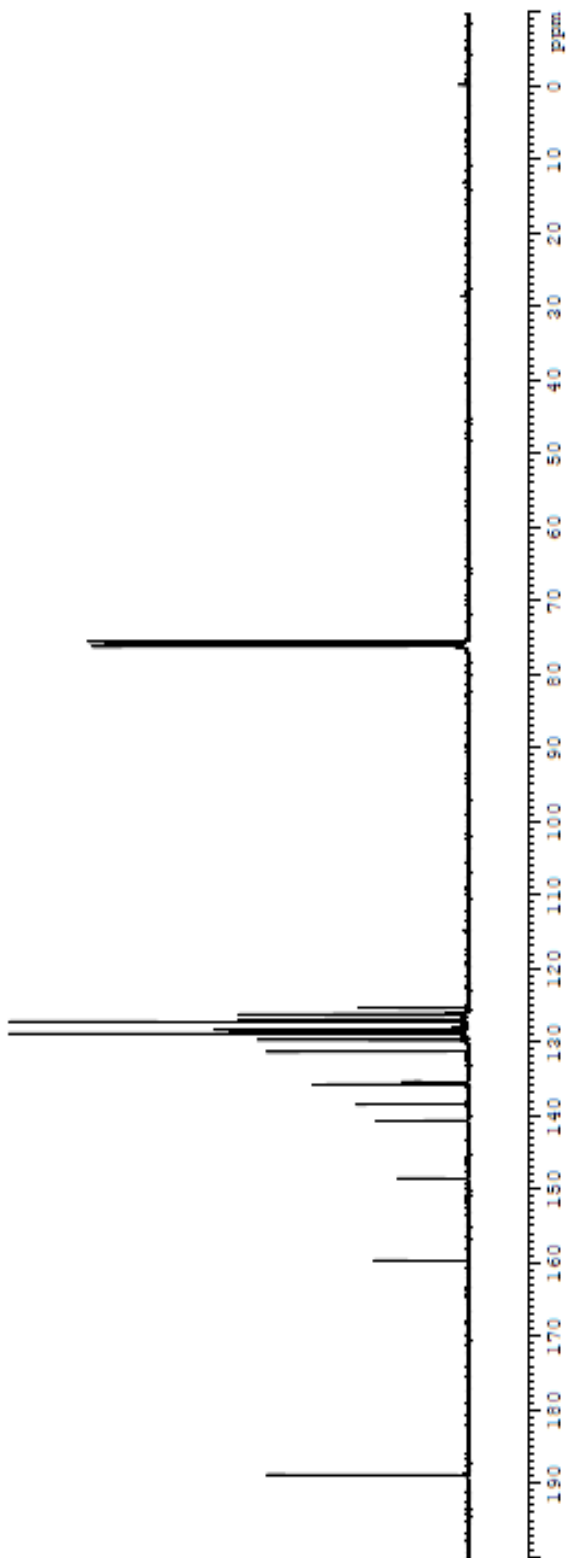

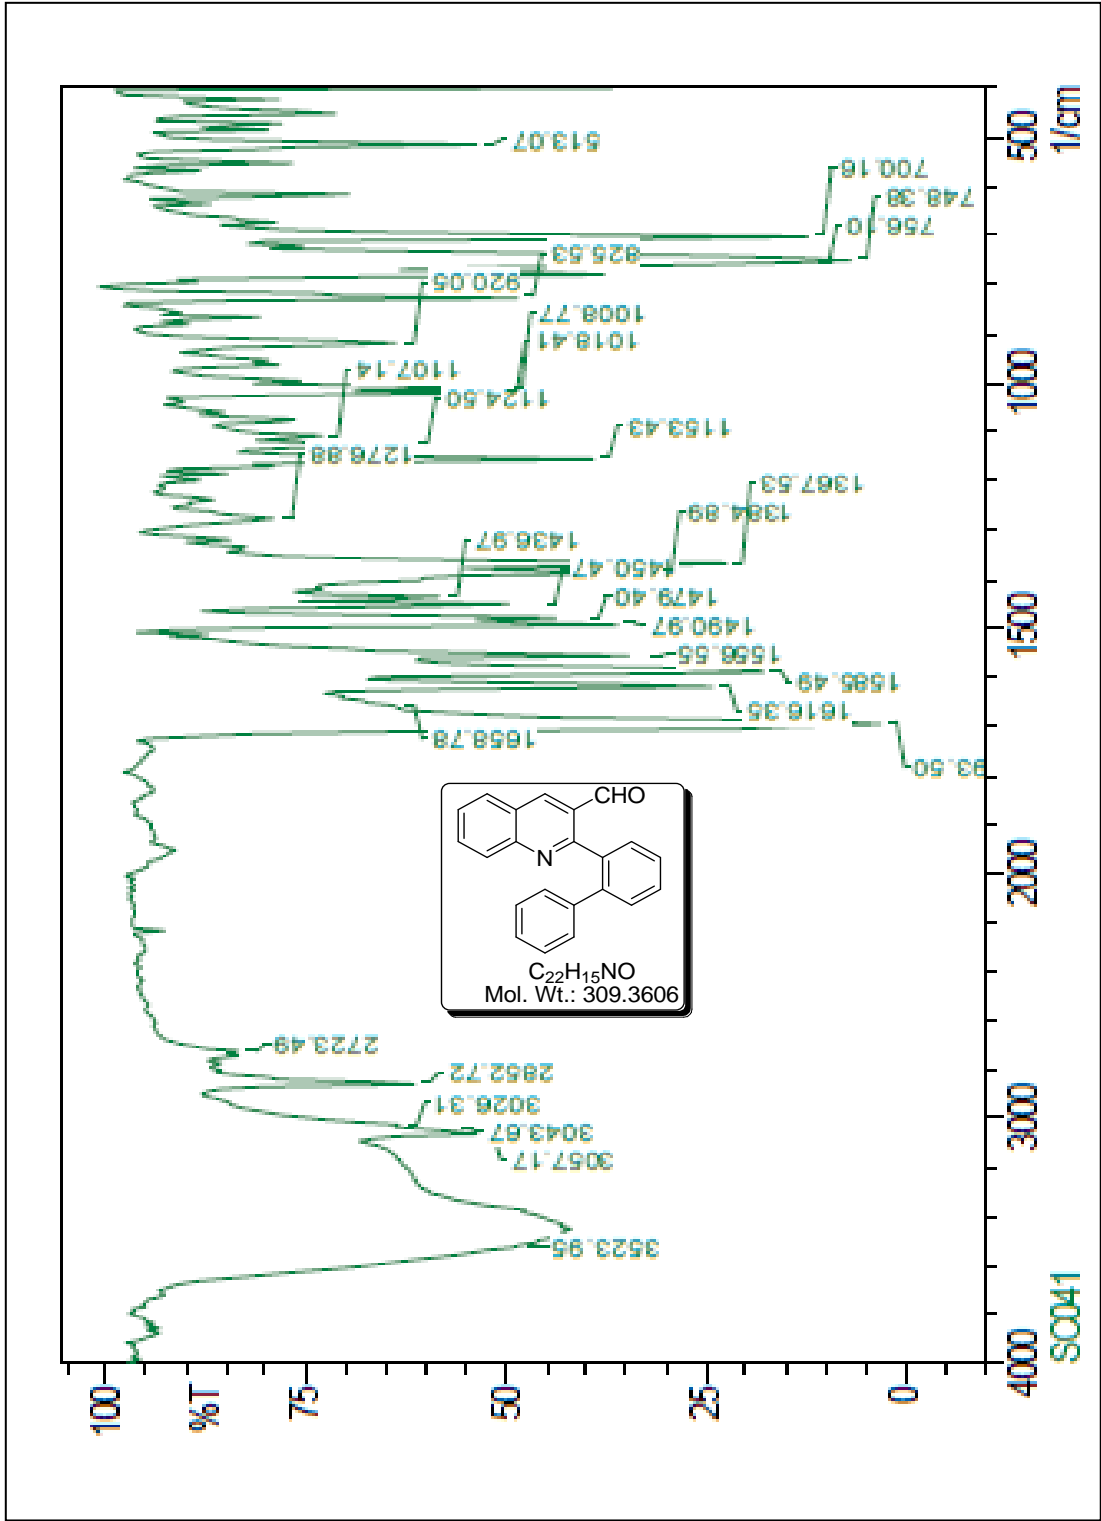

+MS, 3.2min #176

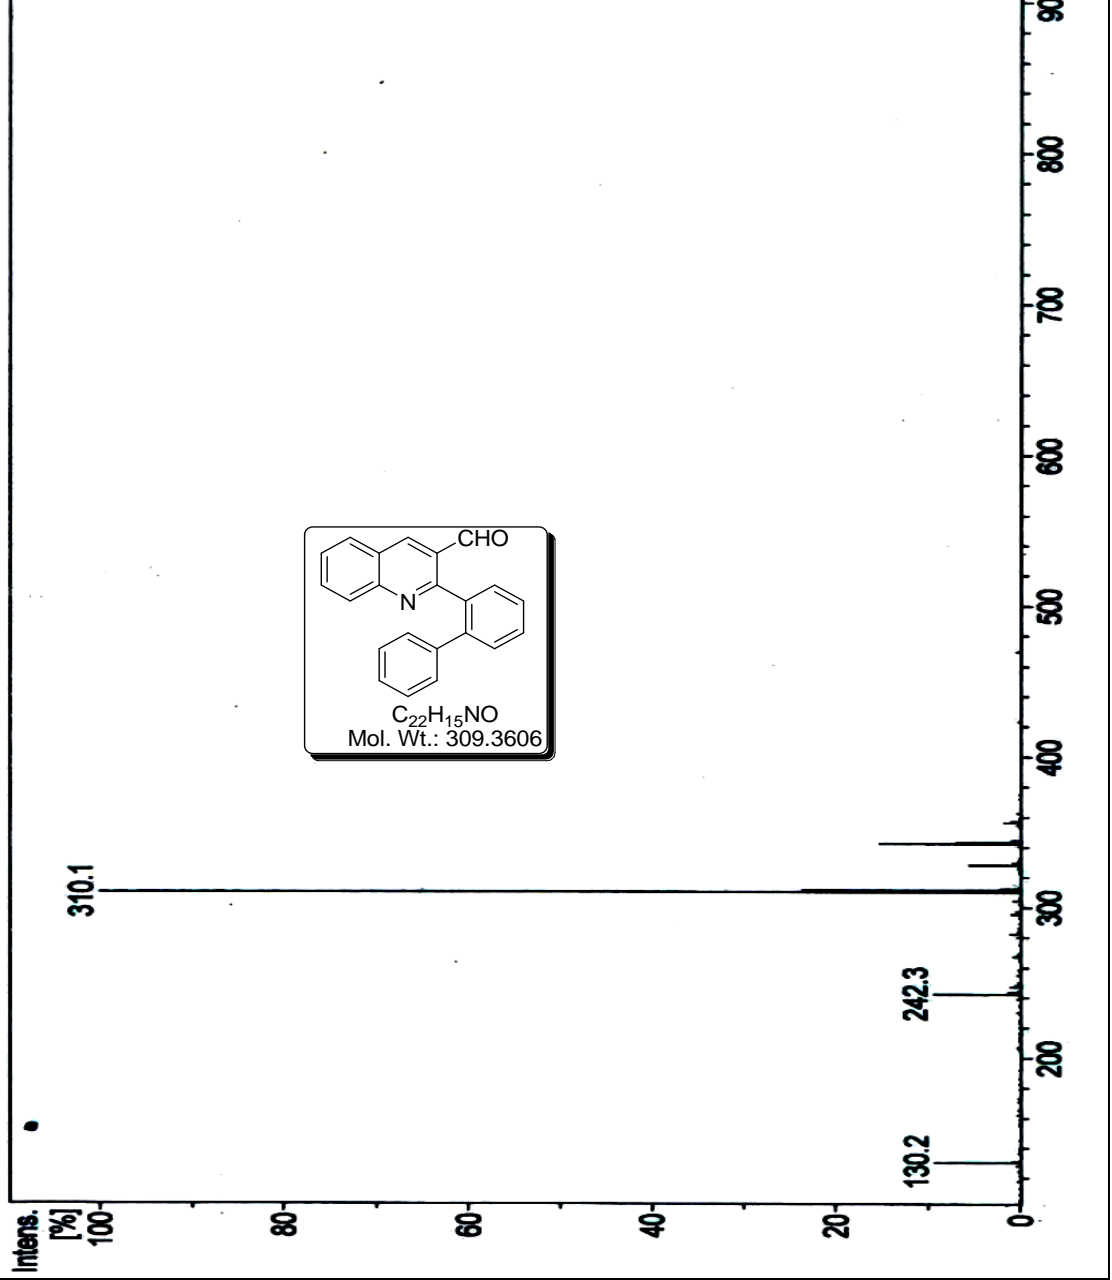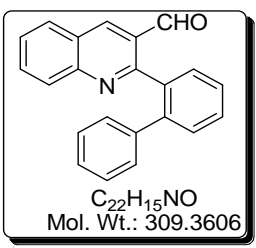

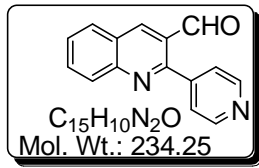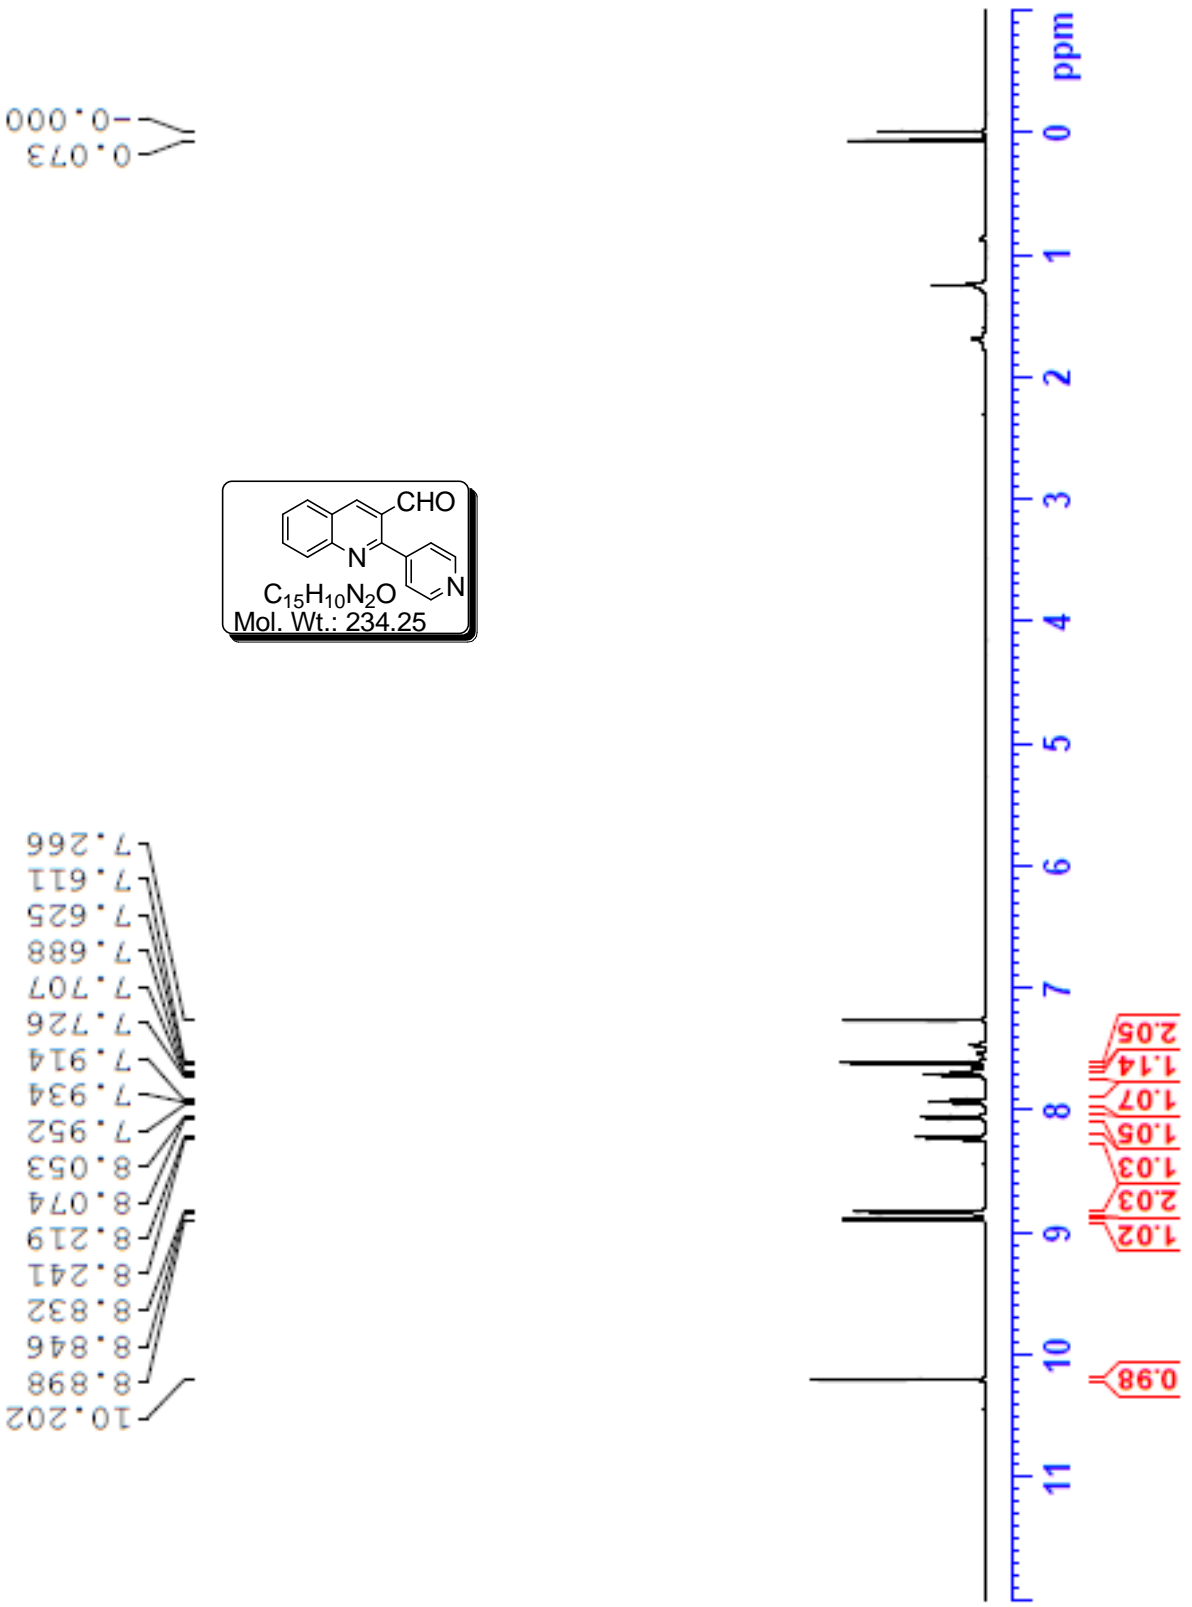

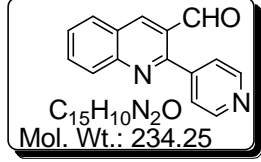

77.35  
77.03  
76.71

157.50  
150.19  
149.59  
145.52  
139.09  
133.17  
129.79  
129.54  
128.31  
127.40  
126.77  
124.58

190.23

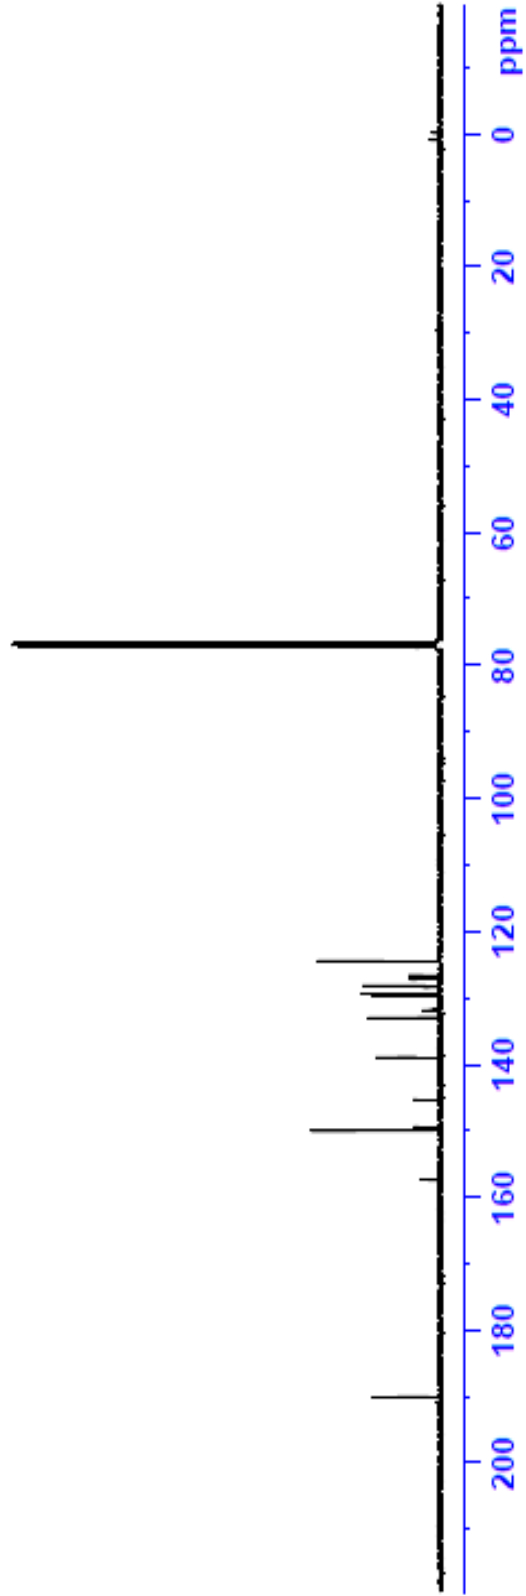

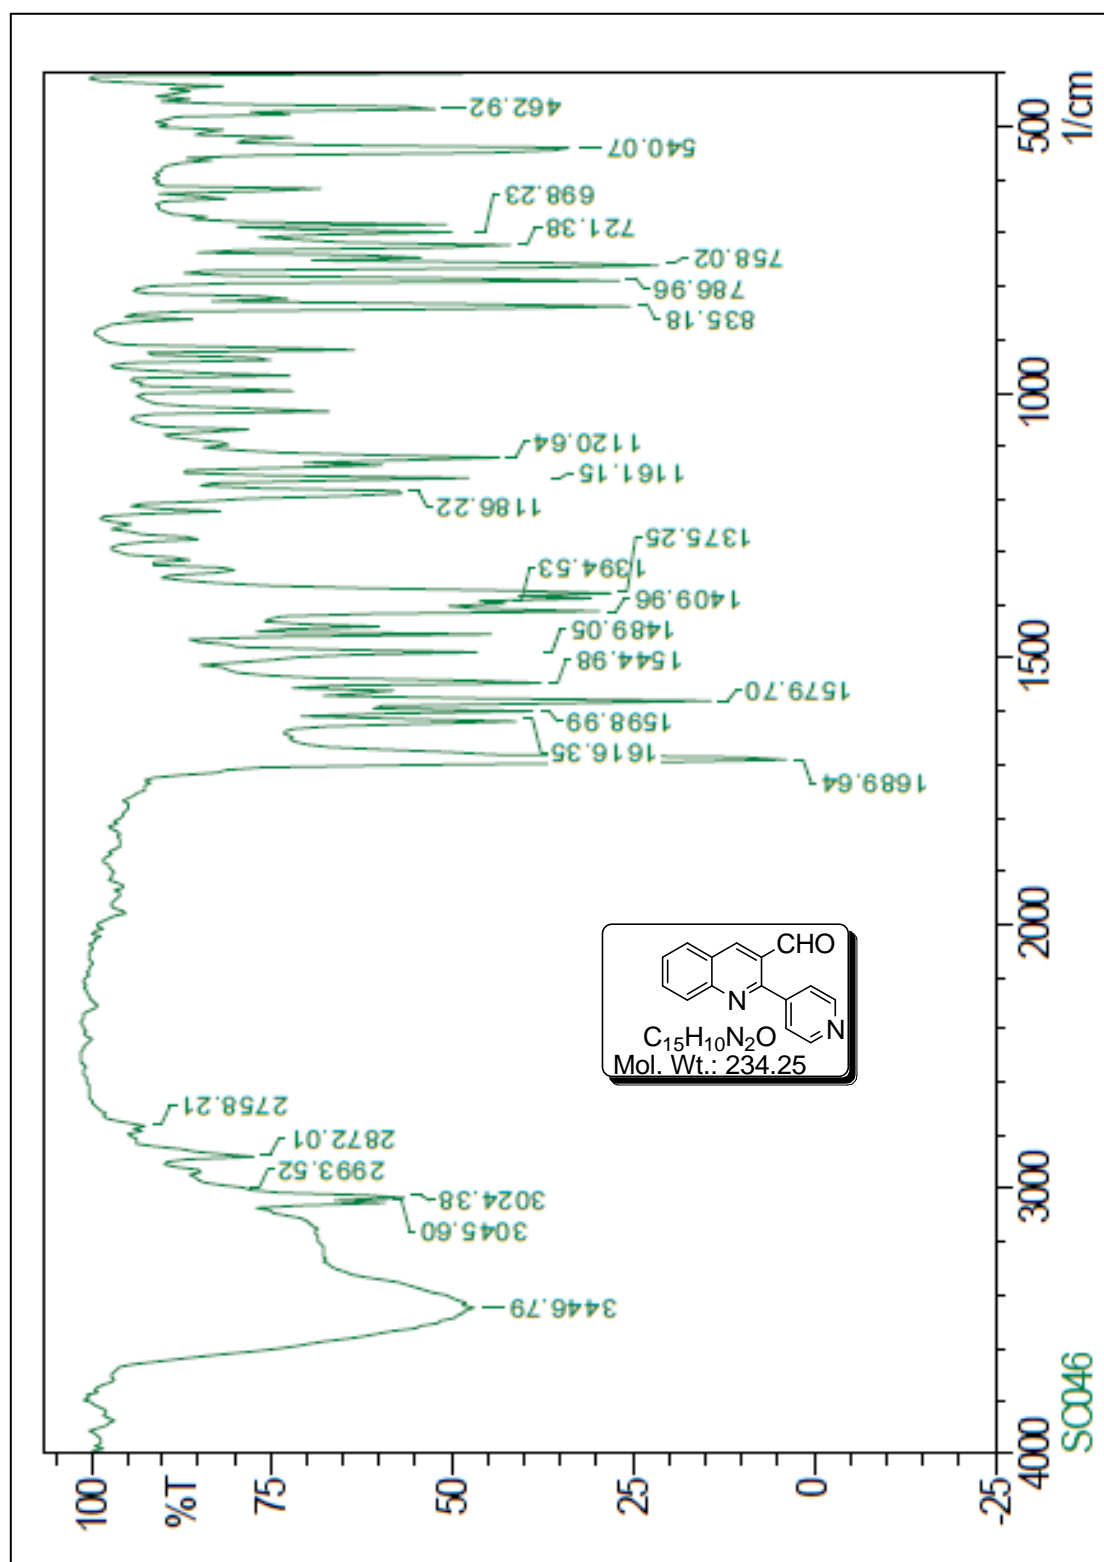

+MS, 1.0min #54

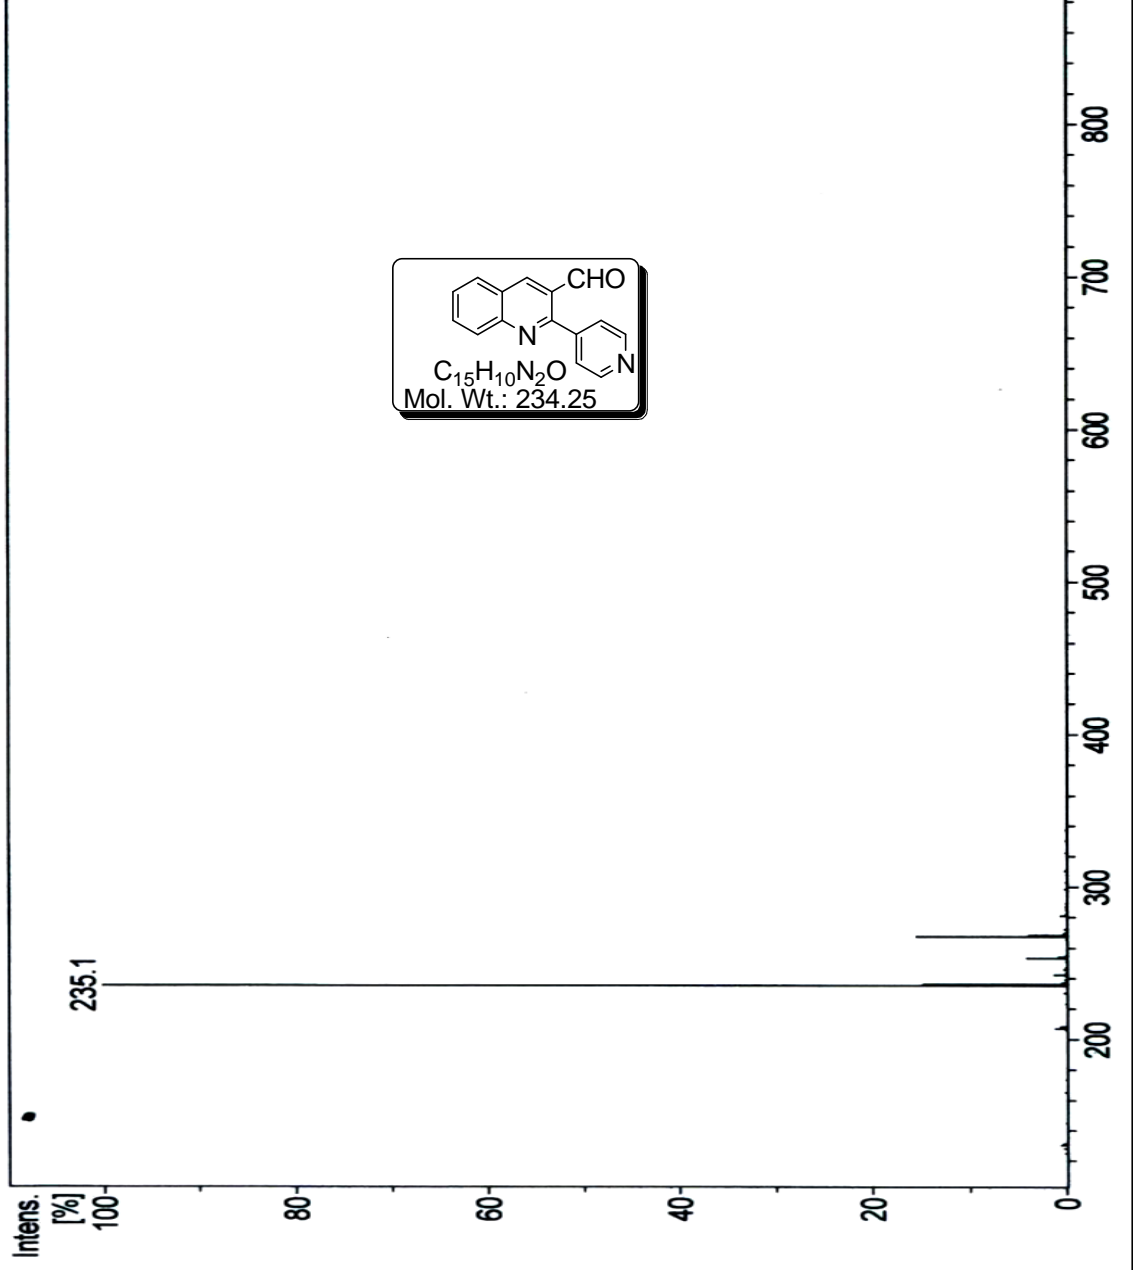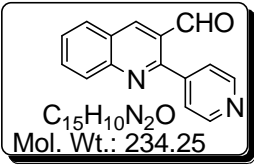



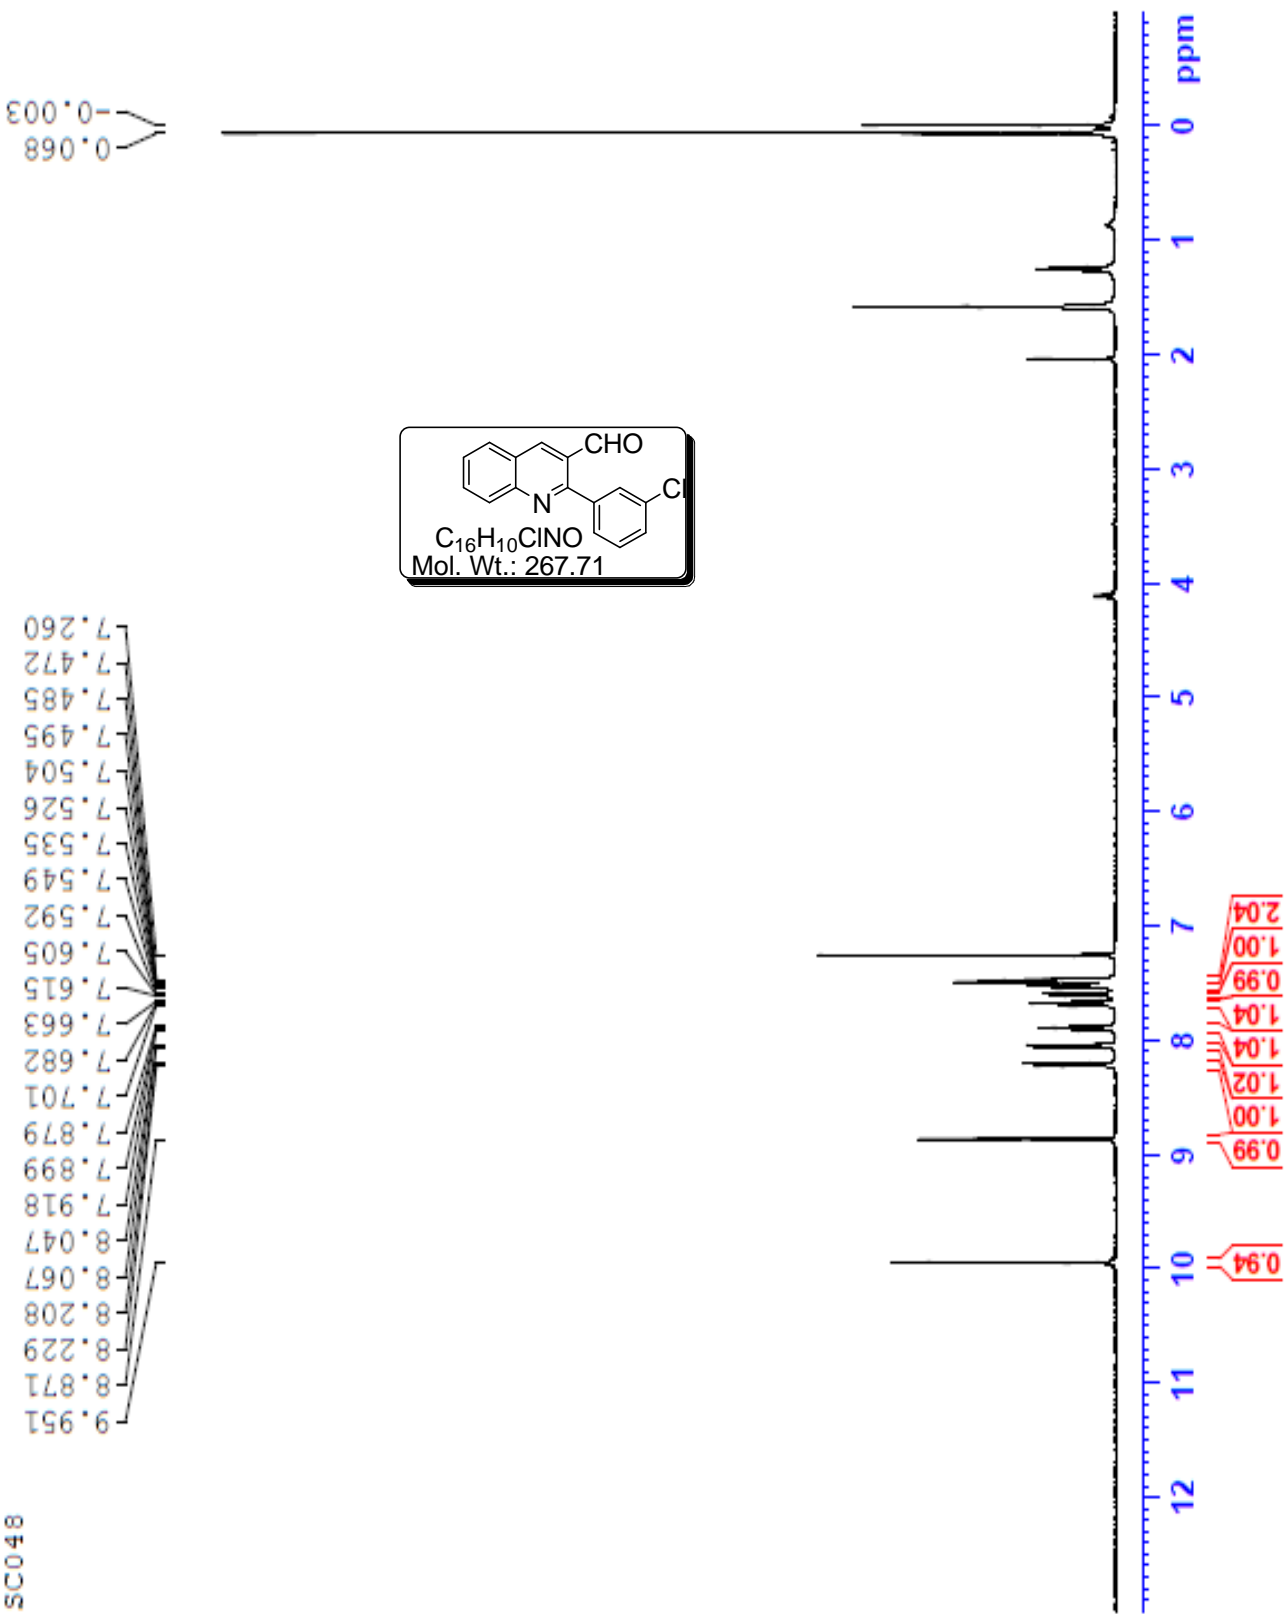

SC048

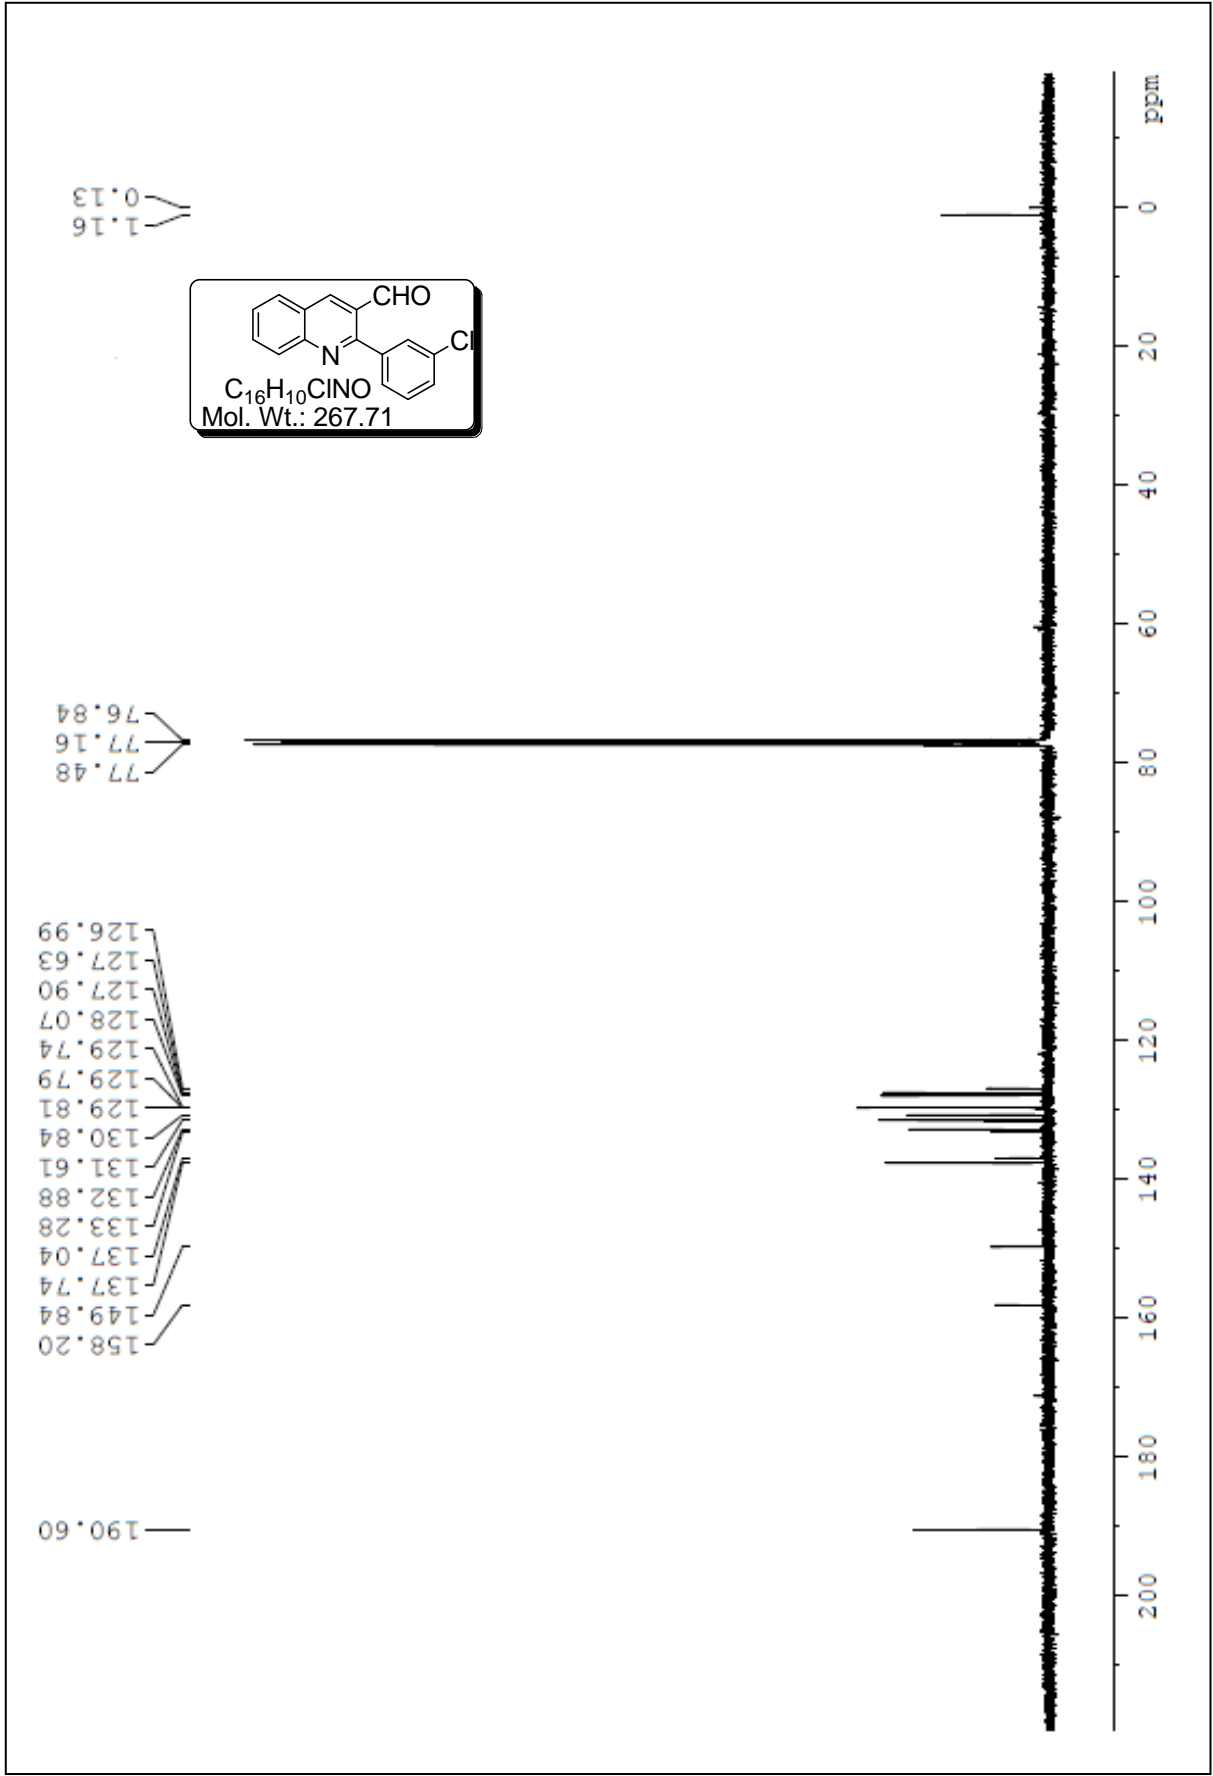

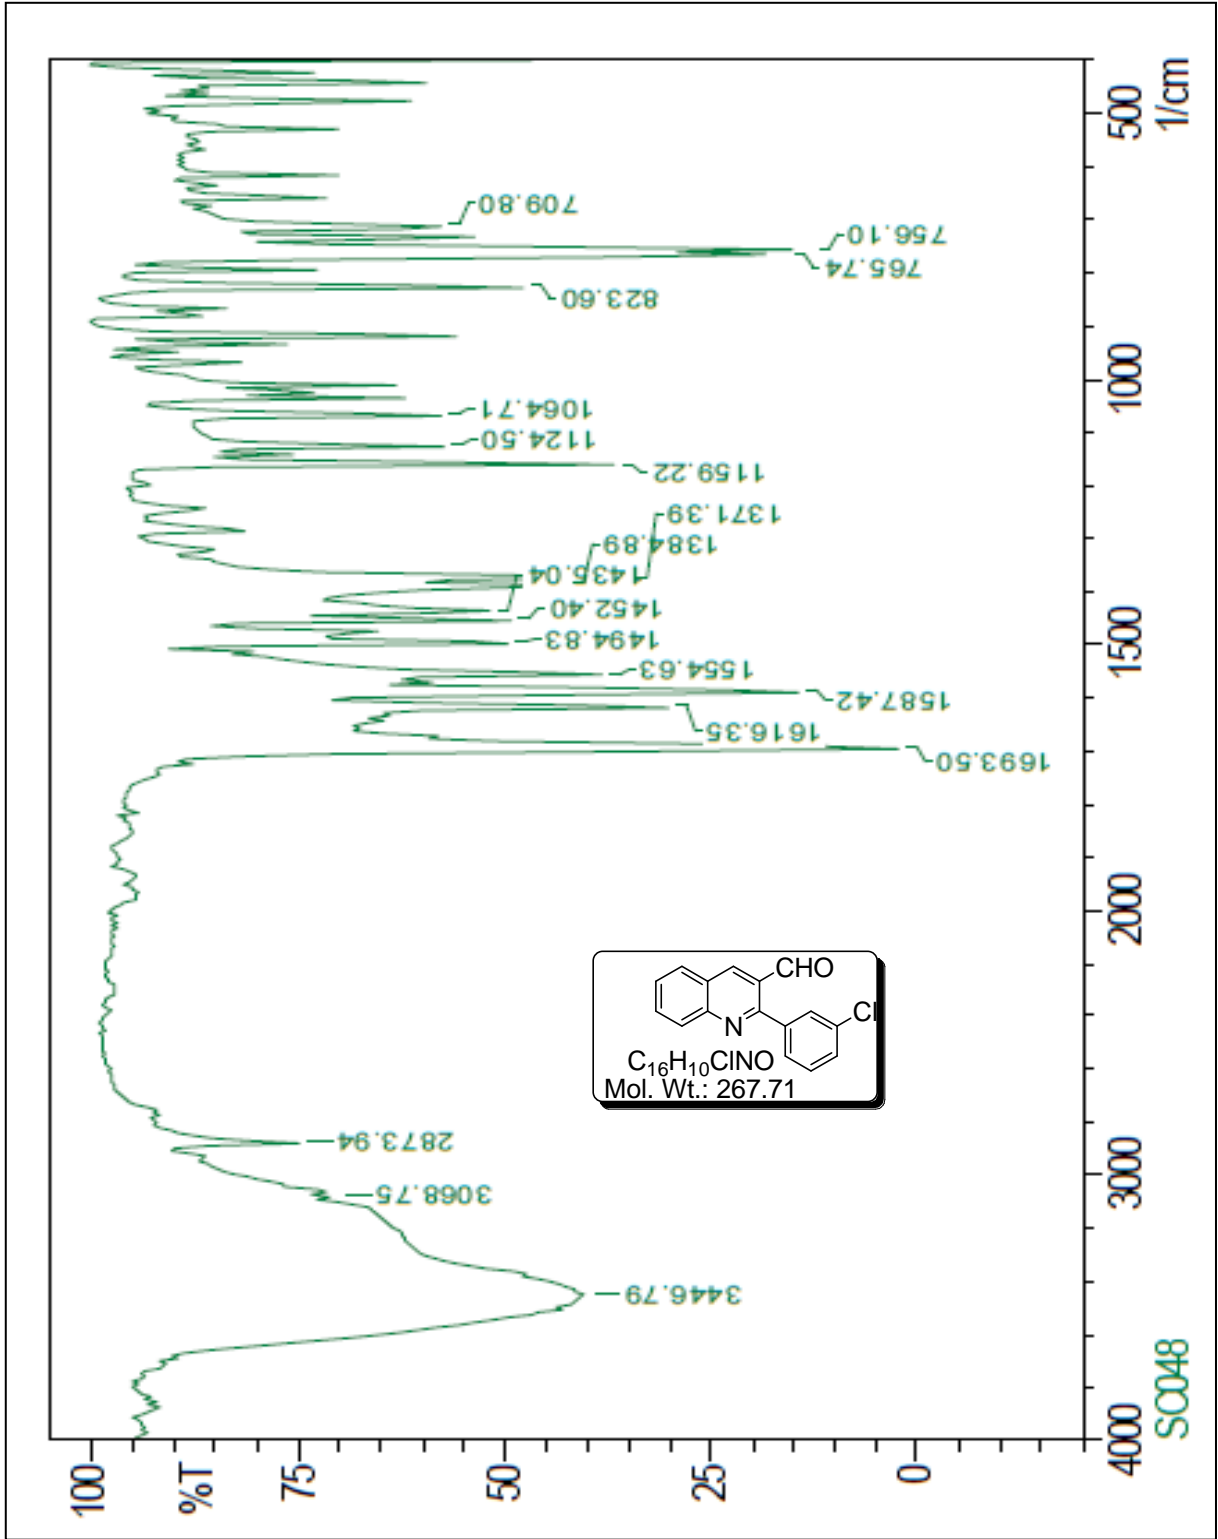

+MS, 2.9min #157

Intens.

[%]

268.0

130.2

242.2

206.0

m/z

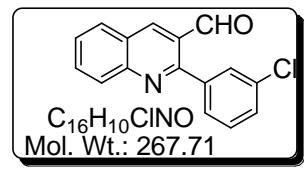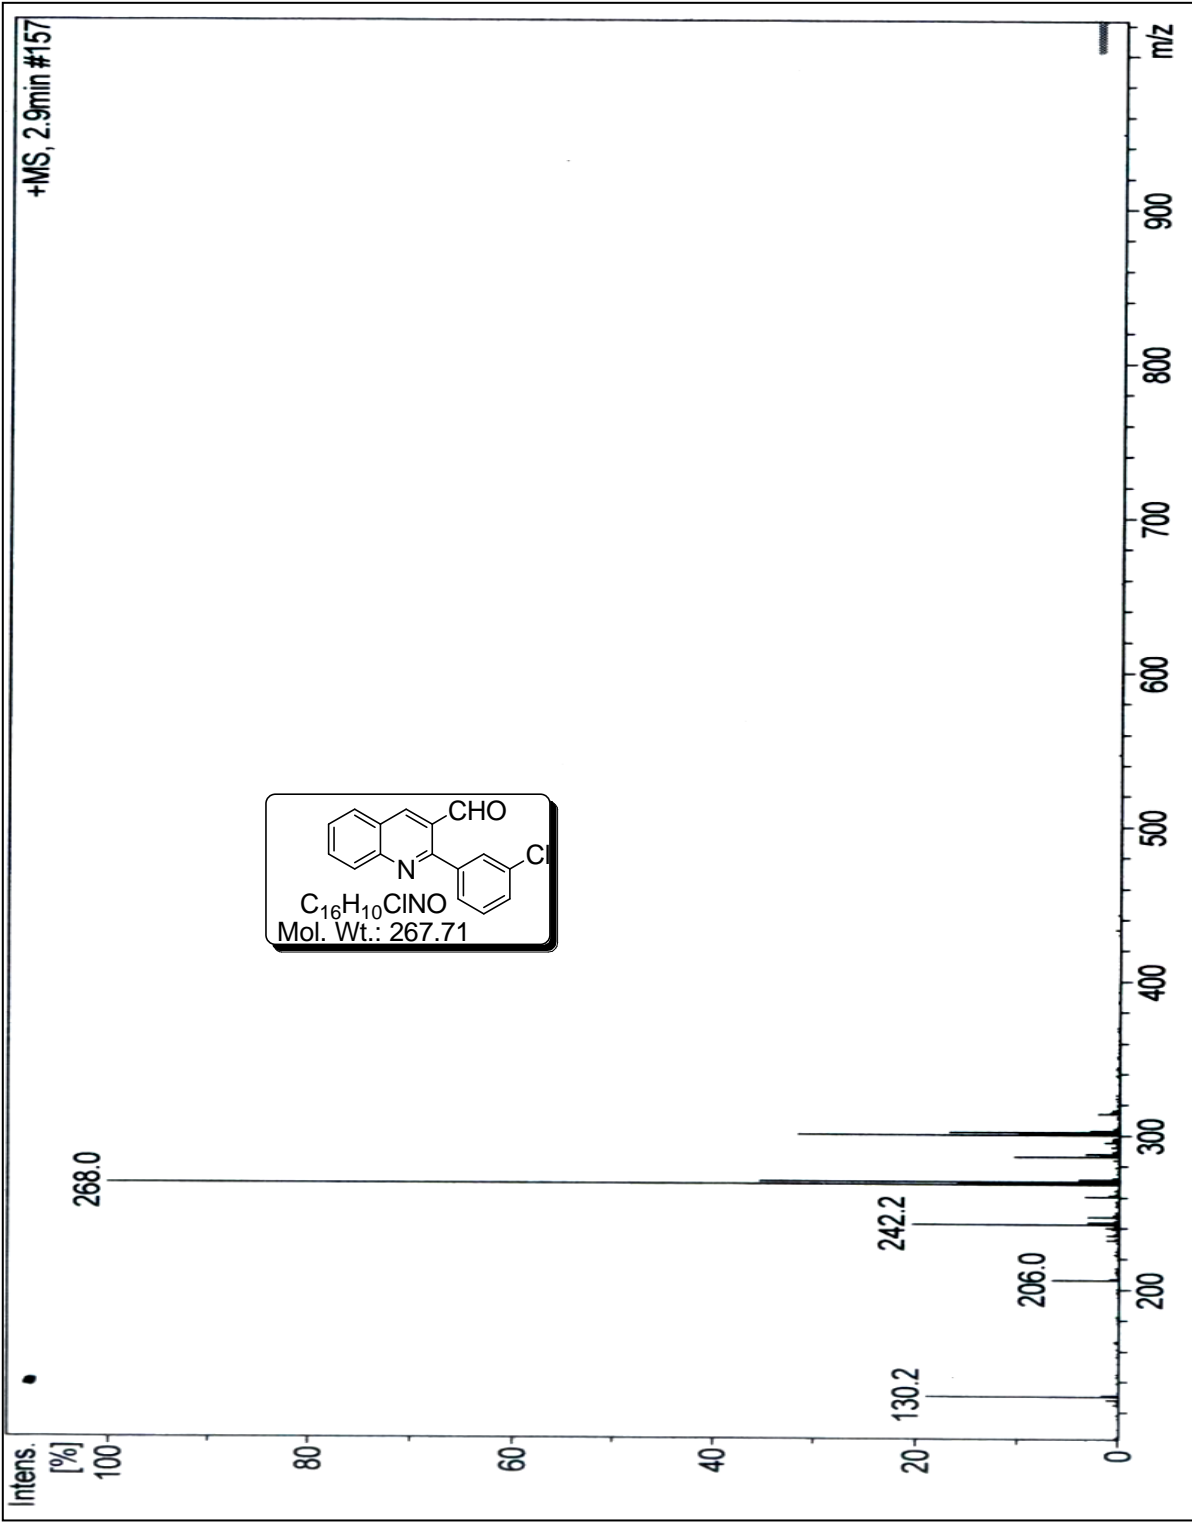

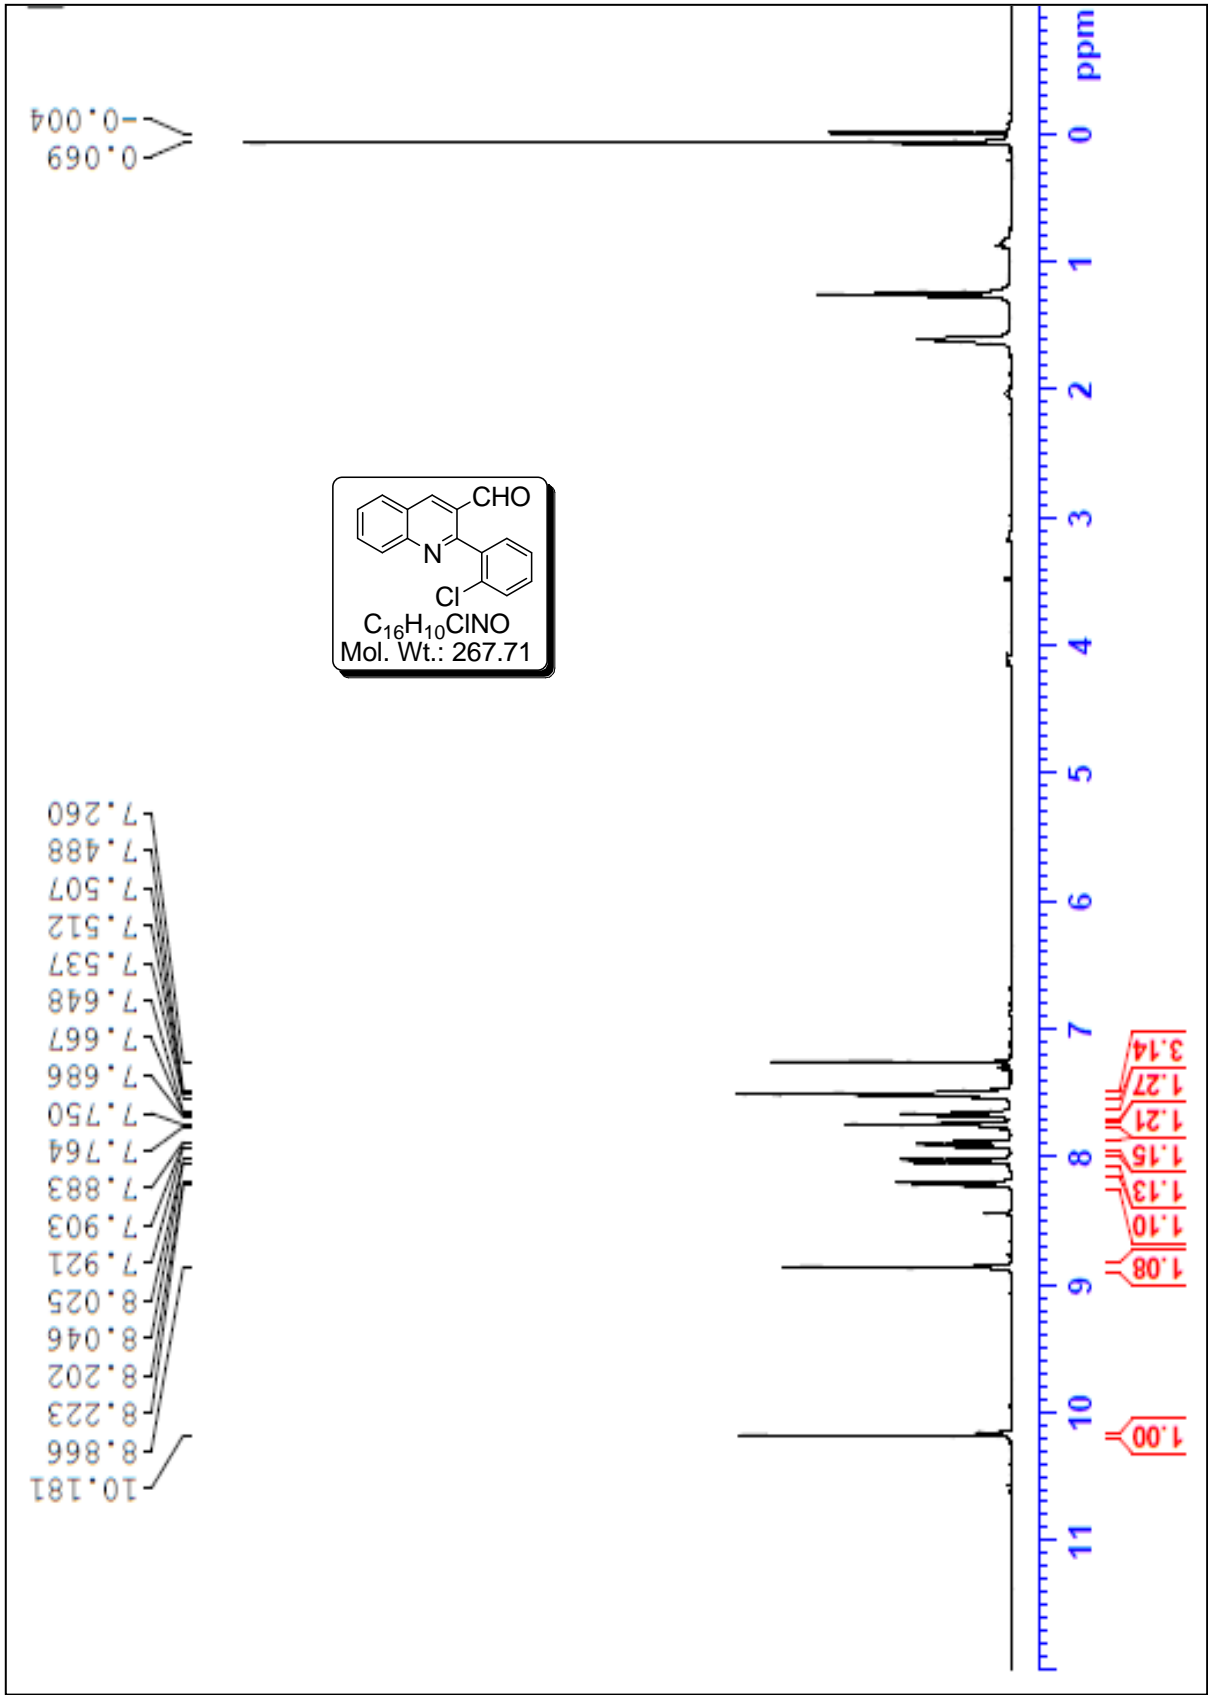

SC049

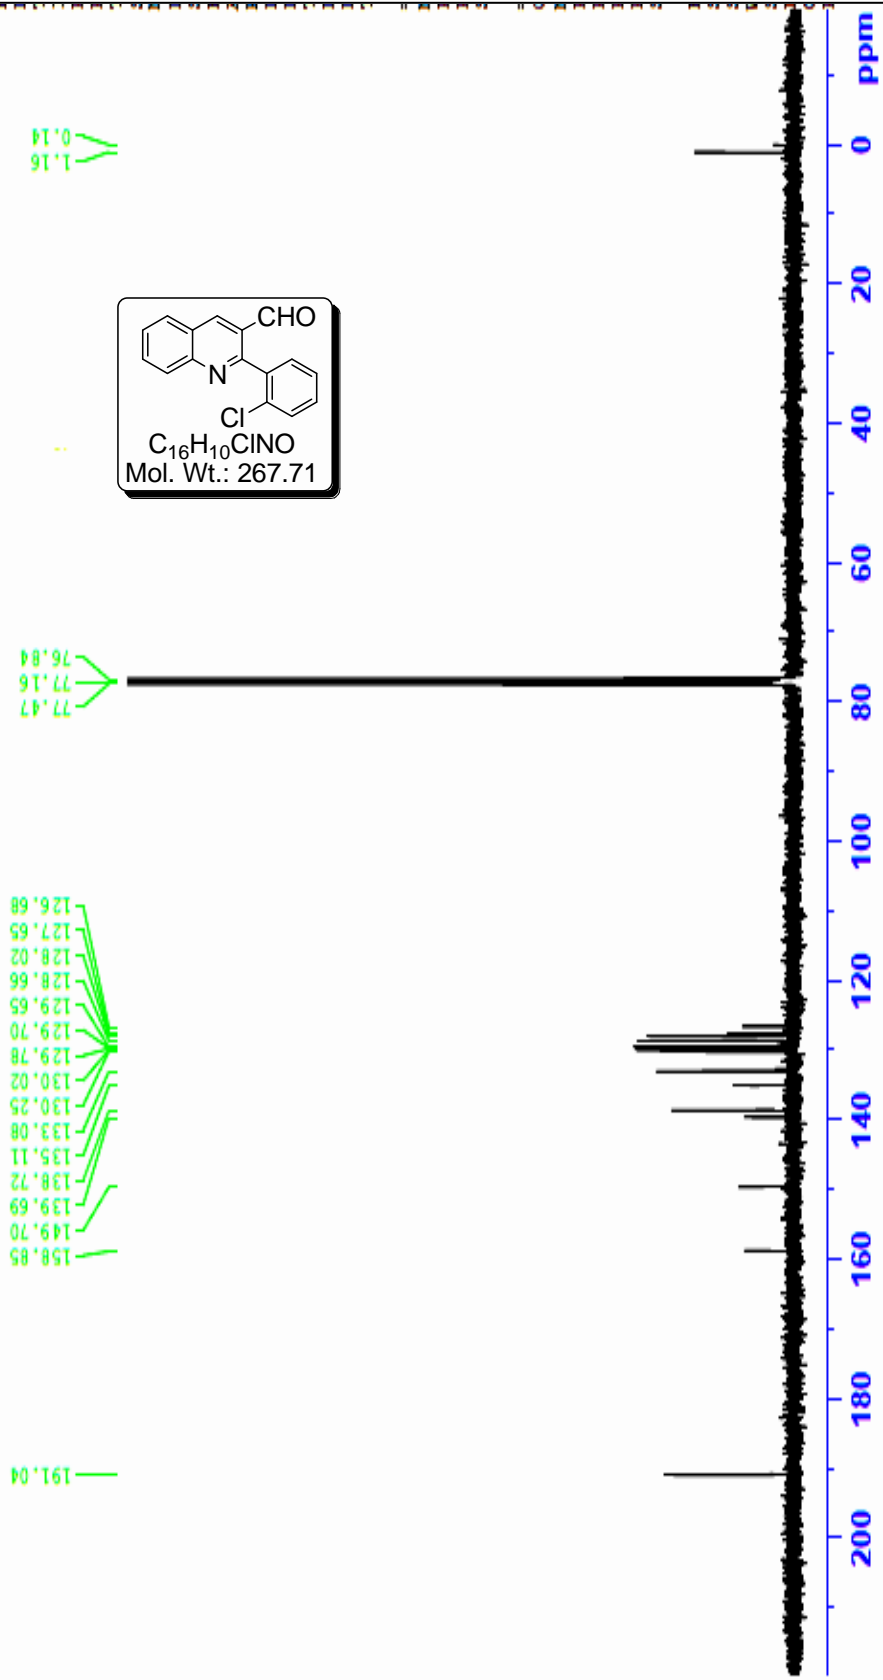

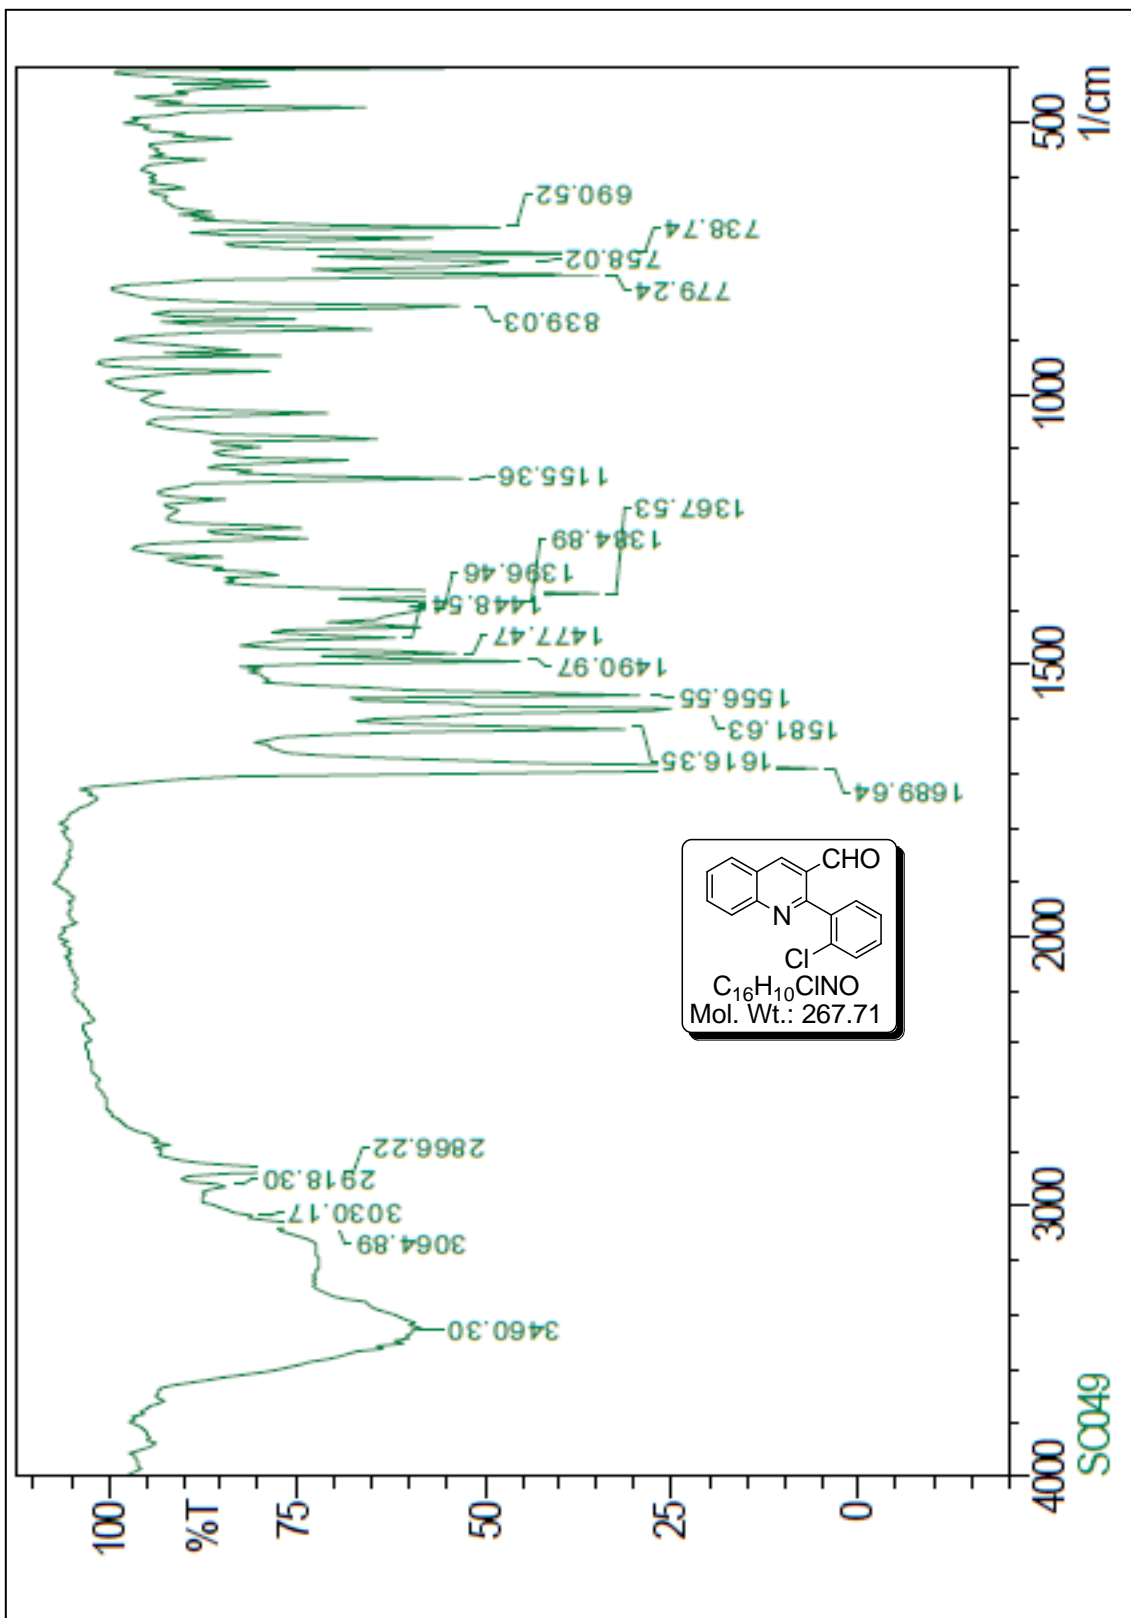

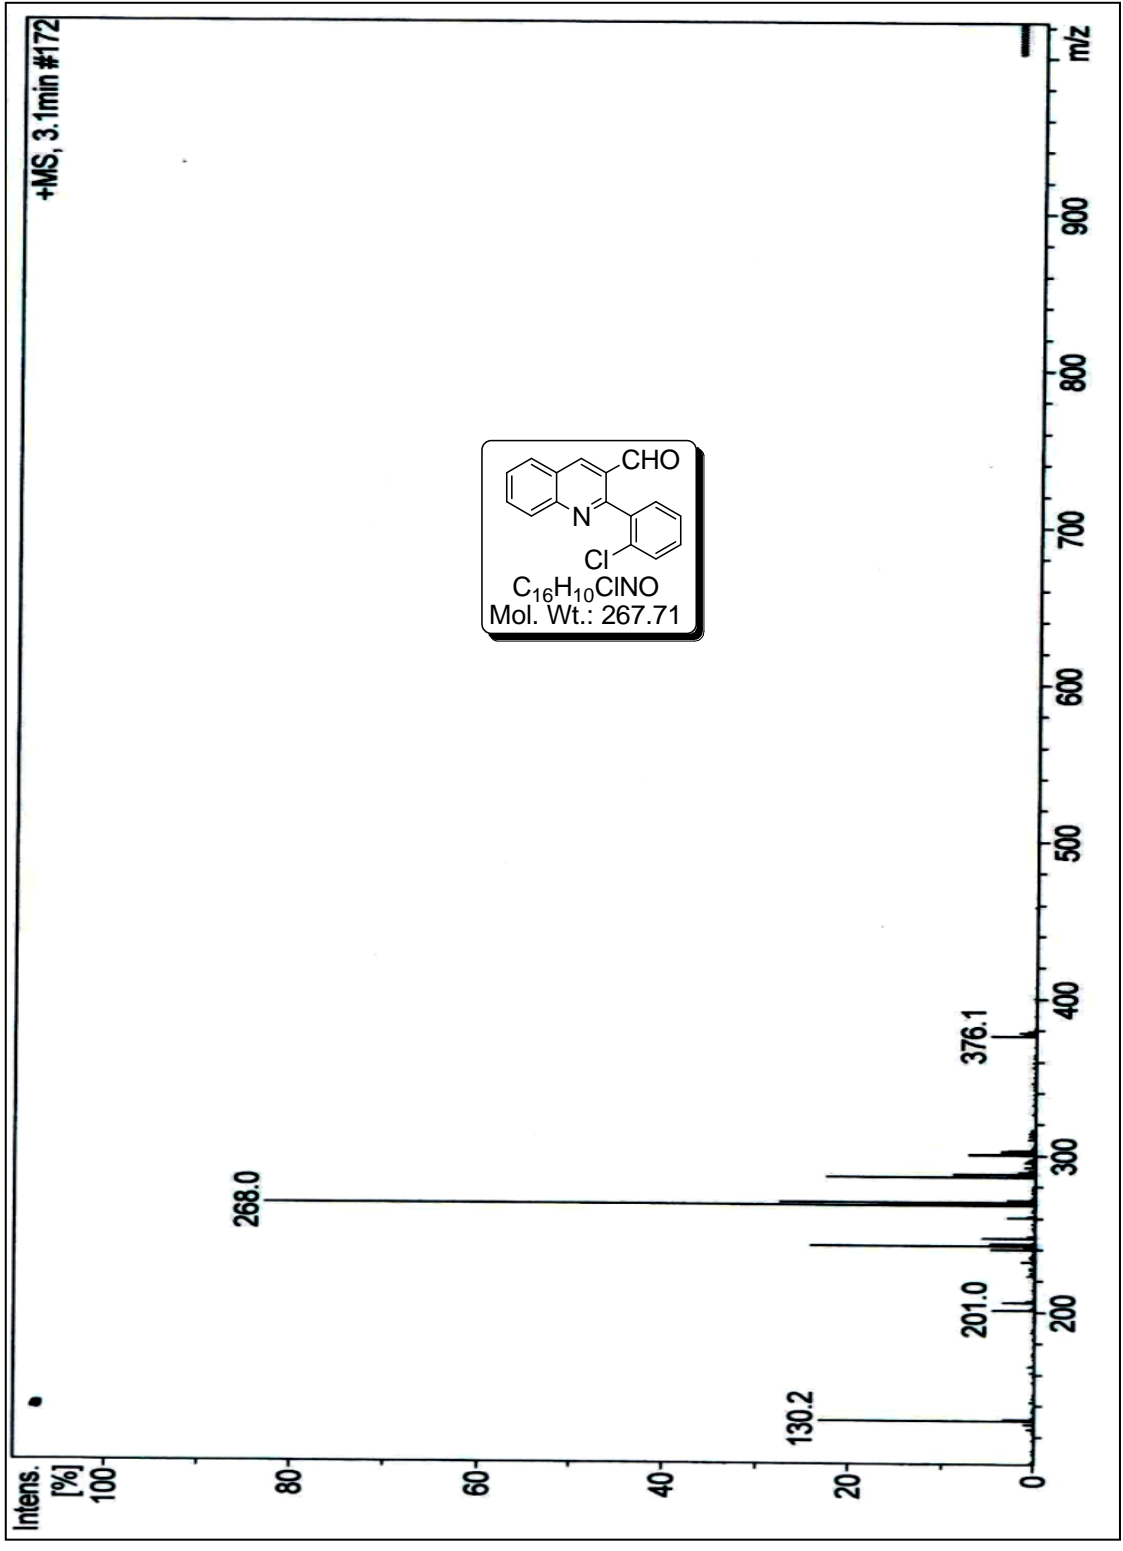



0.071  
-0.001

3.912  
7.147  
7.160  
7.166  
7.178  
7.263  
7.629  
7.632  
7.649  
7.667  
7.669  
7.844  
7.847  
7.865  
7.869  
7.882  
7.886  
8.016  
8.021  
8.035  
8.039  
8.176  
8.197  
8.351  
8.355  
8.363  
8.368  
8.796  
9.948

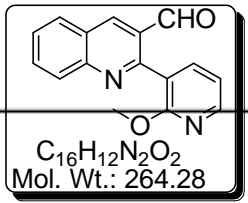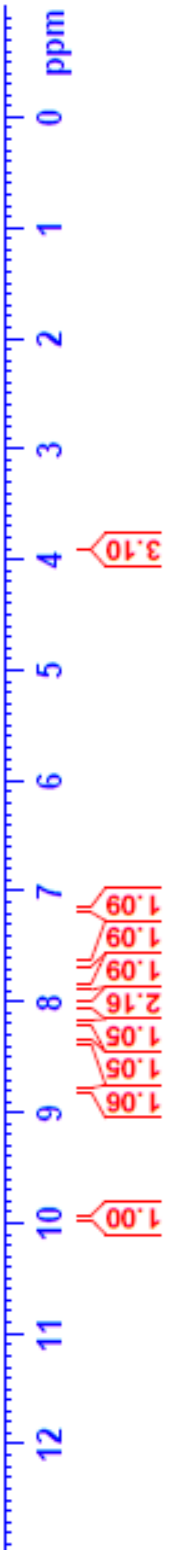

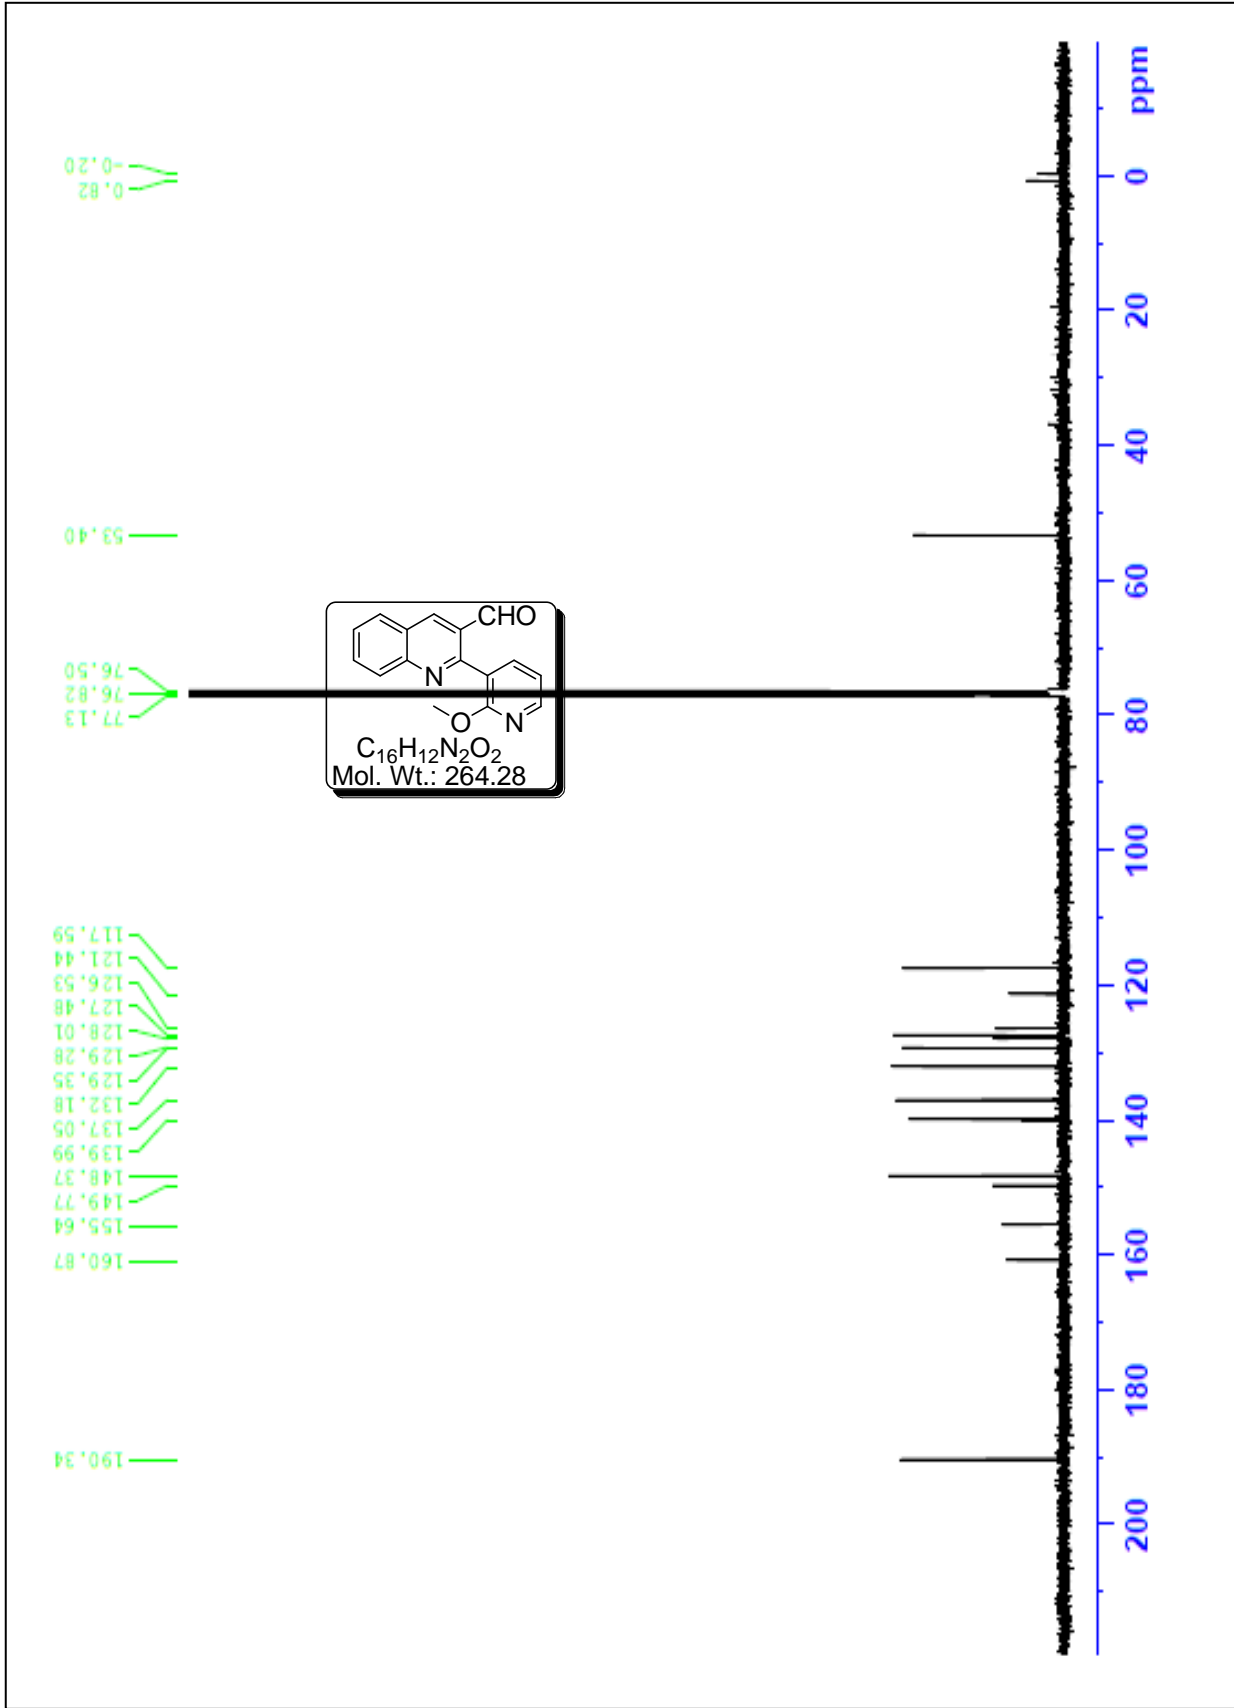

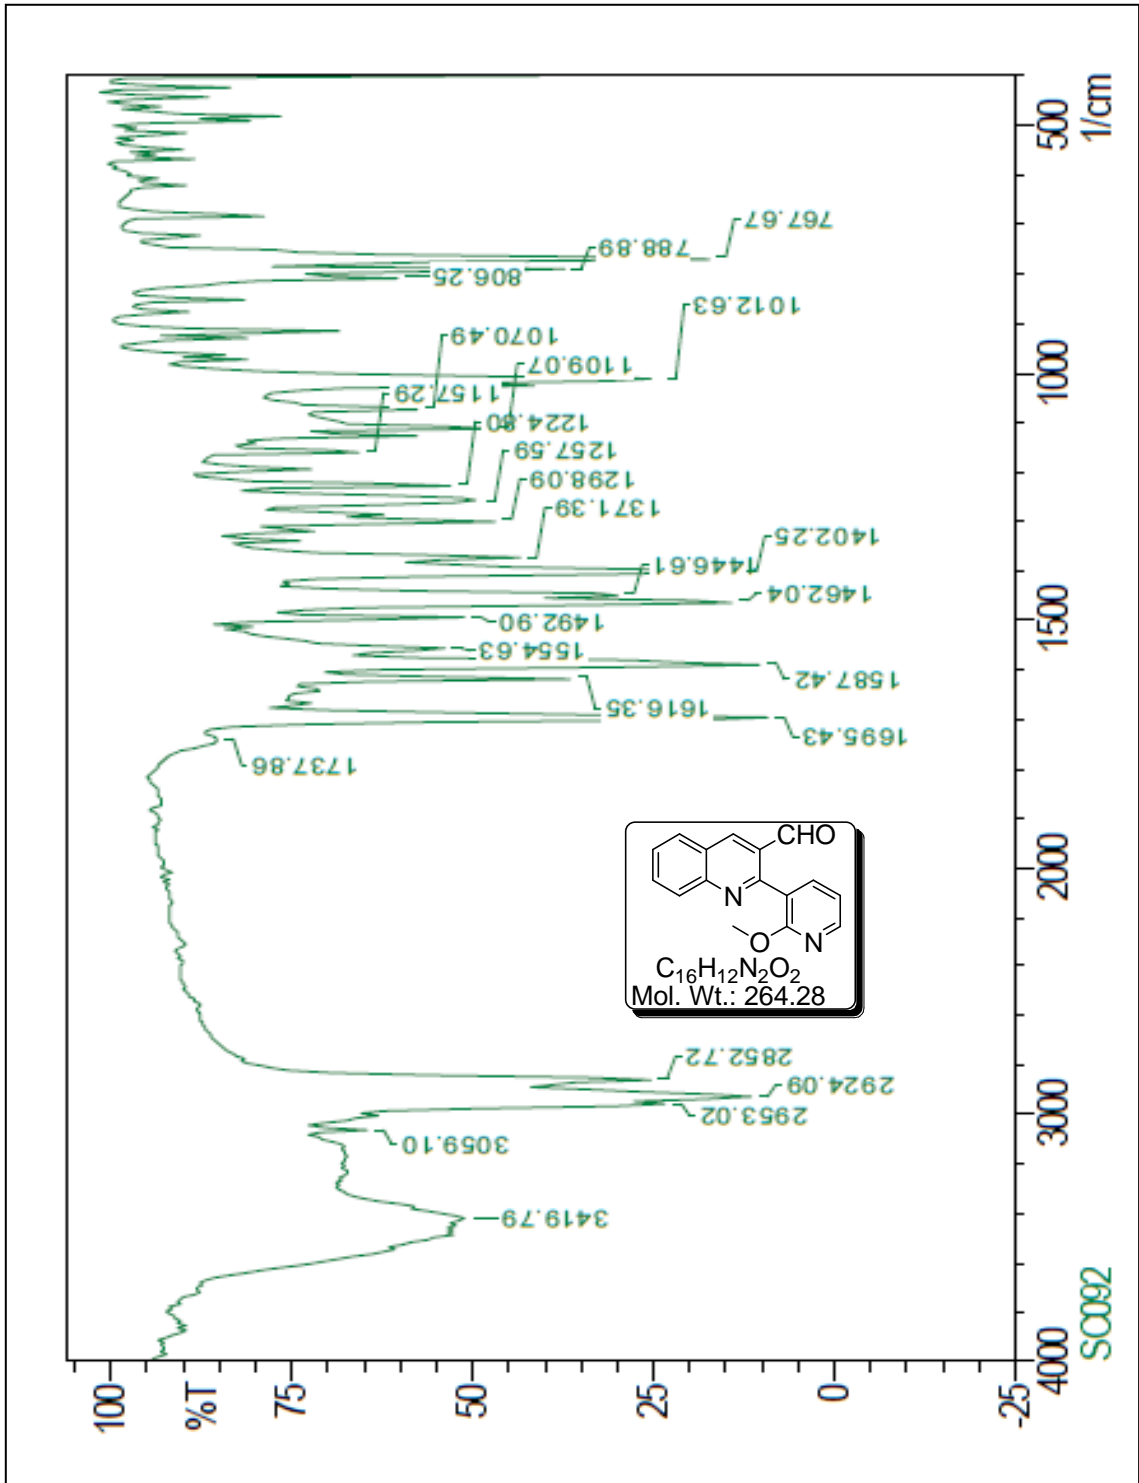

+MS, 2.2min #120

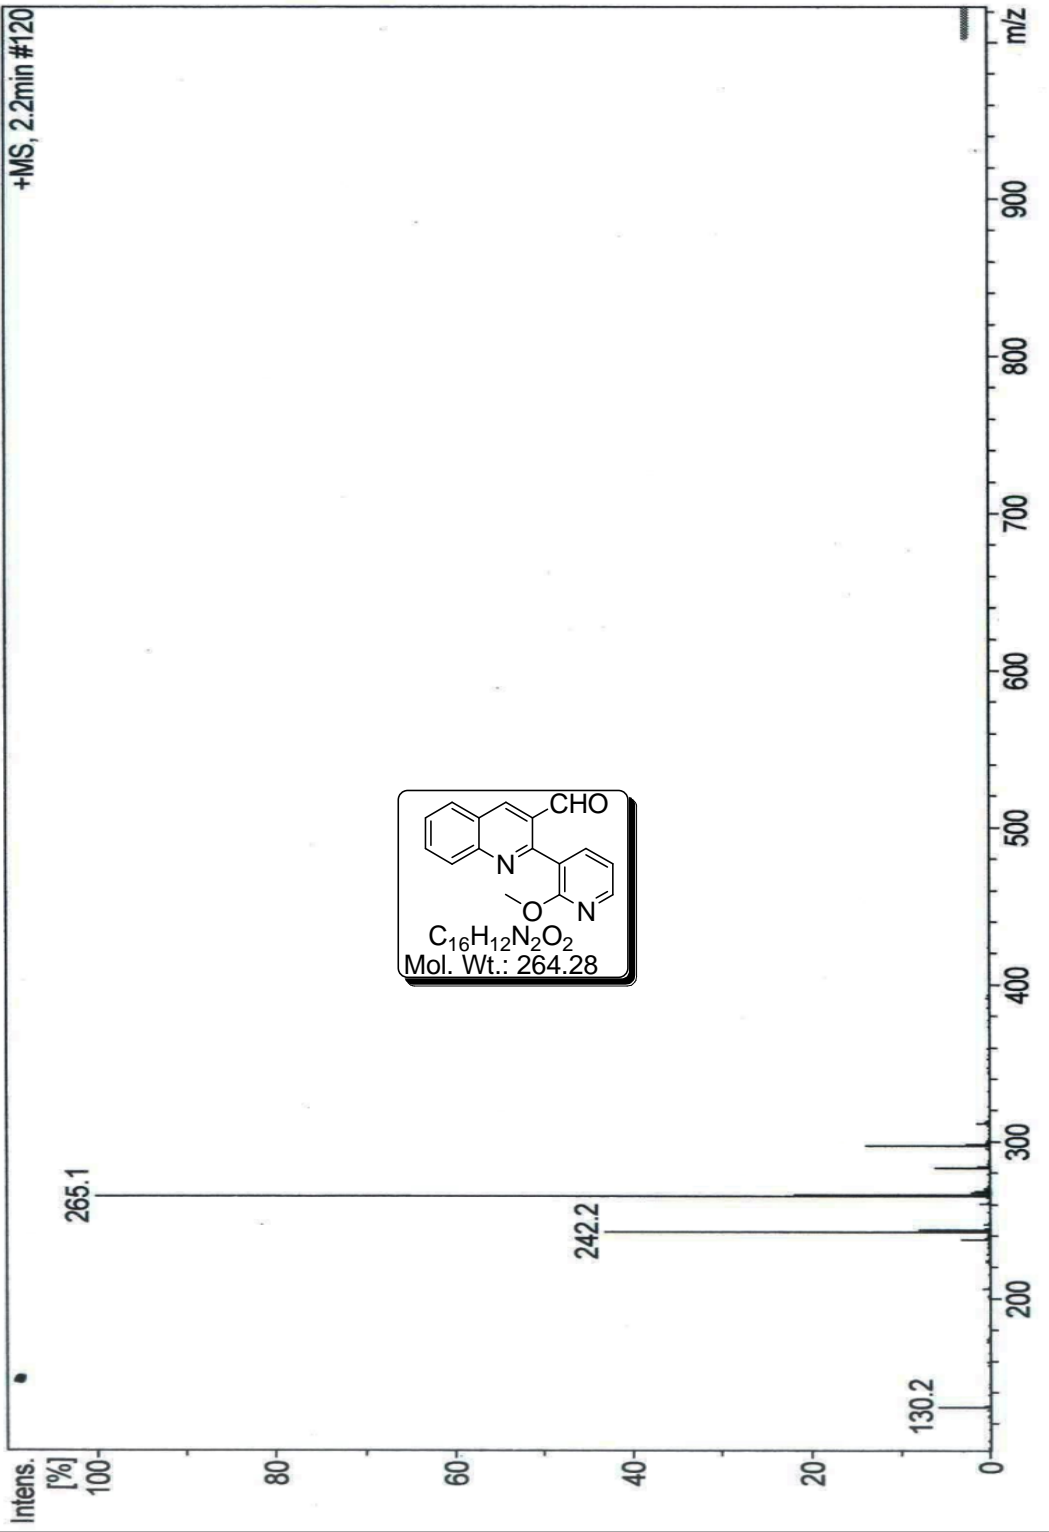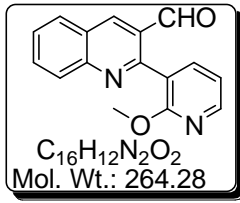

890.0 —

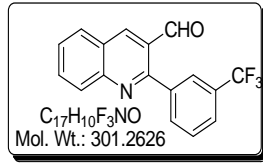

8.928  
8.307  
8.072  
8.026  
7.943  
7.865  
7.825  
7.714  
7.261

10.171 —

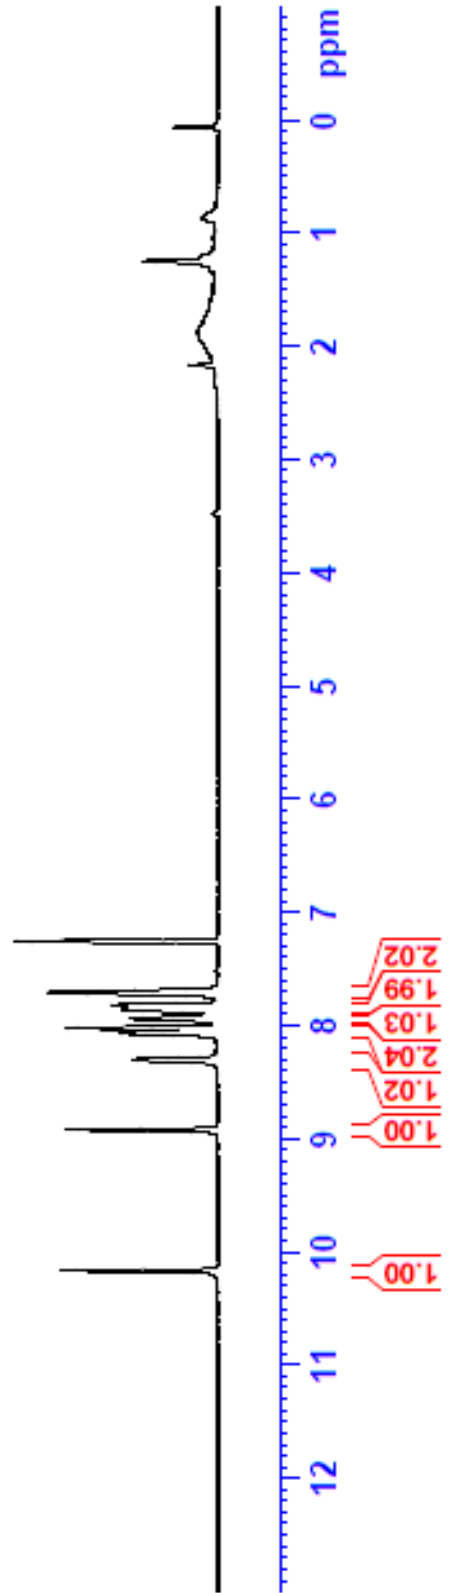

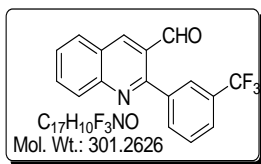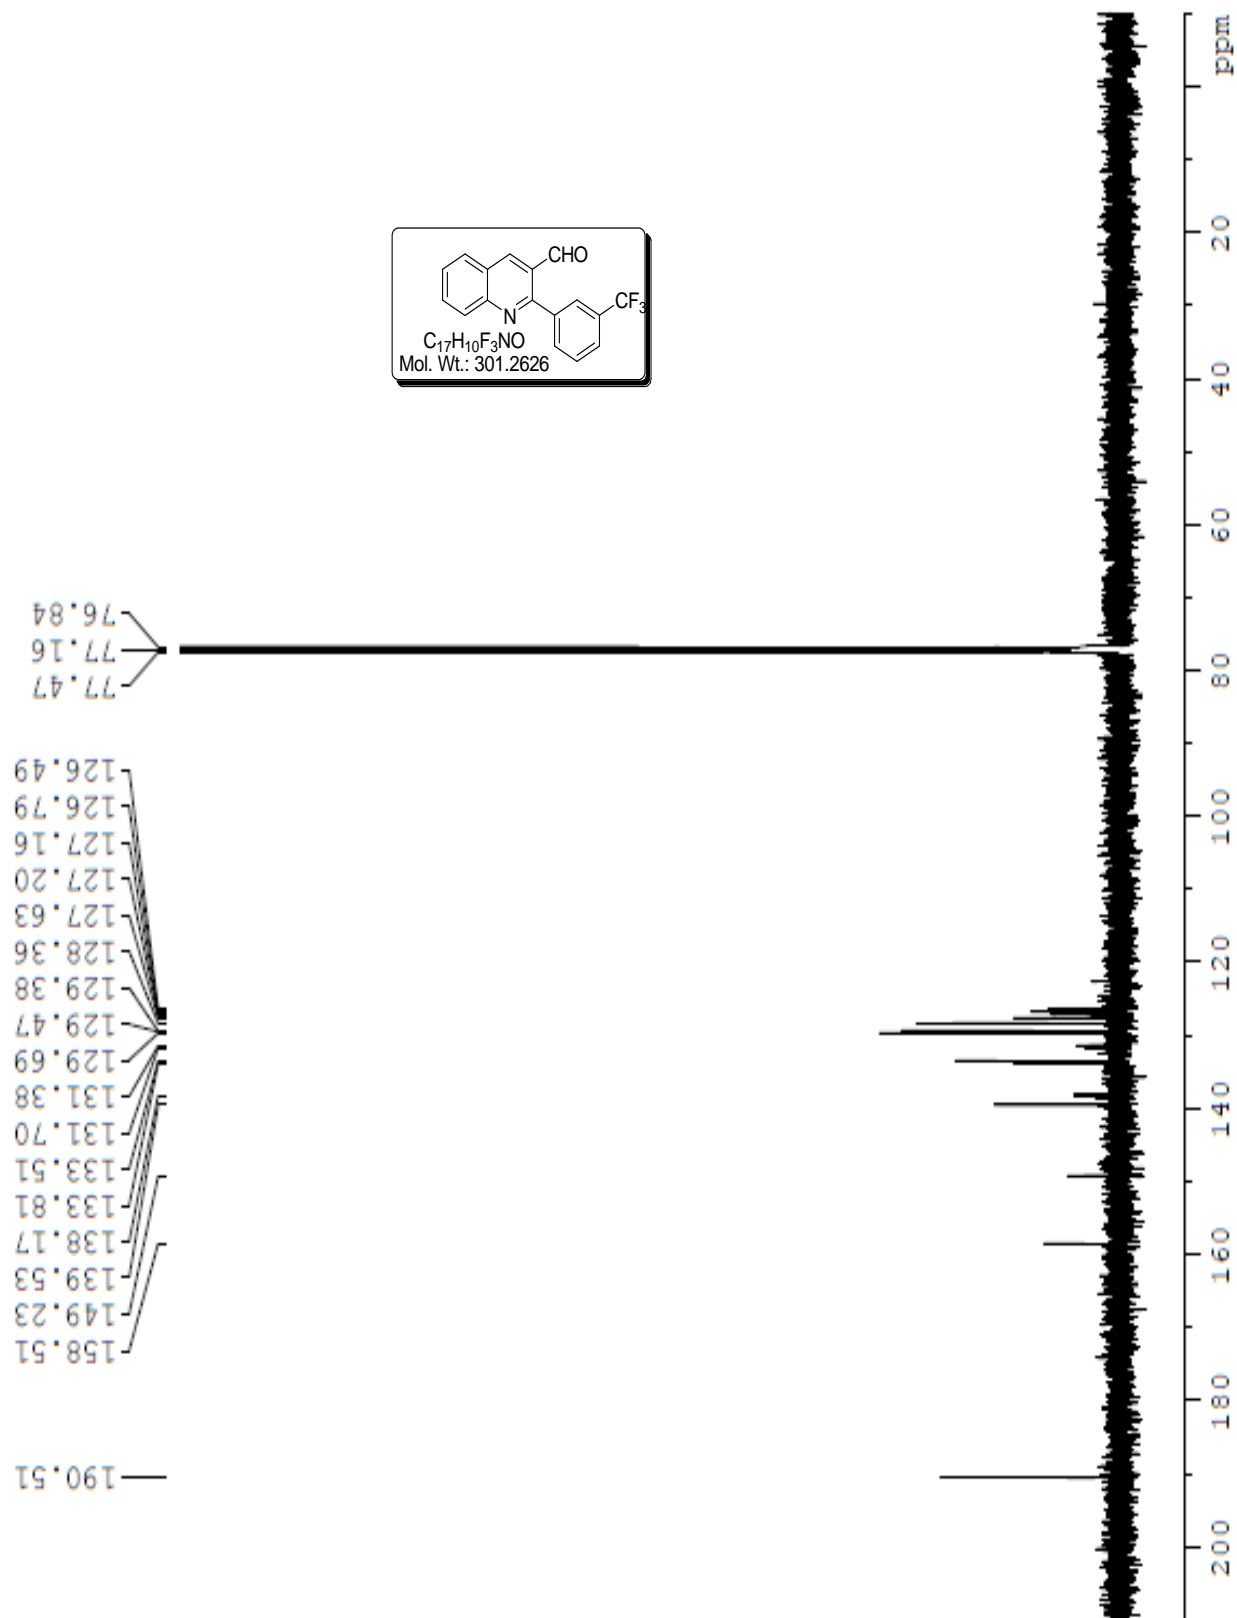

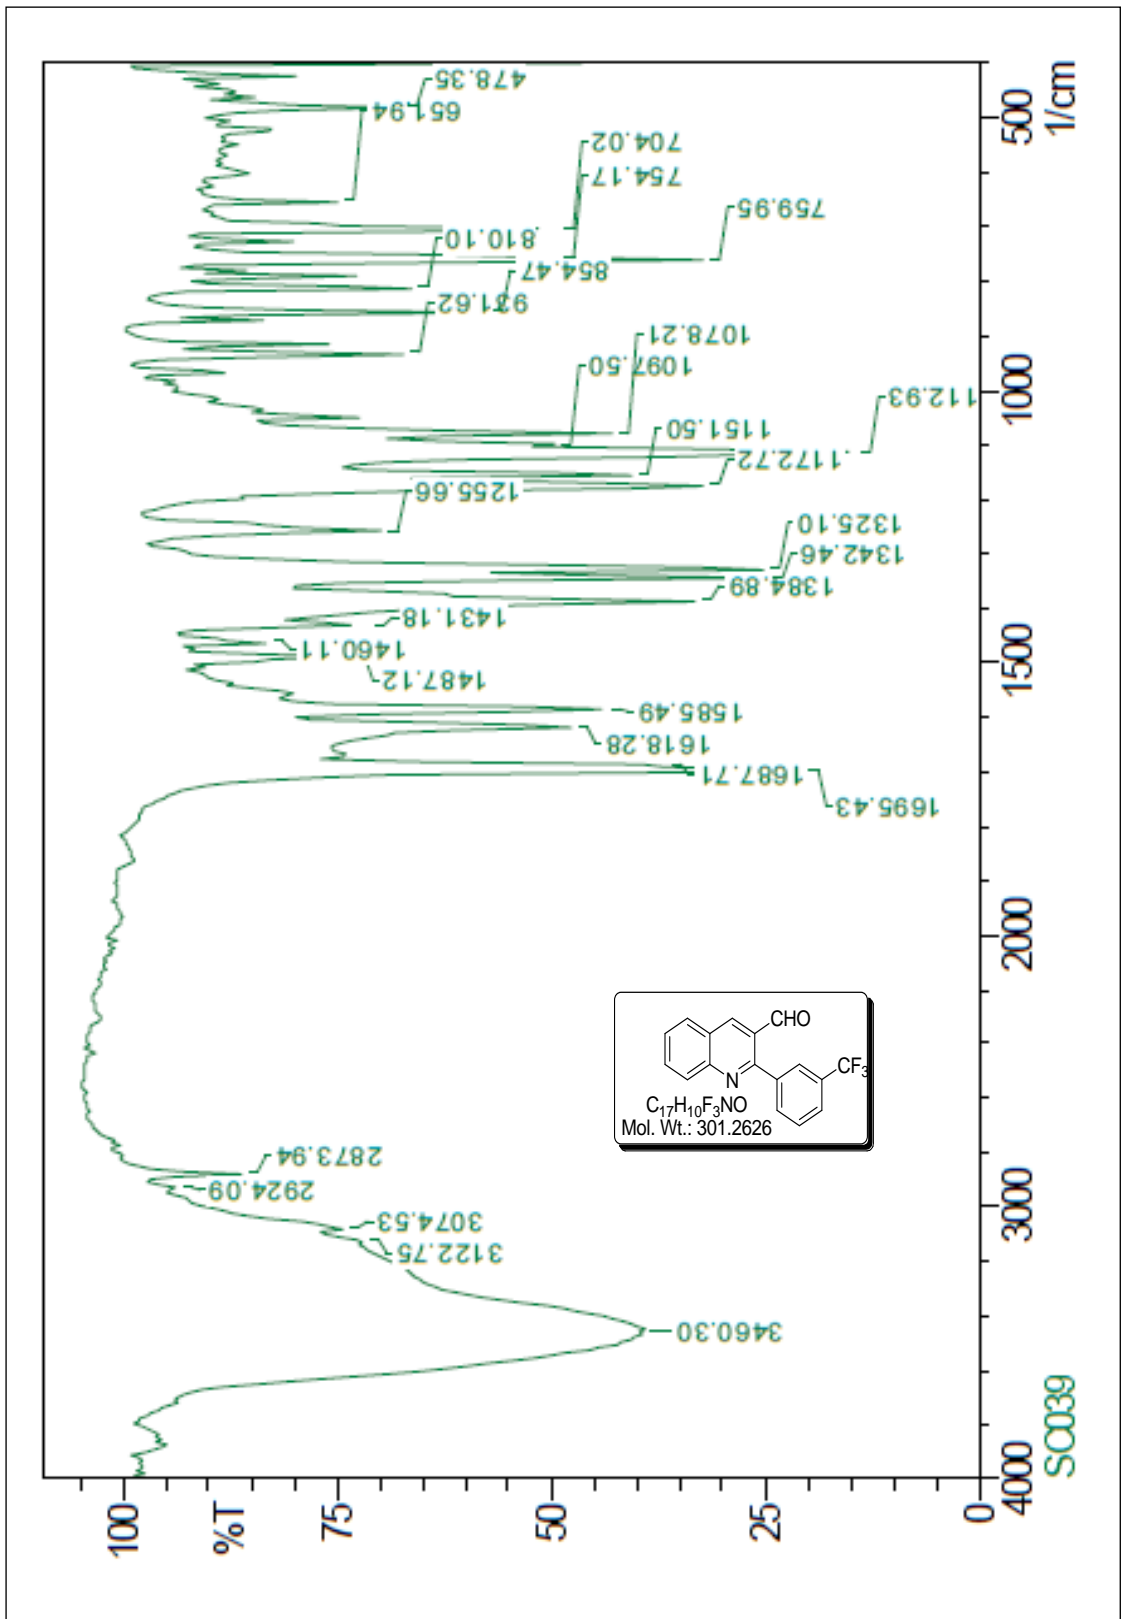

+MS, 3.3min #178

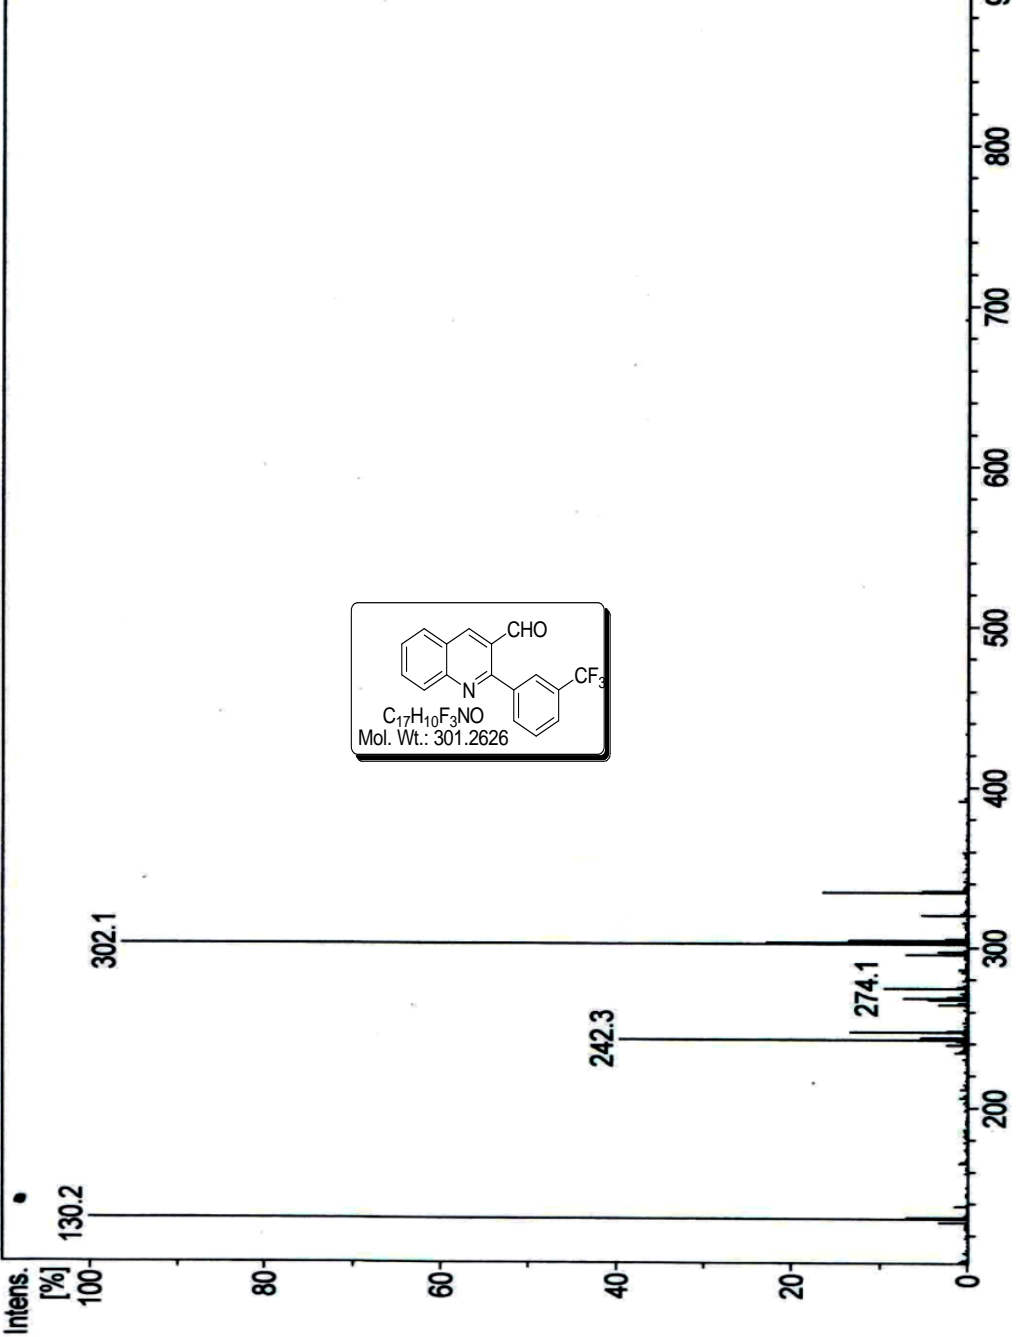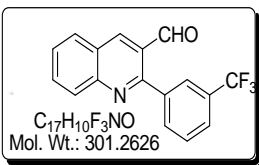



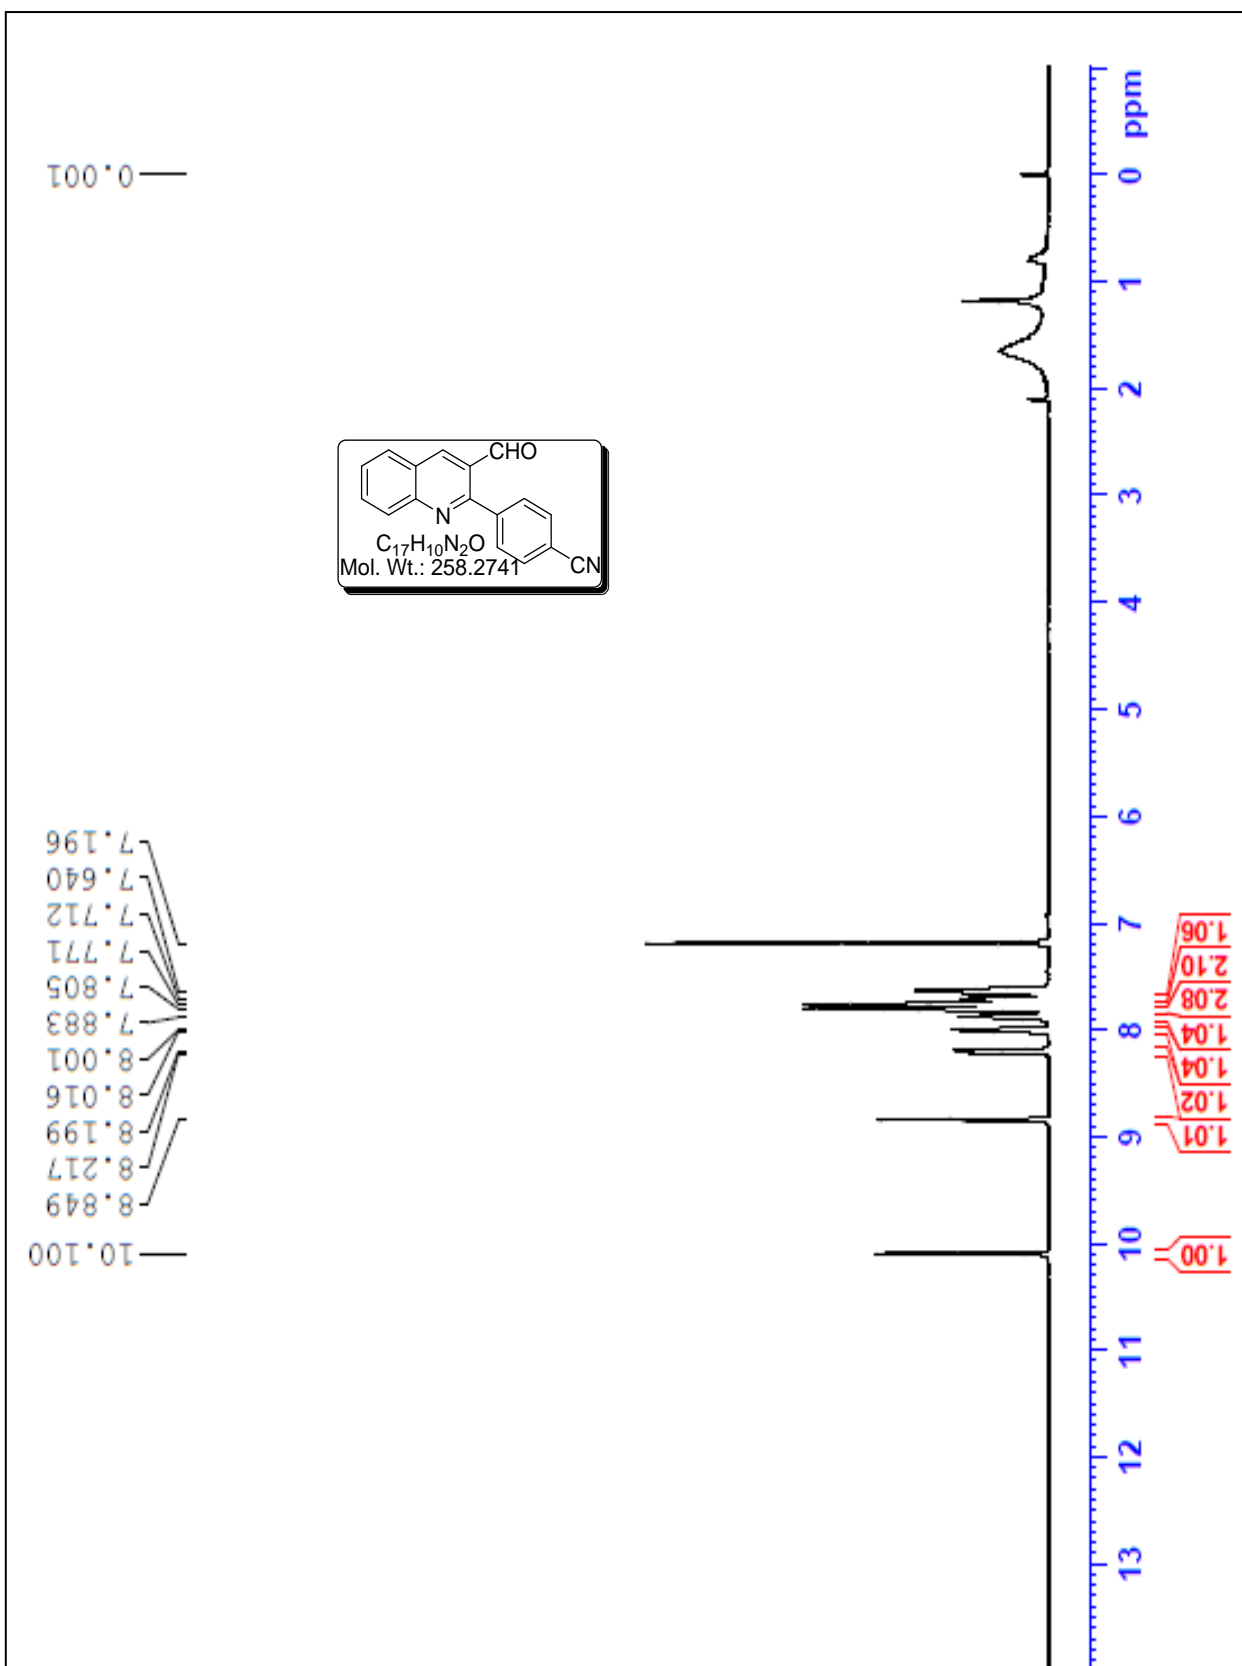

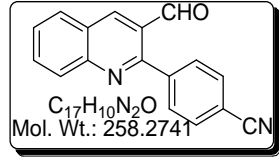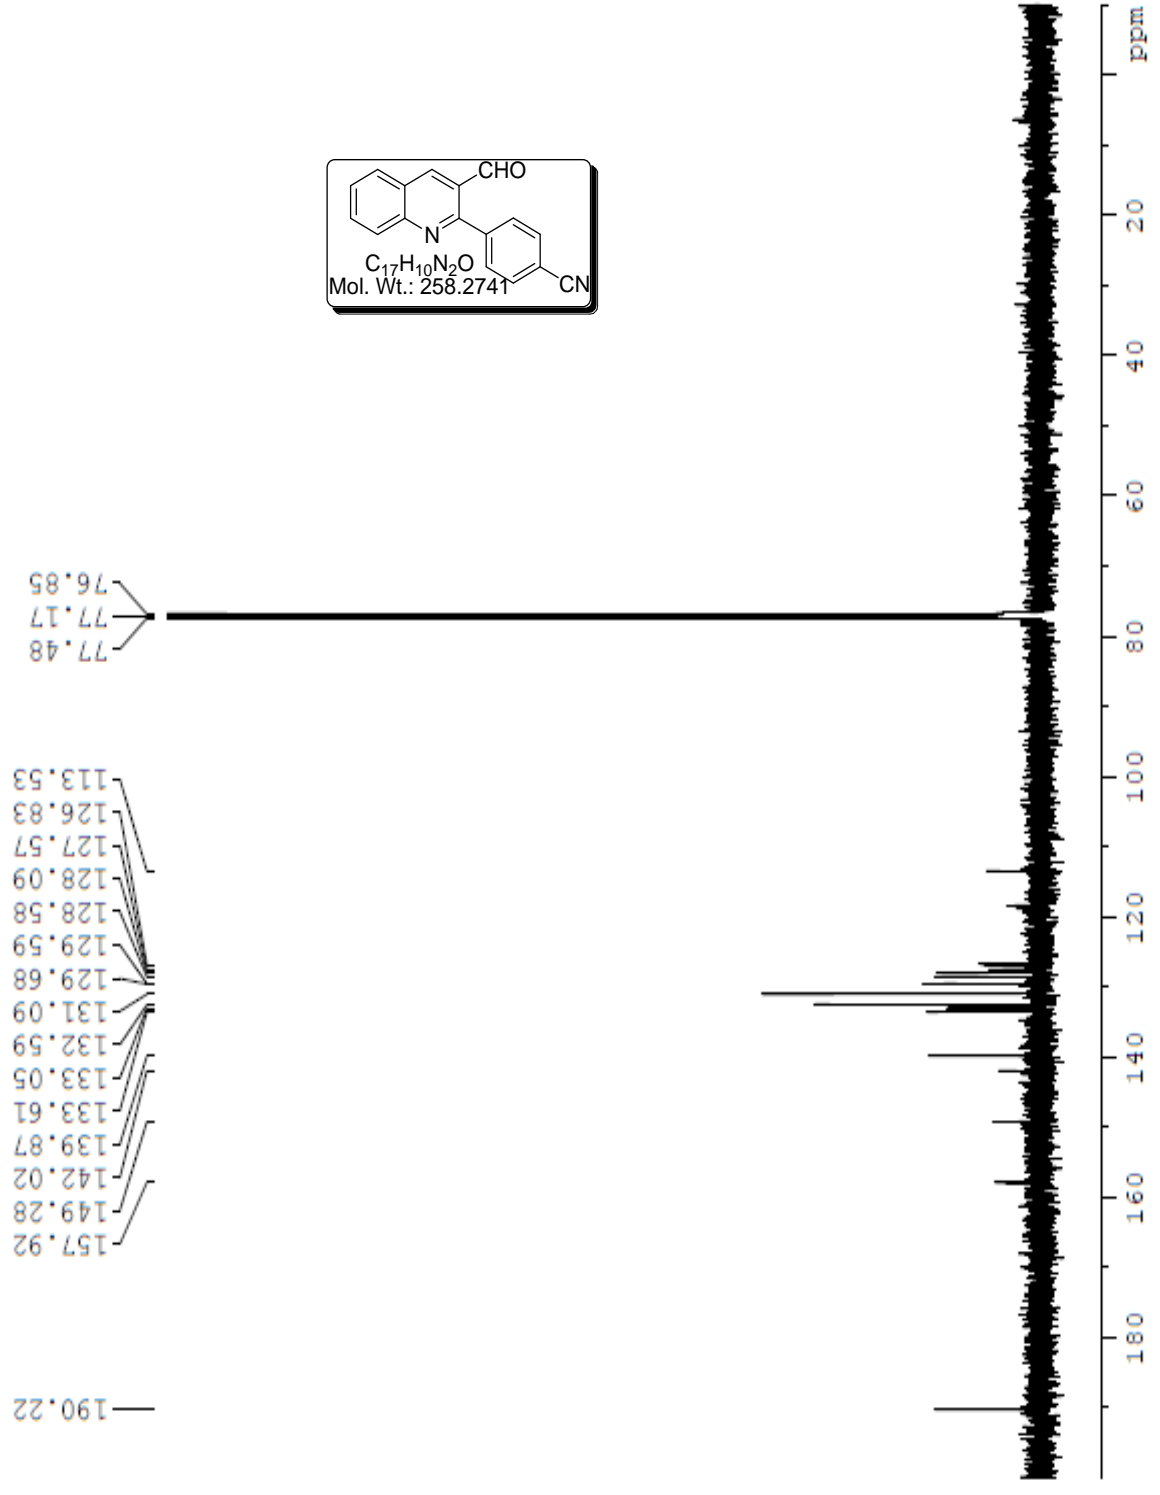

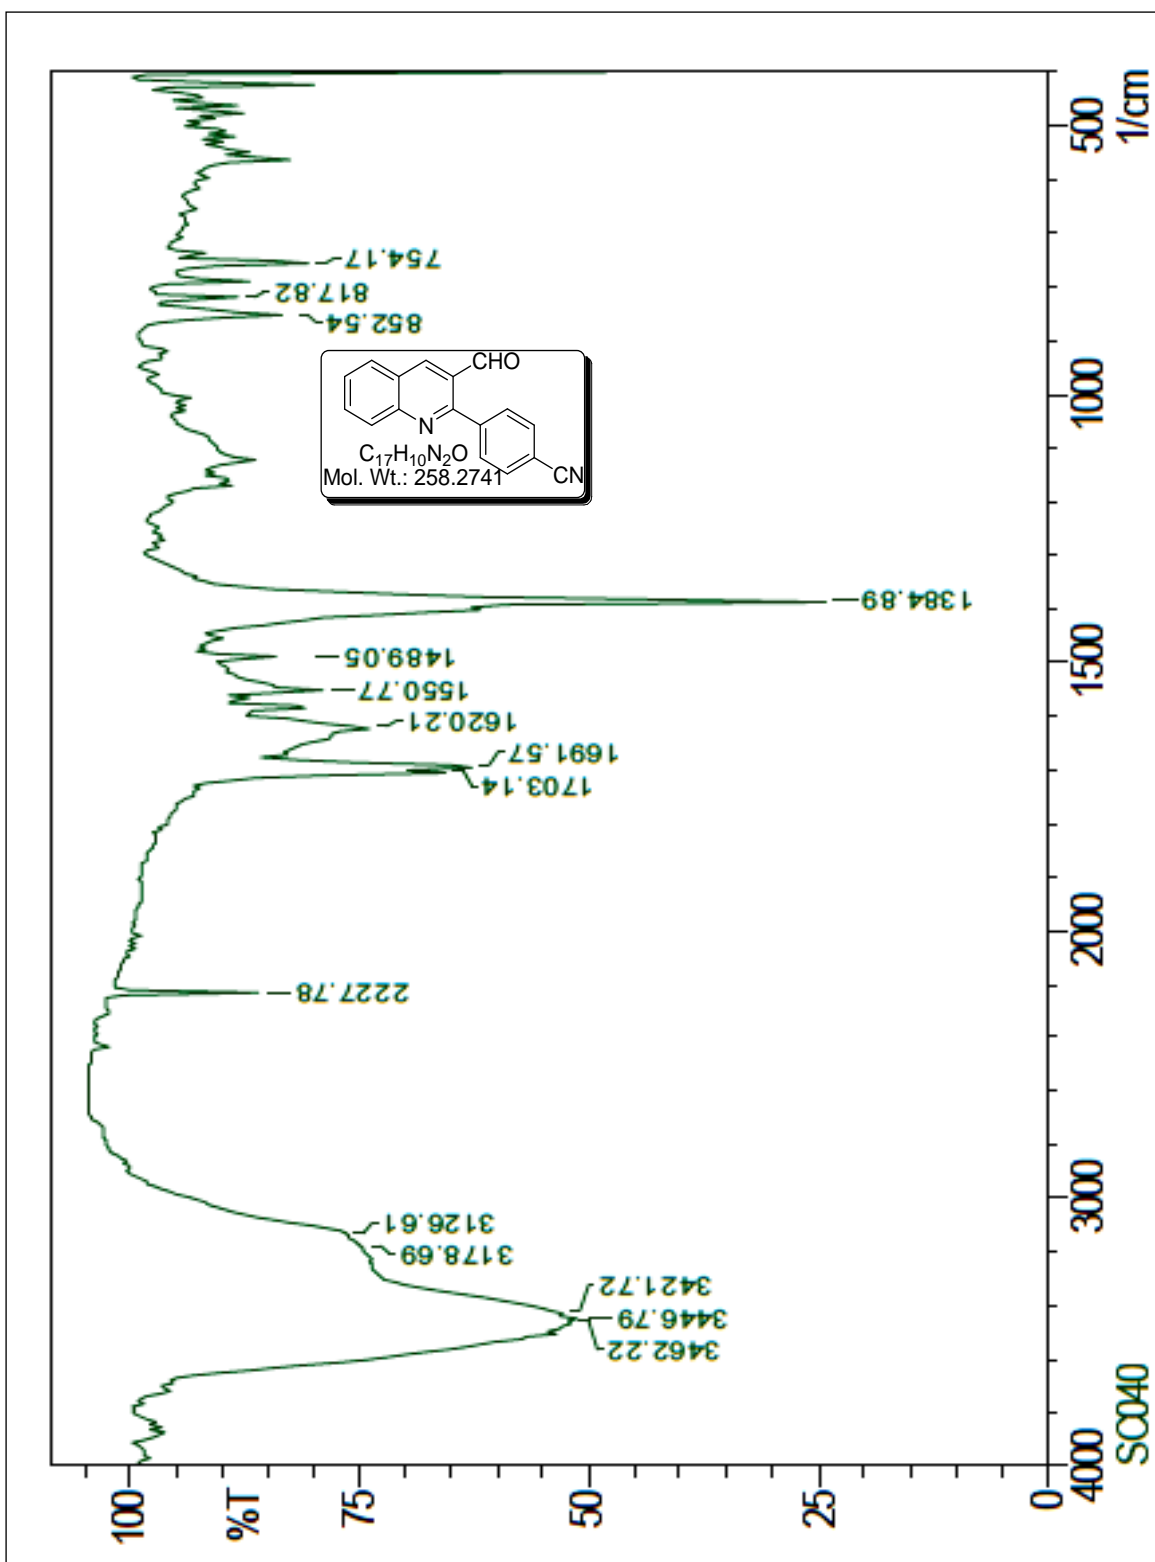

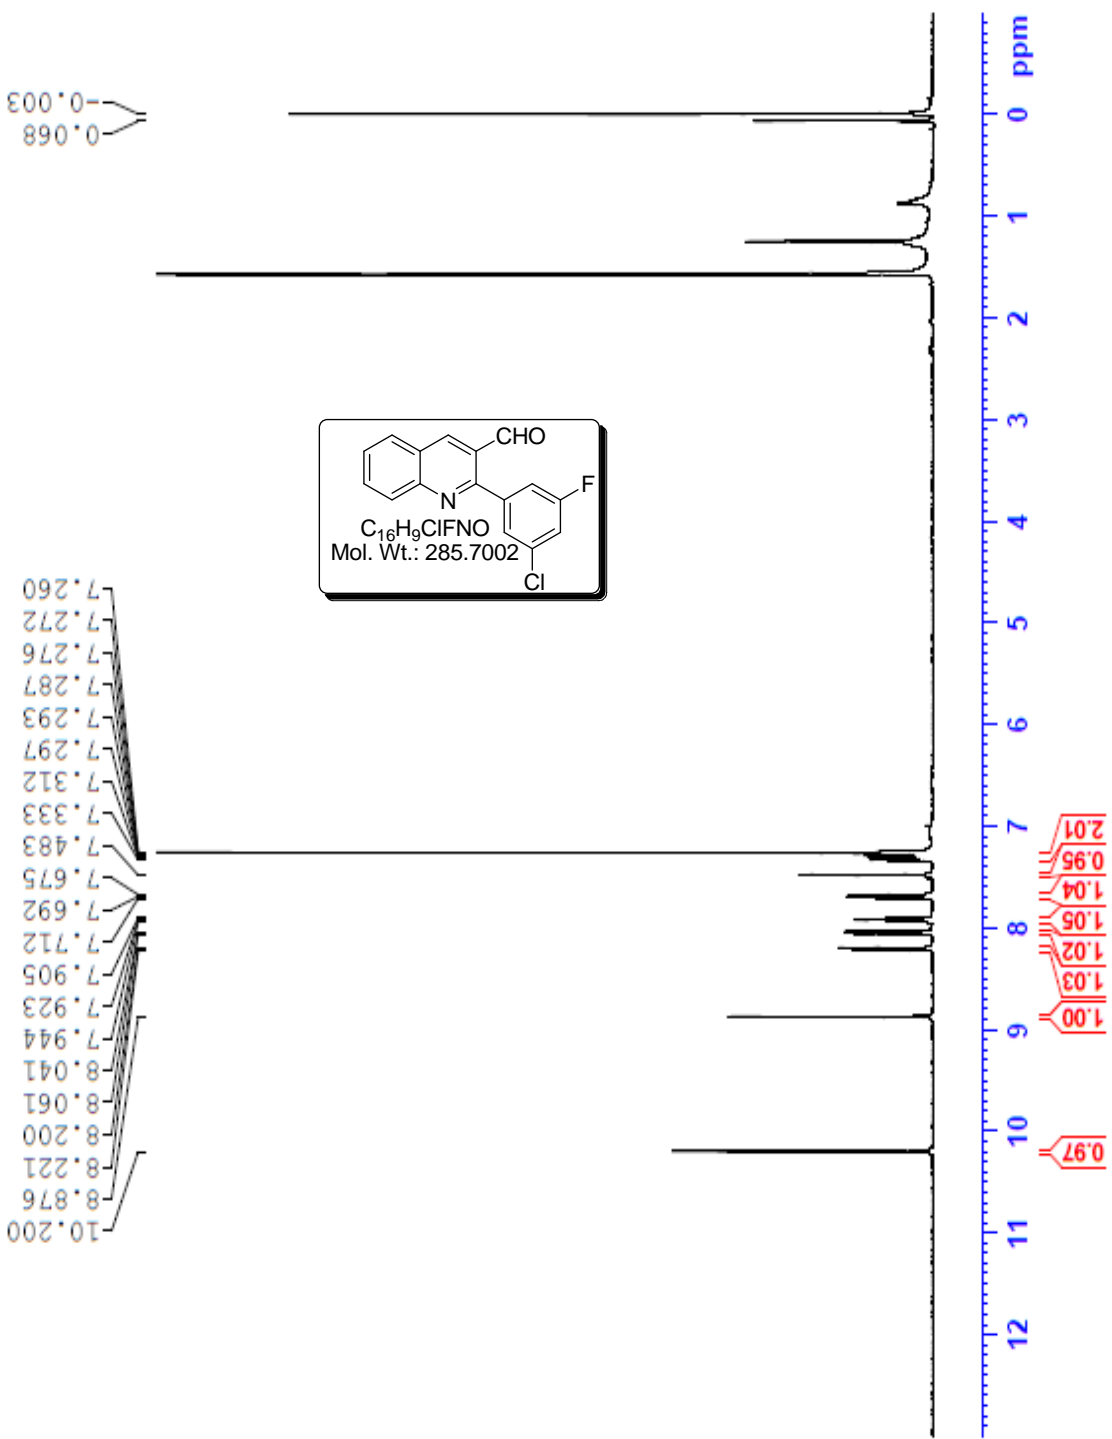

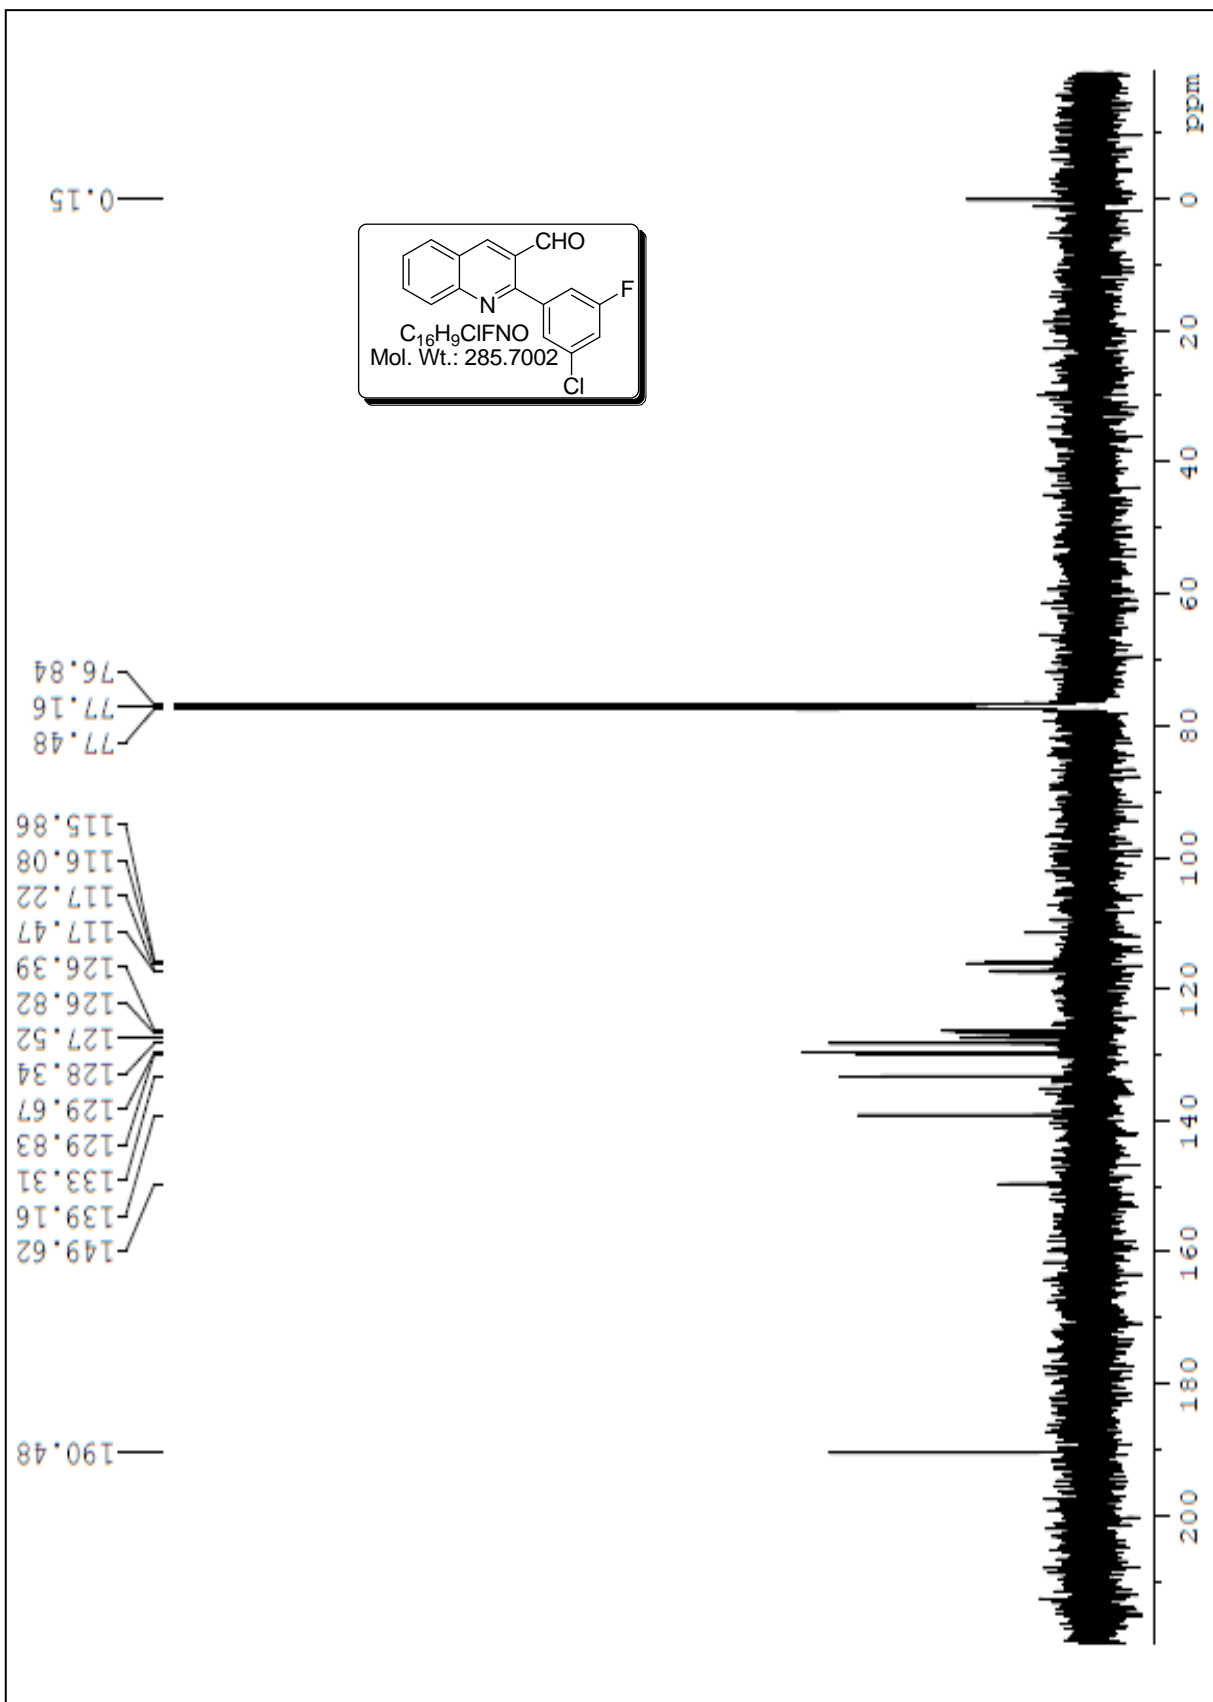

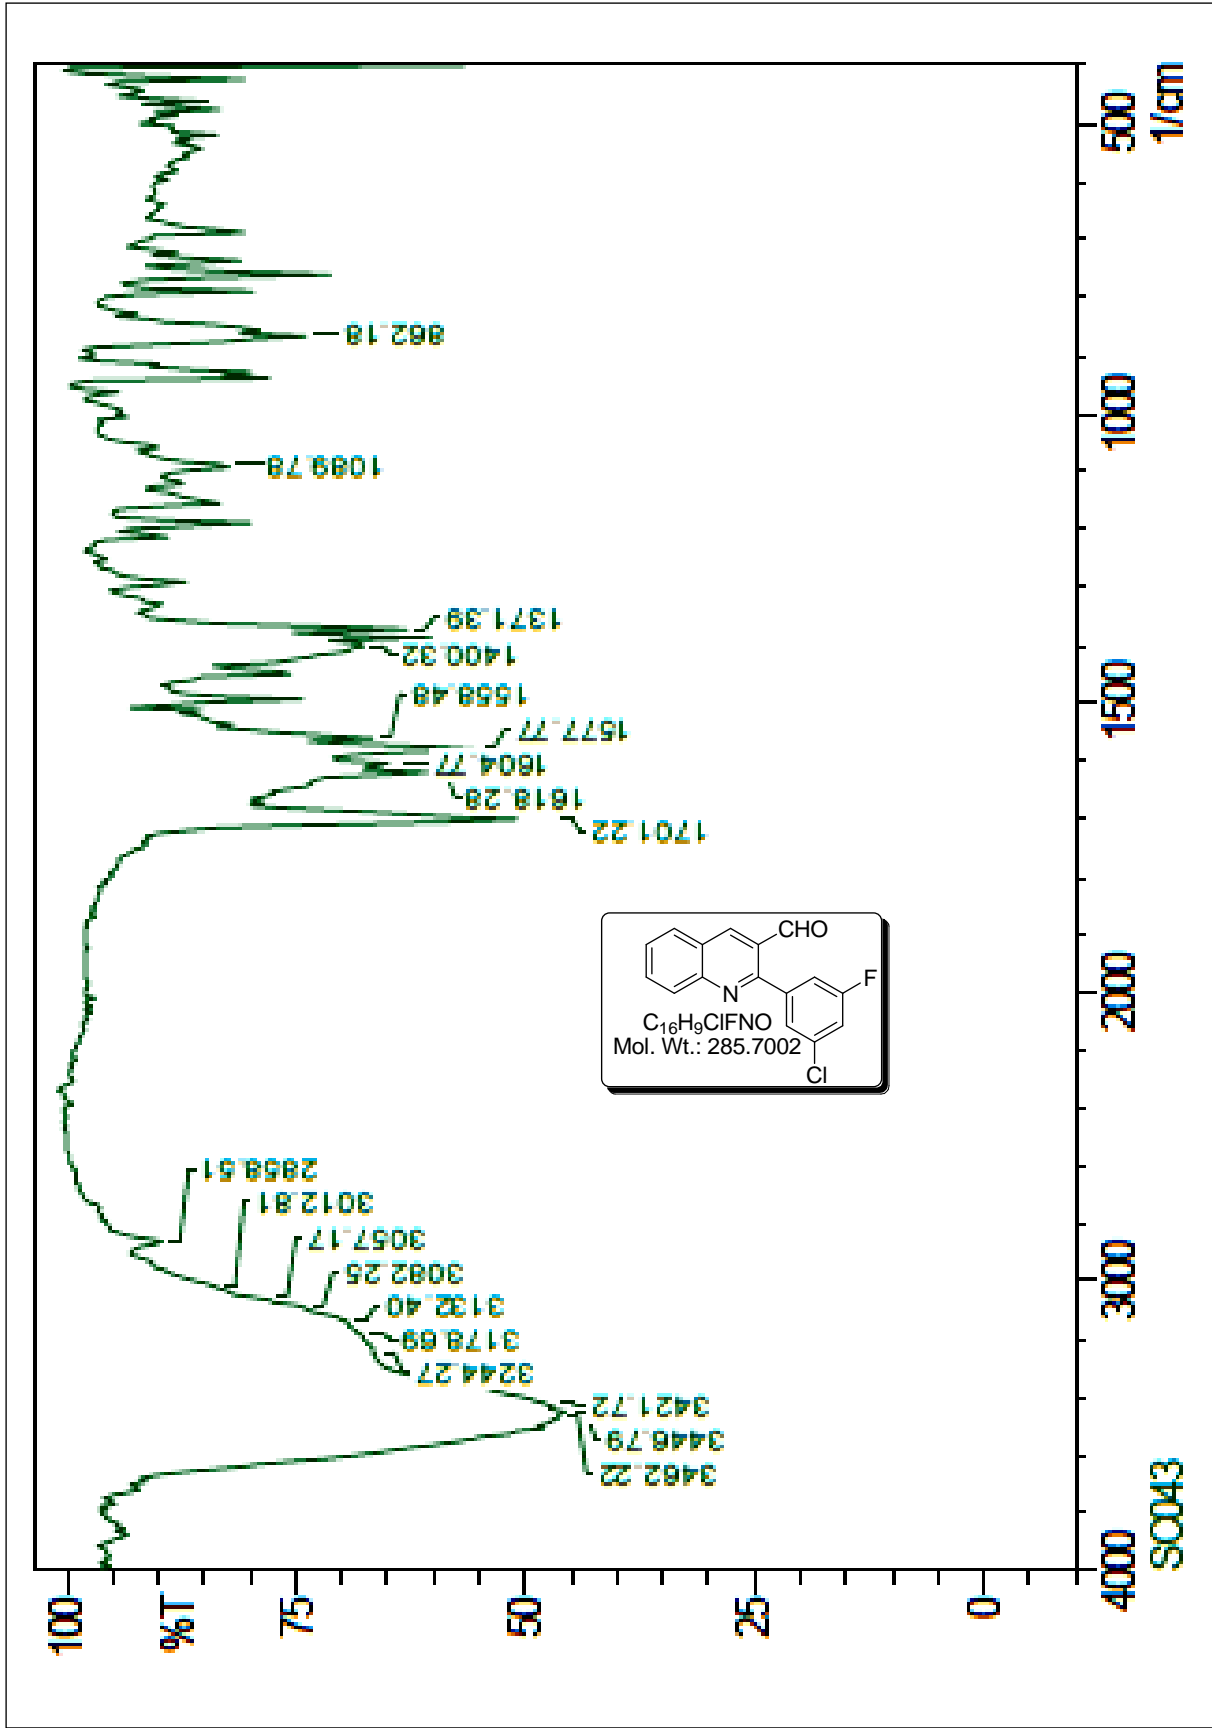

+MS, 3.3min #182

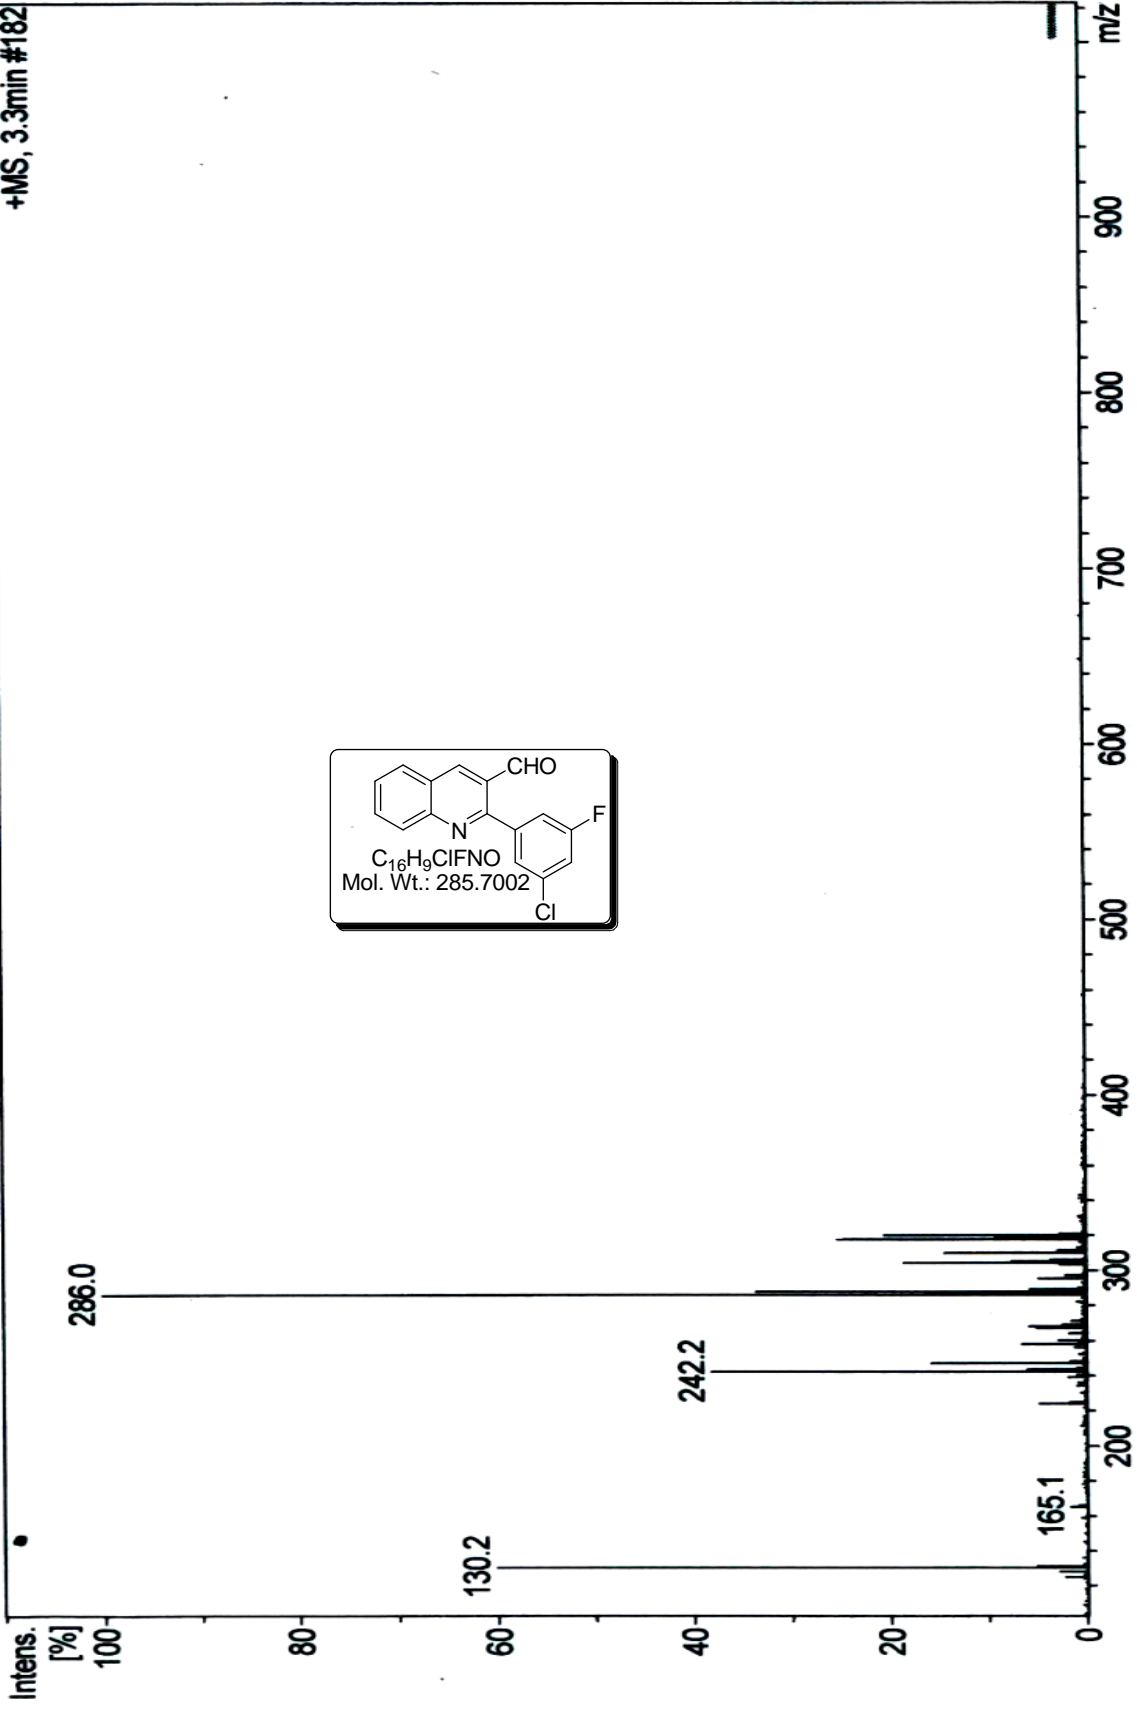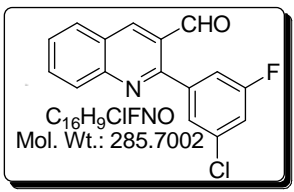

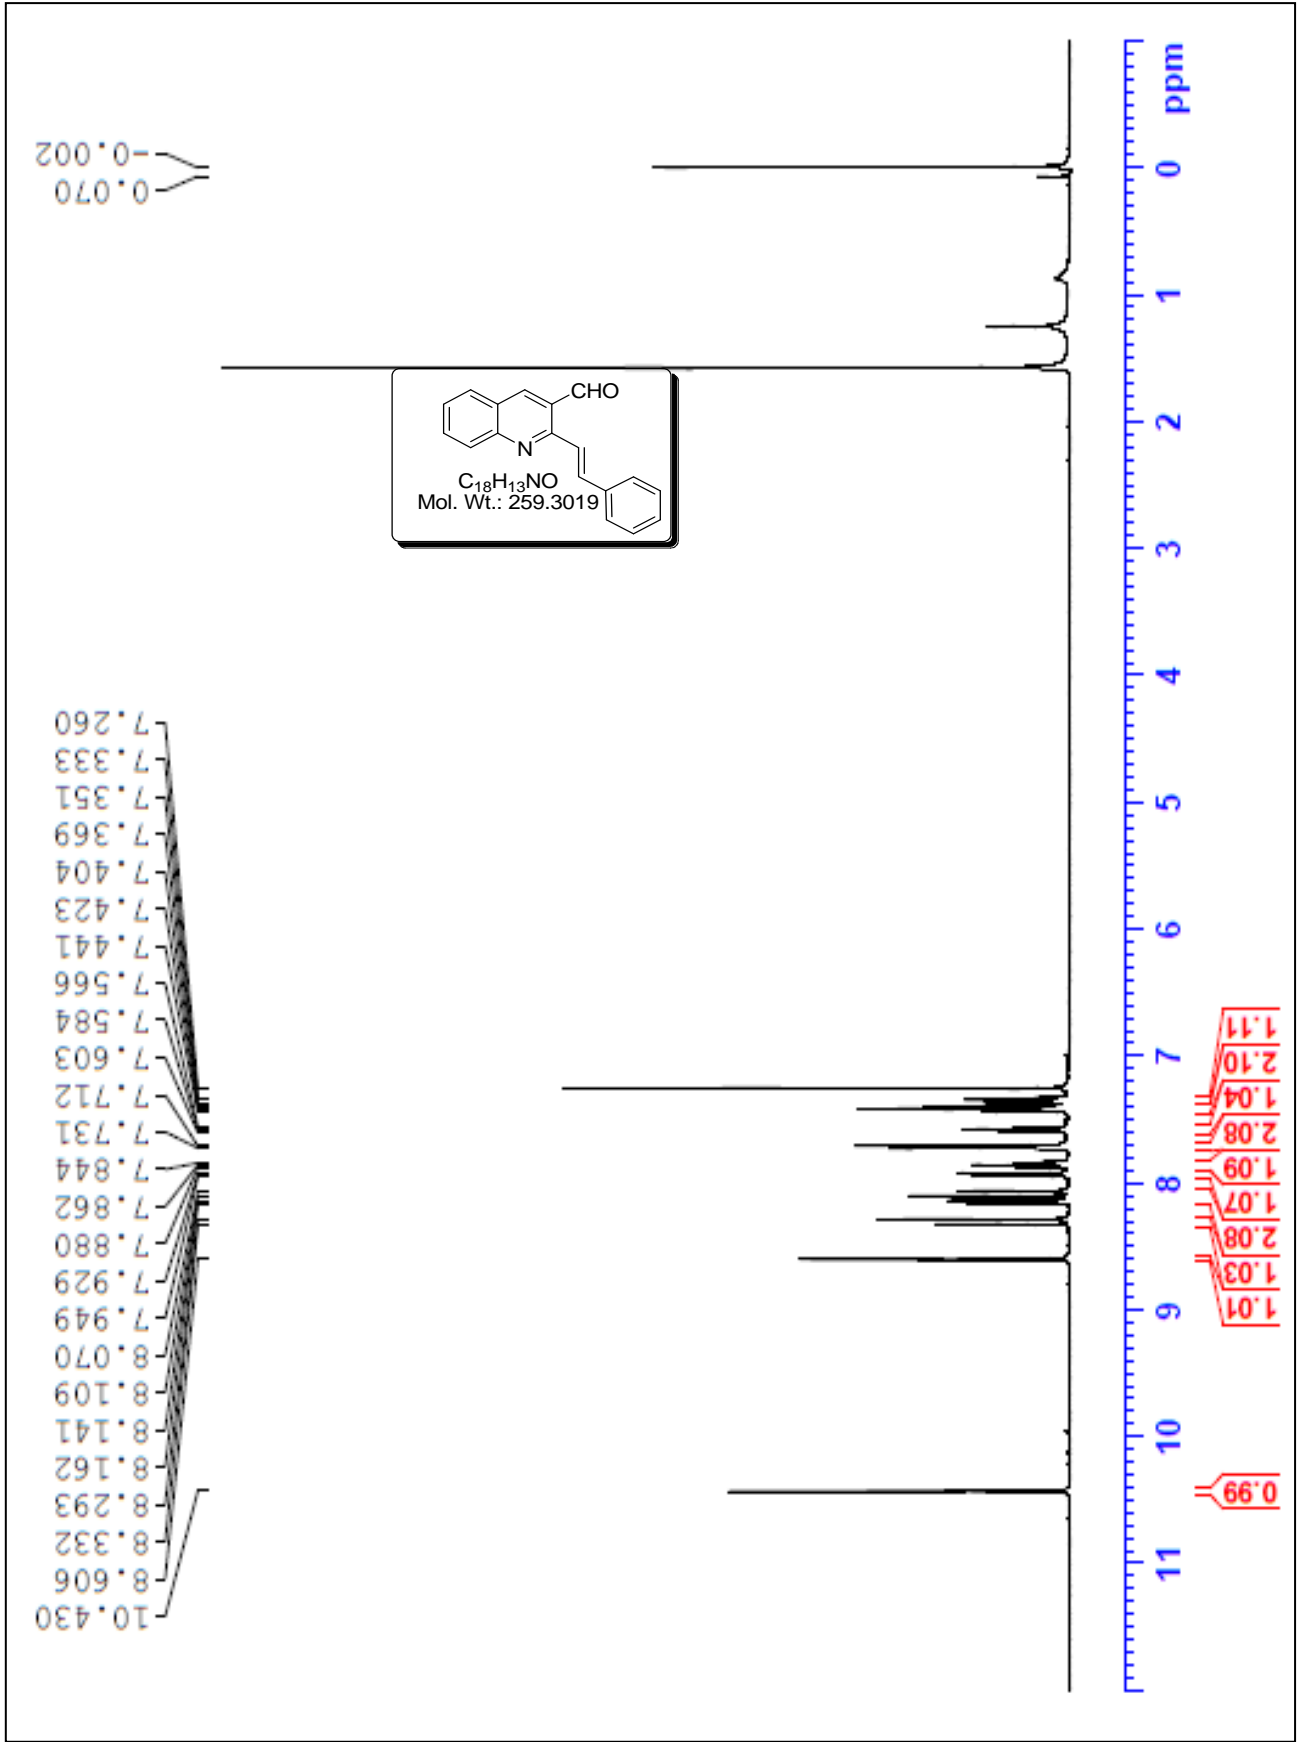



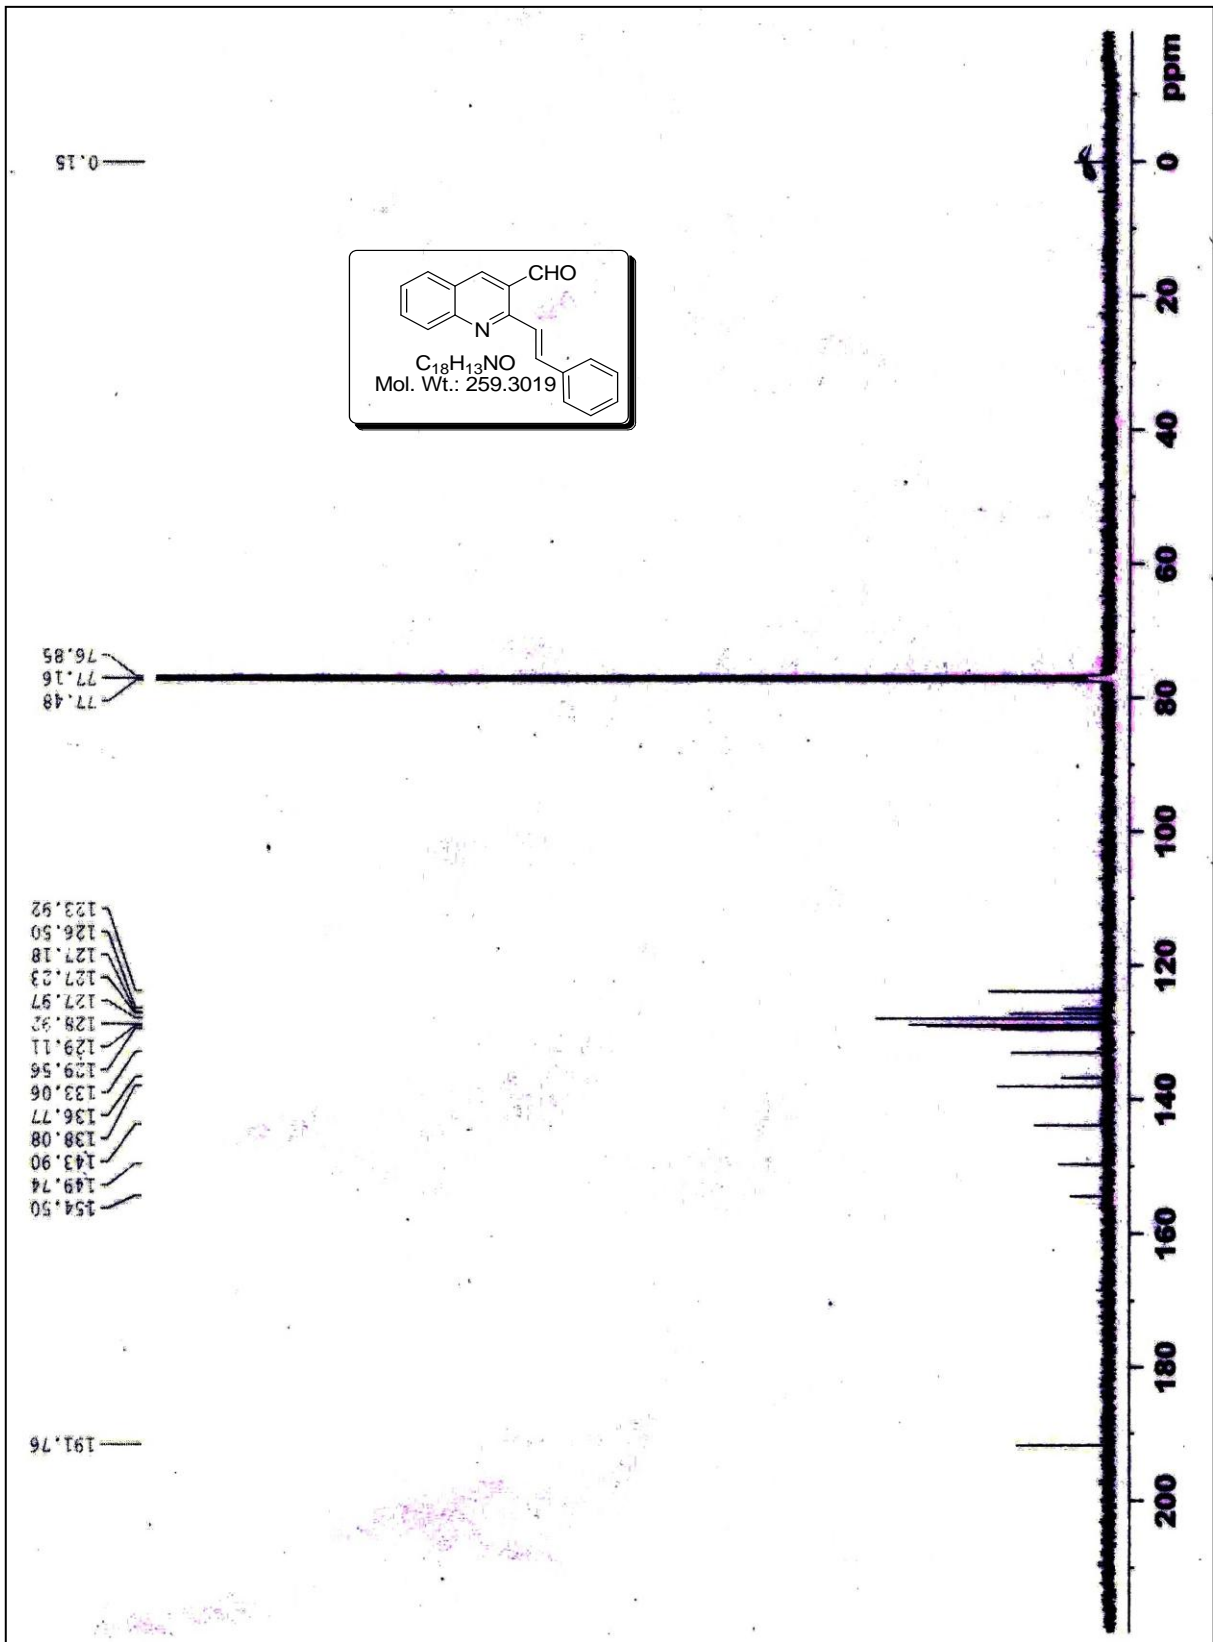

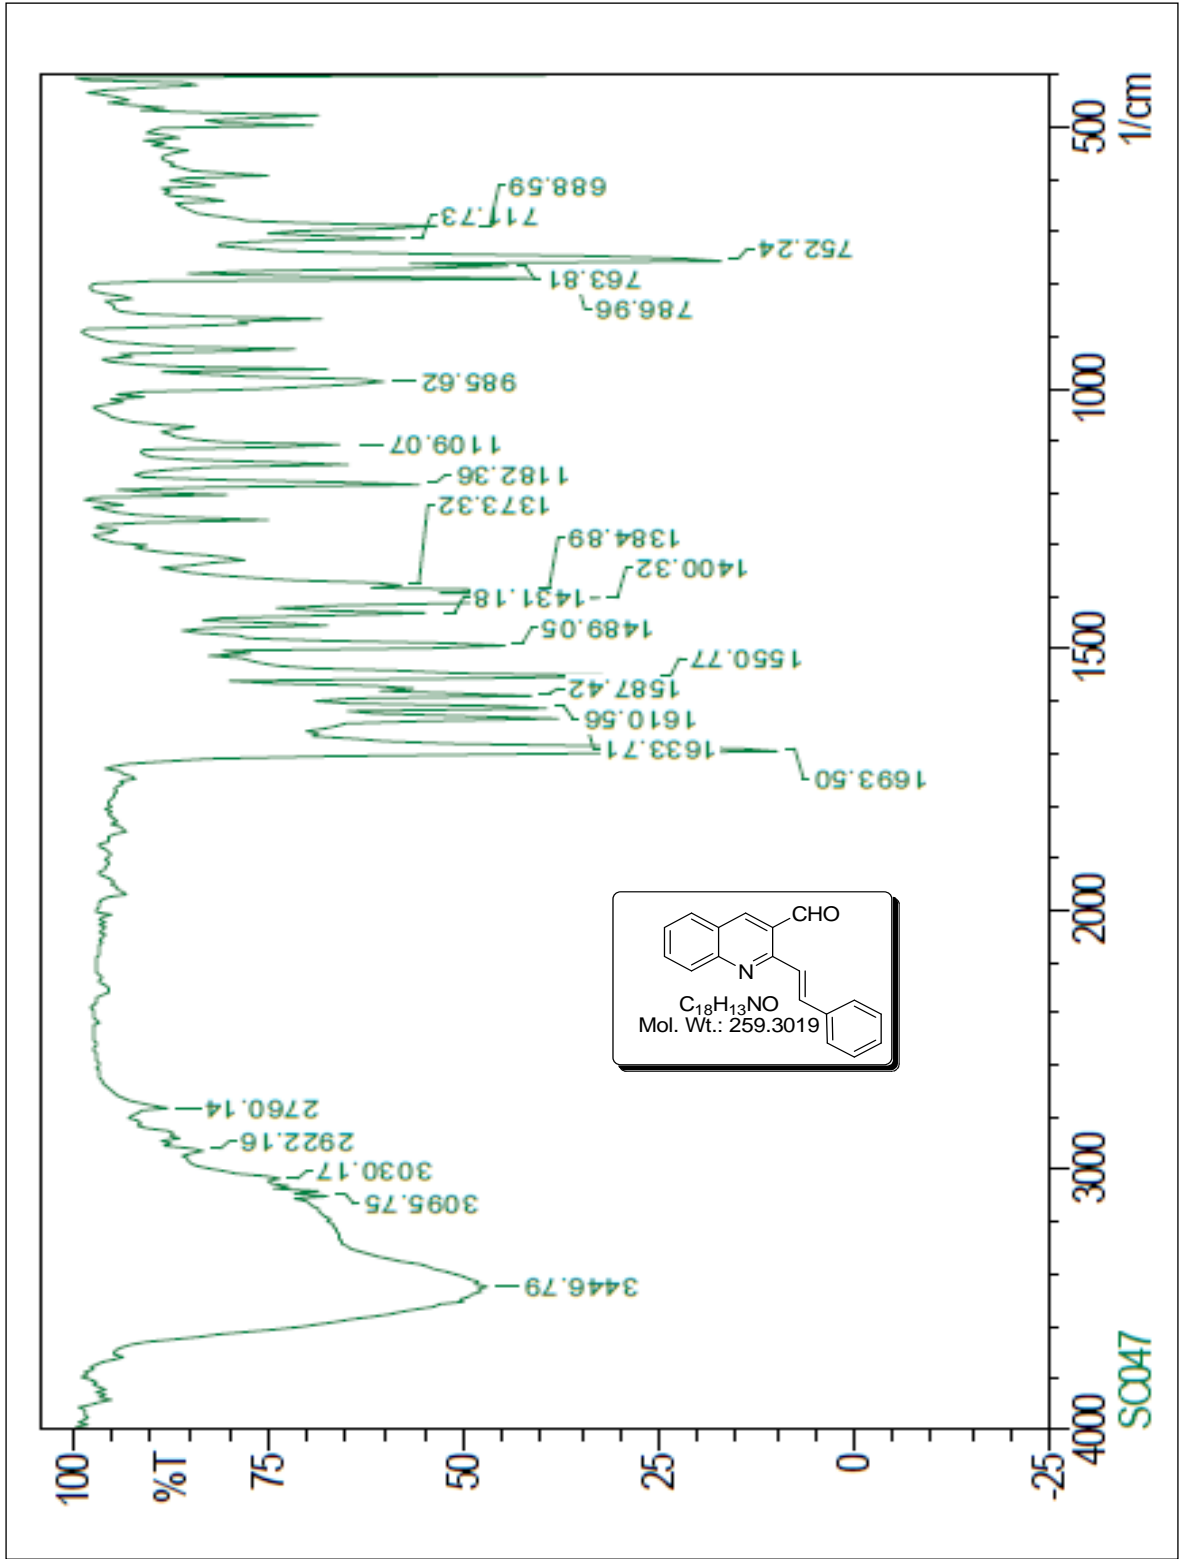

+MS, 3.4min #183

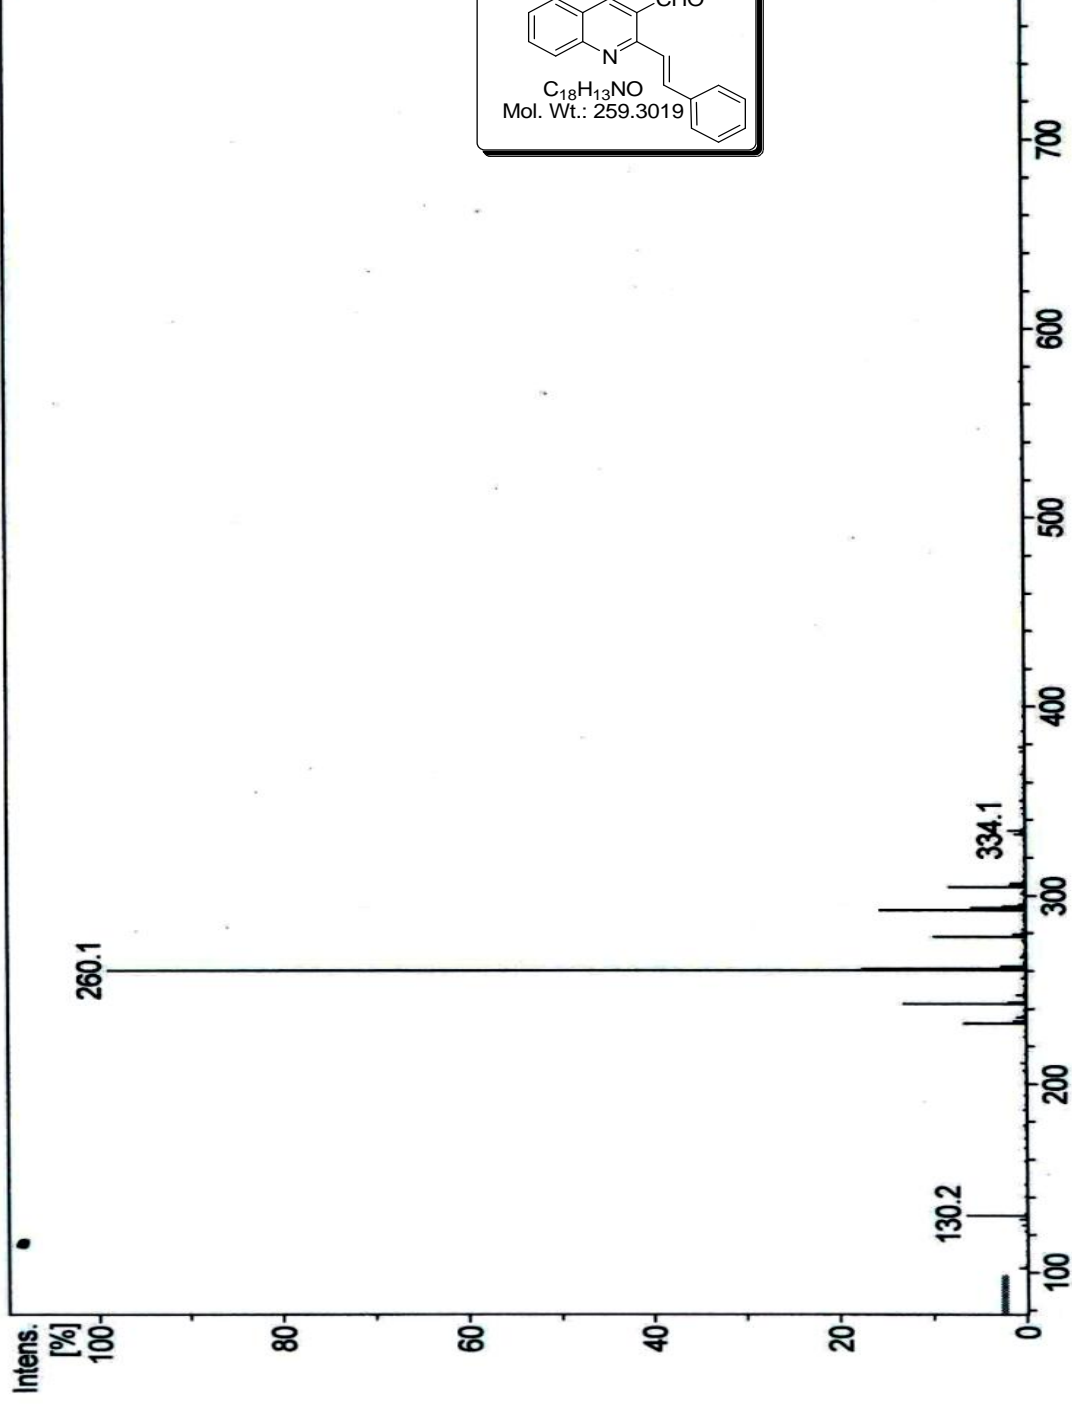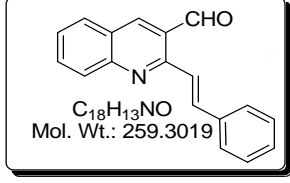

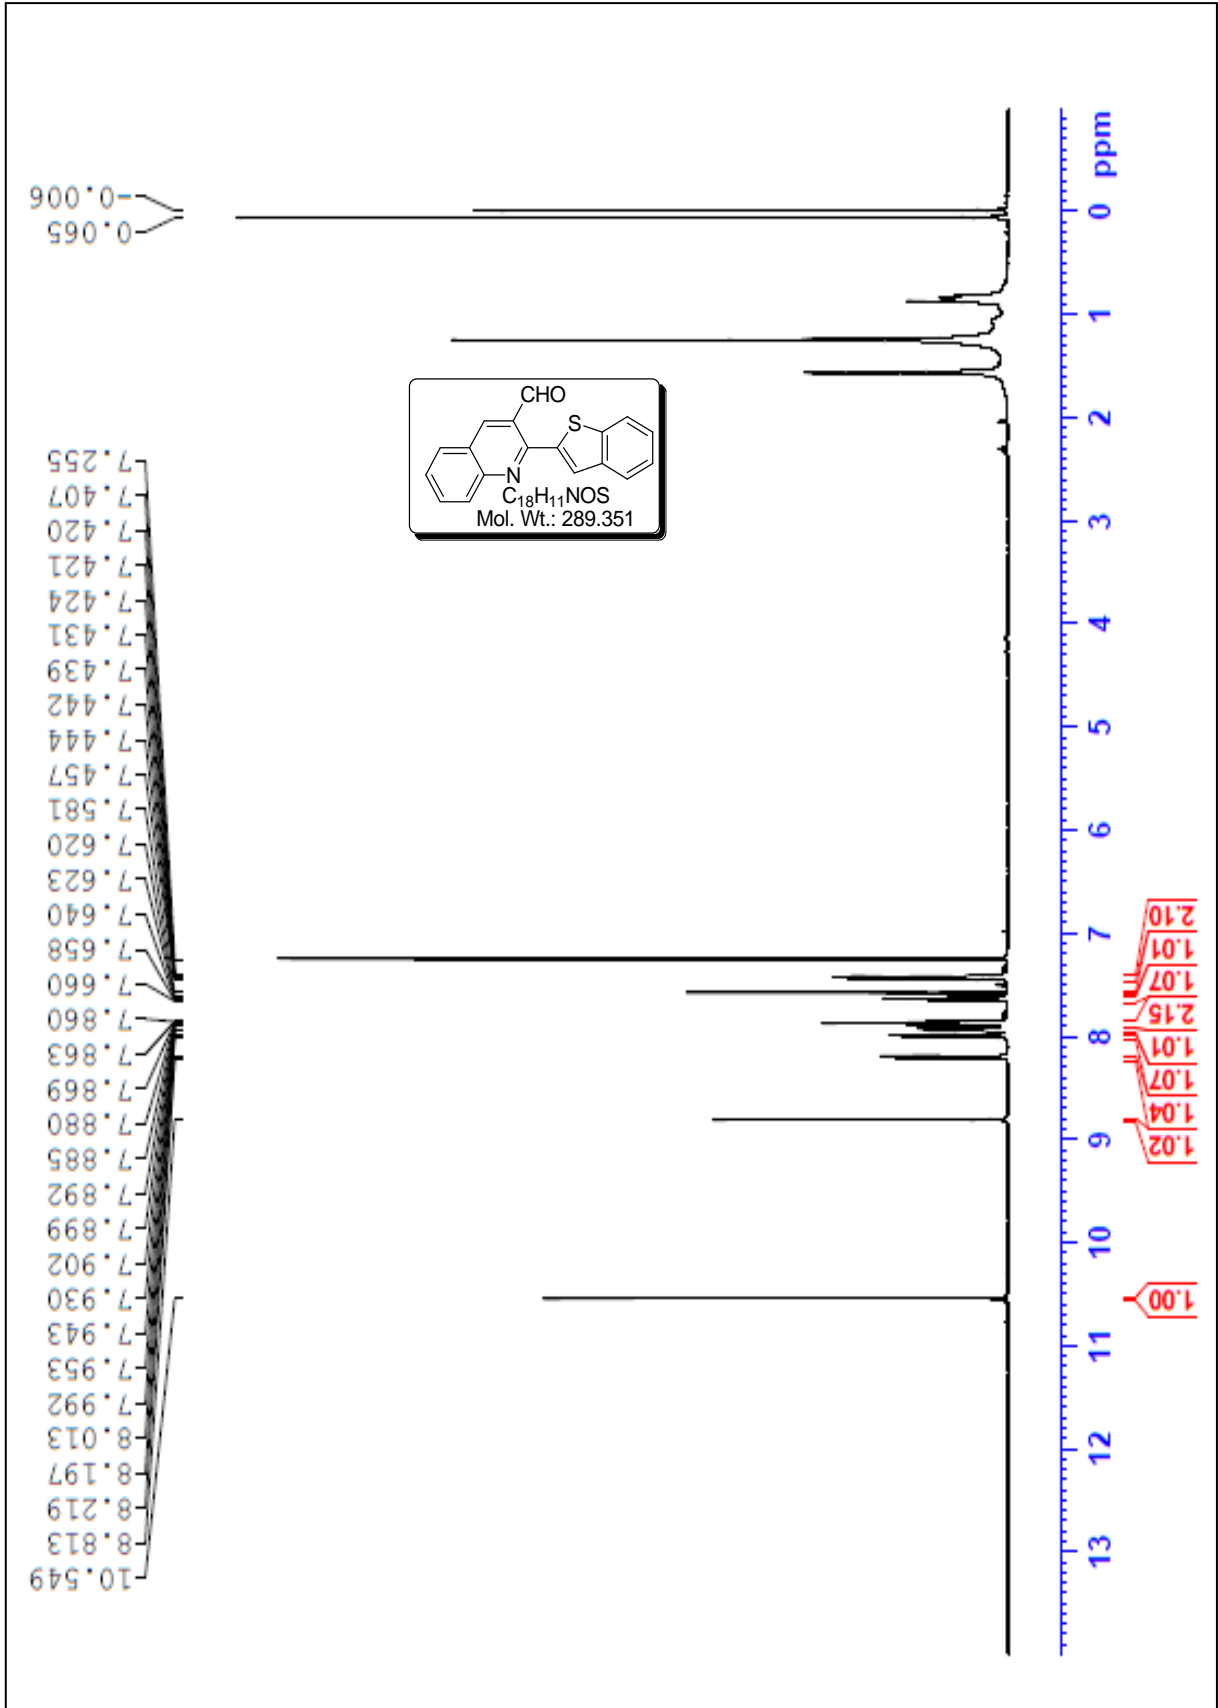

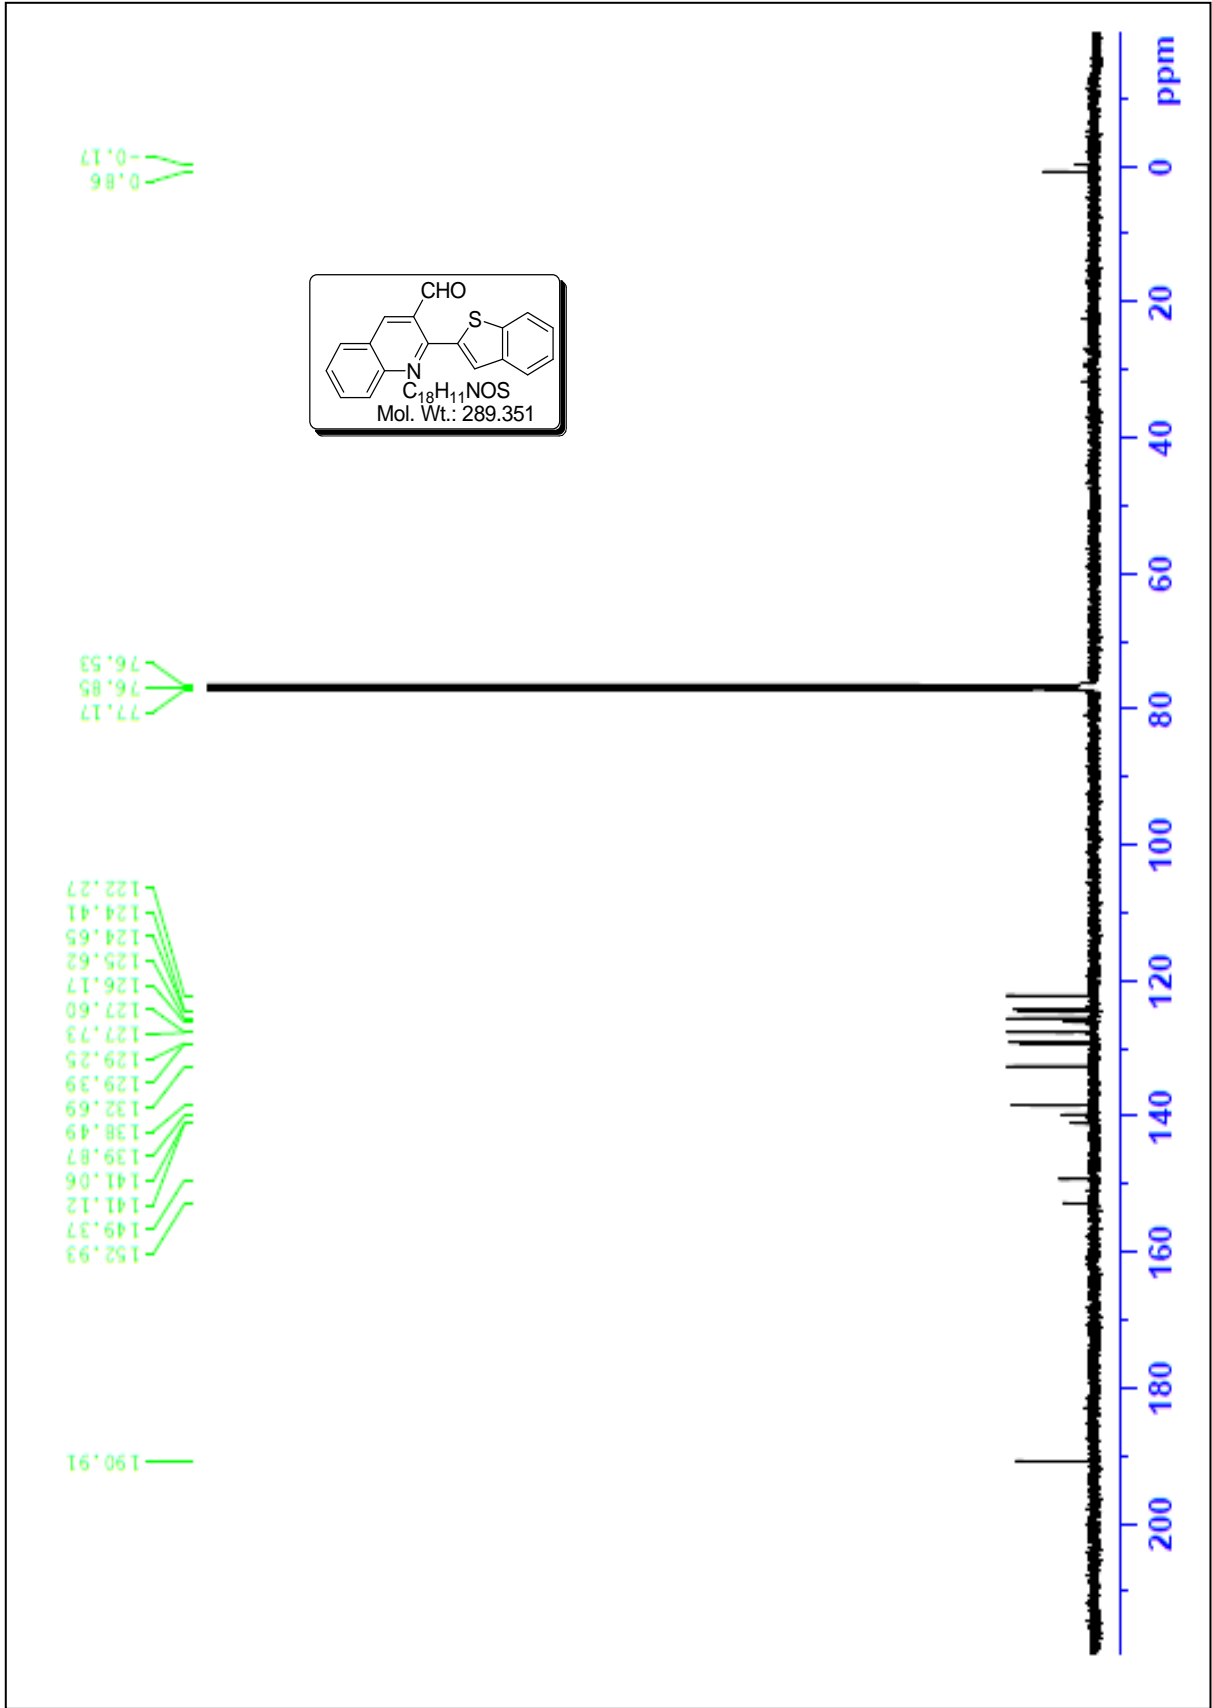

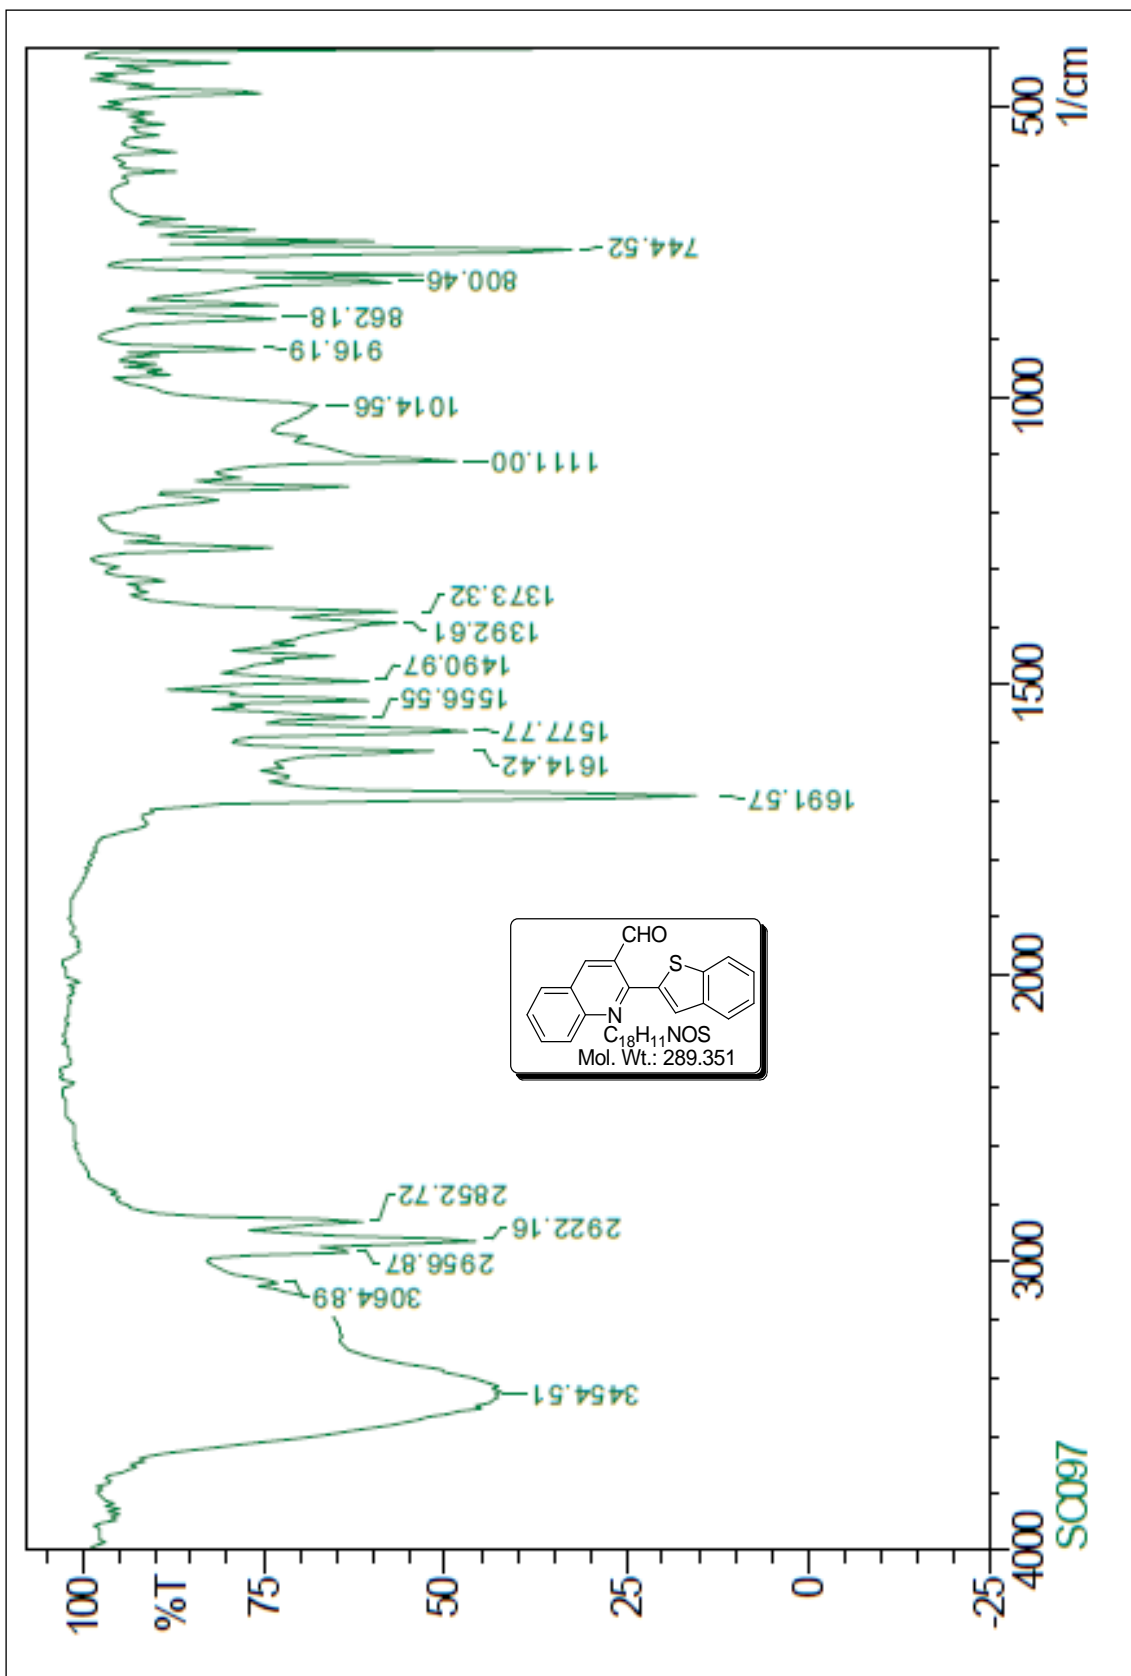

+MS, 3.6min #195

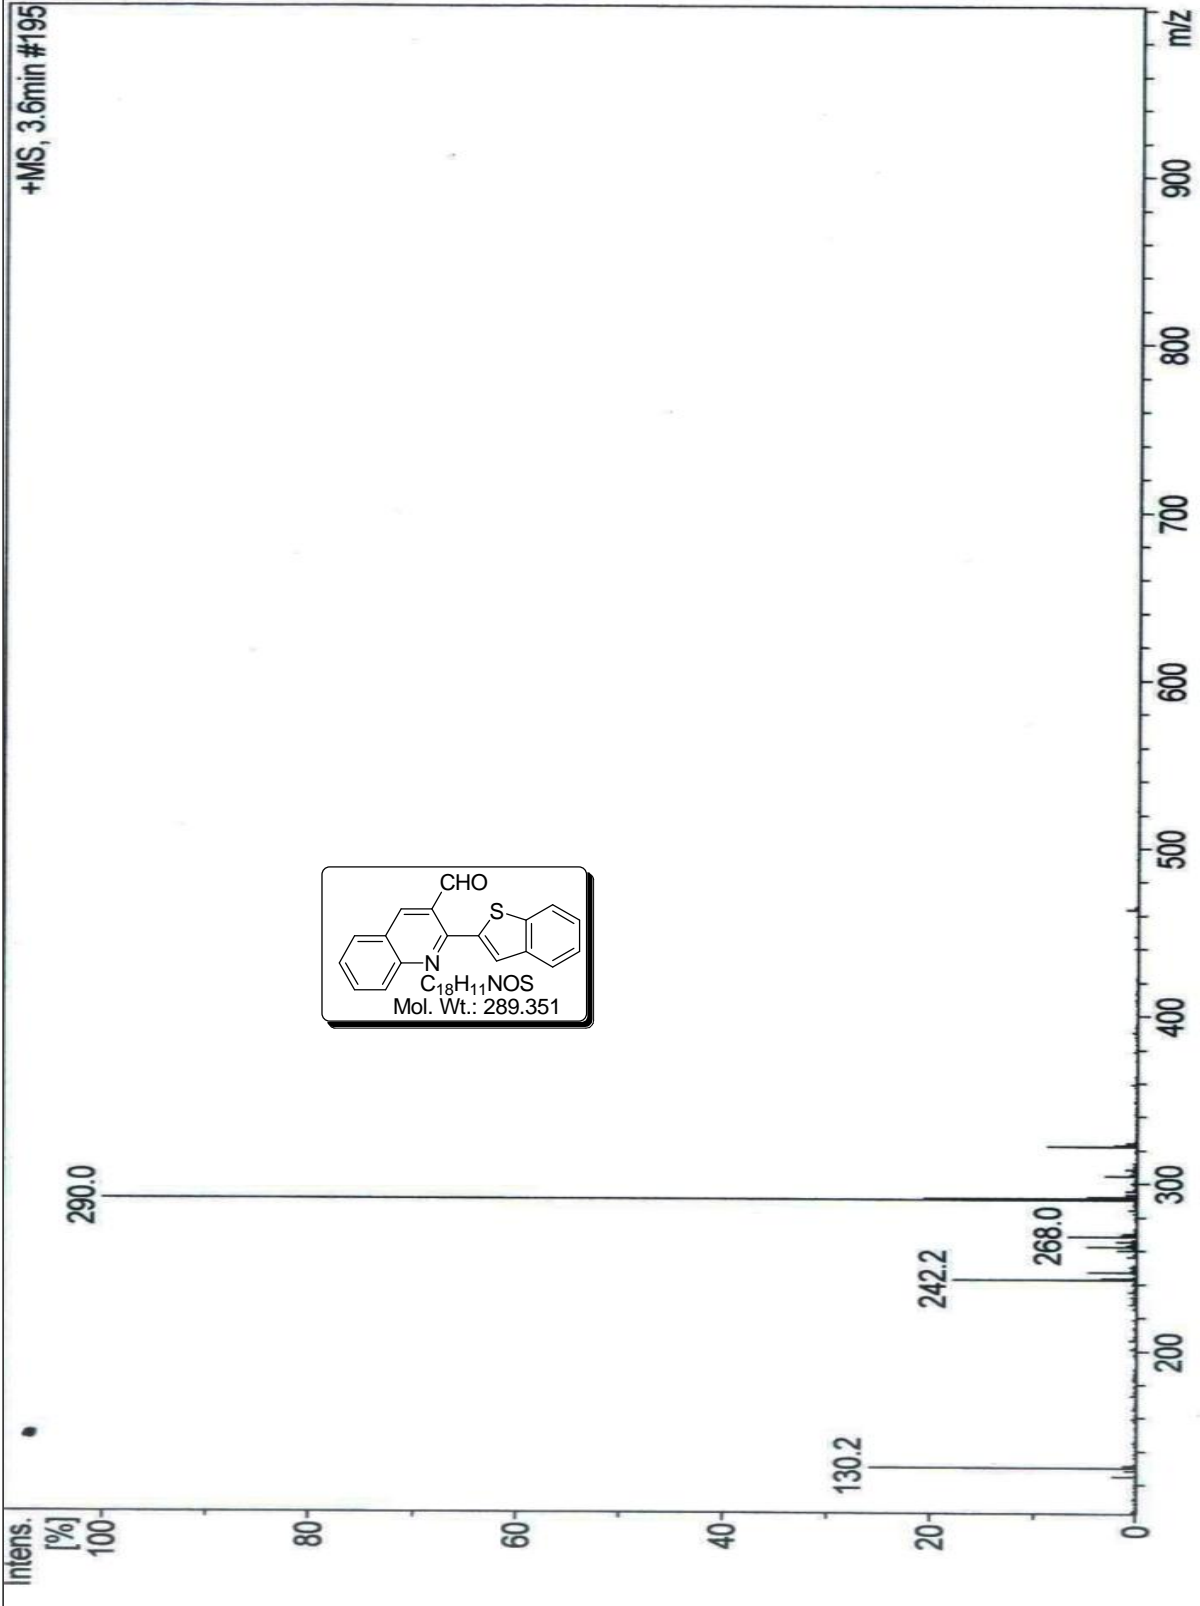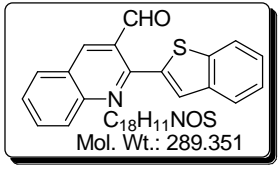

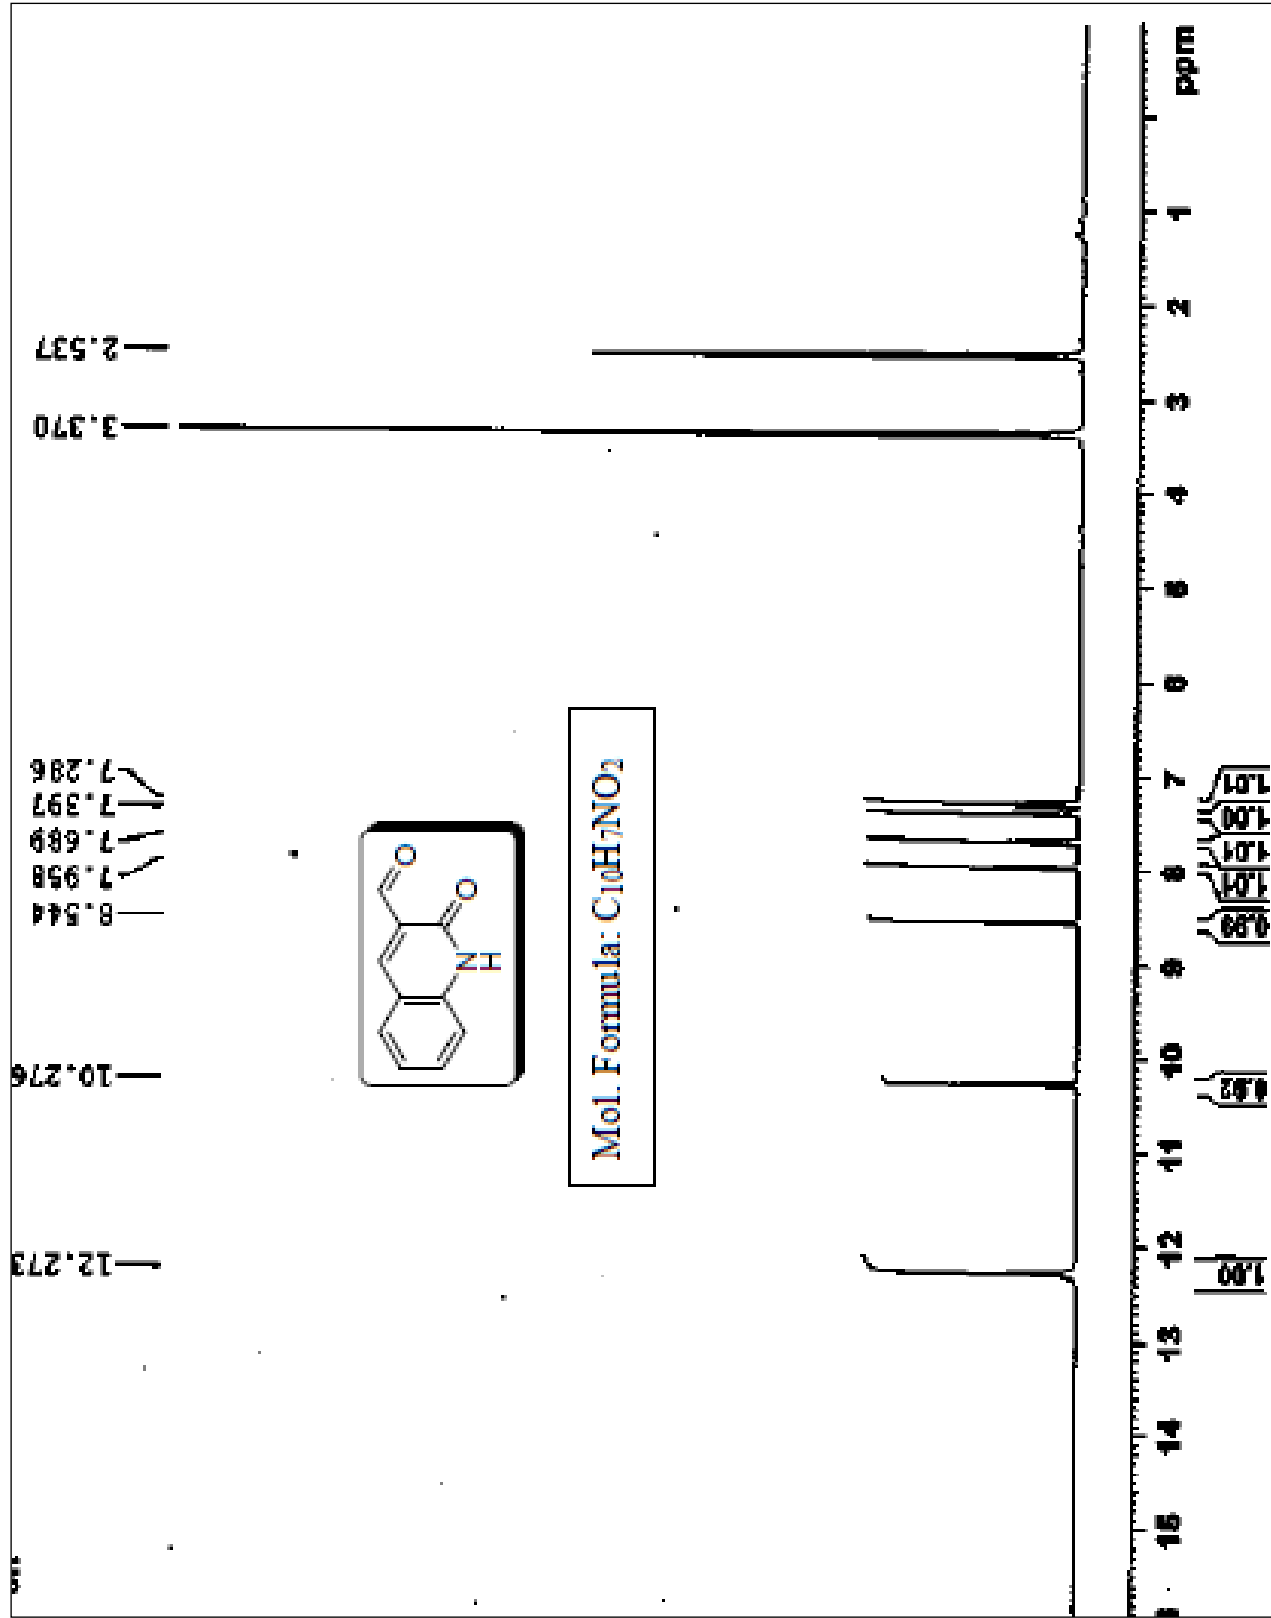



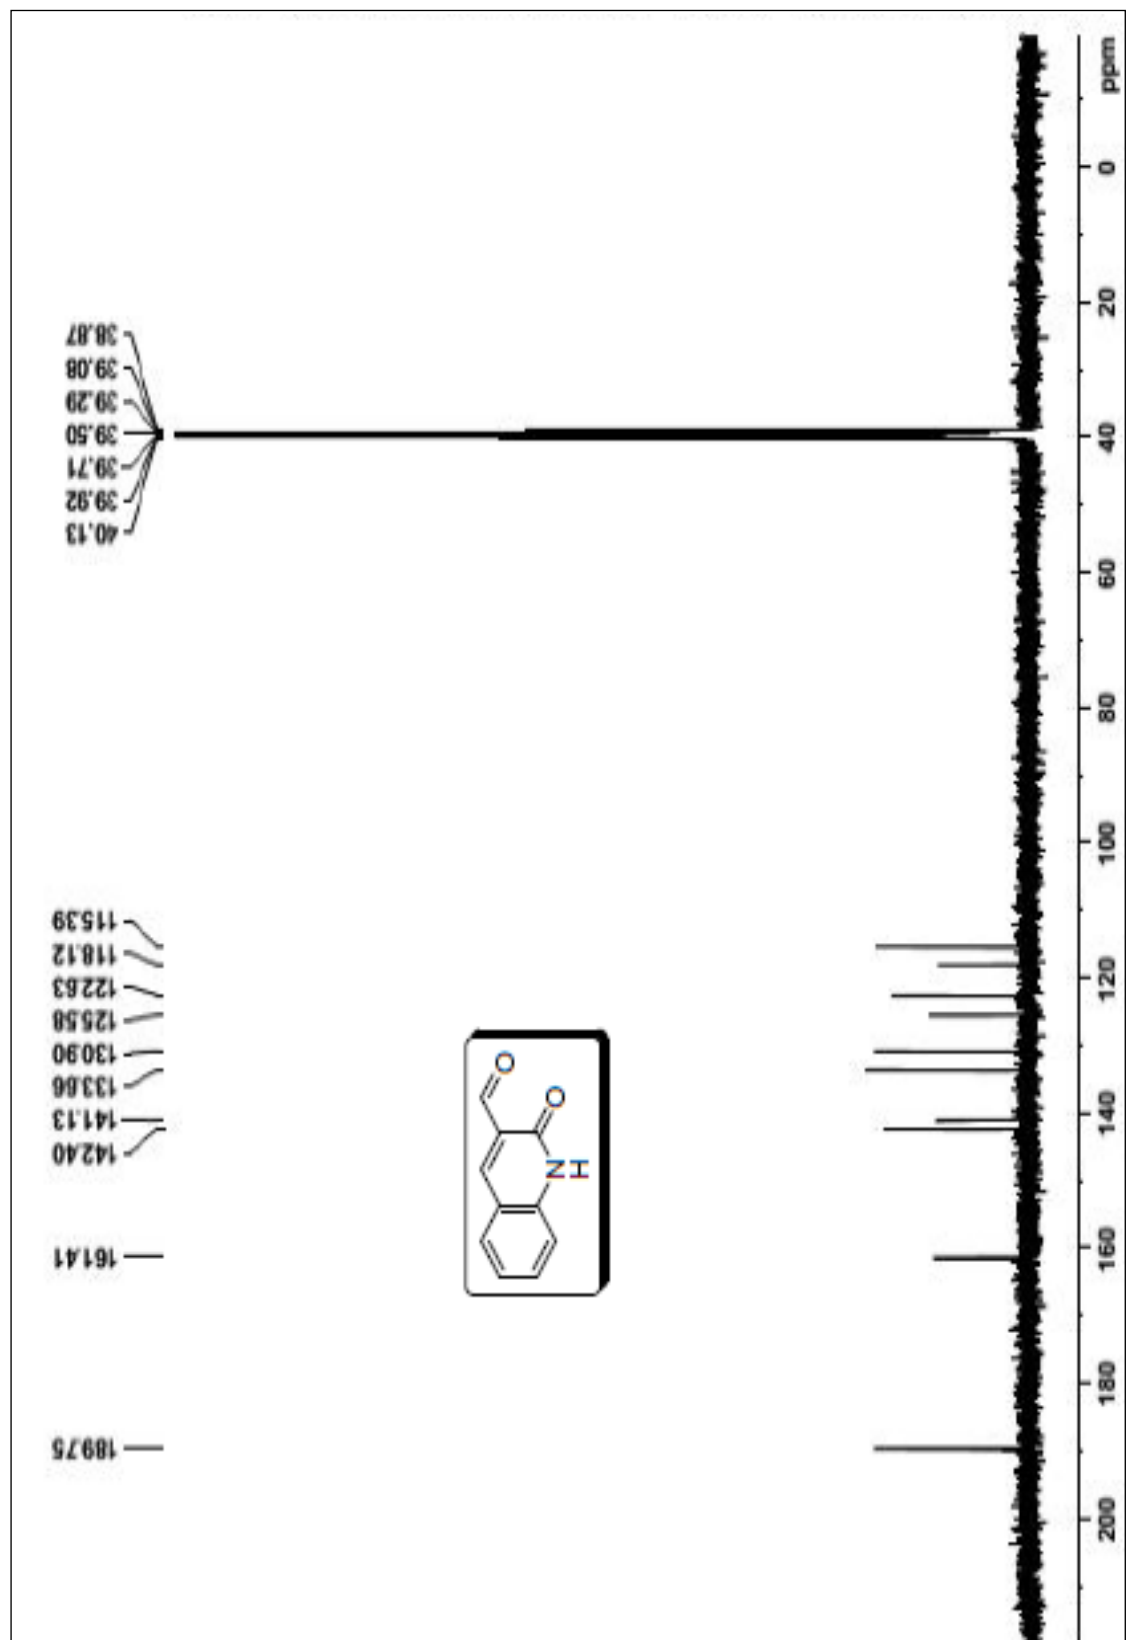

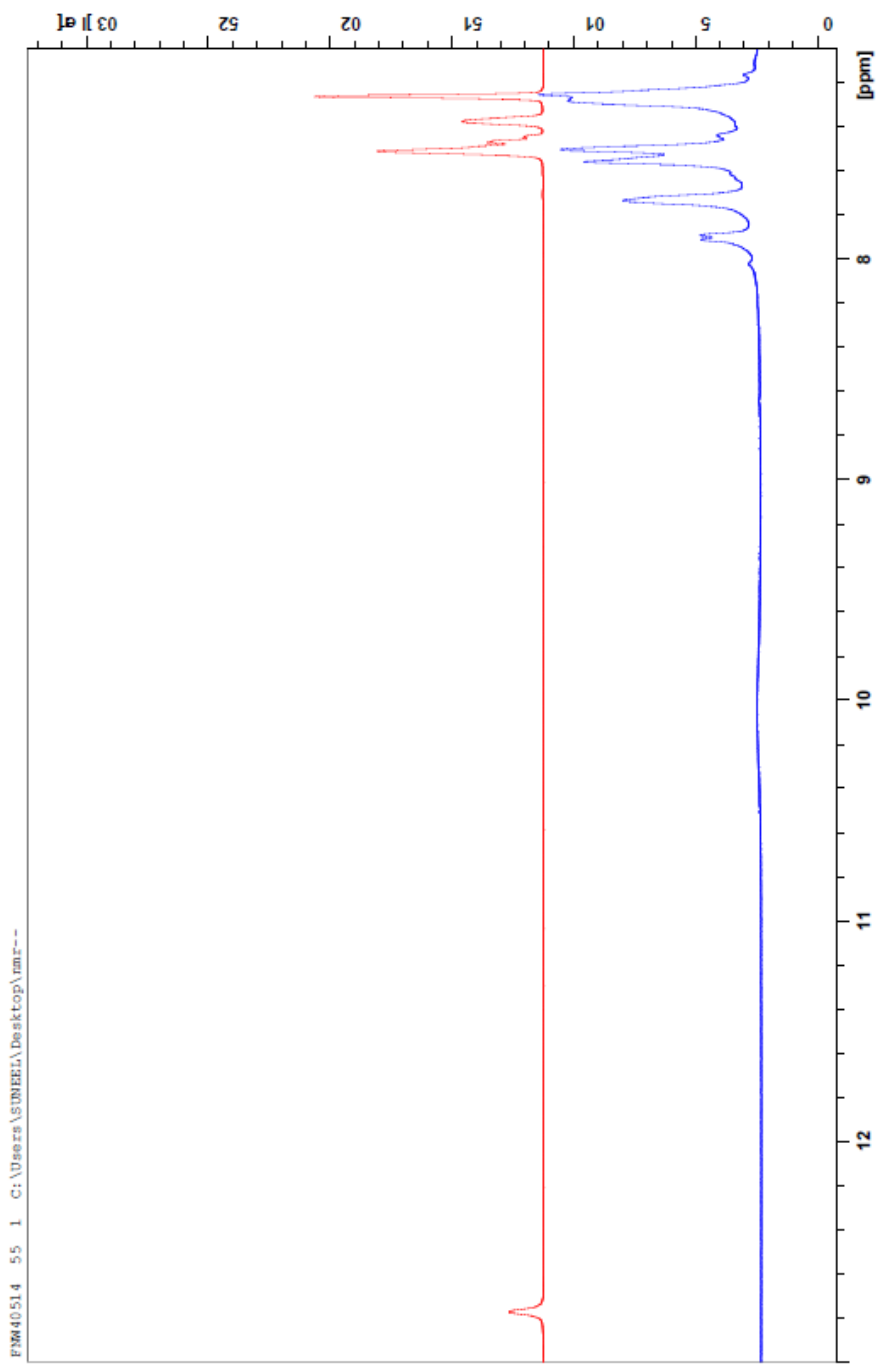

F:\40514\_55\_1\_C:\Users\SUNBEI\Desktop\untitled

PMW40514 55 1 C:\Users\USER\OneDrive\Desktop\war--

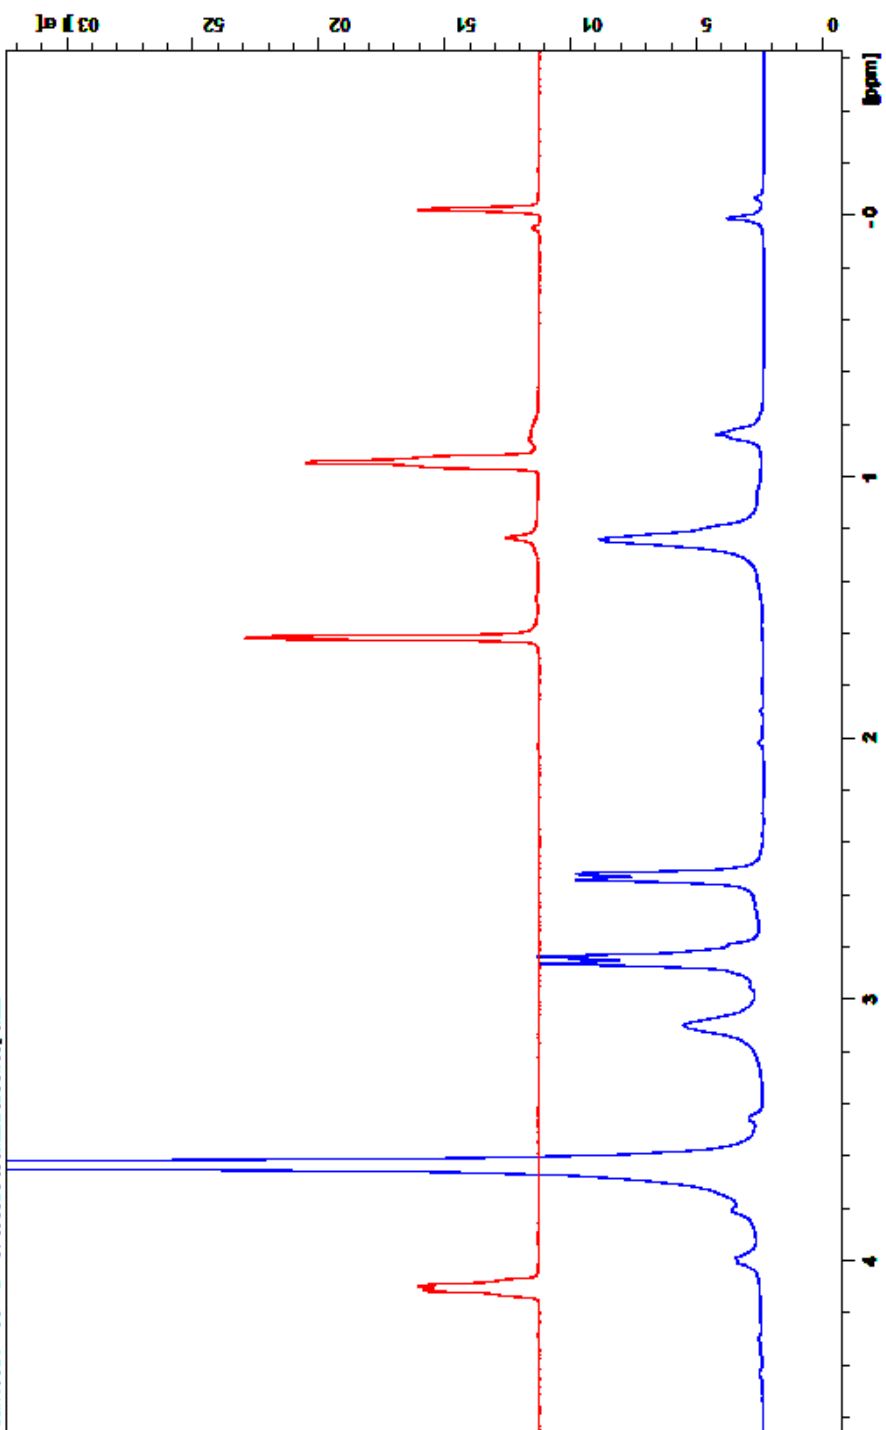

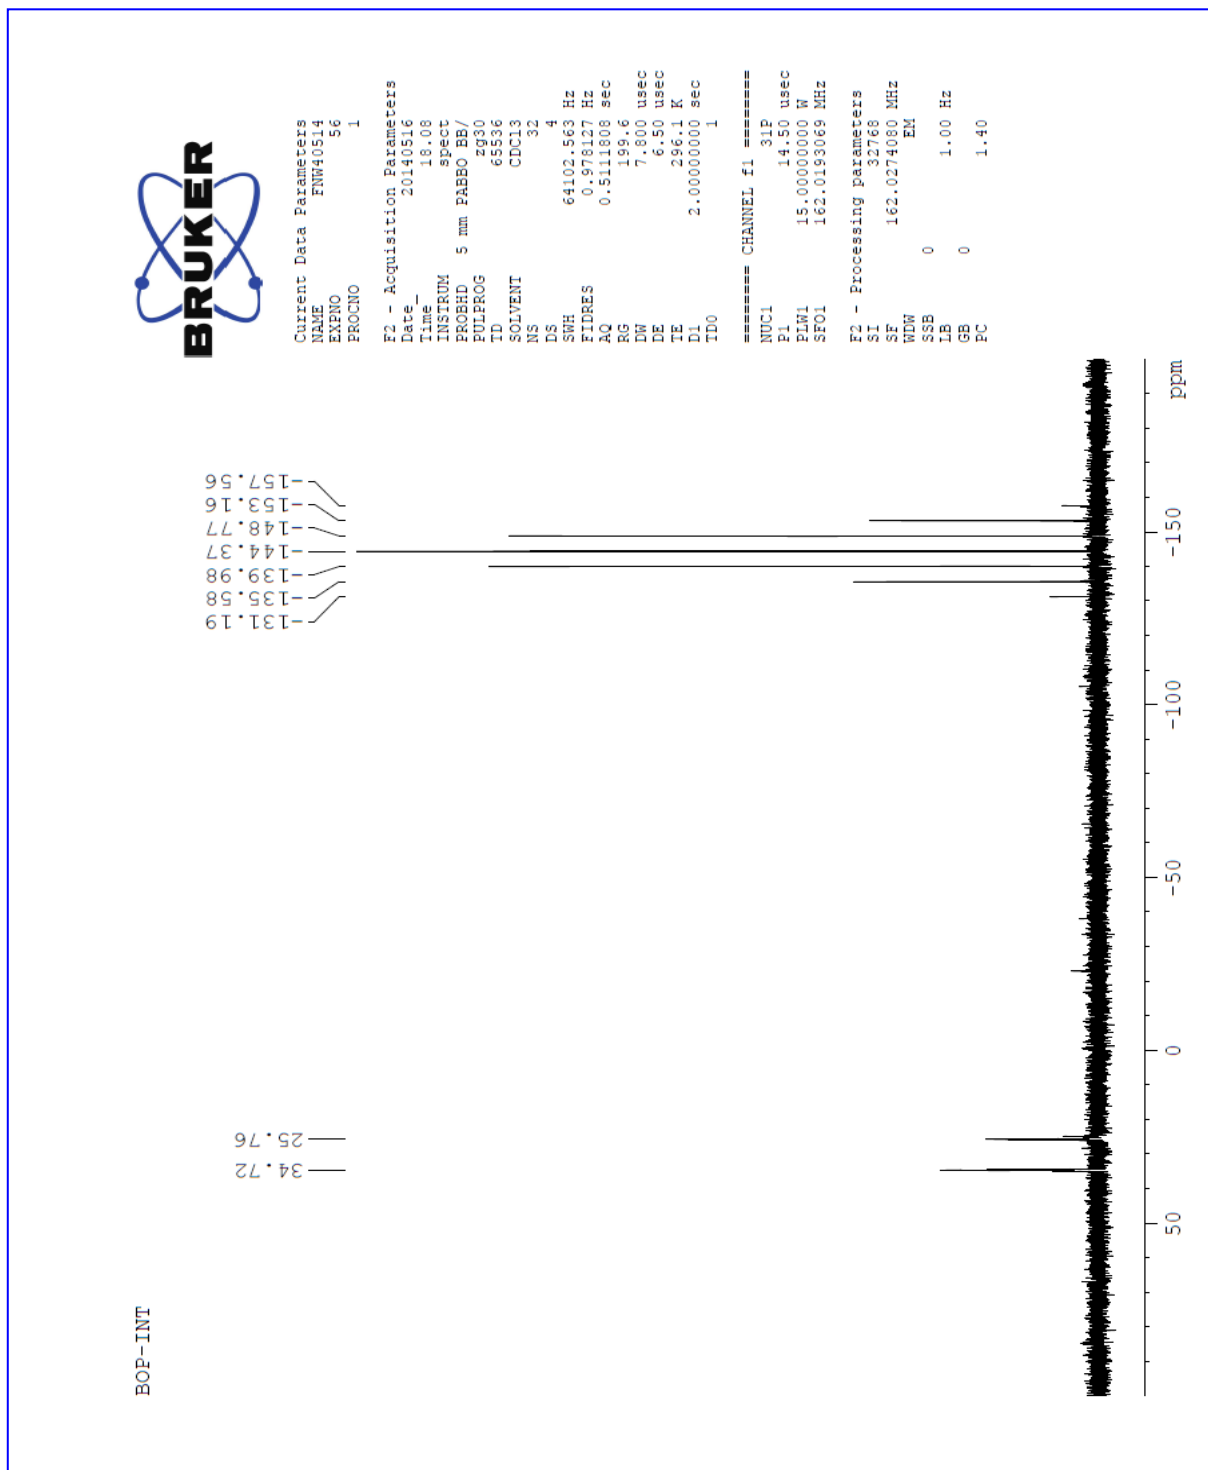

The Overlap  $^1\text{H}$  NMR spectra of the starting material (red spectrum) and the phosphonium salt intermediate (blue spectrum) and the P NMR of the phosphonium salt intermediate
